# Supplementary material for: DABCO catalyzed [4+2] annulations of Morita–Baylis–Hillman carbonates with isocyanates
Source: Royal Society of Chemistry journal article supplement (doi:10.1039/d1cc03502a), 2021-01-01

*Supporting Information for*

**DABCO Catalyzed [4+2] Annulations of Morita–Baylis–Hillman  
Carbonates with Isocyanates**

Wei Cai, Yiming Zhou, Yanlin He, and You Huang\*

State Key Laboratory and Institute of Elemento-Organic Chemistry, College of Chemistry, Nankai University,  
Tianjin 300071, People's Republic of China

## CONTENTS

|      |                                                                                                       |    |
|------|-------------------------------------------------------------------------------------------------------|----|
| 1.   | General methods.....                                                                                  | 3  |
| 2.   | Synthesis of <i>o</i> -amino-acylation aryl MBH carbonates 1 .....                                    | 4  |
| 2.1  | General procedure for the synthesis of substituted <i>o</i> -amino-acylation aryl MBH carbonates..... | 4  |
| 2.2  | Characterization Data of <i>o</i> -amino-acylation aryl MBH carbonates.....                           | 5  |
| 3.   | General Procedure of Optimization and Substrate Scope .....                                           | 9  |
| 3.2. | General procedure 1 (GP1) for the synthesis of 3,4-dihydroquinazolinone .....                         | 9  |
| 3.3. | Optimization of intermolecular cycloaddition reaction conditions.....                                 | 9  |
| 4.   | Gram scale reactions and synthetic transformations .....                                              | 10 |
| 4.1. | Gram scale reactions .....                                                                            | 10 |
| 4.2. | Synthetic transformations.....                                                                        | 10 |
| 5.   | Density Functional Theory (DFT) Calculations.....                                                     | 12 |
| 5.1. | Computational Methods .....                                                                           | 12 |
| 5.2. | Calculated data .....                                                                                 | 12 |
| 6.   | Analytical Data.....                                                                                  | 14 |
| 6.1. | DABCO catalyzed [4+2] cycloadducts 3 .....                                                            | 14 |
| 6.2. | Products of derivatization.....                                                                       | 24 |
| 7.   | X-ray Crystallographic Analysis.....                                                                  | 26 |
| 8.   | NMR Spectra.....                                                                                      | 27 |
| 8.1. | <i>o</i> -Amino-acylation aryl MBH carbonates .....                                                   | 27 |
| 8.2. | DABCO catalyzed [4+2] cycloadducts 3 .....                                                            | 49 |
| 8.3. | Products of Derivatization.....                                                                       | 92 |

## 1. General methods

$^1\text{H}$  NMR (400 MHz) and  $^{13}\text{C}$  NMR (101 MHz) were recorded on a Bruker AV 400 (400 MHz) spectrometer with  $\text{CDCl}_3$  as solvent (Unless otherwise noted, records are all performed at ambient temperature). Chemical shifts were reported in parts per million (ppm), and the residual solvent peak was used as an internal reference: proton ( $\text{CDCl}_3$ :  $\delta$  7.26 ppm), carbon ( $\text{CDCl}_3$ :  $\delta$  77.07 ppm) or tetramethylsilane (TMS  $\delta$  0.00). Multiplicity is indicated as follows: s (singlet), d (doublet), t (triplet), q (quartet), dd (doublet of doublet), m (multiplet). Coupling constants  $J$  are reported in Hz. HRMS were obtained on Agilent 6520 Q-TOF LC/MS with ESI resource. Melting points were measured on a RY-I apparatus and are reported uncorrected. Column chromatography was performed on silica gel 200-300 mesh.

All reactions were carried out under nitrogen or argon atmosphere. Unless otherwise noted, analytical grade solvents and commercially available reagents were used without further purification. All isocyanates used in the article are commercially available.

## 2. Synthesis of *o*-amino-acylation aryl MBH carbonates 1

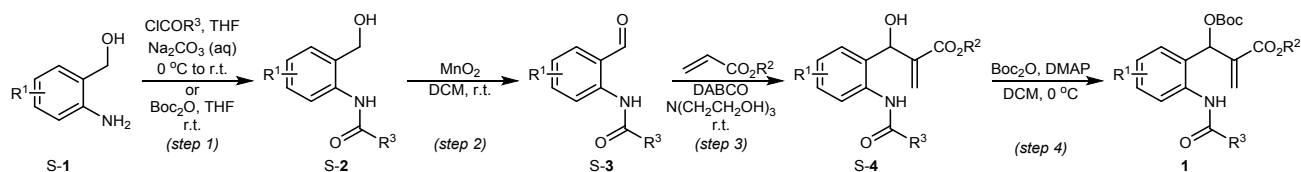

### General procedure for the synthesis of substituted *o*-amino-acylation aryl MBH carbonates

*o*-amino-acylation aryl MBH carbonates were synthesized following the general procedure shown in the figure above. Depending on which substrates were commercial available, the starting point for the synthesis was *o*-amino benzyl alcohol (S-1) (Commercially available or reduced from *o*-amino benzoic acid<sup>1</sup>). Analogues of S-4 have been reported earlier<sup>2</sup>. Step 4 is the classic hydroxyl protection<sup>3</sup>.

21 kinds of substituted *o*-amino-acylation aryl MBH carbonates were prepared according to the above method (Supplementary Fig. 1).

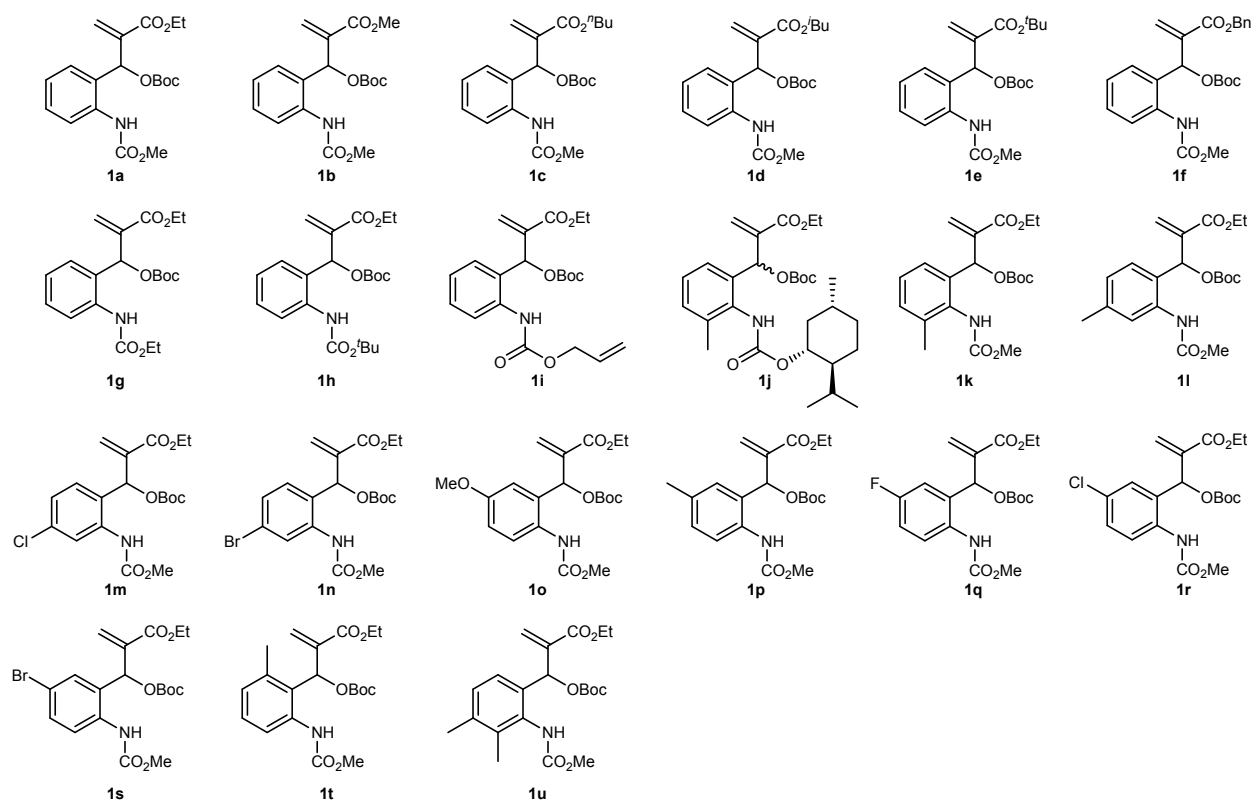

**Figure S1.** Scopes of *o*-amino-acylation aryl MBH carbonates.

<sup>1</sup> L. A. Leth, F. Glaus, M. Meazza, L. Fu, M. K. Thøgersen, E. A. Bitsch and K. A. Jørgensen, *Angew. Chem. Int. Ed.*, 2016, **55**, 15272-15276. <sup>2</sup> H. N. Lim, Y. S. Song and K.-J. Lee, *Synthesis*, 2007, **2007**, 3376-3384. <sup>3</sup> Y. Du, X. Lu and C. Zhang, *Angew. Chem., Int. Ed.*, 2003, **42**, 1035-1037.

## 2.2 Characterization Data of o-amino-acylation aryl MBH carbonates

### ethyl 2-(((tert-butoxycarbonyl)oxy)(2-((methoxycarbonyl)amino)phenyl)methyl)acrylate (1a)

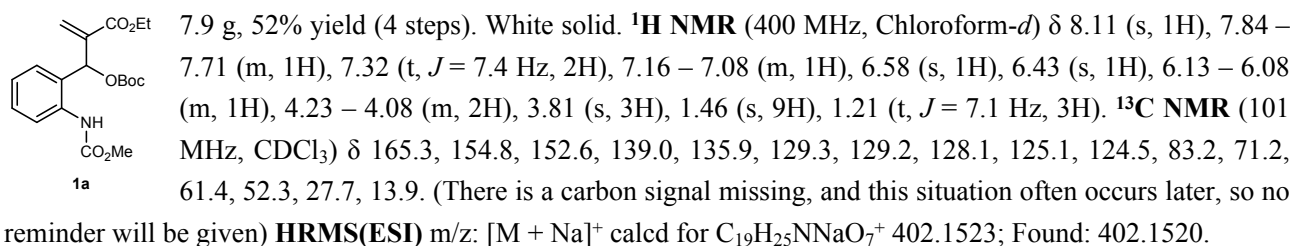

### methyl 2-(((tert-butoxycarbonyl)oxy)(2-((methoxycarbonyl)amino)phenyl)methyl)acrylate (1b)

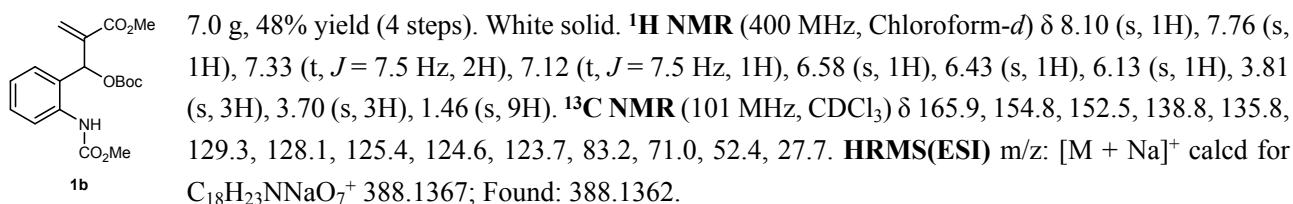

### butyl 2-(((tert-butoxycarbonyl)oxy)(2-((methoxycarbonyl)amino)phenyl)methyl)acrylate (1c)

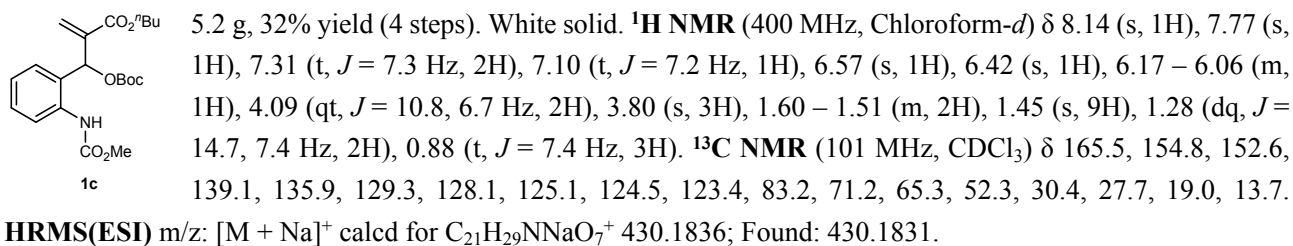

### isobutyl 2-(((tert-butoxycarbonyl)oxy)(2-((methoxycarbonyl)amino)phenyl)methyl)acrylate (1d)

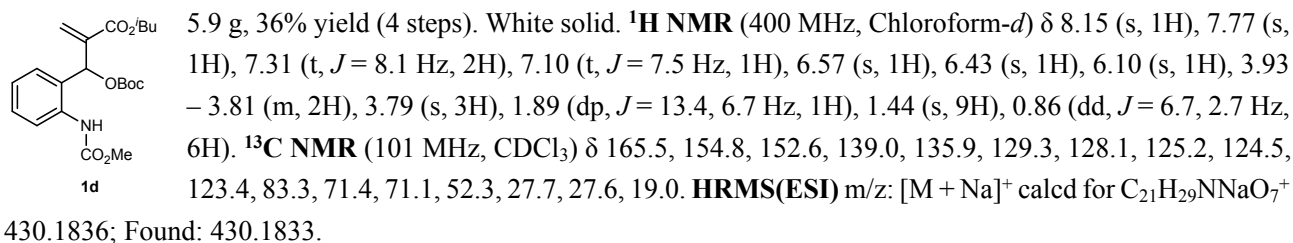

### tert-butyl 2-(((tert-butoxycarbonyl)oxy)(2-((methoxycarbonyl)amino)phenyl)methyl)acrylate (1e)

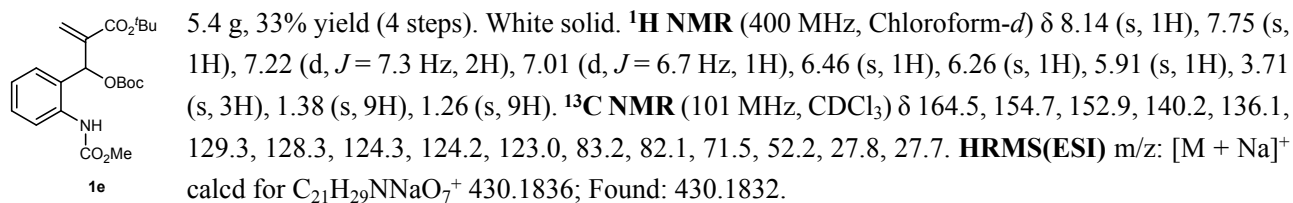

### benzyl 2-(((tert-butoxycarbonyl)oxy)(2-((methoxycarbonyl)amino)phenyl)methyl)acrylate (1f)

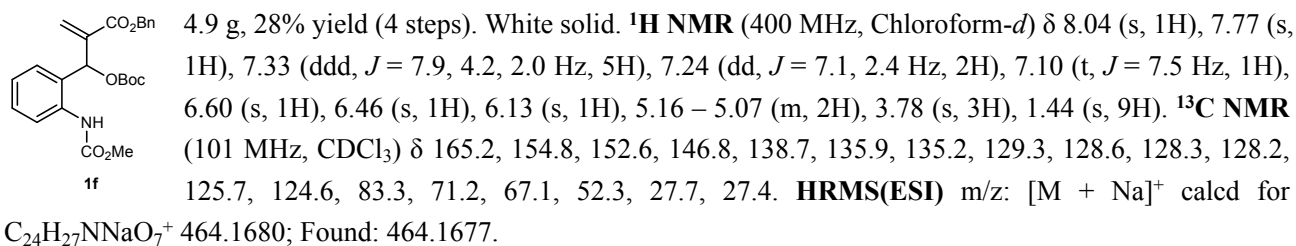

**ethyl 2-(((tert-butoxycarbonyl)oxy)(2-((ethoxycarbonyl)amino)phenyl)methyl)acrylate (1g)**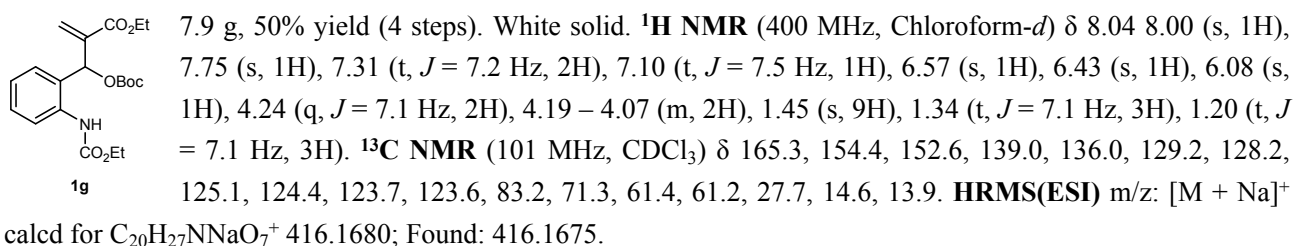**ethyl 2-((2-((tert-butoxycarbonyl)amino)phenyl)((tert-butoxycarbonyl)oxy)methyl)acrylate (1h)**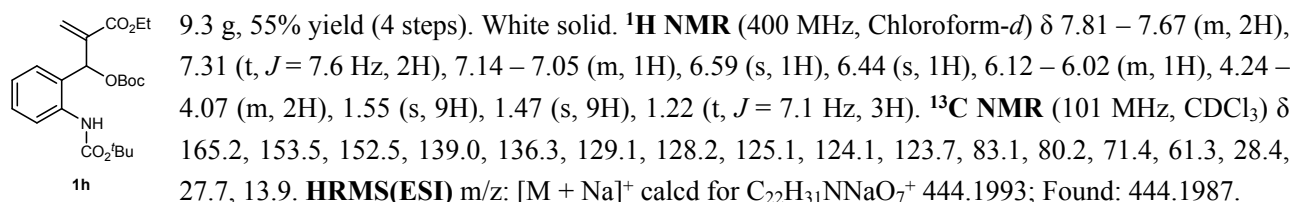**ethyl 2-((2-(((allyloxy)carbonyl)amino)phenyl)((tert-butoxycarbonyl)oxy)methyl)acrylate (1i)**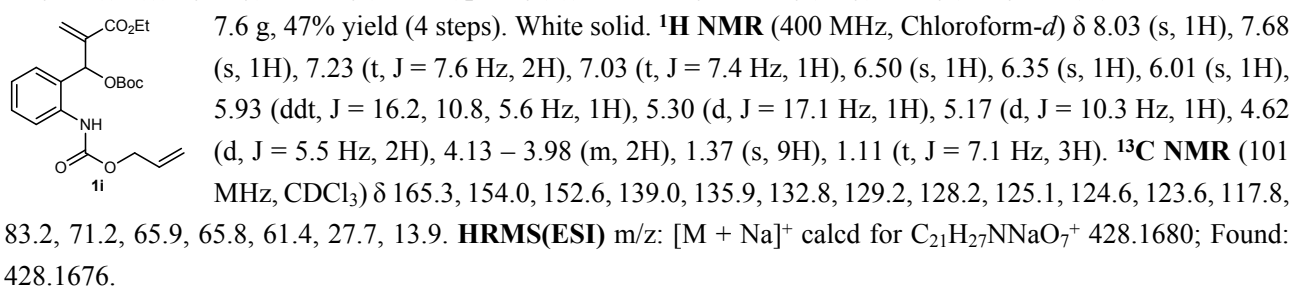**ethyl 2-(((tert-butoxycarbonyl)oxy)(2-((((1R,2S,5R)-2-isopropyl-5-methylcyclohexyl)oxy)carbonyl)amino)-3-methylphenyl)methyl)acrylate (1j)**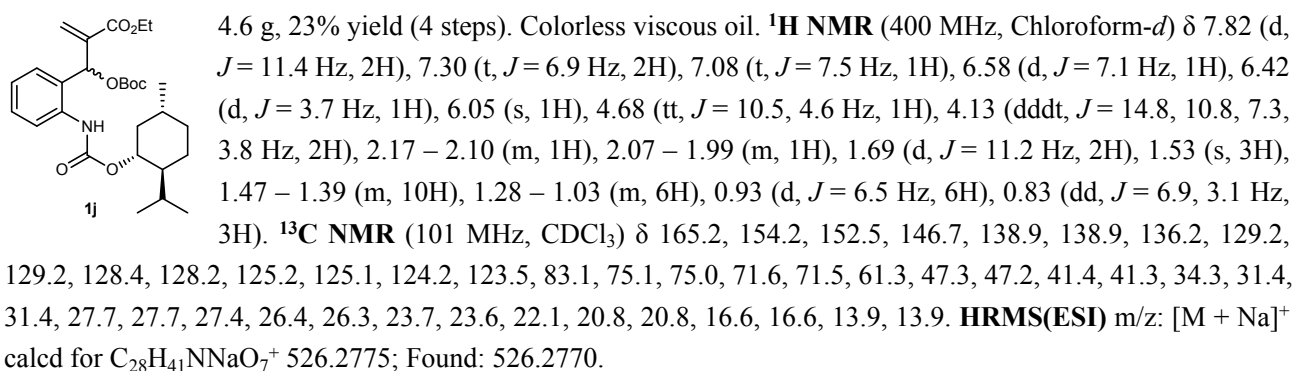**ethyl 2-(((tert-butoxycarbonyl)oxy)(2-((methoxycarbonyl)amino)-3-methylphenyl)methyl)acrylate (1k)**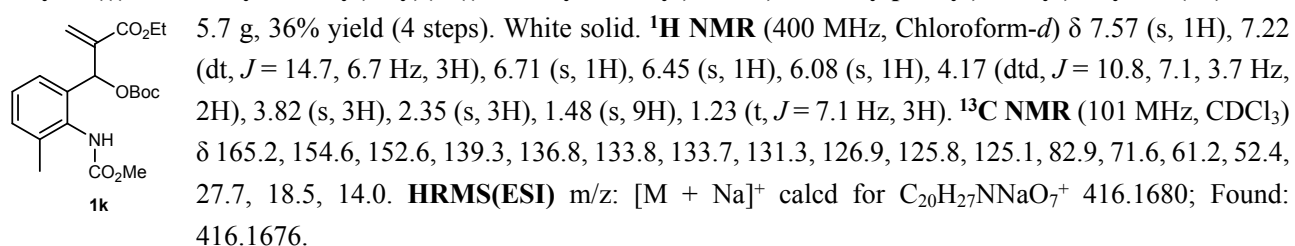**ethyl 2-(((tert-butoxycarbonyl)oxy)(2-((methoxycarbonyl)amino)-4-methylphenyl)methyl)acrylate (1l)**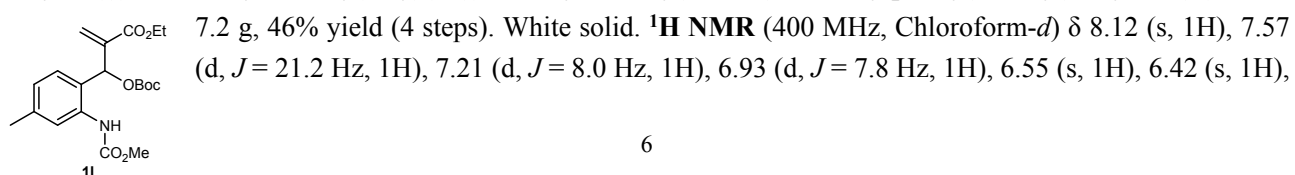

6.10 (s, 1H), 4.15 (qt,  $J = 10.7, 5.4$  Hz, 2H), 3.81 (s, 3H), 2.34 (s, 3H), 1.46 (s, 9H), 1.21 (t,  $J = 7.1$  Hz, 3H).  $^{13}\text{C}$  NMR (101 MHz,  $\text{CDCl}_3$ )  $\delta$  165.4, 154.8, 152.7, 139.4, 139.1, 135.7, 128.0, 125.5, 124.9, 124.0, 83.1, 71.1, 61.4, 52.3, 27.7, 21.4, 13.9. HRMS(ESI)  $m/z$ :  $[\text{M} + \text{Na}]^+$  calcd for  $\text{C}_{20}\text{H}_{27}\text{NNaO}_7^+$  416.1680; Found: 416.1677.

**ethyl 2-(((tert-butoxycarbonyl)oxy)(4-chloro-2-((methoxycarbonyl)amino)phenyl)methyl)acrylate (1m)**

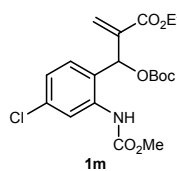

8.1 g, 49% yield (4 steps). White solid.  $^1\text{H}$  NMR (400 MHz, Chloroform- $d$ )  $\delta$  8.24 (s, 1H), 7.86 (s, 1H), 7.24 (d,  $J = 8.4$  Hz, 1H), 7.07 (dd,  $J = 8.4, 2.0$  Hz, 1H), 6.50 (s, 1H), 6.44 (s, 1H), 6.15 – 6.10 (m, 1H), 4.25 – 4.06 (m, 2H), 3.81 (s, 3H), 1.45 (s, 9H), 1.21 (t,  $J = 7.1$  Hz, 3H).  $^{13}\text{C}$  NMR (101 MHz,  $\text{CDCl}_3$ )  $\delta$  165.3, 154.4, 152.5, 138.7, 137.1, 135.0, 129.2, 126.6, 125.3, 124.6, 123.0, 83.5, 70.5, 61.5, 52.5, 27.7, 13.9. HRMS(ESI)  $m/z$ :  $[\text{M} + \text{Na}]^+$  calcd for  $\text{C}_{19}\text{H}_{24}\text{ClNNaO}_7^+$  436.1133; Found: 436.1130.

**ethyl 2-((4-bromo-2-((methoxycarbonyl)amino)phenyl)((tert-butoxycarbonyl)oxy)methyl)acrylate (1n)**

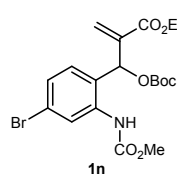

6.4 g, 35% yield (4 steps). White solid.  $^1\text{H}$  NMR (400 MHz, Chloroform- $d$ )  $\delta$  8.16 (s, 1H), 7.94 (s, 1H), 7.17 – 7.13 (m, 1H), 7.10 (d,  $J = 8.4$  Hz, 1H), 6.42 (s, 1H), 6.36 (s, 1H), 6.05 (s, 1H), 4.06 (qt,  $J = 10.8, 5.4$  Hz, 2H), 3.73 (s, 3H), 1.38 (s, 9H), 1.14 (t,  $J = 7.1$  Hz, 3H).  $^{13}\text{C}$  NMR (101 MHz,  $\text{CDCl}_3$ )  $\delta$  165.3, 154.4, 152.5, 146.8, 138.6, 137.2, 129.5, 127.5, 126.1, 125.3, 123.0, 83.5, 70.5, 61.5, 52.5, 27.7, 13.9. HRMS(ESI)  $m/z$ :  $[\text{M} + \text{Na}]^+$  calcd for  $\text{C}_{19}\text{H}_{24}\text{BrNNaO}_7^+$  480.0628; Found: 480.0624.

**ethyl 2-(((tert-butoxycarbonyl)oxy)(5-methoxy-2-((methoxycarbonyl)amino)phenyl)methyl)acrylate (1o)**

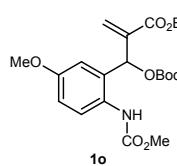

7.2 g, 44% yield (4 steps). White solid.  $^1\text{H}$  NMR (400 MHz, Chloroform- $d$ )  $\delta$  7.84 (s, 1H), 7.53 (s, 1H), 6.80 (dd,  $J = 15.4, 5.9$  Hz, 2H), 6.53 – 6.47 (m, 1H), 6.37 (d,  $J = 5.6$  Hz, 1H), 6.03 (d,  $J = 5.0$  Hz, 1H), 4.08 (q,  $J = 7.4$  Hz, 2H), 3.76 – 3.65 (m, 6H), 1.39 (d,  $J = 7.9$  Hz, 9H), 1.14 (q,  $J = 7.2$  Hz, 3H).  $^{13}\text{C}$  NMR (101 MHz,  $\text{CDCl}_3$ )  $\delta$  165.2, 156.7, 155.2, 152.5, 139.0, 130.6, 128.8, 125.7, 125.2, 114.7, 113.1, 83.2, 70.9, 61.3, 55.4, 52.2, 27.7, 13.9. HRMS(ESI)  $m/z$ :  $[\text{M} + \text{Na}]^+$  calcd for  $\text{C}_{20}\text{H}_{27}\text{NNaO}_8^+$  432.1629; Found: 432.1624.

**ethyl 2-(((tert-butoxycarbonyl)oxy)(2-((methoxycarbonyl)amino)-5-methylphenyl)methyl)acrylate (1p)**

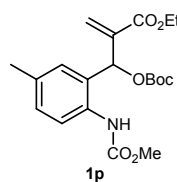

8.0 g, 51% yield (4 steps). White solid.  $^1\text{H}$  NMR (400 MHz, Chloroform- $d$ )  $\delta$  8.14 (s, 1H), 7.73 (s, 1H), 7.25 (d,  $J = 8.3$  Hz, 2H), 6.68 (s, 1H), 6.55 (s, 1H), 6.22 (s, 1H), 4.34 – 4.20 (m, 2H), 3.92 (s, 3H), 2.42 (s, 3H), 1.59 (s, 9H), 1.33 (t,  $J = 7.1$  Hz, 3H).  $^{13}\text{C}$  NMR (101 MHz,  $\text{CDCl}_3$ )  $\delta$  165.4, 155.0, 152.6, 149.8, 139.1, 133.3, 130.1, 128.4, 125.0, 123.8, 83.2, 71.2, 61.4, 52.3, 27.7, 20.9, 13.9. HRMS(ESI)  $m/z$ :  $[\text{M} + \text{Na}]^+$  calcd for  $\text{C}_{20}\text{H}_{27}\text{NNaO}_7^+$  416.1680; Found: 416.1676.

**ethyl 2-(((tert-butoxycarbonyl)oxy)(5-fluoro-2-((methoxycarbonyl)amino)phenyl)methyl)acrylate (1q)**

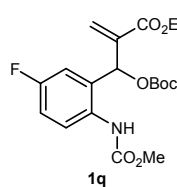

6.7 g, 42% yield (4 steps). White solid.  $^1\text{H}$  NMR (400 MHz, Chloroform- $d$ )  $\delta$  8.10 (s, 1H), 7.82 – 7.57 (m, 1H), 7.06 – 6.98 (m, 2H), 6.57 – 6.50 (m, 1H), 6.45 (s, 1H), 6.18 – 6.12 (m, 1H), 4.16 (tdd,  $J = 10.9, 9.0, 5.4$  Hz, 2H), 3.79 (s, 3H), 1.53 (s, 3H), 1.46 (s, 9H), 1.21 (t,  $J = 7.1$  Hz, 3H).  $^{13}\text{C}$  NMR (101 MHz,  $\text{CDCl}_3$ )  $\delta$  165.2, 155.0, 152.4, 146.7, 138.7, 131.8, 125.4, 116.2 (d,  $J = 22.3$  Hz), 114.4 (d,  $J = 23.5$  Hz), 85.2, 83.5, 70.4, 61.5, 52.4, 27.7, 27.4, 13.9.  $^{19}\text{F}$  NMR (377 MHz, Chloroform- $d$ )  $\delta$  -117.25. HRMS(ESI)  $m/z$ :  $[\text{M} + \text{Na}]^+$  calcd for  $\text{C}_{19}\text{H}_{24}\text{FNNaO}_7^+$  420.1429; Found: 420.1424.

**ethyl 2-(((tert-butoxycarbonyl)oxy)(5-chloro-2-((methoxycarbonyl)amino)phenyl)methyl)acrylate (1r)**

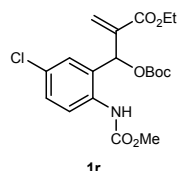

7.3 g, 44% yield (4 steps). White solid.  $^1\text{H}$  NMR (400 MHz, Chloroform- $d$ )  $\delta$  8.17 (s, 1H), 7.72 (s, 1H), 7.27 (d,  $J = 6.8$  Hz, 2H), 6.50 (s, 1H), 6.46 (s, 1H), 6.17 – 6.12 (m, 1H), 4.22 – 4.08 (m,

2H), 3.80 (s, 3H), 1.46 (s, 9H), 1.22 (t,  $J = 7.1$  Hz, 3H).  $^{13}\text{C}$  NMR (101 MHz,  $\text{CDCl}_3$ )  $\delta$  165.3, 154.7, 152.4, 138.6, 134.5, 129.7, 129.4, 127.9, 125.6, 124.9, 83.6, 70.3, 61.6, 52.4, 27.7, 13.9. **HRMS(ESI)**  $m/z$ :  $[\text{M} + \text{Na}]^+$  calcd for  $\text{C}_{19}\text{H}_{24}\text{ClNNaO}_7^+$  436.1133; Found: 436.1128.

**ethyl 2-((5-bromo-2-((methoxycarbonyl)amino)phenyl)((tert-butoxycarbonyl)oxy)methyl)acrylate (1s)**

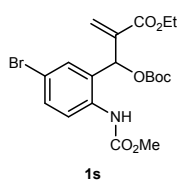

5.7 g, 31% yield (4 steps). White solid.  $^1\text{H}$  NMR (400 MHz, Chloroform- $d$ )  $\delta$  8.15 (s, 1H), 7.67 (s, 1H), 7.41 (d,  $J = 8.0$  Hz, 2H), 6.50 (s, 1H), 6.46 (s, 1H), 6.14 (s, 1H), 4.16 (qd,  $J = 10.9, 5.5$  Hz, 2H), 3.80 (s, 3H), 1.46 (s, 9H), 1.22 (t,  $J = 7.1$  Hz, 3H).  $^{13}\text{C}$  NMR (101 MHz,  $\text{CDCl}_3$ )  $\delta$  165.2, 154.6, 152.4, 138.6, 135.0, 132.2, 130.8, 130.6, 125.6, 125.1, 117.3, 83.6, 70.3, 61.6, 52.4, 27.7, 13.9. **HRMS(ESI)**  $m/z$ :  $[\text{M} + \text{Na}]^+$  calcd for  $\text{C}_{19}\text{H}_{24}\text{BrNNaO}_7^+$  480.0628; Found: 480.0623.

**ethyl 2-(((tert-butoxycarbonyl)oxy)(2-((methoxycarbonyl)amino)-6-methylphenyl)methyl)acrylate (1t)**

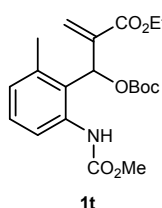

7.5 g, 48% yield (4 steps). White solid.  $^1\text{H}$  NMR (400 MHz, Chloroform- $d$ )  $\delta$  7.67 (s, 1H), 7.58 (s, 1H), 7.23 (t,  $J = 7.9$  Hz, 1H), 6.94 (d,  $J = 7.5$  Hz, 1H), 6.90 (s, 1H), 6.39 (s, 1H), 5.68 (s, 1H), 4.18 (q,  $J = 7.1$  Hz, 2H), 3.75 (s, 3H), 2.45 (s, 3H), 1.46 (s, 9H), 1.25 (t,  $J = 7.1$  Hz, 3H).  $^{13}\text{C}$  NMR (101 MHz,  $\text{CDCl}_3$ )  $\delta$  165.3, 154.6, 152.2, 138.2, 137.3, 137.1, 129.2, 127.2, 126.9, 121.6, 83.1, 72.2, 61.2, 52.3, 27.7, 20.2, 14.0. **HRMS(ESI)**  $m/z$ :  $[\text{M} + \text{Na}]^+$  calcd for  $\text{C}_{20}\text{H}_{27}\text{NNaO}_7^+$  416.1680; Found: 416.1675.

**ethyl 2-(((tert-butoxycarbonyl)oxy)(2-((methoxycarbonyl)amino)-3,4-dimethylphenyl)methyl)acrylate (1u)**

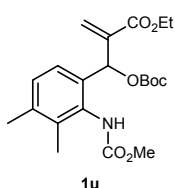

8.0 g, 49% yield (4 steps). White solid.  $^1\text{H}$  NMR (400 MHz, Chloroform- $d$ )  $\delta$  7.51 (s, 1H), 7.08 (q,  $J = 7.9$  Hz, 2H), 6.64 (s, 1H), 6.39 (s, 1H), 6.03 (s, 1H), 4.13 (q,  $J = 7.0$  Hz, 2H), 3.73 (d,  $J = 43.5$  Hz, 3H), 2.27 (s, 3H), 2.18 (s, 3H), 1.44 (s, 9H), 1.19 (t,  $J = 7.0$  Hz, 3H).  $^{13}\text{C}$  NMR (101 MHz,  $\text{CDCl}_3$ )  $\delta$  165.2, 154.9, 152.7, 139.3, 138.6, 135.3, 133.6, 131.2, 128.6, 125.1, 124.9, 82.8, 71.9, 61.1, 52.4, 27.7, 20.6, 15.0, 14.0. **HRMS(ESI)**  $m/z$ :  $[\text{M} + \text{Na}]^+$  calcd for  $\text{C}_{21}\text{H}_{29}\text{NNaO}_7^+$  430.1836; Found: 430.1831.



# General Procedure of Optimization and Substrate Scope

## General procedure 1 (GP1) for the synthesis of 3,4-dihydroquinazolinone

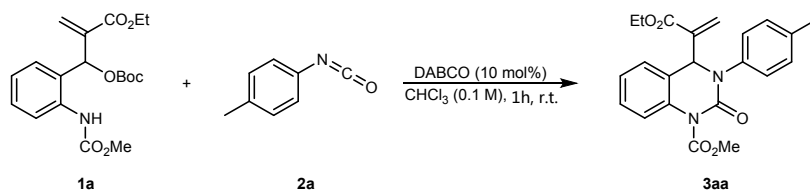

*o*-amino-acylation aryl MBH carbonate **1a** (0.1 mmol, 1.0 eq.) and isocyanate **2a** (0.2 mmol, 2.0 eq.) and CHCl<sub>3</sub> (0.5 mL) were added to a dry flask at room temperature, then DABCO (0.01 mmol, 0.1 eq.) in CHCl<sub>3</sub> (0.5 mL) was added to the above solution in one portion. This solution was stirred until the complete consumption of the starting materials monitored by TLC. After the removal of the solvent, the residue was purified by flash column chromatography (petroleum ether/ethyl acetate 3:1) to afford product **3aa**.

### 3.3. Optimization of intermolecular cycloaddition reaction conditions

Table S1 | Optimization of intermolecular cycloaddition on **1a** and **2a**

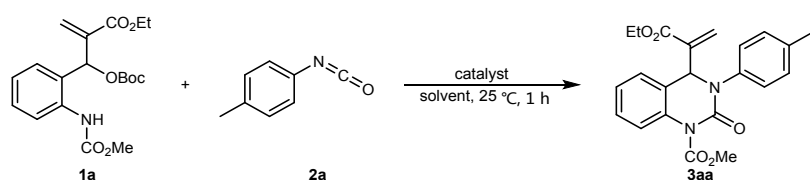

| Entry | 1a/2a | Solvent           | Catalyst          | Yield of 3aa (%) <sup>b</sup> |
|-------|-------|-------------------|-------------------|-------------------------------|
| 1     | 1:1   | CHCl <sub>3</sub> | —                 | no reaction                   |
| 2     | 1:1   | CHCl <sub>3</sub> | DABCO             | 63                            |
| 3     | 1:0.8 | CHCl <sub>3</sub> | DABCO             | 61                            |
| 4     | 1:1.2 | CHCl <sub>3</sub> | DABCO             | 72                            |
| 5     | 1:1.5 | CHCl <sub>3</sub> | DABCO             | 87                            |
| 6     | 1:2   | CHCl <sub>3</sub> | DABCO             | <b>96</b>                     |
| 7     | 1:2   | CHCl <sub>3</sub> | Et <sub>3</sub> N | mess                          |
| 8     | 1:2   | CHCl <sub>3</sub> | DMAP              | 87                            |
| 9     | 1:2   | CHCl <sub>3</sub> | DBU               | 92                            |
| 10    | 1:2   | CHCl <sub>3</sub> | quinine           | no reaction                   |
| 11    | 1:2   | CHCl <sub>3</sub> | PPh <sub>3</sub>  | no reaction                   |
| 12    | 1:2   | MeCN              | DABCO             | 94                            |
| 13    | 1:2   | toluene           | DABCO             | 93                            |
| 14    | 1:2   | EtOAc             | DABCO             | 94                            |
| 15    | 1:2   | THF               | DABCO             | no reaction                   |

<sup>a</sup> 1 mL, <sup>b</sup> 0.01 mmol, <sup>c</sup> Isolated yield.

## 4. Gram scale reactions and synthetic transformations

### Gram scale reactions

#### Synthesis of 3,4-dihydroquinazolinone **3ha**

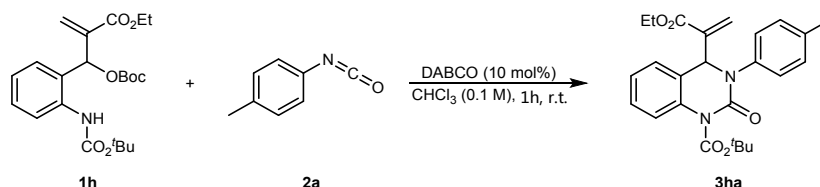

*o*-amino-acylation aryl MBH carbonate **1h** (1.69 g, 4 mmol, 1.0 eq.) and isocyanate **2a** (1.01 mL, 8 mmol, 2.0 eq.) and CHCl<sub>3</sub> (35 mL) were added to a 100 mL dry flask at room temperature, then DABCO (44.9 mg, 0.4 mmol, 0.1 eq.) in CHCl<sub>3</sub> (5 mL) was added to the above solution in one portion. The resulting solution of the reaction mixture was stirred at room temperature for 1 h. The solvent was evaporated to give the crude product, which was directly purified by flash chromatography (petroleum ether/ethyl acetate 6:1) to provide the desired product **3ha** as a white solid (1.55 g, 89% yield). The analytical data of the gram scale reaction of **3ha** are consistent with those of the 0.1 mmol scale experiment.

### 4.2. Synthetic transformations

#### **3ha** to **4a** (Removal of CO<sub>2</sub>tBu)

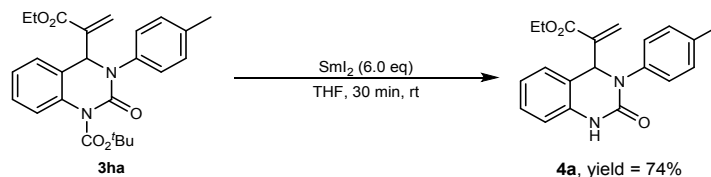

To a stirred solution of **3ha** (43.6 mg, 0.1 mmol, 1.0 eq.) in 3 mL THF was added SmI<sub>2</sub> (6 mL, 0.1 M in THF, 6.0 eq.) in one portion at room temperature. The resulting solution of the reaction mixture was stirred for 30 min then evaporated to give the crude product, which was purified by flash chromatography (petroleum ether/ethyl acetate 2:1) to provide the desired product **4a** (24.9 mg, 74% yield).

#### **3ha** to **4b** (Bromination/Removal of CO<sub>2</sub>tBu)

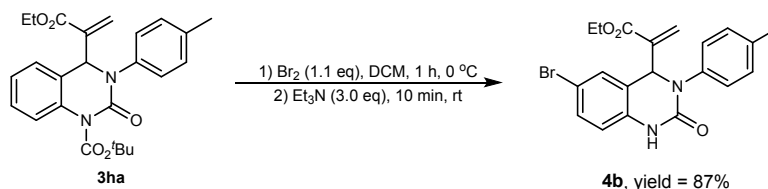

To a stirred solution of **3ha** (43.6 mg, 0.1 mmol, 1.0 eq.) in 1 mL DCM was added solution of Br<sub>2</sub> (5.6 μL, 0.11 mmol, 1.1 eq.) in 1 mL DCM dropwise at 0 °C. After stirred 1 h, Et<sub>3</sub>N (41.7 μL, 0.3 mmol, 3.0 eq.) was added in one portion. Then the reaction solution was allowed to gradually warm to room temperature and was stirred for 10 min. The solvent was evaporated to give the crude product, which was purified by flash chromatography (petroleum ether/ethyl acetate 2:1) to provide the desired product **4b** (36.1 mg, 89% yield).

#### **3ha** to **4c** (3+2 cycloaddition)

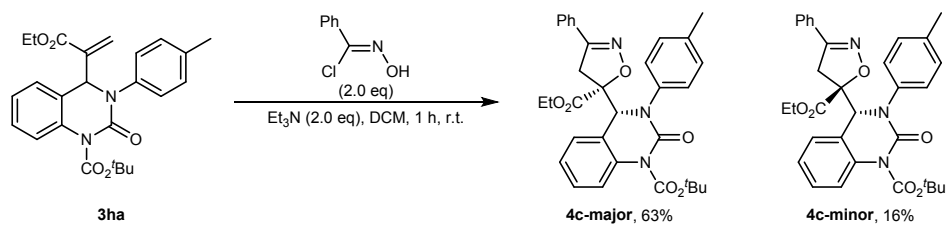

To a stirred solution of N-hydroxybenzimidoyl chloride (31.1 mg, 0.2 mmol, 2.0 eq.) in 1 mL DCM was added Et<sub>3</sub>N (27.8 μL, 0.2 mmol, 2.0 eq.) at room temperature. After stirred for 10 min, **3ha** (43.6 mg, 0.1 mmol, 1.0 eq.) in 1 mL DCM was added to the solution. The resulting mixture was stirred for 1 h then evaporated to give the crude product, which was purified by flash chromatography (petroleum ether/ethyl acetate 3:1) to provide the desired product **4c** (43.9 mg, 79% yield, d.r. = 4:1, separable).

## 5. Density Functional Theory (DFT) Calculations

### Computational Methods

Density functional theory (DFT) investigations were performed to delineate the detailed mechanism of the Lewis base-catalyzed [4+2] annulations of *o*-amino-acylation aryl MBH carbonates with isocyanates. All DFT calculations were carried out with the Gaussian 09 programs.<sup>4</sup> The geometry optimizations of the reactants, transition states, and products were performed with the M06-2X/6-31G(d) level.<sup>5</sup> The frequency calculations were carried out at the same level to conform that there was no imaginary frequency for ground state structures and only one imaginary frequency for transition state structures. The solvent (CHCl<sub>3</sub>) effects were considered by single point energy calculations on the gas-phase stationary points using M06-2X functional with the def2-TZVP<sup>6</sup> basis set in a SMD continuum solvation model. The energies given in this work are M06-2X calculated Gibbs free energies in CHCl<sub>3</sub> solvent noted on figures.<sup>7</sup> In addition, we utilized a correction of (n-m)\*1.89 kcal/mol for a process from m- to n-components to account for the Gibbs energy transition from gas to solution.

### 5.2. Calculated data

**Table S2** | The absolute calculation energies, enthalpies and free energies of [4+2] annulation.

| Geometry              | E <sub>(elec)</sub> <sup>1</sup> | E <sub>(solv)</sub> <sup>2</sup> | G <sub>(corr)</sub> <sup>3</sup> | H <sub>(corr)</sub> <sup>4</sup> | IF <sup>5</sup> |
|-----------------------|----------------------------------|----------------------------------|----------------------------------|----------------------------------|-----------------|
| <b>1b</b>             | -1280.262547                     | -1281.1411271                    | 0.344924                         | 0.431572                         |                 |
| <b>PhNCO</b>          | -399.491110                      | -399.730331266                   | 0.072798                         | 0.113236                         |                 |
| <b>CO<sub>2</sub></b> | -188.517761                      | -188.594609085                   | -0.008735                        | 0.015525                         |                 |
| <b>•BuO</b>           | -232.826769                      | -233.115475297                   | 0.093301                         | 0.129250                         |                 |
| <b>•BuOH</b>          | -233.442156                      | -233.660746667                   | 0.108428                         | 0.145078                         |                 |
| <b>DABCO</b>          | -345.018414                      | -345.313541488                   | 0.155886                         | 0.193762                         |                 |
| <b>INT1</b>           | -1203.291034                     | -1204.1723119                    | 0.384822                         | 0.463060                         |                 |
| <b>TS2</b>            | -1602.765875                     | -1603.91012163                   | 0.482940                         | 0.576777                         | -216.98         |
| <b>INT2</b>           | -1602.767490                     | -1603.92079617                   | 0.484075                         | 0.578424                         |                 |
| <b>TS3</b>            | -1602.763167                     | -1603.90599768                   | 0.484257                         | 0.577439                         | -224.95         |
| <b>INT3</b>           | -1602.797738                     | -1603.93890157                   | 0.488846                         | 0.580273                         |                 |
| <b>TS4</b>            | -1602.799239                     | -1603.93472055                   | 0.486787                         | 0.578380                         | -168.80         |
| <b>3</b>              | -1257.811614                     | -1258.62778561                   | 0.302854                         | 0.381959                         |                 |

<sup>1</sup>The electronic energy calculated by M06-2x/6-31G(d) level in gas phase. <sup>2</sup>The solvation energy corrections calculated at the M06-2x/def2-TZVP level with the SMD solvation model for acetonitrile minus electronic energy in gas phase. <sup>3</sup>The thermal correction to Gibbs free energy calculated by M06-2x/6-31G(d) level in gas phase. <sup>4</sup>The thermal correction to enthalpy calculated by M06-2x/6-31G(d) level in gas phase. <sup>5</sup>The M06-2x/6-31G(d) level calculated imaginary frequencies for the transition states.

---

<sup>4</sup> Gaussian 09, Revision D.01, M. J. Frisch, G. W. Trucks, H. B. Schlegel, G. E. Scuseria, M. A. Robb, J. R. Cheeseman, G. Scalmani, V. Barone, B. Mennucci, G. A. Petersson, H. Nakatsuji, M. Caricato, X. Li, H. P. Hratchian, A. F. Izmaylov, J. Bloino, G. Zheng, J. L. Sonnenberg, M. Hada, M. Ehara, K. Toyota, R. Fukuda, J. Hasegawa, M. Ishida, T. Nakajima, Y. Honda, O. Kitao, H. Nakai, T. Vreven, Jr. Montgomery, J. A.; J. E. Peralta, F. Ogliaro, M. Bearpark, J. J. Heyd, E. Brothers, K. N. Kudin, V. N. Staroverov, R. Kobayashi, J. Normand, K. Raghavachari, A. Rendell, J. C. Burant, S. S. Iyengar, J. Tomasi, M. Cossi, N. Rega, N. J. Millam, M. Klene, J. E. Knox, J. B. Cross, V. Bakken, C. Adamo, J. Jaramillo, R. Gomperts, R. E. Stratmann, O. Yazyev, A. J. Austin, R. Cammi, C. Pomelli, J. W. Ochterski, R. L. Martin, K. Morokuma, V. G. Zakrzewski, G. A. Voth, P. Salvador, J. J. Dannenberg, S. Dapprich, A. D. Daniels, Ö. Farkas, J. B. Foresman, J. V. Ortiz, J. Cioslowski and Fox, D. J. Gaussian, Inc., Wallingford CT, **2009**.

<sup>5</sup> (a) Y. Zhao and D. G. Truhlar, *Acc. Chem. Res.*, 2008, **41**, 157-167; (b) Y. Zhao and D. G. Truhlar, *Theor. Chem. Acc.*, 2008, **120**, 215-241; (c) A. D. Becke, *J. Chem. Phys.*, 1993, **98**, 5648-5652; (d) C. Lee, W. Yang and R. G. Parr, *Phys. Rev. B*, 1988, **37**, 785-789.

<sup>6</sup> F. Weigend and R. Ahlrichs, *Phys. Chem. Chem. Phys.*, 2005, **7**, 3297-305.

<sup>7</sup> A. V. Marenich, C. J. Cramer and D. G. Truhlar, *J. Phys. Chem. B*, 2009, **113**, 6378-6396.

## 6. Analytical Data

### DABCO catalyzed [4+2] cycloadducts 3

#### methyl 4-(3-ethoxy-3-oxoprop-1-en-2-yl)-2-oxo-3-(p-tolyl)-3,4-dihydroquinazoline-1(2H)-carboxylate (**3aa**)

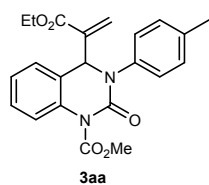

The reaction was conducted on a 0.1 mmol scale according to the GP2 and afforded dihydroquinazolinone **3aa** as white solid (37.8 mg, 96% yield, mp: 104-106 °C).  $R_f = 0.5$  (petroleum ether/ethyl acetate = 3:1).  $^1\text{H NMR}$  (400 MHz, Chloroform-*d*)  $\delta$  7.77 (dd,  $J = 8.2, 1.2$  Hz, 1H), 7.49 (dd,  $J = 7.6, 1.7$  Hz, 1H), 7.37 (td,  $J = 7.8, 1.6$  Hz, 1H), 7.23 – 7.15 (m, 5H), 6.40 (d,  $J = 1.1$  Hz, 1H), 6.07 (d,  $J = 1.6$  Hz, 1H), 5.68 (s, 1H), 4.25 – 4.07 (m, 2H), 3.91 (s, 3H), 2.34 (s, 3H), 1.26 (t,  $J = 7.2$  Hz, 3H).  $^{13}\text{C NMR}$  (101 MHz,  $\text{CDCl}_3$ )  $\delta$  165.2, 153.1, 151.9, 138.7, 138.0, 137.2, 135.3, 129.8, 128.4, 128.2, 126.8, 125.6, 125.3, 124.2, 123.1, 62.8, 61.4, 54.2, 21.1, 14.1. **HRMS(ESI)**  $m/z$ :  $[\text{M} + \text{H}]^+$  calcd for  $\text{C}_{22}\text{H}_{23}\text{N}_2\text{O}_5^+$  395.1602; Found: 395.1603.

#### methyl 4-(3-ethoxy-3-oxoprop-1-en-2-yl)-3-(4-methoxyphenyl)-2-oxo-3,4-dihydroquinazoline-1(2H)-carboxylate (**3ab**)

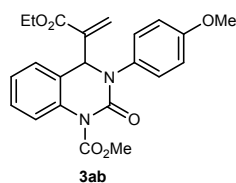

The reaction was conducted on a 0.1 mmol scale according to the GP2 and afforded dihydroquinazolinone **3ab** as white solid (40.6 mg, 99% yield, mp: 136-138 °C).  $R_f = 0.5$  (petroleum ether/ethyl acetate = 3:1).  $^1\text{H NMR}$  (400 MHz, Chloroform-*d*)  $\delta$  7.77 (dd,  $J = 8.2, 1.2$  Hz, 1H), 7.49 (dd,  $J = 7.6, 1.7$  Hz, 1H), 7.37 (td,  $J = 7.6, 1.6$  Hz, 1H), 7.26 – 7.15 (m, 3H), 6.95 – 6.81 (m, 2H), 6.40 (d,  $J = 1.1$  Hz, 1H), 6.07 (d,  $J = 1.5$  Hz, 1H), 5.65 (d,  $J = 1.2$  Hz, 1H), 4.26 – 4.06 (m, 2H), 3.91 (s, 3H), 3.79 (s, 3H), 1.26 (t,  $J = 7.2$  Hz, 3H).  $^{13}\text{C NMR}$  (101 MHz,  $\text{CDCl}_3$ )  $\delta$  165.2, 158.5, 153.1, 152.0, 138.0, 135.3, 134.1, 128.4, 128.2, 126.9, 126.8, 125.6, 124.2, 123.1, 114.4, 63.0, 61.4, 55.5, 54.1, 14.1. **HRMS(ESI)**  $m/z$ :  $[\text{M} + \text{H}]^+$  calcd for  $\text{C}_{22}\text{H}_{23}\text{N}_2\text{O}_6^+$  411.1551; Found: 411.1554.

#### methyl 4-(3-ethoxy-3-oxoprop-1-en-2-yl)-3-(4-fluorophenyl)-2-oxo-3,4-dihydroquinazoline-1(2H)-carboxylate (**3ac**)

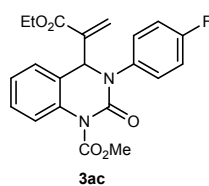

The reaction was conducted on a 0.1 mmol scale according to the GP2 and afforded dihydroquinazolinone **3ac** as colorless viscous oil (39.4 mg, 99% yield).  $R_f = 0.5$  (petroleum ether/ethyl acetate = 3:1).  $^1\text{H NMR}$  (400 MHz, Chloroform-*d*)  $\delta$  7.80 (d,  $J = 8.2$  Hz, 1H), 7.51 (d,  $J = 7.7$  Hz, 1H), 7.44 – 7.37 (m, 1H), 7.31 (dd,  $J = 9.0, 4.7$  Hz, 2H), 7.24 (t,  $J = 7.6$  Hz, 1H), 7.09 (t,  $J = 8.7$  Hz, 2H), 6.43 (s, 1H), 6.06 (s, 1H), 5.69 (s, 1H), 4.29 – 4.11 (m, 2H), 3.95 (s, 3H), 1.29 (t,  $J = 7.2$  Hz, 3H).  $^{13}\text{C NMR}$  (101 MHz,  $\text{CDCl}_3$ )  $\delta$  165.1, 161.2 (d,  $J = 247.5$  Hz), 153.0, 151.9, 137.9, 137.2, 135.2, 128.6, 127.9, 127.3 (d,  $J = 8.6$  Hz), 126.8, 125.7, 124.3, 123.0, 116.1 (d,  $J = 23.2$  Hz), 62.8, 61.5, 54.2, 14.1.  $^{19}\text{F NMR}$  (377 MHz, Chloroform-*d*)  $\delta$  -114.11 (dt,  $J = 13.9, 7.8$  Hz). **HRMS(ESI)**  $m/z$ :  $[\text{M} + \text{H}]^+$  calcd for  $\text{C}_{21}\text{H}_{20}\text{FN}_2\text{O}_5^+$  399.1351; Found: 399.1352.

#### methyl 3-(4-chlorophenyl)-4-(3-ethoxy-3-oxoprop-1-en-2-yl)-2-oxo-3,4-dihydroquinazoline-1(2H)-carboxylate (**3ad**)

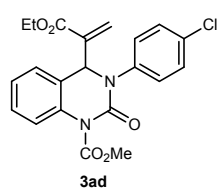

The reaction was conducted on a 0.1 mmol scale according to the GP2 and afforded dihydroquinazolinone **3ad** as colorless viscous oil (41 mg, 99% yield).  $R_f = 0.5$  (petroleum ether/ethyl acetate = 3:1).  $^1\text{H NMR}$  (400 MHz, Chloroform-*d*)  $\delta$  7.77 (dd,  $J = 8.3, 1.2$  Hz, 1H), 7.48 (dd,  $J = 7.6, 1.7$  Hz, 1H), 7.41 – 7.32 (m, 3H), 7.28 – 7.19 (m, 3H), 6.40 (d,  $J = 1.1$  Hz, 1H), 6.01 (d,  $J = 1.5$  Hz, 1H), 5.68 (d,  $J = 1.3$  Hz, 1H), 4.27 – 4.09 (m, 2H), 3.92 (s, 3H),

1.27 (t,  $J = 7.2$  Hz, 3H).  $^{13}\text{C}$  NMR (101 MHz,  $\text{CDCl}_3$ )  $\delta$  165.1, 152.9, 151.8, 139.7, 137.8, 135.1, 132.6, 129.3, 128.6, 127.7, 126.8, 126.6, 125.7, 124.3, 123.0, 62.5, 61.5, 54.3, 14.1. HRMS(ESI)  $m/z$ :  $[\text{M} + \text{H}]^+$  calcd for  $\text{C}_{21}\text{H}_{20}\text{ClN}_2\text{O}_5^+$  415.1055; Found: 415.1058.

**methyl 3-(4-bromophenyl)-4-(3-ethoxy-3-oxoprop-1-en-2-yl)-2-oxo-3,4-dihydroquinazoline-1(2H)-carboxylate (3ae)**

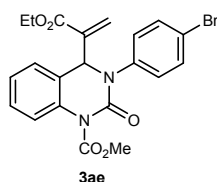

The reaction was conducted on a 0.1 mmol scale according to the GP2 and afforded dihydroquinazolinone **3ae** as colorless viscous oil (41.2 mg, 90% yield).  $R_f = 0.4$  (petroleum ether/ethyl acetate = 3:1).  $^1\text{H}$  NMR (400 MHz, Chloroform- $d$ )  $\delta$  7.77 (dd,  $J = 8.3, 1.0$  Hz, 1H), 7.52 – 7.45 (m, 3H), 7.38 (td,  $J = 7.8, 1.7$  Hz, 1H), 7.24 – 7.16 (m, 3H), 6.40 (d,  $J = 1.0$  Hz, 1H), 6.01 (d,  $J = 1.6$  Hz, 1H), 5.68 (s, 1H), 4.27 – 4.09 (m, 2H), 3.92 (s, 3H), 1.27 (t,  $J =$

7.2 Hz, 3H).  $^{13}\text{C}$  NMR (101 MHz,  $\text{CDCl}_3$ )  $\delta$  165.1, 152.9, 151.7, 140.2, 137.8, 135.0, 132.2, 128.6, 127.7, 126.9, 125.7, 124.3, 123.0, 120.5, 62.5, 61.5, 54.3, 14.1. HRMS(ESI)  $m/z$ :  $[\text{M} + \text{H}]^+$  calcd for  $\text{C}_{21}\text{H}_{20}\text{BrN}_2\text{O}_5^+$  459.0550; Found: 459.0547.

**methyl 3-(4-cyanophenyl)-4-(3-ethoxy-3-oxoprop-1-en-2-yl)-2-oxo-3,4-dihydroquinazoline-1(2H)-carboxylate (3af)**

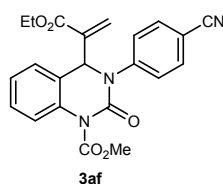

The reaction was conducted on a 0.1 mmol scale according to the GP2 and afforded dihydroquinazolinone **3af** as colorless viscous oil (38.9 mg, 96% yield).  $R_f = 0.5$  (petroleum ether/ethyl acetate = 3:1).  $^1\text{H}$  NMR (400 MHz, Chloroform- $d$ )  $\delta$  7.78 (d,  $J = 8.3$  Hz, 1H), 7.67 (d,  $J = 7.3$  Hz, 2H), 7.48 (dd,  $J = 15.7, 7.5$  Hz, 3H), 7.40 (t,  $J = 7.8$  Hz, 1H), 7.23 (t,  $J =$

7.6 Hz, 1H), 6.42 (s, 1H), 5.97 (s, 1H), 5.76 (s, 1H), 4.21 (dhept,  $J = 14.4, 7.5$  Hz, 2H), 3.93 (s, 3H), 1.29 (t,  $J = 7.5$  Hz, 3H).  $^{13}\text{C}$  NMR (101 MHz,  $\text{CDCl}_3$ )  $\delta$  164.9, 152.7, 151.6, 145.0, 137.5, 134.7, 133.8, 133.0, 128.9, 127.1, 127.0, 125.9, 124.9, 124.4, 122.8, 118.3, 114.4, 109.9, 61.9, 61.7, 54.4, 14.1. HRMS(ESI)  $m/z$ :  $[\text{M} + \text{H}]^+$  calcd for  $\text{C}_{22}\text{H}_{20}\text{N}_3\text{O}_5^+$  406.1398; Found: 406.1401.

**methyl 4-(3-ethoxy-3-oxoprop-1-en-2-yl)-2-oxo-3-(4-(trifluoromethoxy)phenyl)-3,4-dihydroquinazoline-1(2H)-carboxylate (3ag)**

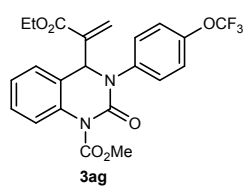

The reaction was conducted on a 0.1 mmol scale according to the GP2 and afforded dihydroquinazolinone **3ag** as colorless viscous oil (45.9 mg, 99% yield).  $R_f = 0.5$  (petroleum ether/ethyl acetate = 3:1).  $^1\text{H}$  NMR (400 MHz, Chloroform- $d$ )  $\delta$  7.80 (dd,  $J = 8.3, 1.2$  Hz, 1H), 7.51 (dd,  $J = 7.6, 1.7$  Hz, 1H), 7.43 – 7.34 (m, 3H), 7.27 – 7.20 (m, 3H), 6.43 (d,  $J =$

1.1 Hz, 1H), 6.04 (d,  $J = 1.5$  Hz, 1H), 5.72 (t,  $J = 1.3$  Hz, 1H), 4.30 – 4.11 (m, 2H), 3.94 (s, 3H), 1.29 (t,  $J = 7.2$  Hz, 3H).  $^{13}\text{C}$  NMR (101 MHz,  $\text{CDCl}_3$ )  $\delta$  165.1, 152.9, 151.8, 139.7, 137.8, 135.0, 128.6, 127.7, 126.8, 126.6, 125.7, 124.3, 122.9, 121.7, 119.1, 62.5, 61.5, 54.3, 14.0.  $^{19}\text{F}$  NMR (377 MHz, Chloroform- $d$ )  $\delta$  -57.97. HRMS(ESI)  $m/z$ :  $[\text{M} + \text{H}]^+$  calcd for  $\text{C}_{22}\text{H}_{20}\text{F}_3\text{N}_2\text{O}_6^+$  465.1268; Found: 465.1273.

**methyl 4-(3-ethoxy-3-oxoprop-1-en-2-yl)-3-(4-nitrophenyl)-2-oxo-3,4-dihydroquinazoline-1(2H)-carboxylate (3ah)**

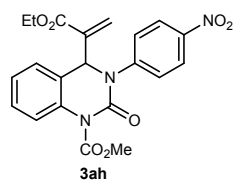

The reaction was conducted on a 0.1 mmol scale according to the GP2 and afforded dihydroquinazolinone **3ah** as colorless viscous oil (37 mg, 87% yield).  $R_f = 0.4$  (petroleum ether/ethyl acetate = 3:1).  $^1\text{H}$  NMR (400 MHz, Chloroform- $d$ )  $\delta$  8.24 (d,  $J = 8.4$  Hz, 2H), 7.79 (d,  $J = 8.2$  Hz, 1H), 7.51 (d,  $J = 8.5$  Hz, 3H), 7.41 (t,  $J = 7.7$  Hz, 1H), 7.24 (t,  $J = 7.4$  Hz, 1H), 6.43 (s, 1H), 5.98 (s, 1H), 5.81 (s, 1H), 4.21 (tt,  $J = 17.8, 8.9$  Hz, 2H), 3.94 (s, 3H),

1.29 (t,  $J = 7.0$  Hz, 3H).  $^{13}\text{C}$  NMR (101 MHz,  $\text{CDCl}_3$ )  $\delta$  164.9, 152.7, 151.6, 146.7, 145.3, 137.5, 134.7, 128.9, 127.0, 125.9, 124.7, 124.5, 124.4, 122.7, 61.9, 61.7, 54.4, 14.1. HRMS(ESI)  $m/z$ :  $[\text{M} + \text{H}]^+$  calcd for  $\text{C}_{21}\text{H}_{20}\text{N}_3\text{O}_7^+$  426.1296; Found: 426.1301.

**methyl 4-(3-ethoxy-3-oxoprop-1-en-2-yl)-2-oxo-3-(*m*-tolyl)-3,4-dihydroquinazoline-1(2H)-carboxylate (3ai)**

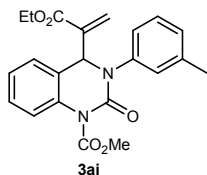

The reaction was conducted on a 0.1 mmol scale according to the GP2 and afforded dihydroquinazolinone **3ai** as colorless viscous oil (39 mg, 99% yield).  $R_f = 0.5$  (petroleum ether/ethyl acetate = 3:1).  $^1\text{H}$  NMR (400 MHz, Chloroform- $d$ )  $\delta$  7.78 (d,  $J = 8.1$  Hz, 1H), 7.50 (d,  $J = 7.0$  Hz, 1H), 7.41 – 7.34 (m, 1H), 7.24 (dt,  $J = 19.1, 7.6$  Hz, 2H), 7.15 – 7.07 (m, 3H), 6.42 (s, 1H), 6.14 – 6.02 (m, 1H), 5.70 (s, 1H), 4.26 – 4.09 (m, 2H), 3.92 (s, 3H), 2.34 (s, 3H),

1.26 (t,  $J = 7.1$  Hz, 3H).  $^{13}\text{C}$  NMR (101 MHz,  $\text{CDCl}_3$ )  $\delta$  165.2, 153.0, 152.0, 141.1, 139.2, 137.9, 135.2, 129.1, 128.5, 128.1, 126.9, 126.1, 125.6, 124.2, 123.1, 122.4, 62.8, 61.4, 54.2, 21.4, 14.1. HRMS(ESI)  $m/z$ :  $[\text{M} + \text{H}]^+$  calcd for  $\text{C}_{22}\text{H}_{23}\text{N}_2\text{O}_5^+$  395.1602; Found: 395.1607.

**methyl 4-(3-ethoxy-3-oxoprop-1-en-2-yl)-3-(3-methoxyphenyl)-2-oxo-3,4-dihydroquinazoline-1(2H)-carboxylate (3aj)**

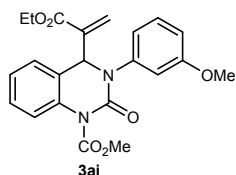

The reaction was conducted on a 0.1 mmol scale according to the GP2 and afforded dihydroquinazolinone **3aj** as colorless viscous oil (40.6 mg, 99% yield).  $R_f = 0.5$  (petroleum ether/ethyl acetate = 3:1).  $^1\text{H}$  NMR (400 MHz, Chloroform- $d$ )  $\delta$  7.78 (d,  $J = 7.8$  Hz, 1H), 7.49 (dd,  $J = 7.6, 1.2$  Hz, 1H), 7.37 (td,  $J = 8.2, 1.4$  Hz, 1H), 7.27 (ddd,  $J = 8.4, 5.5, 2.4$  Hz, 1H), 7.20 (td,  $J = 7.6, 1.0$  Hz, 1H), 6.92 – 6.85 (m, 2H), 6.84 – 6.79 (m, 1H), 6.44 – 6.37 (m,

1H), 6.07 (d,  $J = 1.4$  Hz, 1H), 5.71 (s, 1H), 4.27 – 4.09 (m, 2H), 3.92 (s, 3H), 3.78 (s, 3H), 1.27 (t,  $J = 7.1$  Hz, 3H).  $^{13}\text{C}$  NMR (101 MHz,  $\text{CDCl}_3$ )  $\delta$  165.1, 160.0, 153.0, 151.8, 142.3, 137.9, 135.2, 129.9, 128.5, 128.1, 126.9, 125.6, 124.2, 123.0, 117.3, 112.7, 111.4, 62.7, 61.4, 55.4, 54.2, 14.1. HRMS(ESI)  $m/z$ :  $[\text{M} + \text{H}]^+$  calcd for  $\text{C}_{22}\text{H}_{23}\text{N}_2\text{O}_6^+$  411.1551; Found: 411.1554.

**methyl 4-(3-ethoxy-3-oxoprop-1-en-2-yl)-3-(3-fluorophenyl)-2-oxo-3,4-dihydroquinazoline-1(2H)-carboxylate (3ak)**

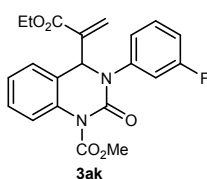

The reaction was conducted on a 0.1 mmol scale according to the GP2 and afforded dihydroquinazolinone **3ak** as colorless viscous oil (36.6 mg, 92% yield).  $R_f = 0.5$  (petroleum ether/ethyl acetate = 3:1).  $^1\text{H}$  NMR (400 MHz, Chloroform- $d$ )  $\delta$  7.78 (d,  $J = 8.2$  Hz, 1H), 7.49 (d,  $J = 7.5$  Hz, 1H), 7.35 (dt,  $J = 22.8, 7.9$  Hz, 2H), 7.21 (t,  $J = 7.5$  Hz, 1H), 7.13 – 7.04 (m, 2H), 6.98 (t,  $J = 8.2$  Hz, 1H), 6.41 (s, 1H), 6.02 (s, 1H), 5.72 (s, 1H), 4.28 – 4.10 (m, 2H), 3.92

(s, 3H), 1.27 (t,  $J = 7.1$  Hz, 3H).  $^{13}\text{C}$  NMR (101 MHz,  $\text{CDCl}_3$ )  $\delta$  165.1, 162.7 (d,  $J = 247.0$  Hz), 152.9, 151.7, 142.5 (d,  $J = 10.0$  Hz), 137.8, 135.0, 130.2 (d,  $J = 9.2$  Hz), 128.6, 127.7, 126.9, 125.7, 124.3, 122.9, 120.6 (d,  $J = 3.1$  Hz), 114.0 (d,  $J = 21.0$  Hz), 112.8 (d,  $J = 24.1$  Hz), 62.5, 61.5, 54.3, 14.0.  $^{19}\text{F}$  NMR (377 MHz, Chloroform- $d$ )  $\delta$  -111.19 (q,  $J = 8.1$  Hz). HRMS(ESI)  $m/z$ :  $[\text{M} + \text{H}]^+$  calcd for  $\text{C}_{21}\text{H}_{20}\text{FN}_2\text{O}_5^+$  399.1351; Found: 399.1350.

**methyl 3-(3-chlorophenyl)-4-(3-ethoxy-3-oxoprop-1-en-2-yl)-2-oxo-3,4-dihydroquinazoline-1(2H)-carboxylate (3al)**

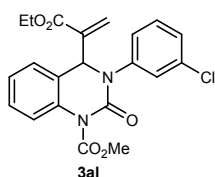

The reaction was conducted on a 0.1 mmol scale according to the GP2 and afforded dihydroquinazolinone **3al** as colorless viscous oil (38.1 mg, 92% yield).  $R_f = 0.5$  (petroleum ether/ethyl acetate = 3:1).  $^1\text{H}$  NMR (400 MHz, Chloroform- $d$ )  $\delta$  7.80 (d,  $J = 8.2$  Hz, 1H), 7.52 (d,  $J = 7.5$  Hz, 1H), 7.41 (t,  $J = 7.7$  Hz, 1H), 7.36 (s, 1H), 7.32 (d,  $J = 7.9$  Hz, 1H), 7.28 (s,



1H), 7.24 (t,  $J = 7.7$  Hz, 2H), 6.44 (s, 1H), 6.04 (s, 1H), 5.72 (s, 1H), 4.21 (dtt,  $J = 22.7, 7.2, 3.7$  Hz, 2H), 3.95 (s, 3H), 1.29 (t,  $J = 7.1$  Hz, 3H).  $^{13}\text{C}$  NMR (101 MHz,  $\text{CDCl}_3$ )  $\delta$  165.1, 152.9, 151.7, 142.2, 137.7, 135.0, 134.6, 130.1, 128.6, 127.7, 127.3, 126.9, 125.7, 125.6, 124.4, 123.4, 123.0, 62.5, 61.5, 54.3, 14.1. HRMS(ESI)  $m/z$ :  $[\text{M} + \text{H}]^+$  calcd for  $\text{C}_{21}\text{H}_{20}\text{ClN}_2\text{O}_5^+$  415.1055; Found: 415.1059.

**methyl 4-(3-ethoxy-3-oxoprop-1-en-2-yl)-2-oxo-3-(o-tolyl)-3,4-dihydroquinazoline-1(2H)-carboxylate (3am)**

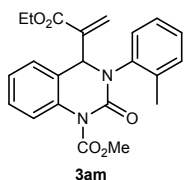

The reaction was conducted on a 0.1 mmol scale according to the GP2 and afforded dihydroquinazolinone **3am** as white solid (35.9 mg, 91% yield, d.r. = 6:1, mp: 155-157 °C).  $R_f = 0.5$  (petroleum ether/ethyl acetate = 3:1).  $^1\text{H}$  NMR (400 MHz, Chloroform- $d$ )  $\delta$  7.80 (t,  $J = 8.5$  Hz, 1H), 7.49 (d,  $J = 7.4$  Hz, 1H), 7.43 – 7.33 (m, 1H), 7.31 – 7.17 (m, 6H), 6.48 (s, 1H), 6.35 (s, 0H), 6.28 – 6.19 (m, 1H), 5.76 (s, 0H), 5.73 (s, 0H), 5.44 (s, 1H), 4.27 – 4.08 (m, 2H), 3.93

(s, 3H), 2.32 (s, 0H), 1.97 (s, 3H), 1.26 (t,  $J = 7.1$  Hz, 3H), 1.13 (q,  $J = 9.3, 8.2$  Hz, 1H).  $^{13}\text{C}$  NMR (101 MHz,  $\text{CDCl}_3$ )  $\delta$  165.2, 153.0, 151.6, 140.1, 138.2, 135.3, 134.9, 131.4, 128.5, 128.5, 128.4, 127.5, 126.9, 126.6, 125.6, 124.2, 123.1, 62.5, 61.4, 54.1, 17.9, 14.0. (Only one set of diastereoisomer peaks is labeled). HRMS(ESI)  $m/z$ :  $[\text{M} + \text{H}]^+$  calcd for  $\text{C}_{22}\text{H}_{23}\text{N}_2\text{O}_5^+$  395.1602; Found: 395.1597.

**methyl 3-(2-bromophenyl)-4-(3-ethoxy-3-oxoprop-1-en-2-yl)-2-oxo-3,4-dihydroquinazoline-1(2H)-carboxylate (3an)**

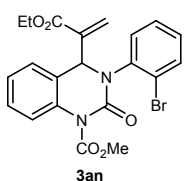

The reaction was conducted on a 0.1 mmol scale according to the GP2 and afforded dihydroquinazolinone **3an** as white solid (42.6 mg, 93% yield, d.r. = 10:1, mp: 220-222 °C).  $R_f = 0.5$  (petroleum ether/ethyl acetate = 3:1).  $^1\text{H}$  NMR (400 MHz, Chloroform- $d$ )  $\delta$  7.80 (d,  $J = 8.3$  Hz, 1H), 7.67 (d,  $J = 8.0$  Hz, 1H), 7.49 (d,  $J = 7.6$  Hz, 1H), 7.39 (dt,  $J = 13.3, 7.6$  Hz, 3H), 7.24 (q,  $J = 8.4, 7.7$  Hz, 2H), 6.45 (s, 1H), 6.41 (s, 0H), 6.13 (s, 1H), 5.78 (s, 0H), 5.73 (s, 0H),

5.55 (s, 1H), 4.17 (qt,  $J = 14.4, 7.2$  Hz, 2H), 3.95 (s, 3H), 1.26 (t,  $J = 7.1$  Hz, 3H), 1.17 (t,  $J = 7.1$  Hz, 0H).  $^{13}\text{C}$  NMR (101 MHz,  $\text{CDCl}_3$ )  $\delta$  165.2, 153.0, 151.4, 139.8, 138.2, 135.1, 133.8, 130.6, 129.9, 128.3, 128.3, 126.8, 125.6, 124.6, 122.9, 122.3, 62.2, 61.4, 54.2, 14.0. (Only one set of diastereoisomer peaks is labeled). HRMS(ESI)  $m/z$ :  $[\text{M} + \text{H}]^+$  calcd for  $\text{C}_{21}\text{H}_{20}\text{BrN}_2\text{O}_5^+$  459.0550; Found: 459.0550.

**methyl 3-([1,1'-biphenyl]-2-yl)-4-(3-ethoxy-3-oxoprop-1-en-2-yl)-2-oxo-3,4-dihydroquinazoline-1(2H)-carboxylate (3ao)**

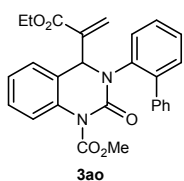

The reaction was conducted on a 0.1 mmol scale according to the GP2 and afforded dihydroquinazolinone **3ao** as white solid (43.8 mg, 96% yield, d.r. = 10:1, mp: 114-116 °C).  $R_f = 0.5$  (petroleum ether/ethyl acetate = 3:1).  $^1\text{H}$  NMR (400 MHz, Chloroform- $d$ )  $\delta$  7.61 (d,  $J = 8.2$  Hz, 1H), 7.46 (s, 1H), 7.43 (q,  $J = 5.5, 4.9$  Hz, 3H), 7.23 (t,  $J = 7.7$  Hz, 1H), 7.09 (d,  $J = 7.2$  Hz, 2H), 6.98 (ddt,  $J = 22.0, 14.9, 7.4$  Hz, 4H), 6.76 (d,  $J = 7.4$  Hz, 1H), 6.65 (d,  $J = 7.9$  Hz, 0H),

6.37 (s, 1H), 6.21 (s, 0H), 6.06 (s, 1H), 5.70 (s, 0H), 5.16 (s, 1H), 4.19 – 4.02 (m, 2H), 3.92 (s, 3H), 1.28 (s, 0H), 1.21 (t,  $J = 7.1$  Hz, 3H).  $^{13}\text{C}$  NMR (101 MHz,  $\text{CDCl}_3$ )  $\delta$  165.2, 152.9, 152.0, 139.6, 138.7, 138.0, 137.6, 134.5, 131.1, 129.3, 128.6, 128.6, 128.3, 128.2, 128.1, 127.7, 127.6, 126.4, 125.2, 124.1, 123.0, 62.6, 61.2, 54.0, 14.0. (Only one set of diastereoisomer peaks is labeled). HRMS(ESI)  $m/z$ :  $[\text{M} + \text{H}]^+$  calcd for  $\text{C}_{27}\text{H}_{25}\text{N}_2\text{O}_5^+$  457.1758; Found: 457.1762.

**methyl 4-(3-ethoxy-3-oxoprop-1-en-2-yl)-3-(naphthalen-1-yl)-2-oxo-3,4-dihydroquinazoline-1(2H)-carboxylate (3ap)**

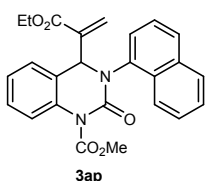

The reaction was conducted on a 0.1 mmol scale according to the GP2 and afforded

dihydroquinazolinone **3ap** as white solid (38.3 mg, 89% yield, d.r. = 8:1, mp: 161-163 °C).  $R_f$  = 0.5 (petroleum ether/ethyl acetate = 3:1).  $^1\text{H NMR}$  (400 MHz, Chloroform-*d*)  $\delta$  7.87 (q,  $J$  = 8.6 Hz, 4H), 7.49 (tt,  $J$  = 15.3, 7.4 Hz, 6H), 7.36 (t,  $J$  = 7.6 Hz, 1H), 7.30 (d,  $J$  = 10.0 Hz, 3H), 6.49 (s, 1H), 6.35 (s, 0H), 6.29 (s, 1H), 5.83 (s, 0H), 5.65 (s, 0H), 5.58 (s, 1H), 4.23 – 4.03 (m, 2H), 3.96 (d,  $J$  = 7.1 Hz, 3H), 1.21 (t,  $J$  = 7.1 Hz, 3H), 0.80 (t,  $J$  = 7.1 Hz, 0H).  $^{13}\text{C NMR}$  (101 MHz,  $\text{CDCl}_3$ )  $\delta$  165.2, 153.2, 152.2, 138.2, 137.1, 135.5, 134.9, 129.1, 129.1, 128.8, 128.6, 128.3, 127.3, 126.9, 126.5, 126.4, 125.8, 125.4, 124.4, 123.2, 122.0, 62.7, 61.4, 54.2, 14.0 (Only one set of diastereoisomer peaks is labeled). **HRMS(ESI)**  $m/z$ :  $[\text{M} + \text{H}]^+$  calcd for  $\text{C}_{25}\text{H}_{23}\text{N}_2\text{O}_5^+$  431.1602; Found: 431.1605.

**methyl 3-(4-chloro-3-(trifluoromethyl)phenyl)-4-(3-ethoxy-3-oxoprop-1-en-2-yl)-2-oxo-3,4-dihydroquinazoline-1(2H)-carboxylate (3aq)**

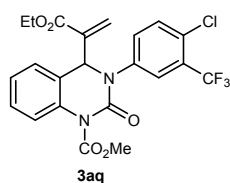

The reaction was conducted on a 0.1 mmol scale according to the GP2 and afforded dihydroquinazolinone **3aq** as colorless viscous oil (44.8 mg, 93% yield).  $R_f$  = 0.4 (petroleum ether/ethyl acetate = 3:1).  $^1\text{H NMR}$  (400 MHz, Chloroform-*d*)  $\delta$  7.78 (d,  $J$  = 8.2 Hz, 1H), 7.66 (d,  $J$  = 2.3 Hz, 1H), 7.50 (t,  $J$  = 8.9 Hz, 2H), 7.46 – 7.37 (m, 2H), 7.24 (t,  $J$  = 7.5 Hz, 1H), 6.42 (s, 1H), 5.97 (s, 1H), 5.70 (s, 1H), 4.29 – 4.10 (m, 2H), 3.93 (s, 3H), 1.28 (t,  $J$  = 7.1 Hz, 3H).  $^{13}\text{C NMR}$  (101 MHz,  $\text{CDCl}_3$ )  $\delta$  165.0, 152.8, 151.7, 139.8, 134.9, 132.1, 130.4, 129.3 (d,  $J$  = 14.3 Hz), 129.3 – 128.9 (m), 128.8, 127.2, 126.8, 125.9, 124.5 (d,  $J$  = 4.4 Hz), 122.9, 62.2, 61.6, 54.4, 14.0.  $^{19}\text{F NMR}$  (377 MHz, Chloroform-*d*)  $\delta$  -62.88. **HRMS(ESI)**  $m/z$ :  $[\text{M} + \text{H}]^+$  calcd for  $\text{C}_{22}\text{H}_{19}\text{ClF}_3\text{N}_2\text{O}_5^+$  483.0929; Found: 483.0932.

**methyl 3-(2,6-difluorophenyl)-4-(3-ethoxy-3-oxoprop-1-en-2-yl)-2-oxo-3,4-dihydroquinazoline-1(2H)-carboxylate (3ar)**

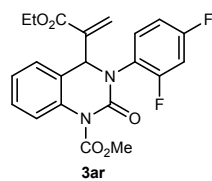

The reaction was conducted on a 0.1 mmol scale according to the GP2 and afforded dihydroquinazolinone **3ar** as colorless viscous oil (30.4 mg, 73% yield).  $R_f$  = 0.5 (petroleum ether/ethyl acetate = 3:1).  $^1\text{H NMR}$  (400 MHz, Chloroform-*d*)  $\delta$  7.78 (d,  $J$  = 8.1 Hz, 1H), 7.39 (ddd,  $J$  = 34.4, 15.4, 7.7 Hz, 3H), 7.25 (t,  $J$  = 7.4 Hz, 1H), 6.93 (t,  $J$  = 8.3 Hz, 2H), 6.41 (s, 1H), 5.99 (s, 1H), 5.58 (s, 1H), 4.28 – 4.08 (m, 2H), 3.96 (s, 3H), 1.27 (t,  $J$  = 7.0 Hz, 3H).  $^{13}\text{C NMR}$  (101 MHz,  $\text{CDCl}_3$ )  $\delta$  165.2, 163.5 – 156.5 (m), 152.9, 151.3, 137.9, 135.2, 130.0 (d,  $J$  = 10.1 Hz), 128.6, 127.7, 126.5, 125.7, 125.0, 122.9, 111.8 (d,  $J$  = 18.9 Hz), 105.9 – 104.6 (m), 62.6, 61.4, 54.3, 14.0.  $^{19}\text{F NMR}$  (377 MHz, Chloroform-*d*)  $\delta$  -108.78 (p,  $J$  = 7.7 Hz), -113.26. **HRMS(ESI)**  $m/z$ :  $[\text{M} + \text{H}]^+$  calcd for  $\text{C}_{21}\text{H}_{19}\text{F}_2\text{N}_2\text{O}_5^+$  417.1257; Found: 417.1260.

**methyl 3-benzyl-4-(3-ethoxy-3-oxoprop-1-en-2-yl)-2-oxo-3,4-dihydroquinazoline-1(2H)-carboxylate (3as)**

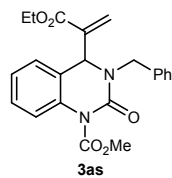

The reaction was conducted on a 0.1 mmol scale according to the GP2 and afforded dihydroquinazolinone **3as** as white solid (25.2 mg, 64% yield, mp: 64-66 °C).  $R_f$  = 0.5 (petroleum ether/ethyl acetate = 3:1).  $^1\text{H NMR}$  (400 MHz, Chloroform-*d*)  $\delta$  7.71 (d,  $J$  = 8.1 Hz, 1H), 7.35 – 7.29 (m, 1H), 7.28 – 7.23 (m, 3H), 7.22 – 7.19 (m, 1H), 7.18 – 7.14 (m, 2H), 7.14 – 7.08 (m, 1H), 6.24 (s, 1H), 5.67 (d,  $J$  = 1.2 Hz, 1H), 5.24 (d,  $J$  = 15.1 Hz, 2H), 4.25 – 4.12 (m, 3H), 3.92 (s, 3H), 1.27 (t,  $J$  = 7.1 Hz, 3H).  $^{13}\text{C NMR}$  (101 MHz,  $\text{CDCl}_3$ )  $\delta$  165.5, 153.1, 152.8, 137.5, 135.8, 135.4, 128.7, 128.2, 128.0, 127.8, 127.8, 126.4, 125.5, 124.6, 122.8, 61.3, 57.8, 54.1, 50.7, 14.1. **HRMS(ESI)**  $m/z$ :  $[\text{M} + \text{H}]^+$  calcd for  $\text{C}_{22}\text{H}_{23}\text{N}_2\text{O}_5^+$  395.1601; Found: 395.1604.

**methyl 3-(2-butoxy-2-oxoethyl)-4-(3-ethoxy-3-oxoprop-1-en-2-yl)-2-oxo-3,4-dihydroquinazoline-1(2H)-carboxylate (3at)**

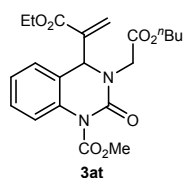

The reaction was conducted on a 0.1 mmol scale according to the GP2 and afforded

dihydroquinazolinone **3at** as colorless viscous oil (37.2 mg, 89% yield).  $R_f = 0.5$  (petroleum ether/ethyl acetate = 6:1).  $^1\text{H NMR}$  (400 MHz, Chloroform-*d*)  $\delta$  7.72 (d,  $J = 8.2$  Hz, 1H), 7.39 – 7.33 (m, 1H), 7.30 (d,  $J = 7.4$  Hz, 1H), 7.20 (t,  $J = 7.4$  Hz, 1H), 6.30 (s, 1H), 5.56 (s, 1H), 5.35 (s, 1H), 4.23 (q,  $J = 6.9$  Hz, 2H), 4.14 – 3.99 (m, 3H), 3.89 (s, 3H), 1.48 (dt,  $J = 13.3, 6.6$  Hz, 2H), 1.31 (t,  $J = 7.1$  Hz, 3H), 1.23 (dq,  $J = 15.0, 7.6$  Hz, 3H), 0.85 (t,  $J = 7.4$  Hz, 3H).  $^{13}\text{C NMR}$  (101 MHz,  $\text{CDCl}_3$ )  $\delta$  168.6, 165.8, 152.9, 152.3, 137.7, 135.4, 128.3, 127.9, 126.2, 126.0, 125.7, 123.1, 65.3, 61.5, 60.0, 54.1, 49.7, 30.4, 18.9, 14.1, 13.6. **HRMS(ESI)**  $m/z$ :  $[\text{M} + \text{Na}]^+$  calcd for  $\text{C}_{21}\text{H}_{26}\text{N}_2\text{NaO}_7^+$  441.1632; Found: 441.1628

**methyl 4-(3-methoxy-3-oxoprop-1-en-2-yl)-2-oxo-3-(p-tolyl)-3,4-dihydroquinazoline-1(2H)-carboxylate (3ba)**

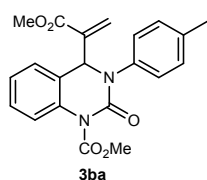

The reaction was conducted on a 0.1 mmol scale according to the GP2 and afforded dihydroquinazolinone **3ba** as white solid (34.6 mg, 91% yield, mp: 102-104 °C).  $R_f = 0.5$  (petroleum ether/ethyl acetate = 3:1).  $^1\text{H NMR}$  (400 MHz, Chloroform-*d*)  $\delta$  7.79 (d,  $J = 8.2$  Hz, 1H), 7.50 (d,  $J = 7.4$  Hz, 1H), 7.39 (t,  $J = 7.8$  Hz, 1H), 7.21 (d,  $J = 9.5$  Hz, 5H), 6.42 (s, 1H), 6.11 (s, 1H), 5.70 (s, 1H), 3.93 (s, 3H), 3.74 (s, 3H), 2.36 (s, 3H).  $^{13}\text{C NMR}$  (101 MHz,  $\text{CDCl}_3$ )  $\delta$  165.6, 153.0, 151.9, 138.7, 137.7, 137.1, 135.3, 129.8, 128.4, 128.2, 126.8, 125.6, 125.2, 124.4, 123.1, 62.8, 54.1, 52.2, 21.1. **HRMS(ESI)**  $m/z$ :  $[\text{M} + \text{H}]^+$  calcd for  $\text{C}_{21}\text{H}_{21}\text{N}_2\text{O}_5^+$  381.1445; Found: 381.1449.

**methyl 4-(3-butoxy-3-oxoprop-1-en-2-yl)-2-oxo-3-(p-tolyl)-3,4-dihydroquinazoline-1(2H)-carboxylate (3ca)**

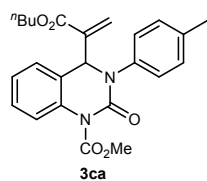

The reaction was conducted on a 0.1 mmol scale according to the GP2 and afforded dihydroquinazolinone **3ca** as colorless viscous oil (41.8 mg, 99% yield).  $R_f = 0.5$  (petroleum ether/ethyl acetate = 3:1).  $^1\text{H NMR}$  (400 MHz, Chloroform-*d*)  $\delta$  7.80 (d,  $J = 7.9$  Hz, 1H), 7.51 (d,  $J = 7.2$  Hz, 1H), 7.39 (t,  $J = 7.3$  Hz, 1H), 7.21 (s, 5H), 6.41 (s, 1H), 6.09 (s, 1H), 5.71 (s, 1H), 4.23 – 4.05 (m, 2H), 3.94 (s, 3H), 2.36 (s, 3H), 1.68 – 1.56 (m, 2H), 1.43 – 1.31 (m, 2H), 0.94 (t,  $J = 7.1$  Hz, 3H).  $^{13}\text{C NMR}$  (101 MHz,  $\text{CDCl}_3$ )  $\delta$  165.3, 153.1, 151.9, 138.7, 138.0, 137.1, 135.3, 129.8, 128.4, 128.2, 126.8, 125.6, 125.2, 124.0, 123.1, 65.2, 62.8, 54.1, 30.5, 21.1, 19.1, 13.7. **HRMS(ESI)**  $m/z$ :  $[\text{M} + \text{H}]^+$  calcd for  $\text{C}_{24}\text{H}_{27}\text{N}_2\text{O}_5^+$  423.1915; Found: 423.1922.

**methyl 4-(3-isobutoxy-3-oxoprop-1-en-2-yl)-2-oxo-3-(p-tolyl)-3,4-dihydroquinazoline-1(2H)-carboxylate (3da)**

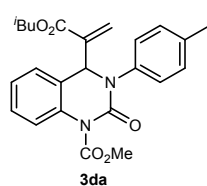

The reaction was conducted on a 0.1 mmol scale according to the GP2 and afforded dihydroquinazolinone **3da** as colorless viscous oil (32.1 mg, 76% yield).  $R_f = 0.5$  (petroleum ether/ethyl acetate = 6:1).  $^1\text{H NMR}$  (400 MHz, Chloroform-*d*)  $\delta$  7.78 (d,  $J = 8.2$  Hz, 1H), 7.49 (d,  $J = 7.5$  Hz, 1H), 7.37 (t,  $J = 7.7$  Hz, 1H), 7.23 – 7.13 (m, 5H), 6.39 (s, 1H), 6.08 (s, 1H), 5.69 (s, 1H), 3.97 – 3.82 (m, 5H), 2.34 (s, 3H), 1.93 (dp,  $J = 13.3, 6.7$  Hz, 1H), 0.95 – 0.88 (m, 6H).  $^{13}\text{C NMR}$  (101 MHz,  $\text{CDCl}_3$ )  $\delta$  165.2, 153.1, 151.9, 138.7, 138.1, 137.1, 135.3, 129.8, 128.4, 128.2, 126.9, 125.6, 125.2, 123.9, 123.0, 71.4, 62.8, 54.1, 27.7, 21.1, 19.1, 19.1. **HRMS(ESI)**  $m/z$ :  $[\text{M} + \text{H}]^+$  calcd for  $\text{C}_{24}\text{H}_{27}\text{N}_2\text{O}_5^+$  423.1915; Found: 423.1917.

**methyl 4-(3-(tert-butoxy)-3-oxoprop-1-en-2-yl)-2-oxo-3-(p-tolyl)-3,4-dihydroquinazoline-1(2H)-carboxylate (3ea)**

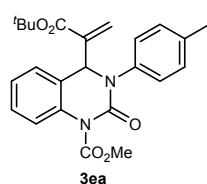

The reaction was conducted on a 0.1 mmol scale according to the GP2 and afforded dihydroquinazolinone **3ea** as white solid (38.8 mg, 92% yield, mp: 83-85 °C).  $R_f = 0.5$  (petroleum ether/ethyl acetate = 6:1).  $^1\text{H NMR}$  (400 MHz, Chloroform-*d*)  $\delta$  7.82 (d,  $J = 8.2$  Hz, 1H), 7.51 (d,  $J = 7.5$  Hz, 1H), 7.39 (t,  $J = 7.7$  Hz, 1H), 7.23 (d,  $J = 8.7$  Hz, 5H), 6.29 (s,

1H), 5.99 (s, 1H), 5.70 (s, 1H), 3.95 (s, 3H), 2.37 (s, 3H), 1.47 (s, 9H). <sup>13</sup>C NMR (101 MHz, CDCl<sub>3</sub>) δ 164.5, 153.2, 151.9, 139.3, 138.8, 137.0, 135.3, 129.8, 128.4, 128.3, 126.6, 125.4, 125.4, 123.0, 82.1, 62.7, 54.1, 28.0, 21.1. HRMS(ESI) m/z: [M + H]<sup>+</sup> calcd for C<sub>24</sub>H<sub>27</sub>N<sub>2</sub>O<sub>5</sub><sup>+</sup> 423.1915; Found: 423.1916.

**methyl 4-(3-(benzyloxy)-3-oxoprop-1-en-2-yl)-2-oxo-3-(p-tolyl)-3,4-dihydroquinazoline-1(2H)-carboxylate (3fa)**

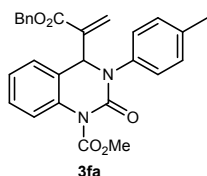

The reaction was conducted on a 0.1 mmol scale according to the GP2 and afforded dihydroquinazolinone **3fa** as colorless viscous oil (21.9 mg, 48% yield). R<sub>f</sub> = 0.5 (petroleum ether/ethyl acetate = 6:1). <sup>1</sup>H NMR (400 MHz, Chloroform-*d*) δ 7.77 (d, *J* = 8.1 Hz, 1H), 7.41 (d, *J* = 7.6 Hz, 1H), 7.35 (d, *J* = 6.9 Hz, 4H), 7.32 – 7.28 (m, 2H), 7.25 (s, 1H), 7.16 (d, *J* = 5.9 Hz, 5H), 6.44 (s, 1H), 6.09 (s, 1H), 5.68 (s, 1H), 5.22 (d, *J* = 12.2 Hz, 1H), 5.06 (d, *J* = 12.2

Hz, 1H), 3.90 (s, 3H), 2.33 (s, 3H). <sup>13</sup>C NMR (101 MHz, CDCl<sub>3</sub>) δ 165.0, 153.1, 151.9, 138.7, 137.8, 137.2, 135.3, 135.2, 129.8, 129.5, 128.7, 128.5, 128.4, 128.1, 126.9, 125.6, 125.3, 124.7, 123.0, 67.2, 62.9, 54.1, 21.1. HRMS(ESI) m/z: [M + H]<sup>+</sup> calcd for C<sub>27</sub>H<sub>25</sub>N<sub>2</sub>O<sub>5</sub><sup>+</sup> 457.1758; Found: 457.1762.

**ethyl 4-(3-ethoxy-3-oxoprop-1-en-2-yl)-2-oxo-3-(p-tolyl)-3,4-dihydroquinazoline-1(2H)-carboxylate (3ga)**

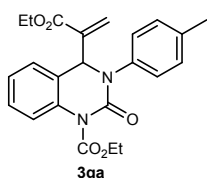

The reaction was conducted on a 0.1 mmol scale according to the GP2 and afforded dihydroquinazolinone **3ga** as colorless viscous oil (40.4 mg, 99% yield). R<sub>f</sub> = 0.5 (petroleum ether/ethyl acetate = 3:1). <sup>1</sup>H NMR (400 MHz, Chloroform-*d*) δ 7.80 (d, *J* = 8.2 Hz, 1H), 7.50 (d, *J* = 7.4 Hz, 1H), 7.38 (t, *J* = 7.8 Hz, 1H), 7.22 (d, *J* = 9.0 Hz, 5H), 6.43 (s, 1H), 6.12 (s, 1H), 5.70 (s, 1H), 4.48 – 4.30 (m, 2H), 4.28 – 4.12 (m, 2H), 2.36 (s, 3H), 1.38 (t, *J* = 7.1 Hz,

3H), 1.29 (t, *J* = 7.1 Hz, 3H). <sup>13</sup>C NMR (101 MHz, CDCl<sub>3</sub>) δ 165.2, 152.5, 152.0, 138.8, 138.1, 137.0, 135.3, 129.7, 128.4, 128.2, 126.8, 125.4, 125.0, 124.1, 123.0, 63.4, 62.7, 61.4, 21.0, 14.3, 14.1. HRMS(ESI) m/z: [M + H]<sup>+</sup> calcd for C<sub>23</sub>H<sub>25</sub>N<sub>2</sub>O<sub>5</sub><sup>+</sup> 409.1758; Found: 409.1760.

**tert-butyl 4-(3-ethoxy-3-oxoprop-1-en-2-yl)-2-oxo-3-(p-tolyl)-3,4-dihydroquinazoline-1(2H)-carboxylate (3ha)**

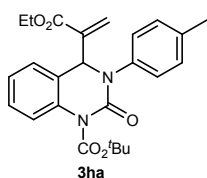

The reaction was conducted on a 0.1 mmol scale according to the GP2 and afforded dihydroquinazolinone **3ha** as white solid (40.1 mg, 92% yield, mp: 73-75 °C). R<sub>f</sub> = 0.5 (petroleum ether/ethyl acetate = 3:1). <sup>1</sup>H NMR (400 MHz, Chloroform-*d*) δ 7.45 (d, *J* = 7.5 Hz, 1H), 7.37 – 7.30 (m, 1H), 7.16 (d, *J* = 8.1 Hz, 5H), 6.42 (s, 1H), 6.12 (s, 1H), 5.67 (s, 1H), 4.27 – 4.10 (m, 2H), 2.33 (s, 3H), 1.55 (s, 9H), 1.28 (t, *J* = 7.1 Hz, 3H). <sup>13</sup>C NMR (101 MHz,

CDCl<sub>3</sub>) δ 165.3, 152.3, 151.1, 138.9, 138.4, 136.7, 135.4, 129.7, 128.3, 127.6, 126.8, 125.0, 124.9, 124.1, 122.3, 83.6, 62.5, 61.3, 28.0, 21.0, 14.1. HRMS(ESI) m/z: [M + H]<sup>+</sup> calcd for C<sub>25</sub>H<sub>29</sub>N<sub>2</sub>O<sub>5</sub><sup>+</sup> 437.2071; Found: 437.2071.

**allyl 4-(3-ethoxy-3-oxoprop-1-en-2-yl)-2-oxo-3-(p-tolyl)-3,4-dihydroquinazoline-1(2H)-carboxylate (3ia)**

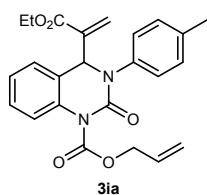

The reaction was conducted on a 0.1 mmol scale according to the GP2 and afforded dihydroquinazolinone **3ia** as colorless viscous oil (37.8 mg, 90% yield). R<sub>f</sub> = 0.5 (petroleum ether/ethyl acetate = 3:1). <sup>1</sup>H NMR (400 MHz, Chloroform-*d*) δ 7.81 (d, *J* = 8.2 Hz, 1H), 7.51 (d, *J* = 7.5 Hz, 1H), 7.38 (t, *J* = 7.7 Hz, 1H), 7.26 – 7.11 (m, 5H), 6.42 (s, 1H), 6.11 (s, 1H), 6.00 (ddt, *J* = 16.3, 10.7, 5.5 Hz, 1H), 5.71 (s, 1H), 5.45 (d, *J* = 17.1 Hz, 1H), 5.29 (d, *J* = 10.5

Hz, 1H), 4.83 (d, *J* = 5.0 Hz, 2H), 4.32 – 4.08 (m, 2H), 2.36 (s, 3H), 1.28 (t, *J* = 7.1 Hz, 3H). <sup>13</sup>C NMR (101 MHz, CDCl<sub>3</sub>) δ 165.2, 152.3, 151.8, 138.8, 138.2, 137.0, 135.3, 131.5, 129.7, 128.4, 128.2, 126.8, 125.5, 125.1, 124.1, 123.0, 118.9, 67.7, 62.8, 61.3, 21.0, 14.0. HRMS(ESI) m/z: [M + H]<sup>+</sup> calcd for C<sub>24</sub>H<sub>25</sub>N<sub>2</sub>O<sub>5</sub><sup>+</sup> 421.1758; Found:

**(1R,2S,5R)-2-isopropyl-5-methylcyclohexyl 4-(3-ethoxy-3-oxoprop-1-en-2-yl)-2-oxo-3-(p-tolyl)-3,4-dihydroquinazoline-1(2H)-carboxylate (3ja)**

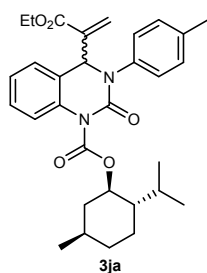

The reaction was conducted on a 0.1 mmol scale according to the GP2 and afforded dihydroquinazolinone **3ja** as colorless viscous oil (44.1 mg, 85% yield, d.r. = 1:1).  $R_f = 0.5$  (petroleum ether/ethyl acetate = 10:1).  $^1\text{H NMR}$  (400 MHz, Chloroform-*d*)  $\delta$  7.78 (dd,  $J = 54.2, 8.2$  Hz, 1H), 7.46 (d,  $J = 7.5$  Hz, 1H), 7.35 (q,  $J = 7.4$  Hz, 1H), 7.18 (d,  $J = 7.4$  Hz, 5H), 6.36 (d,  $J = 10.3$  Hz, 1H), 6.09 (d,  $J = 12.2$  Hz, 1H), 5.66 (d,  $J = 10.1$  Hz, 1H), 4.80 (td,  $J = 10.9, 4.3$  Hz, 1H), 4.28 – 4.09 (m, 2H), 2.33 (s, 3H), 2.25 – 1.87 (m, 2H), 1.69 (d,  $J = 10.7$  Hz, 2H), 1.56 – 1.43 (m, 2H), 1.27 (t,  $J = 7.1$  Hz, 4H), 1.06 (q,  $J = 11.8$  Hz, 2H), 0.92 (d,  $J = 6.3$  Hz, 4H), 0.84 (d,  $J = 7.0$  Hz, 2H), 0.78 (d,  $J = 6.9$  Hz, 3H).  $^{13}\text{C NMR}$  (101 MHz,  $\text{CDCl}_3$ )  $\delta$  165.2, 152.4, 152.1, 152.0, 151.8, 139.0, 138.4, 138.3, 136.9, 136.8, 135.4, 129.8, 129.7, 128.5, 128.4, 128.2, 127.8, 126.8, 126.7, 125.3, 125.2, 125.0, 124.8, 123.9, 123.5, 122.5, 78.1, 77.9, 77.3, 62.9, 62.6, 61.3, 61.3, 47.0, 46.7, 40.8, 40.1, 34.2, 34.1, 31.5, 31.5, 26.1, 25.7, 23.1, 23.1, 22.1, 22.0, 21.0, 20.9, 20.9, 16.1, 16.0, 14.1. **HRMS(ESI)**  $m/z$ :  $[\text{M} + \text{H}]^+$  calcd for  $\text{C}_{31}\text{H}_{39}\text{N}_2\text{O}_5^+$  519.2854; Found: 519.2850.

**methyl 4-(3-ethoxy-3-oxoprop-1-en-2-yl)-8-methyl-2-oxo-3-(p-tolyl)-3,4-dihydroquinazoline-1(2H)-carboxylate (3ka)**

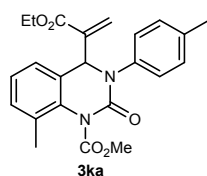

The reaction was conducted on a 0.1 mmol scale according to the GP2 and afforded dihydroquinazolinone **3ka** as colorless viscous oil (40.4 mg, 99% yield).  $R_f = 0.5$  (petroleum ether/ethyl acetate = 3:1).  $^1\text{H NMR}$  (400 MHz, Chloroform-*d*)  $\delta$  7.39 (d,  $J = 7.2$  Hz, 1H), 7.28 (d,  $J = 9.3$  Hz, 1H), 7.22 (d,  $J = 6.0$  Hz, 5H), 6.40 (s, 1H), 6.01 (s, 1H), 5.68 (s, 1H), 4.24 (dq,  $J = 10.9, 7.1$  Hz, 1H), 4.18 – 4.08 (m, 1H), 3.88 (s, 3H), 2.42 – 2.33 (m, 6H), 1.27 (t,  $J = 7.1$  Hz, 3H).  $^{13}\text{C NMR}$  (101 MHz,  $\text{CDCl}_3$ )  $\delta$  165.2, 152.2, 151.8, 138.7, 138.4, 137.1, 134.5, 134.4, 131.5, 131.1, 129.7, 126.8, 125.0, 124.8, 123.6, 63.7, 61.4, 53.9, 21.1, 18.3, 14.0. **HRMS(ESI)**  $m/z$ :  $[\text{M} + \text{H}]^+$  calcd for  $\text{C}_{23}\text{H}_{25}\text{N}_2\text{O}_5^+$  409.1758; Found: 409.1764.

**methyl 4-(3-ethoxy-3-oxoprop-1-en-2-yl)-7-methyl-2-oxo-3-(p-tolyl)-3,4-dihydroquinazoline-1(2H)-carboxylate (3la)**

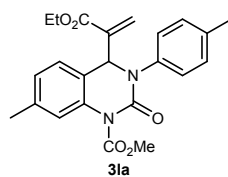

The reaction was conducted on a 0.1 mmol scale according to the GP2 and afforded dihydroquinazolinone **3la** as white solid (40.4 mg, 99% yield, mp: 105-107 °C).  $R_f = 0.5$  (petroleum ether/ethyl acetate = 3:1).  $^1\text{H NMR}$  (400 MHz, Chloroform-*d*)  $\delta$  7.59 (s, 1H), 7.35 (d,  $J = 7.9$  Hz, 1H), 7.17 (s, 4H), 7.01 (d,  $J = 7.9$  Hz, 1H), 6.37 (s, 1H), 6.04 (s, 1H), 5.64 (s, 1H), 4.25 – 4.07 (m, 2H), 3.91 (s, 3H), 2.39 (s, 3H), 2.33 (s, 3H), 1.25 (t,  $J = 7.1$  Hz, 3H).  $^{13}\text{C NMR}$  (101 MHz,  $\text{CDCl}_3$ )  $\delta$  165.2, 153.2, 152.0, 138.8, 138.6, 138.2, 137.0, 135.2, 129.7, 126.6, 126.3, 125.4, 125.2, 123.9, 123.4, 62.6, 61.3, 54.1, 21.5, 21.0, 14.1. **HRMS(ESI)**  $m/z$ :  $[\text{M} + \text{H}]^+$  calcd for  $\text{C}_{23}\text{H}_{25}\text{N}_2\text{O}_5^+$  409.1758; Found: 409.1762.

**methyl 7-chloro-4-(3-ethoxy-3-oxoprop-1-en-2-yl)-2-oxo-3-(p-tolyl)-3,4-dihydroquinazoline-1(2H)-carboxylate (3ma)**

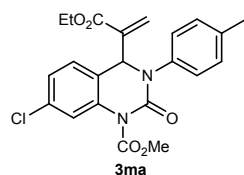

The reaction was conducted on a 0.1 mmol scale according to the GP2 and afforded dihydroquinazolinone **3ma** as white solid (36 mg, 84% yield, mp: 137-139 °C).  $R_f = 0.5$  (petroleum ether/ethyl acetate = 3:1).  $^1\text{H NMR}$  (400 MHz, Chloroform-*d*)  $\delta$  7.84 (d,  $J = 2.1$

Hz, 1H), 7.43 (d,  $J = 8.2$  Hz, 1H), 7.17 (d,  $J = 4.9$  Hz, 5H), 6.42 (s, 1H), 6.08 (s, 1H), 5.65 (s, 1H), 4.26 – 4.09 (m, 2H), 3.93 (s, 3H), 2.34 (s, 3H), 1.27 (t,  $J = 7.2$  Hz, 3H).  $^{13}\text{C}$  NMR (101 MHz,  $\text{CDCl}_3$ )  $\delta$  165.0, 152.9, 151.4, 138.5, 137.6, 137.3, 136.2, 134.3, 129.8, 127.9, 126.4, 125.7, 125.2, 124.4, 123.0, 62.3, 61.5, 54.4, 21.1, 14.1. HRMS(ESI)  $m/z$ :  $[\text{M} + \text{H}]^+$  calcd for  $\text{C}_{22}\text{H}_{22}\text{ClN}_2\text{O}_5^+$  429.1212; Found: 429.1216.

**methyl 7-bromo-4-(3-ethoxy-3-oxoprop-1-en-2-yl)-2-oxo-3-(p-tolyl)-3,4-dihydroquinazoline-1(2H)-carboxylate (3na)**

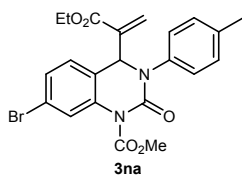

The reaction was conducted on a 0.1 mmol scale according to the GP2 and afforded dihydroquinazolinone **3na** as white solid (34.9 mg, 74% yield, mp: 111-113 °C).  $R_f = 0.5$  (petroleum ether/ethyl acetate = 3:1).  $^1\text{H}$  NMR (400 MHz, Chloroform- $d$ )  $\delta$  8.02 (d,  $J = 2.0$  Hz, 1H), 7.42 – 7.32 (m, 2H), 7.19 (s, 4H), 6.44 (d,  $J = 0.9$  Hz, 1H), 6.11 (d,  $J = 1.7$  Hz, 1H), 5.65 (s, 1H), 4.29 – 4.09 (m, 2H), 3.95 (s, 3H), 2.36 (s, 3H), 1.29 (t,  $J = 7.2$  Hz, 3H).

$^{13}\text{C}$  NMR (101 MHz,  $\text{CDCl}_3$ )  $\delta$  165.0, 152.9, 151.4, 138.5, 137.5, 137.3, 136.3, 129.8, 128.6, 128.2, 126.9, 125.8, 125.1, 124.4, 122.1, 62.4, 61.5, 54.4, 21.1, 14.1. HRMS(ESI)  $m/z$ :  $[\text{M} + \text{H}]^+$  calcd for  $\text{C}_{22}\text{H}_{22}\text{BrN}_2\text{O}_5^+$  473.0707; Found: 473.0704.

**methyl 4-(3-ethoxy-3-oxoprop-1-en-2-yl)-6-methoxy-2-oxo-3-(p-tolyl)-3,4-dihydroquinazoline-1(2H)-carboxylate (3oa)**

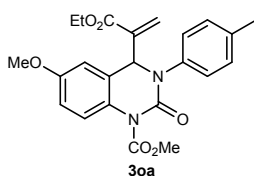

The reaction was conducted on a 0.1 mmol scale according to the GP2 and afforded dihydroquinazolinone **3oa** as colorless viscous oil (39.4 mg, 93% yield).  $R_f = 0.5$  (petroleum ether/ethyl acetate = 3:1).  $^1\text{H}$  NMR (400 MHz, Chloroform- $d$ )  $\delta$  7.69 (d,  $J = 8.9$  Hz, 1H), 7.20 (s, 4H), 7.05 (d,  $J = 2.9$  Hz, 1H), 6.93 (dd,  $J = 9.0, 2.9$  Hz, 1H), 6.42 (s, 1H), 6.08 (s, 1H), 5.65 (s, 1H), 4.26 – 4.12 (m, 2H), 3.92 (s, 3H), 3.83 (s, 3H), 2.36 (s, 3H), 1.29 (t,  $J = 7.2$  Hz, 3H).

$^{13}\text{C}$  NMR (101 MHz,  $\text{CDCl}_3$ )  $\delta$  165.2, 157.2, 153.1, 152.1, 138.8, 137.9, 137.1, 129.8, 129.3, 128.4, 125.3, 124.5, 124.1, 113.9, 111.8, 62.9, 61.4, 55.6, 54.0, 21.0, 14.1. HRMS(ESI)  $m/z$ :  $[\text{M} + \text{H}]^+$  calcd for  $\text{C}_{23}\text{H}_{25}\text{N}_2\text{O}_6^+$  425.1707; Found: 425.1708.

**methyl 4-(3-ethoxy-3-oxoprop-1-en-2-yl)-6-methyl-2-oxo-3-(p-tolyl)-3,4-dihydroquinazoline-1(2H)-carboxylate (3pa)**

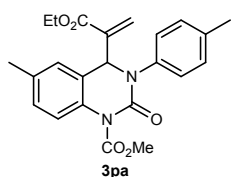

The reaction was conducted on a 0.1 mmol scale according to the GP2 and afforded dihydroquinazolinone **3pa** as white solid (36.7 mg, 90% yield, mp: 40-42 °C).  $R_f = 0.5$  (petroleum ether/ethyl acetate = 3:1).  $^1\text{H}$  NMR (400 MHz, Chloroform- $d$ )  $\delta$  7.63 (d,  $J = 8.3$  Hz, 1H), 7.28 (s, 1H), 7.17 (d,  $J = 6.3$  Hz, 5H), 6.41 – 6.36 (m, 1H), 6.04 (d,  $J = 1.3$  Hz, 1H), 5.63 (s, 1H), 4.27 – 4.08 (m, 2H), 3.90 (s, 3H), 2.34 (d,  $J = 4.4$  Hz, 6H), 1.26 (t,  $J = 7.1$  Hz, 3H).

$^{13}\text{C}$  NMR (101 MHz,  $\text{CDCl}_3$ )  $\delta$  165.2, 153.1, 152.0, 138.8, 138.1, 137.1, 135.4, 132.9, 129.7, 129.0, 128.3, 127.2, 125.3, 124.1, 123.0, 62.8, 61.3, 54.1, 21.1, 21.0, 14.1. HRMS(ESI)  $m/z$ :  $[\text{M} + \text{H}]^+$  calcd for  $\text{C}_{23}\text{H}_{25}\text{N}_2\text{O}_5^+$  409.1758; Found: 409.1759.

**methyl 4-(3-ethoxy-3-oxoprop-1-en-2-yl)-6-fluoro-2-oxo-3-(p-tolyl)-3,4-dihydroquinazoline-1(2H)-carboxylate (3qa)**

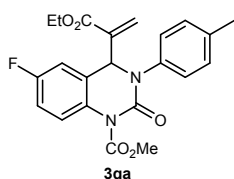

The reaction was conducted on a 0.1 mmol scale according to the GP2 and afforded dihydroquinazolinone **3qa** as white solid (35.9 mg, 87% yield, mp: 44-46 °C).  $R_f = 0.5$  (petroleum ether/ethyl acetate = 3:1).  $^1\text{H}$  NMR (400 MHz, Chloroform- $d$ )  $\delta$  7.75 (dd,  $J = 9.0, 4.8$  Hz, 1H), 7.23 (dd,  $J = 8.2, 2.8$  Hz, 1H), 7.18 (s, 4H), 7.07 (td,  $J = 8.8, 2.9$  Hz, 1H),

6.43 (s, 1H), 6.13 – 6.06 (m, 1H), 5.62 (s, 1H), 4.19 (dddd,  $J = 18.0, 10.8, 7.2, 3.7$  Hz, 2H), 3.91 (s, 3H), 2.34 (s, 3H), 1.28 (t,  $J = 7.1$  Hz, 3H).  $^{13}\text{C NMR}$  (101 MHz,  $\text{CDCl}_3$ )  $\delta$  165.0, 159.9 (d,  $J = 246.3$  Hz), 153.0, 151.7, 138.5, 137.4, 137.3, 131.4, 130.2 (d,  $J = 8.1$  Hz), 129.8, 125.2, 124.9 (d,  $J = 8.4$  Hz), 124.5, 115.3 (d,  $J = 22.8$  Hz), 113.8 (d,  $J = 24.2$  Hz), 62.5, 61.5, 54.2, 21.1, 14.0.  $^{19}\text{F NMR}$  (377 MHz, Chloroform- $d$ )  $\delta$  -116.04 (td,  $J = 8.1, 5.0$  Hz). **HRMS(ESI)**  $m/z$ :  $[\text{M} + \text{H}]^+$  calcd for  $\text{C}_{22}\text{H}_{22}\text{FN}_2\text{O}_5^+$  413.1507; Found: 413.1510.

**methyl 6-chloro-4-(3-ethoxy-3-oxoprop-1-en-2-yl)-2-oxo-3-(p-tolyl)-3,4-dihydroquinazoline-1(2H)-carboxylate (3ra)**

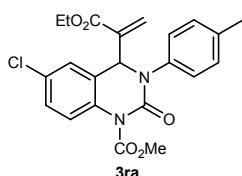

The reaction was conducted on a 0.1 mmol scale according to the GP2 and afforded dihydroquinazolinone **3ra** as white solid (42.4 mg, 99% yield, mp: 43-45 °C).  $R_f = 0.5$  (petroleum ether/ethyl acetate = 3:1).  $^1\text{H NMR}$  (400 MHz, Chloroform- $d$ )  $\delta$  7.73 (d,  $J = 8.7$  Hz, 1H), 7.50 (s, 1H), 7.37 – 7.30 (m, 1H), 7.17 (s, 4H), 6.44 (s, 1H), 6.08 (s, 1H), 5.62 (s, 1H), 4.32 – 4.09 (m, 2H), 3.91 (s, 3H), 2.34 (s, 3H), 1.29 (t,  $J = 7.1$  Hz, 3H).  $^{13}\text{C NMR}$  (101 MHz,  $\text{CDCl}_3$ )  $\delta$  164.9, 152.9, 151.5, 138.4, 137.4, 133.9, 131.0, 129.9, 129.7, 128.5, 126.9, 125.3, 124.7, 124.4, 62.4, 61.6, 54.3, 21.1, 14.1. **HRMS(ESI)**  $m/z$ :  $[\text{M} + \text{H}]^+$  calcd for  $\text{C}_{22}\text{H}_{22}\text{ClN}_2\text{O}_5^+$  429.1212; Found: 429.1211.

**methyl 6-bromo-4-(3-ethoxy-3-oxoprop-1-en-2-yl)-2-oxo-3-(p-tolyl)-3,4-dihydroquinazoline-1(2H)-carboxylate (3sa)**

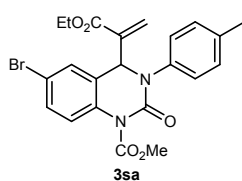

The reaction was conducted on a 0.1 mmol scale according to the GP2 and afforded dihydroquinazolinone **3sa** as white solid (34.5 mg, 73% yield, mp: 108-110 °C).  $R_f = 0.5$  (petroleum ether/ethyl acetate = 3:1).  $^1\text{H NMR}$  (400 MHz, Chloroform- $d$ )  $\delta$  7.70 – 7.63 (m, 2H), 7.48 (dd,  $J = 8.7, 2.2$  Hz, 1H), 7.17 (s, 4H), 6.44 (s, 1H), 6.12 – 6.04 (m, 1H), 5.61 (s, 1H), 4.20 (dddd,  $J = 34.8, 14.3, 10.8, 7.1$  Hz, 2H), 3.91 (s, 3H), 2.34 (s, 3H), 1.29 (t,  $J = 7.1$  Hz, 3H).  $^{13}\text{C NMR}$  (101 MHz,  $\text{CDCl}_3$ )  $\delta$  164.9, 152.8, 151.4, 138.4, 137.4, 137.4, 134.4, 131.4, 130.0, 129.9, 129.8, 125.3, 124.8, 124.6, 118.7, 62.3, 61.6, 54.3, 21.1, 14.1. **HRMS(ESI)**  $m/z$ :  $[\text{M} + \text{H}]^+$  calcd for  $\text{C}_{22}\text{H}_{22}\text{BrN}_2\text{O}_5^+$  473.0707; Found: 473.0707.

**methyl 4-(3-ethoxy-3-oxoprop-1-en-2-yl)-5-methyl-2-oxo-3-(p-tolyl)-3,4-dihydroquinazoline-1(2H)-carboxylate (3ta)**

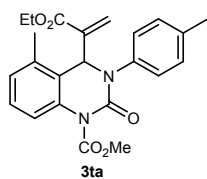

The reaction was conducted on a 0.1 mmol scale according to the GP2 and afforded dihydroquinazolinone **3ta** as white solid (39.6 mg, 97% yield, mp: 92-94 °C).  $R_f = 0.5$  (petroleum ether/ethyl acetate = 3:1).  $^1\text{H NMR}$  (400 MHz, Chloroform- $d$ )  $\delta$  7.61 (d,  $J = 8.0$  Hz, 1H), 7.34 (t,  $J = 7.8$  Hz, 1H), 7.17 (dq,  $J = 16.9, 7.7$  Hz, 5H), 6.28 (s, 1H), 5.87 (s, 1H), 5.50 (s, 1H), 4.15 (dt,  $J = 14.4, 7.2$  Hz, 1H), 4.00 (dq,  $J = 13.1, 6.4, 5.8$  Hz, 1H), 3.93 (s, 3H), 2.37 (d,  $J = 6.3$  Hz, 6H), 1.13 (t,  $J = 7.0$  Hz, 3H).  $^{13}\text{C NMR}$  (101 MHz,  $\text{CDCl}_3$ )  $\delta$  165.7, 153.3, 151.3, 139.2, 137.9, 137.1, 136.4, 133.8, 129.7, 128.3, 127.8, 127.6, 126.5, 126.2, 121.5, 61.3, 59.6, 54.1, 21.1, 18.6, 13.8. **HRMS(ESI)**  $m/z$ :  $[\text{M} + \text{H}]^+$  calcd for  $\text{C}_{23}\text{H}_{25}\text{N}_2\text{O}_5^+$  409.1758; Found: 409.1766.

**methyl 4-(3-ethoxy-3-oxoprop-1-en-2-yl)-7,8-dimethyl-2-oxo-3-(p-tolyl)-3,4-dihydroquinazoline-1(2H)-carboxylate (3ua)**

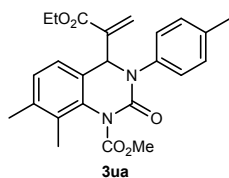

The reaction was conducted on a 0.1 mmol scale according to the GP2 and afforded dihydroquinazolinone **3ua** as colorless viscous oil (41.8 mg, 99% yield).  $R_f = 0.5$  (petroleum ether/ethyl acetate = 3:1).  $^1\text{H NMR}$  (400 MHz, Chloroform- $d$ )  $\delta$  7.29 (d,  $J = 4.9$  Hz, 1H),

7.20 (s, 4H), 7.12 (d,  $J = 7.6$  Hz, 1H), 6.37 (s, 1H), 6.00 (s, 1H), 5.65 (s, 1H), 4.23 (dq,  $J = 14.2, 7.1$  Hz, 1H), 4.17 – 4.06 (m, 1H), 3.87 (s, 3H), 2.35 (d,  $J = 5.2$  Hz, 6H), 2.22 (s, 3H), 1.27 (t,  $J = 7.1$  Hz, 3H).  $^{13}\text{C}$  NMR (101 MHz,  $\text{CDCl}_3$ )  $\delta$  165.3, 152.4, 152.0, 138.7, 138.5, 138.3, 136.9, 134.3, 133.1, 129.7, 129.2, 128.2, 124.9, 124.1, 123.4, 63.6, 61.3, 53.9, 21.1, 20.3, 15.3, 14.0. HRMS(ESI)  $m/z$ :  $[\text{M} + \text{H}]^+$  calcd for  $\text{C}_{24}\text{H}_{27}\text{N}_2\text{O}_5^+$  423.1915; Found: 423.1920.

## 6.2. Products of derivatization

### ethyl 2-(2-oxo-3-(*p*-tolyl)-1,2,3,4-tetrahydroquinazolin-4-yl)acrylate (**4a**)

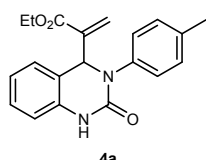

The reaction was conducted on a 0.1 mmol scale according to the corresponding procedure in section 5.2 and afforded **4a** as colorless viscous oil (24.9 mg, 74% yield).  $R_f = 0.4$  (petroleum ether/ethyl acetate = 3:1).  $^1\text{H}$  NMR (400 MHz, Chloroform-*d*)  $\delta$  7.99 (s, 1H), 7.25 – 7.13 (m, 6H), 6.94 (t,  $J = 7.5$  Hz, 1H), 6.76 (d,  $J = 7.9$  Hz, 1H), 6.27 (s, 1H), 5.86 (s, 1H), 5.82 (s, 1H), 4.23 – 4.09 (m, 2H), 2.34 (s, 3H), 1.23 (t,  $J = 7.2$  Hz, 3H).  $^{13}\text{C}$  NMR (101 MHz,  $\text{CDCl}_3$ )  $\delta$  165.4, 153.8, 140.0, 138.6, 136.4, 136.1, 129.6, 128.6, 126.4, 126.3, 125.6, 122.2, 120.0, 114.2, 62.8, 61.1, 21.0, 14.0. HRMS(ESI)  $m/z$ :  $[\text{M} + \text{H}]^+$  calcd for  $\text{C}_{20}\text{H}_{21}\text{N}_2\text{O}_3^+$  337.1547; Found: 337.1544.

### 6-bromo-4-(prop-1-en-2-yl)-3-(*p*-tolyl)-3,4-dihydroquinazolin-2(1H)-one (**4b**)

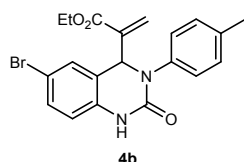

The reaction was conducted on a 0.1 mmol scale according to the corresponding procedure in section 5.2 and afforded **4b** as white solid (36 mg, 87% yield, mp: 210-212 °C).  $R_f = 0.4$  (petroleum ether/ethyl acetate = 3:1).  $^1\text{H}$  NMR (400 MHz, Chloroform-*d*)  $\delta$  9.16 (s, 1H), 7.35 (s, 1H), 7.23 (d,  $J = 8.5$  Hz, 1H), 7.18 (s, 4H), 6.64 (d,  $J = 8.4$  Hz, 1H), 6.31 (s, 1H), 5.86 (s, 1H), 5.75 (s, 1H), 4.18 (tdt,  $J = 14.4, 11.0, 5.4$  Hz, 2H), 2.35 (s, 3H), 1.26 (t,  $J = 7.1$  Hz, 3H).  $^{13}\text{C}$  NMR (101 MHz,  $\text{CDCl}_3$ )  $\delta$  165.1, 154.0, 139.4, 138.3, 136.7, 135.4, 131.5, 129.8, 129.1, 126.4, 121.7, 116.2, 114.1, 62.4, 61.3, 21.1, 14.0. HRMS(ESI)  $m/z$ :  $[\text{M} + \text{H}]^+$  calcd for  $\text{C}_{20}\text{H}_{20}\text{BrN}_2\text{O}_3^+$  415.0652; Found: 415.0646.

### ethyl (R)-5-((R)-1-(tert-butoxycarbonyl)-2-oxo-3-(*p*-tolyl)-1,2,3,4-tetrahydroquinazolin-4-yl)-3-methyl-4,5-dihydroisoxazole-5-carboxylate (**4c-major**)

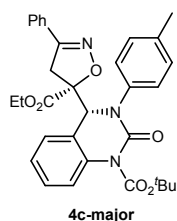

The reaction was conducted on a 0.2 mmol scale according to the corresponding procedure in section 5.2 and afforded **4c-major** as pale-yellow solid (70.0 mg, 63% yield, mp: 112-114 °C).  $R_f = 0.5$  (petroleum ether/ethyl acetate = 4:1).  $^1\text{H}$  NMR (400 MHz, Chloroform-*d*)  $\delta$  7.61 (d,  $J = 8.2$  Hz, 1H), 7.48 (d,  $J = 6.9$  Hz, 2H), 7.36 (dq,  $J = 19.8, 7.0$  Hz, 5H), 7.17 (d,  $J = 6.7$  Hz, 5H), 5.52 (s, 1H), 4.01 – 3.87 (m, 2H), 3.65 (dq,  $J = 10.6, 7.1$  Hz, 1H), 3.49 (d,  $J = 17.4$  Hz, 1H), 2.33 (s, 3H), 1.62 (s, 9H), 0.97 (t,  $J = 7.1$  Hz, 3H).  $^{13}\text{C}$  NMR (101 MHz,  $\text{CDCl}_3$ )  $\delta$  169.7, 156.8, 151.1, 139.2, 137.2, 136.6, 130.5, 129.6, 129.2, 128.7, 128.4, 128.0, 127.0, 126.7, 124.8, 122.8, 120.9, 91.1, 84.0, 65.0, 62.5, 38.7, 28.0, 21.0, 13.5. HRMS(ESI)  $m/z$ :  $[\text{M} + \text{Na}]^+$  calcd for  $\text{C}_{32}\text{H}_{33}\text{N}_3\text{NaO}_3^+$  578.2261; Found: 578.2257.

### ethyl (S)-5-((R)-1-(tert-butoxycarbonyl)-2-oxo-3-(*p*-tolyl)-1,2,3,4-tetrahydroquinazolin-4-yl)-3-phenyl-4,5-dihydroisoxazole-5-carboxylate (**4c-minor**)

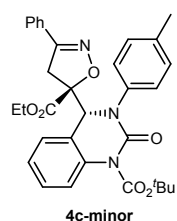

The reaction was conducted on a 0.2 mmol scale according to the corresponding procedure in section 5.2 and afforded **4c-minor** as pale yellow solid (17.8 mg, 16% yield, mp: 167-169 °C).  $R_f = 0.4$  (petroleum ether/ethyl acetate = 4:1).  $^1\text{H}$  NMR (400 MHz, Chloroform-*d*)  $\delta$  7.83 (d,  $J = 8.2$  Hz, 1H), 7.61 (d,  $J = 6.6$  Hz, 2H), 7.48 – 7.36 (m, 4H), 7.30 – 7.16 (m, 6H), 5.46 (s, 1H), 4.20 – 4.00 (m, 2H), 3.83 (d,  $J = 17.4$  Hz, 1H), 3.71 (d,  $J = 17.4$  Hz, 1H), 2.37 (s, 3H), 1.58 (s, 9H), 1.21



(t,  $J = 7.1$  Hz, 3H).  **$^{13}\text{C}$  NMR** (101 MHz,  $\text{CDCl}_3$ )  $\delta$  169.6, 157.0, 151.8, 151.1, 139.7, 137.4, 136.7, 130.6, 129.8, 129.3, 128.7, 128.5, 127.3, 126.8, 126.8, 124.6, 122.8, 121.4, 91.9, 84.0, 65.8, 62.6, 39.5, 27.9, 21.1, 13.8. **HRMS(ESI)**  $m/z$ :  $[\text{M} + \text{Na}]^+$  calcd for  $\text{C}_{32}\text{H}_{33}\text{N}_3\text{NaO}_3^+$  578.2261; Found: 578.2257.

## 7. X-ray Crystallographic Analysis

### DABCO catalyzed [4+2] cycloadduct - **3ha**

Crystallographic data for **3ha** has been deposited with the Cambridge Crystallographic Data Centre as deposition number CCDC 2034954 (Experimental Crystal Structure Determination, 2020, DOI: 10.5517/ccdc.csd.cc25y2v2). These data can be obtained free of charge via [www.ccdc.cam.ac.uk/data\\_request/cif](http://www.ccdc.cam.ac.uk/data_request/cif), or by emailing [data\\_request@ccdc.cam.ac.uk](mailto:data_request@ccdc.cam.ac.uk), or by contacting The Cambridge Crystallographic Data Centre, 12, Union Road, Cambridge CB2 1EZ, UK; fax: +44 1223 336033.

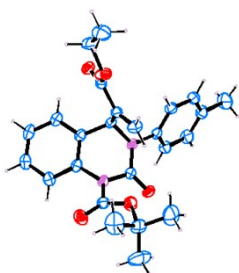

ORTEP diagram of **3ha**. Thermal ellipsoids are shown at the 50% probability level. A colorless stick-shaped crystal of **3ha** for X-ray diffraction was obtained by slowly volatilizing a saturated solution of 3fa in hexane/chloroform (5:1). The X-ray intensity data was measured on a Rigaku 007 Saturn 70 single crystal diffractometer.

---

|                                             |                                                               |
|---------------------------------------------|---------------------------------------------------------------|
| CCDC number                                 | 2023954                                                       |
| Identification code                         | <b>3ha</b>                                                    |
| Empirical formula                           | C <sub>25</sub> H <sub>28</sub> N <sub>2</sub> O <sub>5</sub> |
| Formula weight                              | 436.49                                                        |
| Temperature/K                               | 113(2)                                                        |
| Crystal system                              | monoclinic                                                    |
| Space group                                 | P2 <sub>1</sub> /n                                            |
| a/Å                                         | 8.2030(16)                                                    |
| b/Å                                         | 35.274(7)                                                     |
| c/Å                                         | 8.3403(17)                                                    |
| α/°                                         | 90                                                            |
| β/°                                         | 102.52(3)                                                     |
| γ/°                                         | 90                                                            |
| Volume/Å <sup>3</sup>                       | 2355.9(9)                                                     |
| Z                                           | 4                                                             |
| ρ <sub>calc</sub> /cm <sup>3</sup>          | 1.231                                                         |
| μ/mm <sup>-1</sup>                          | 0.086                                                         |
| F(000)                                      | 928.0                                                         |
| Crystal size/mm <sup>3</sup>                | 0.200 × 0.180 × 0.120                                         |
| Radiation                                   | MoKα (λ = 0.71073)                                            |
| 2θ range for data collection/°              | 5.134 to 55.808                                               |
| Index ranges                                | -10 ≤ h ≤ 10, -46 ≤ k ≤ 46, -10 ≤ l ≤ 10                      |
| Reflections collected                       | 26220                                                         |
| Independent reflections                     | 5622 [R <sub>int</sub> = 0.0594, R <sub>sigma</sub> = 0.0528] |
| Data/restraints/parameters                  | 5622/0/295                                                    |
| Goodness-of-fit on F <sup>2</sup>           | 1.024                                                         |
| Final R indexes [I ≥ 2σ (I)]                | R <sub>1</sub> = 0.0551, wR <sub>2</sub> = 0.1329             |
| Final R indexes [all data]                  | R <sub>1</sub> = 0.0812, wR <sub>2</sub> = 0.1476             |
| Largest diff. peak/hole / e Å <sup>-3</sup> | 0.22/-0.21                                                    |

---

## 8. NMR Spectra

### *o*-Amino-acylation aryl MBH carbonates

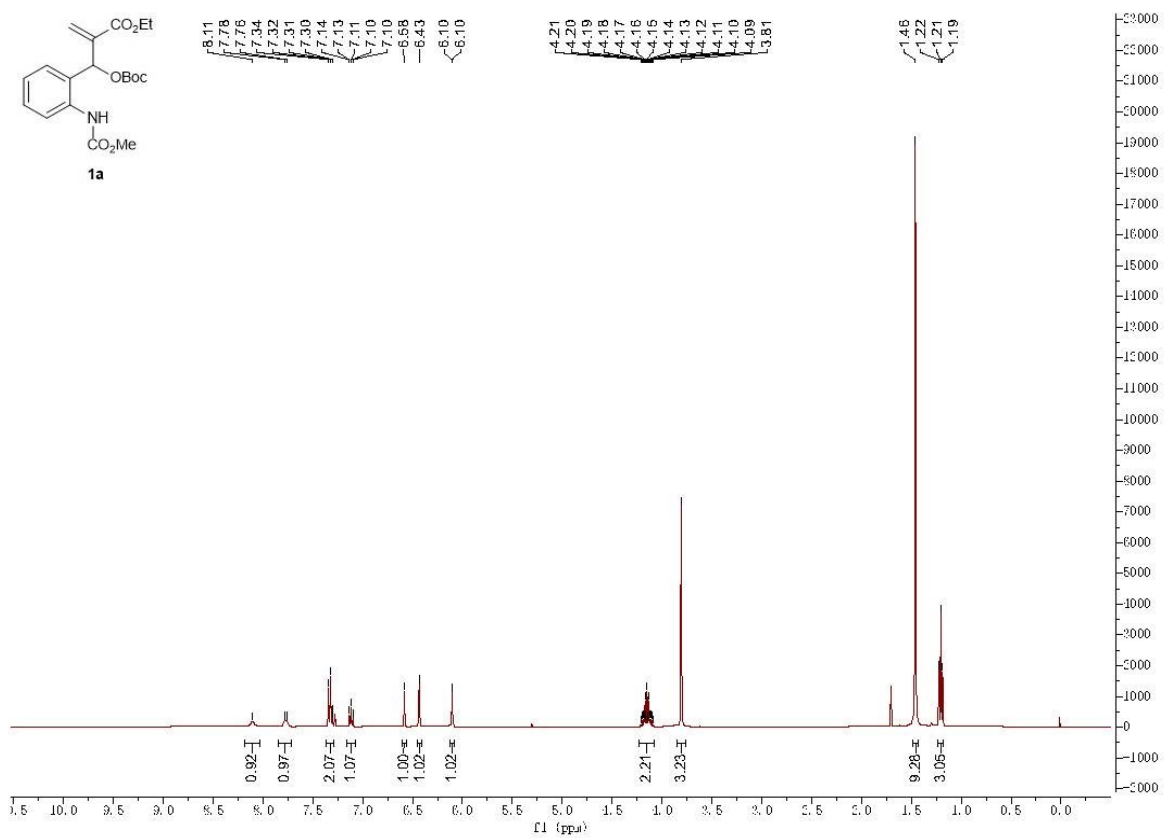

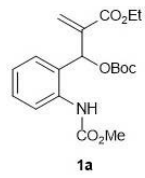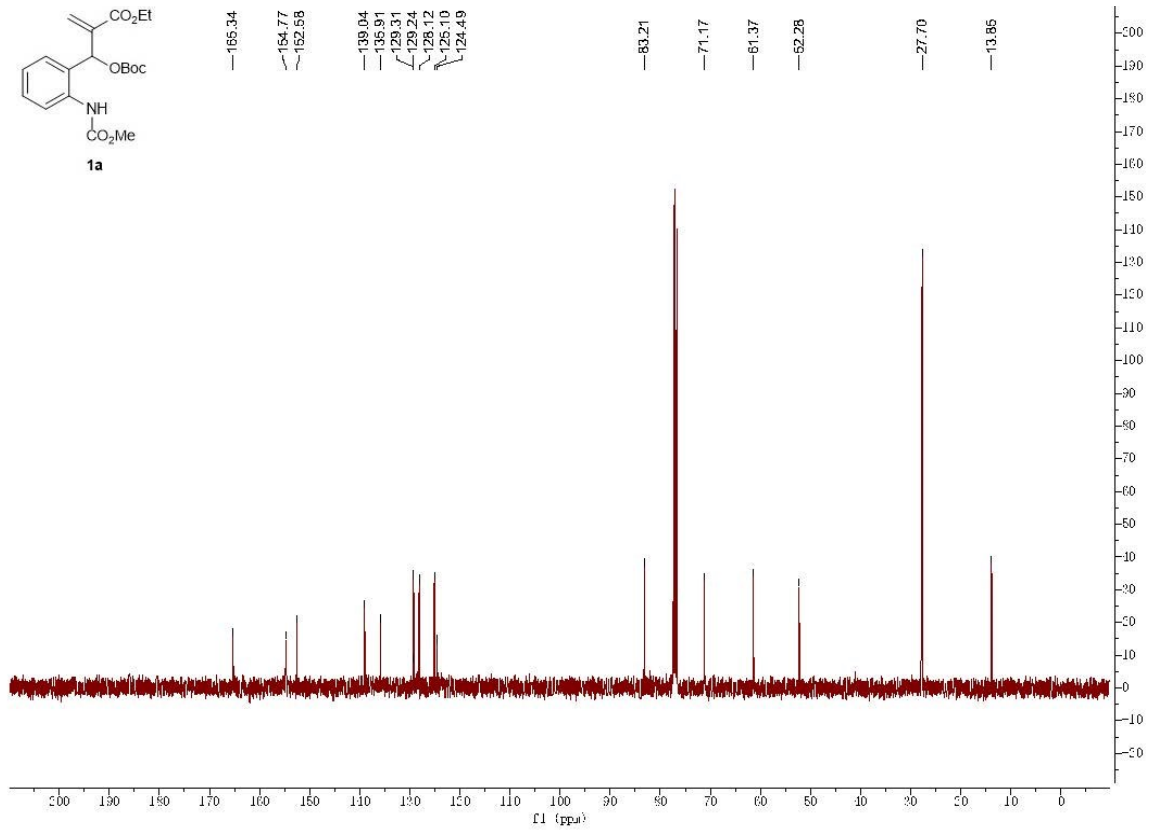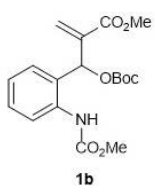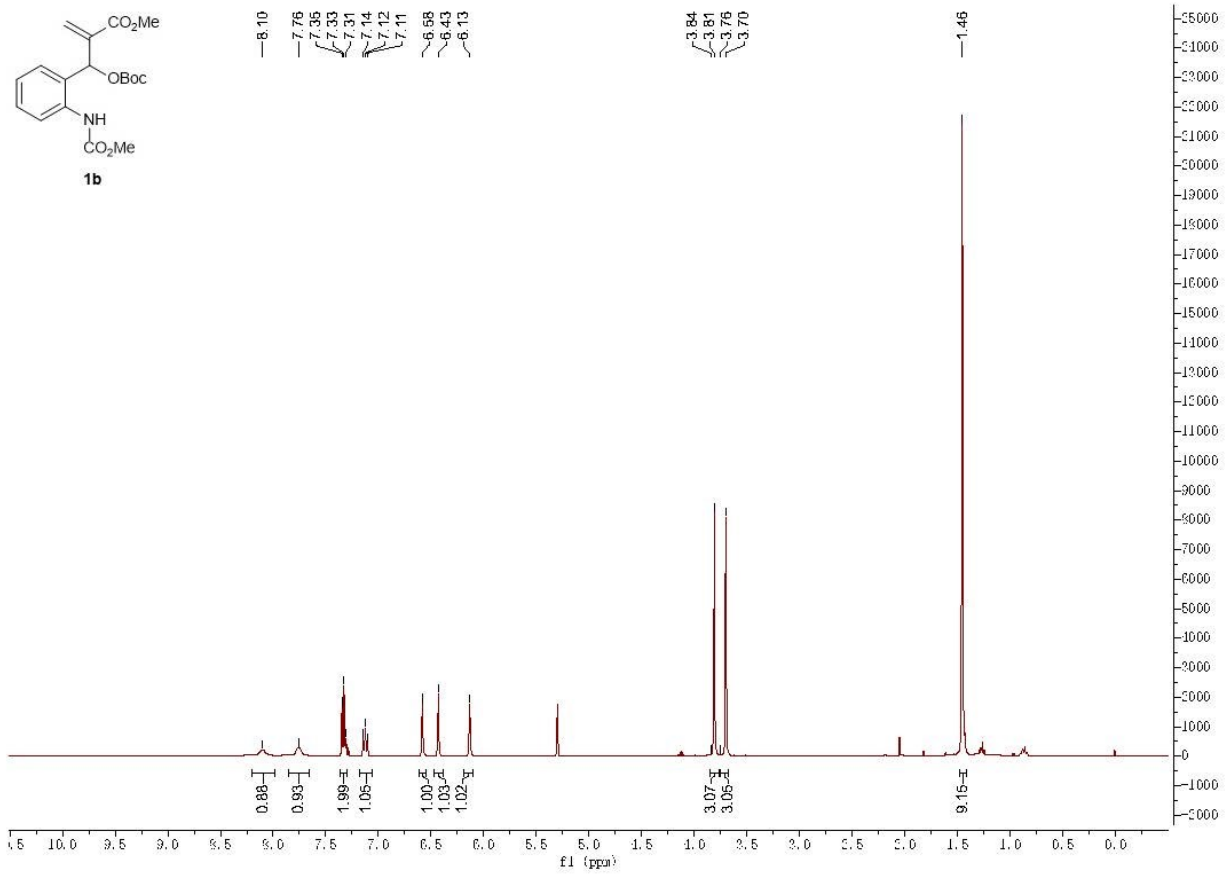

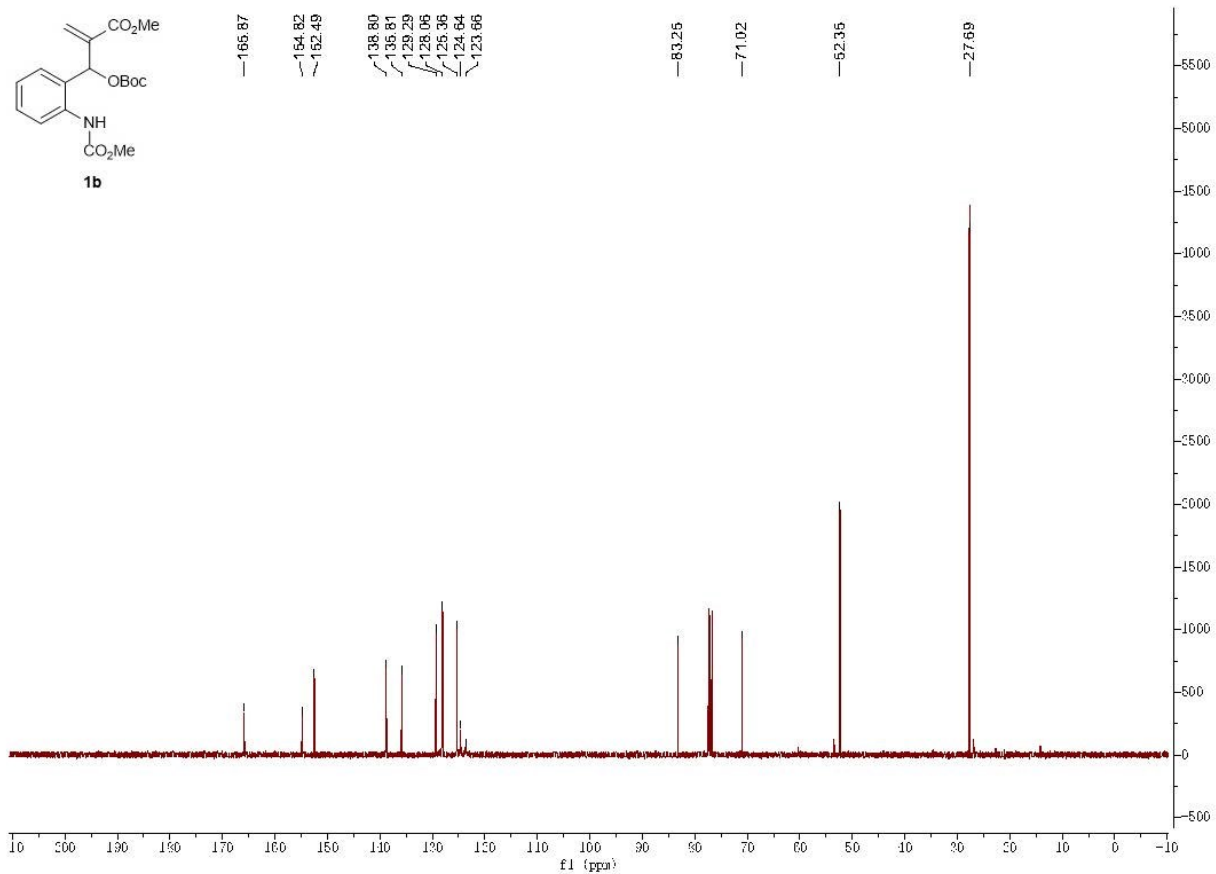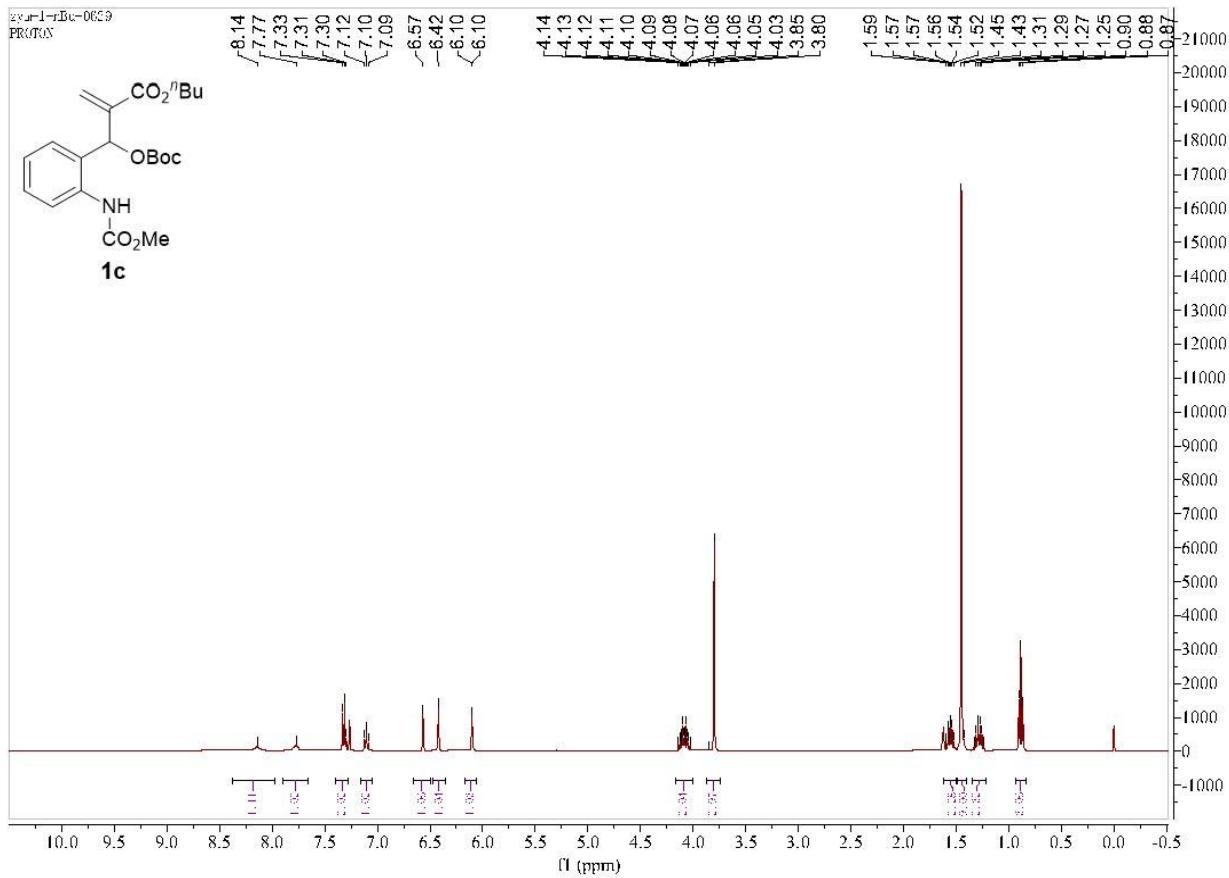

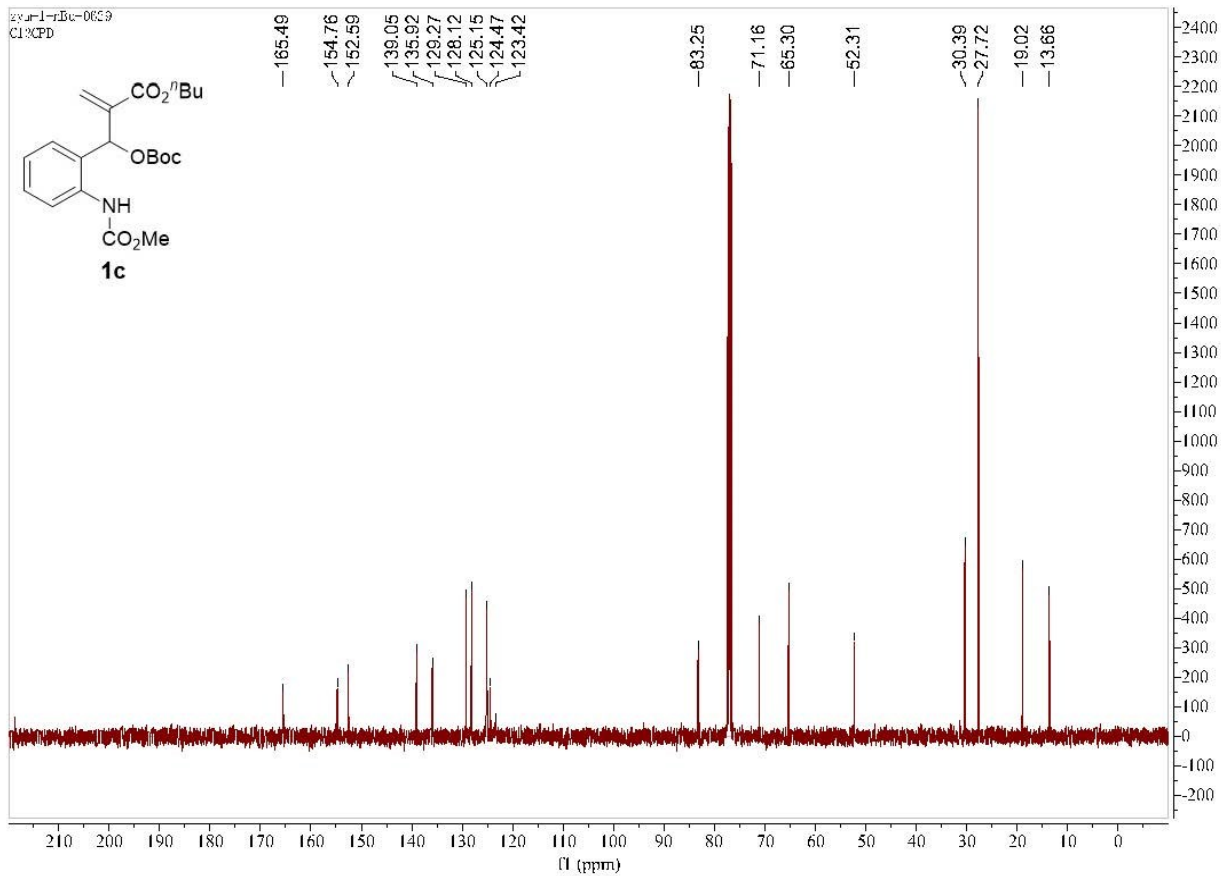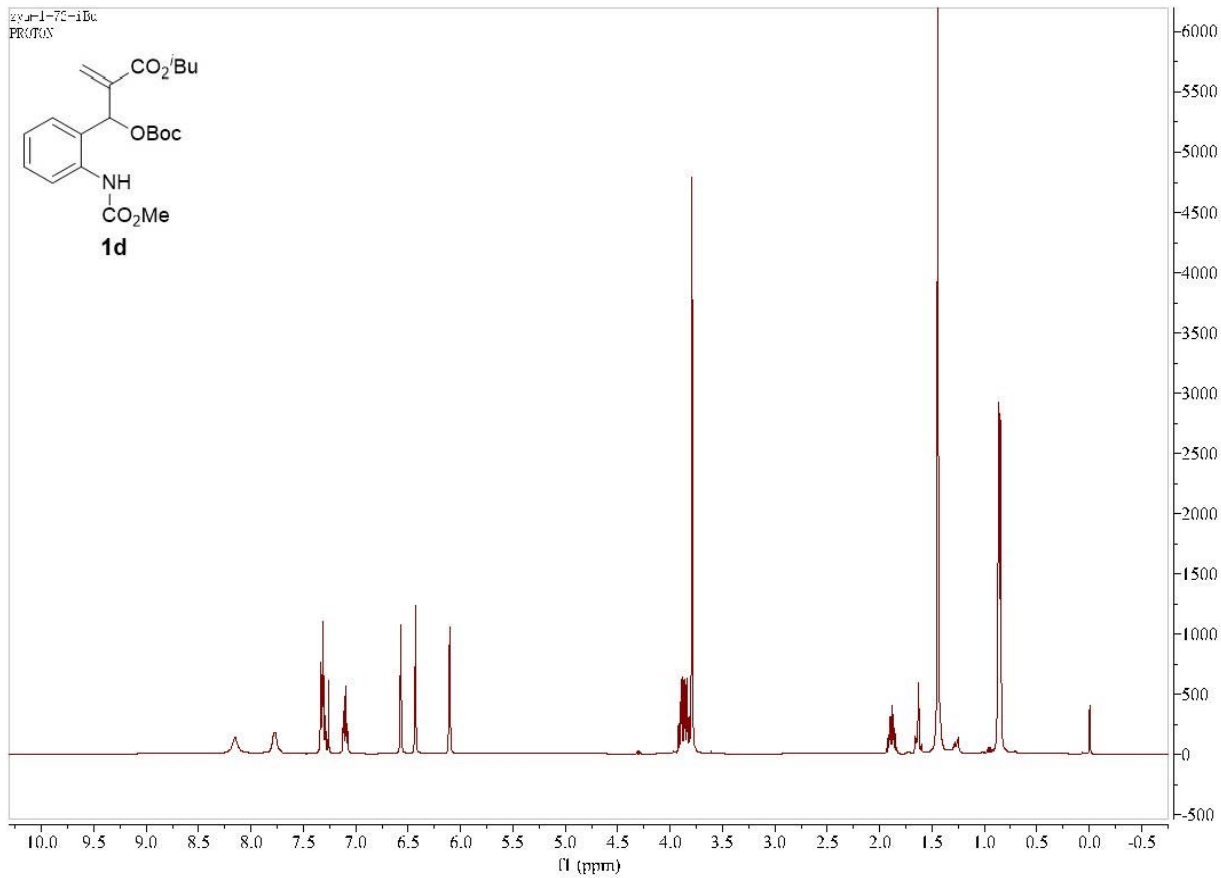

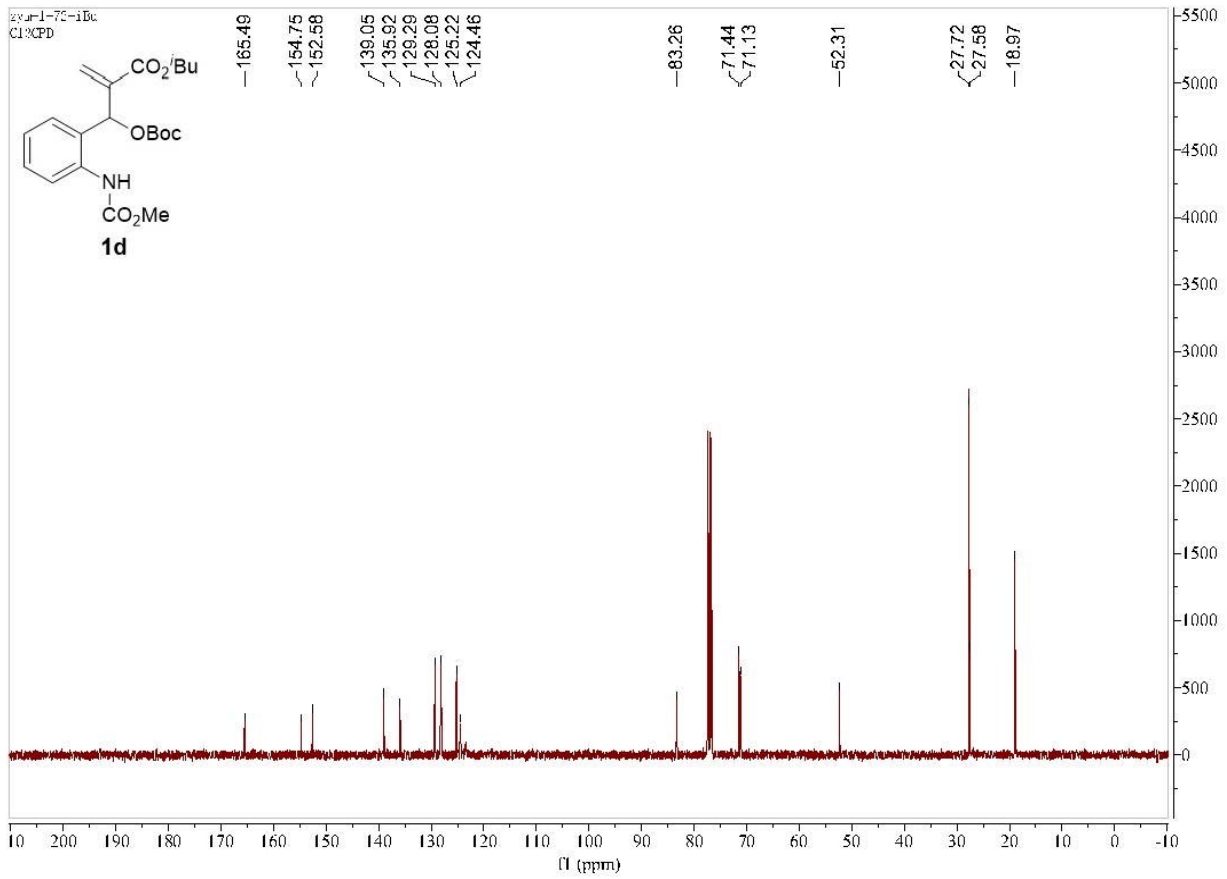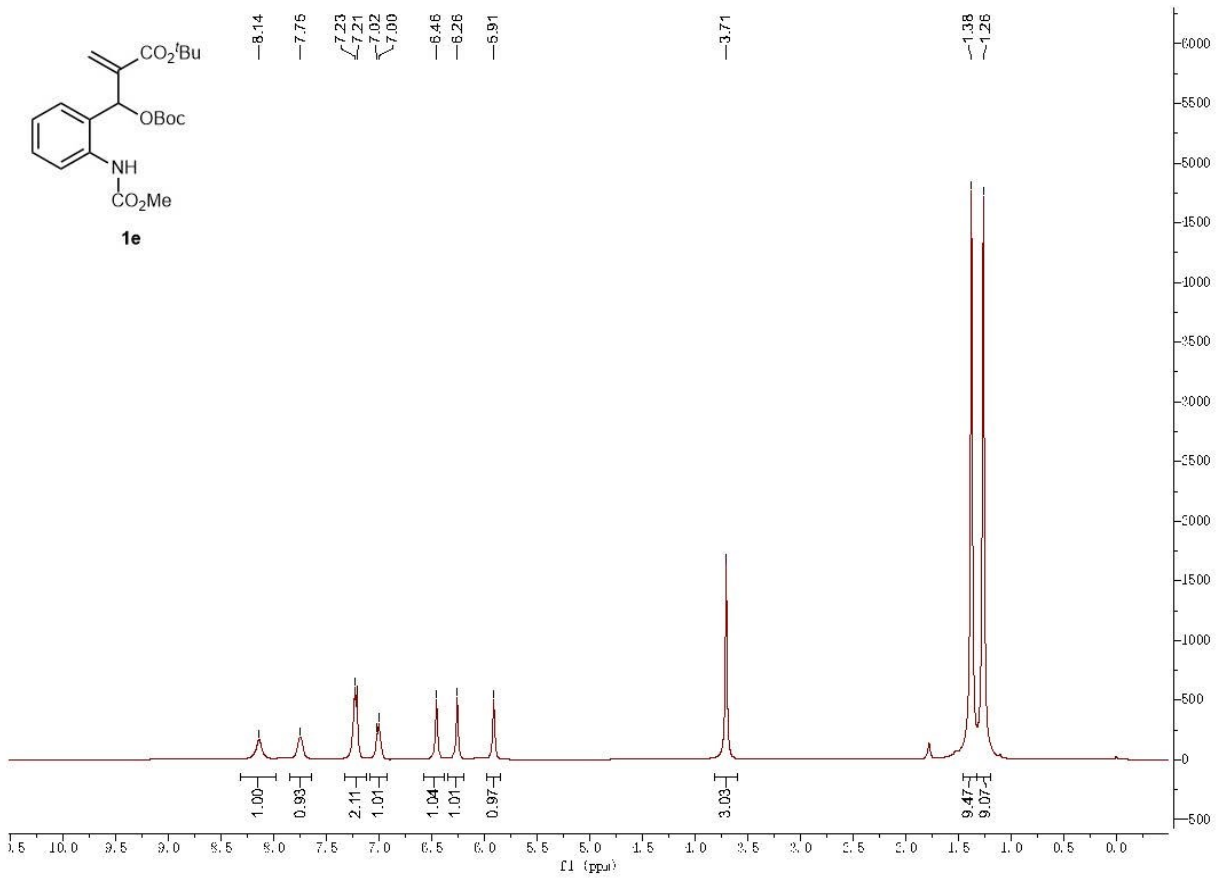

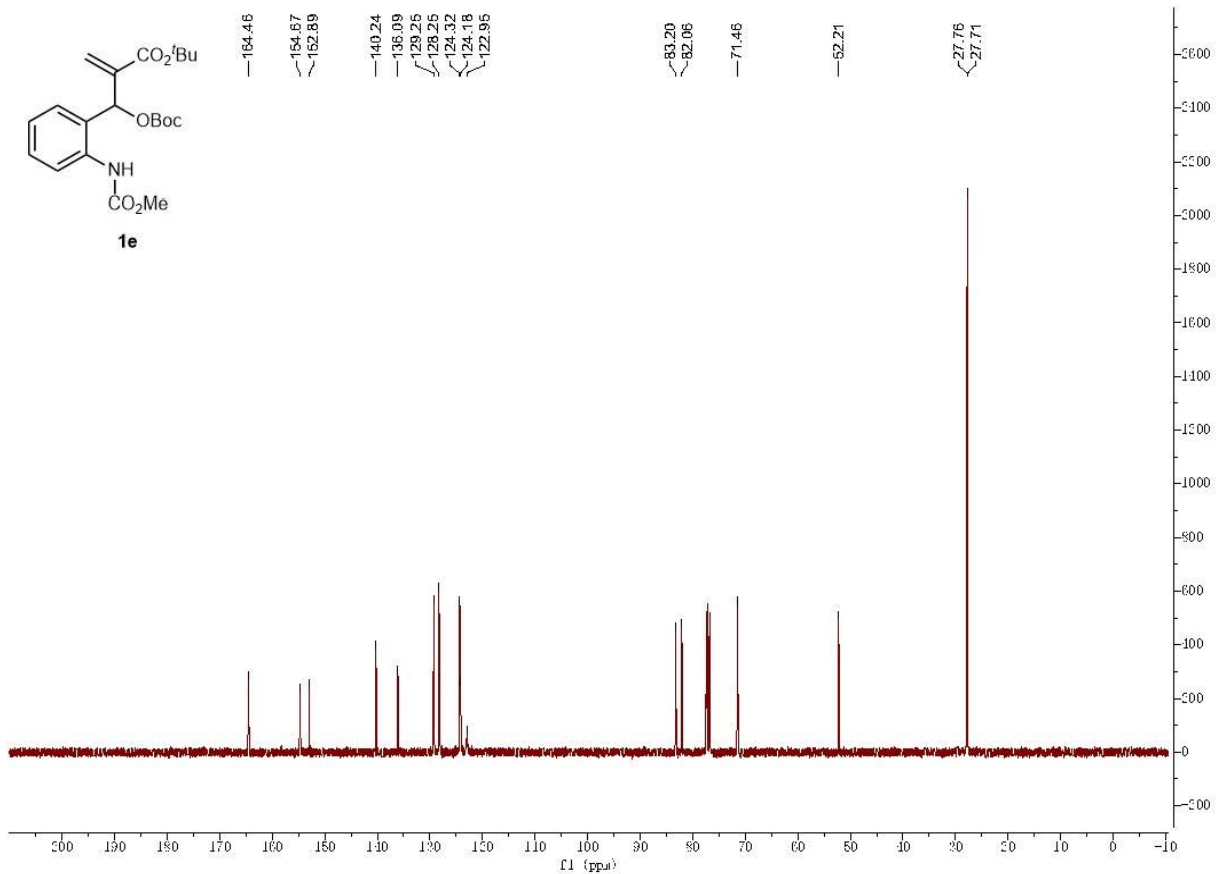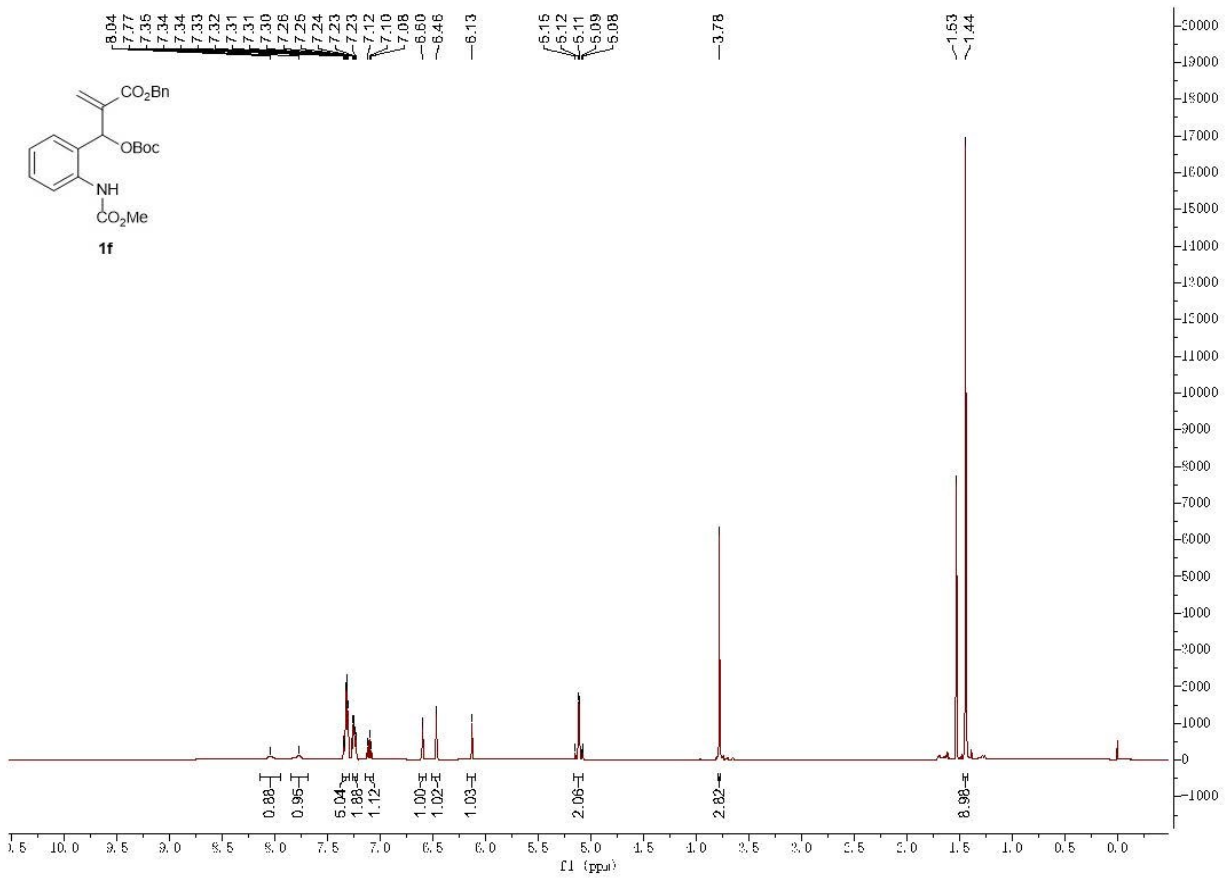



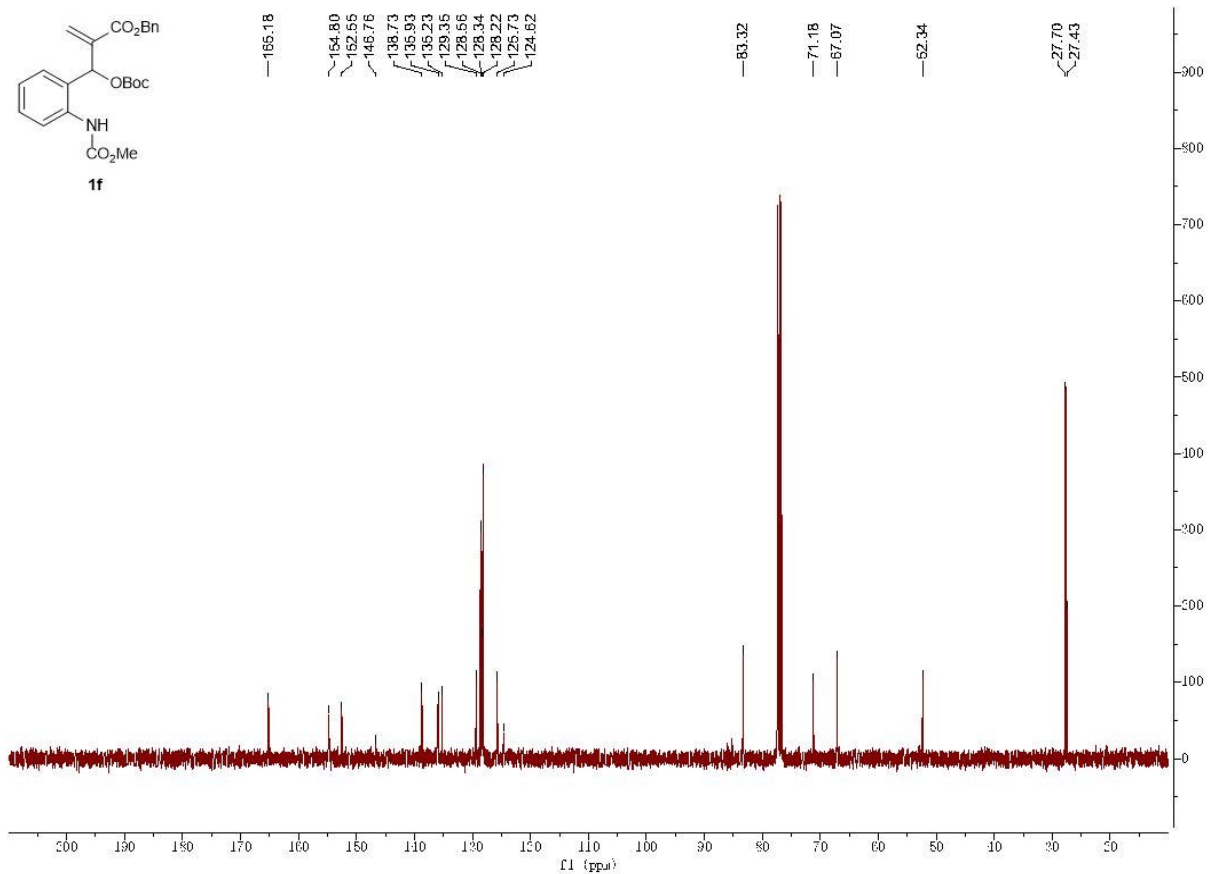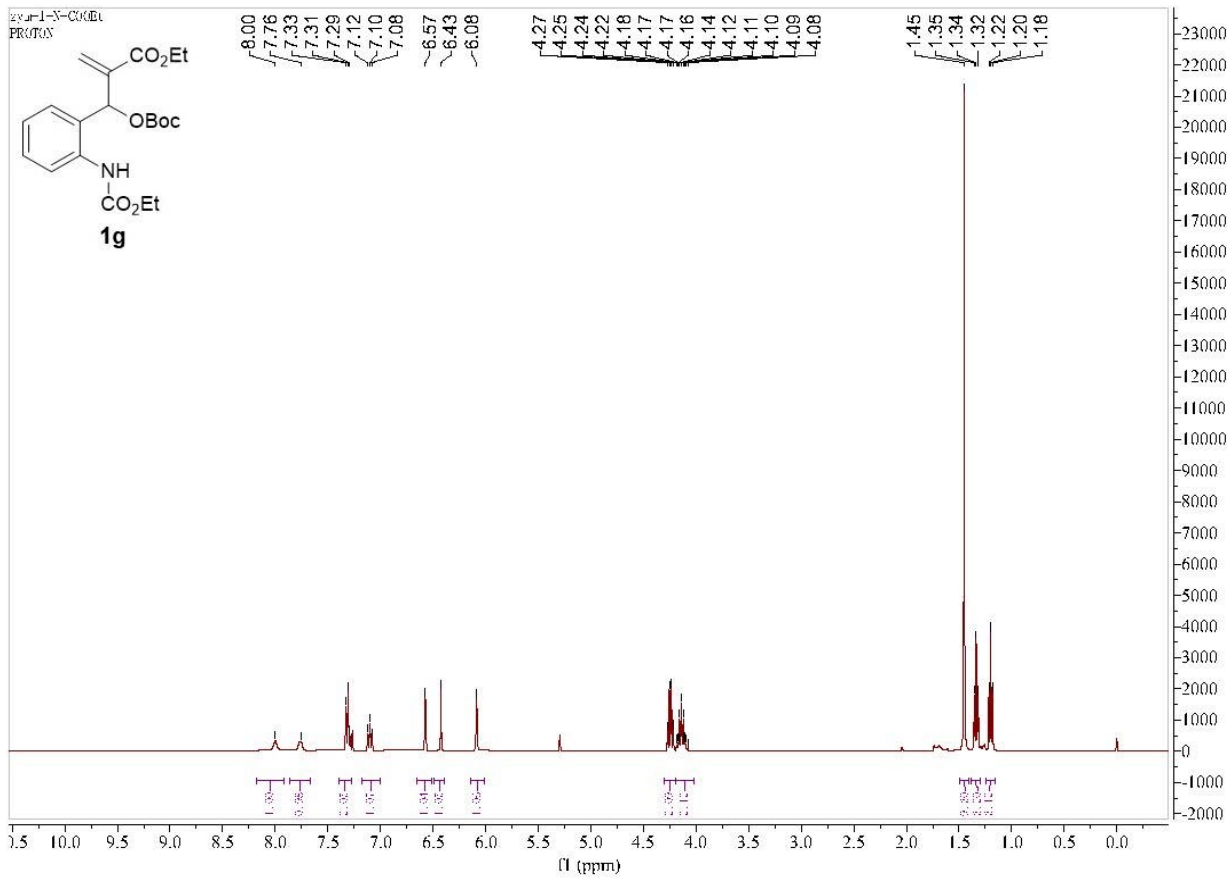

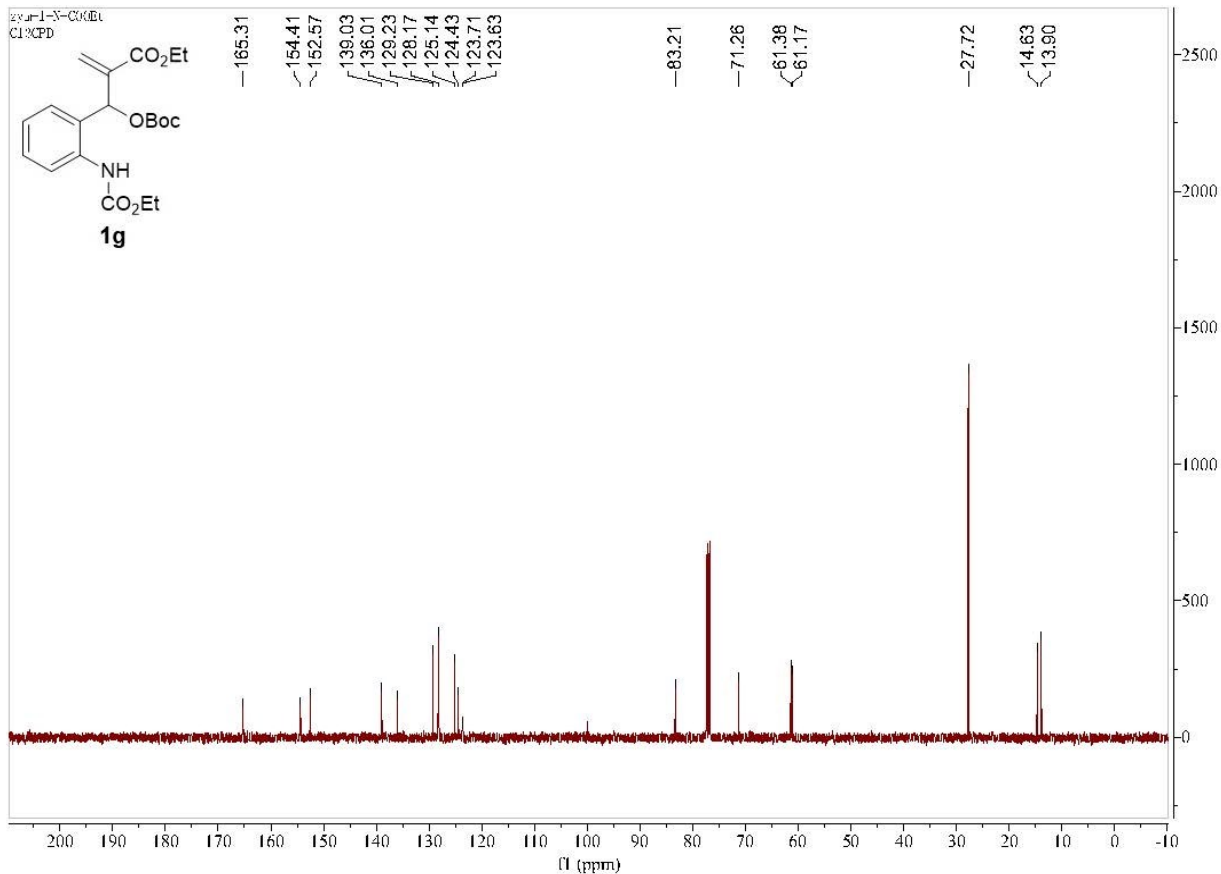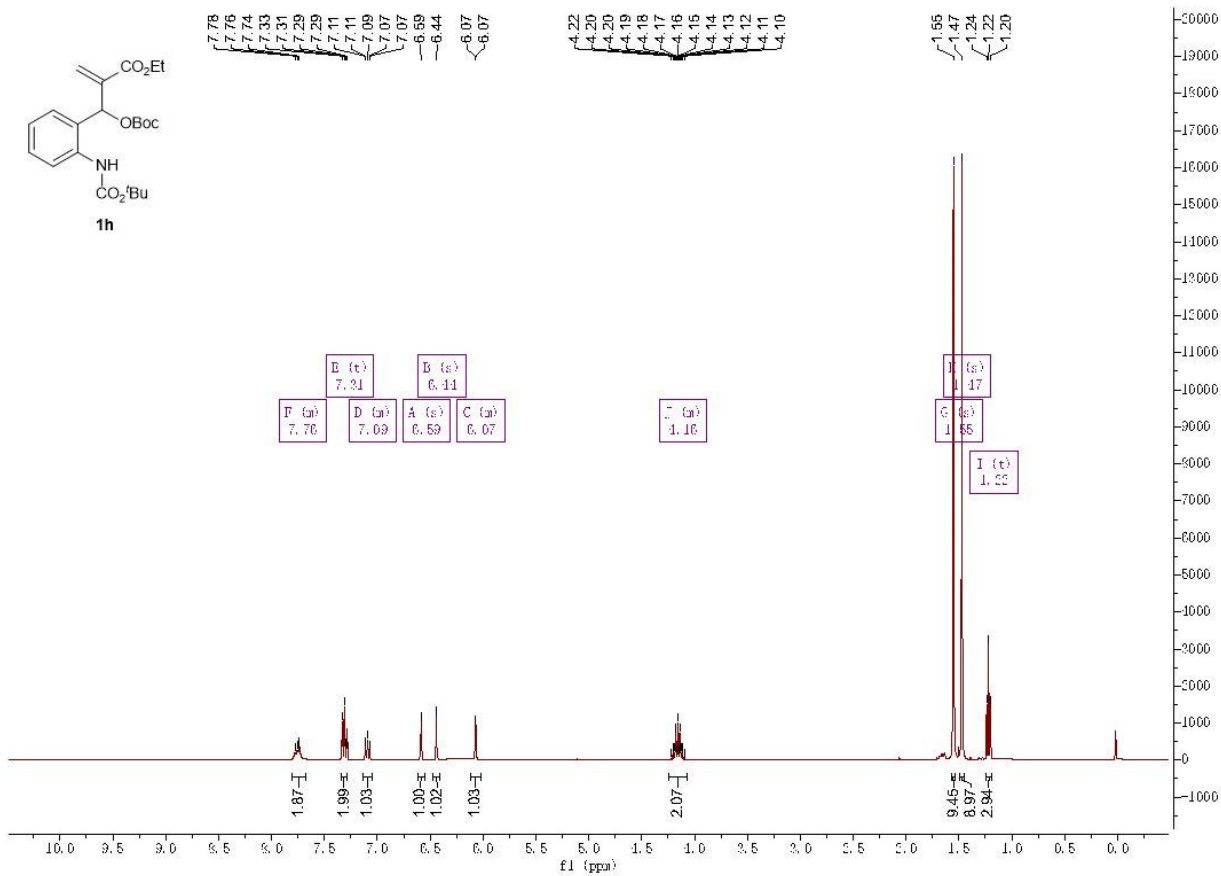

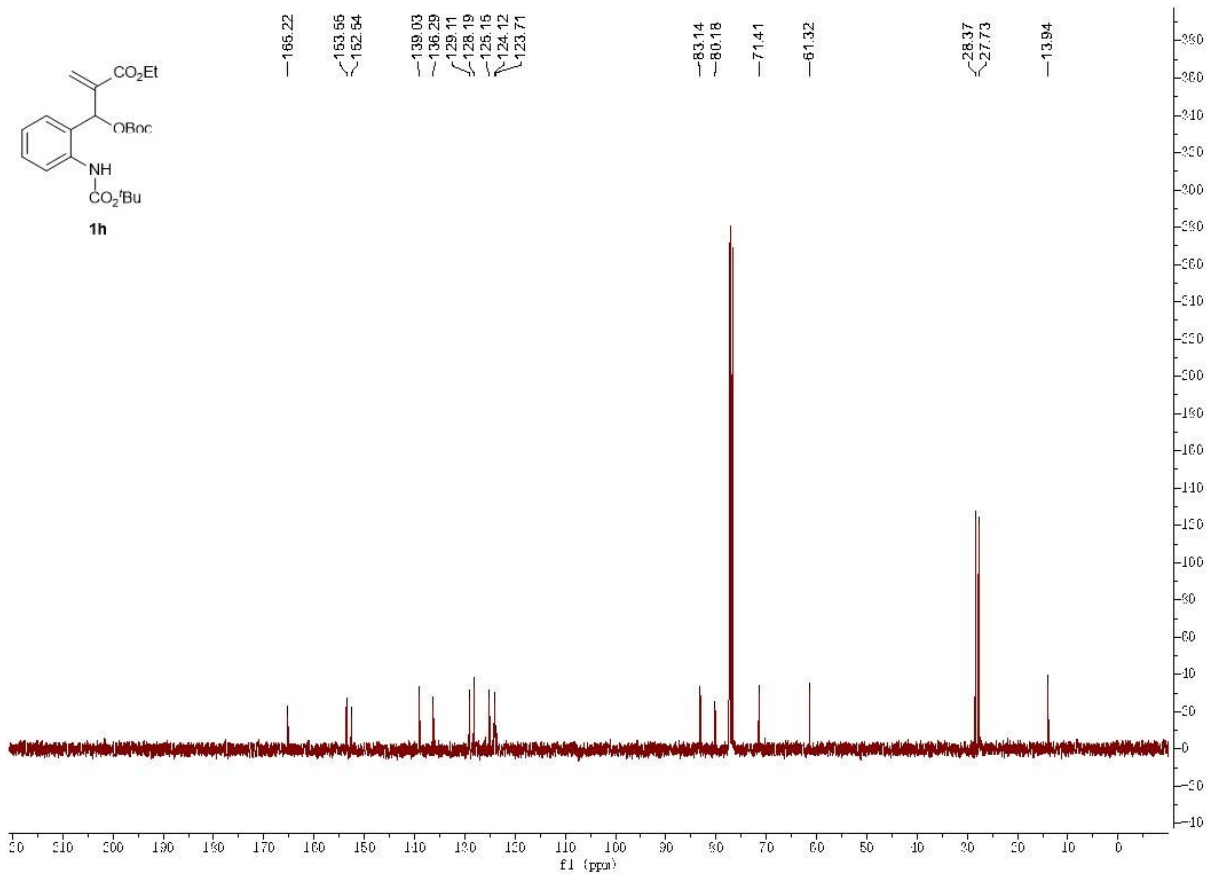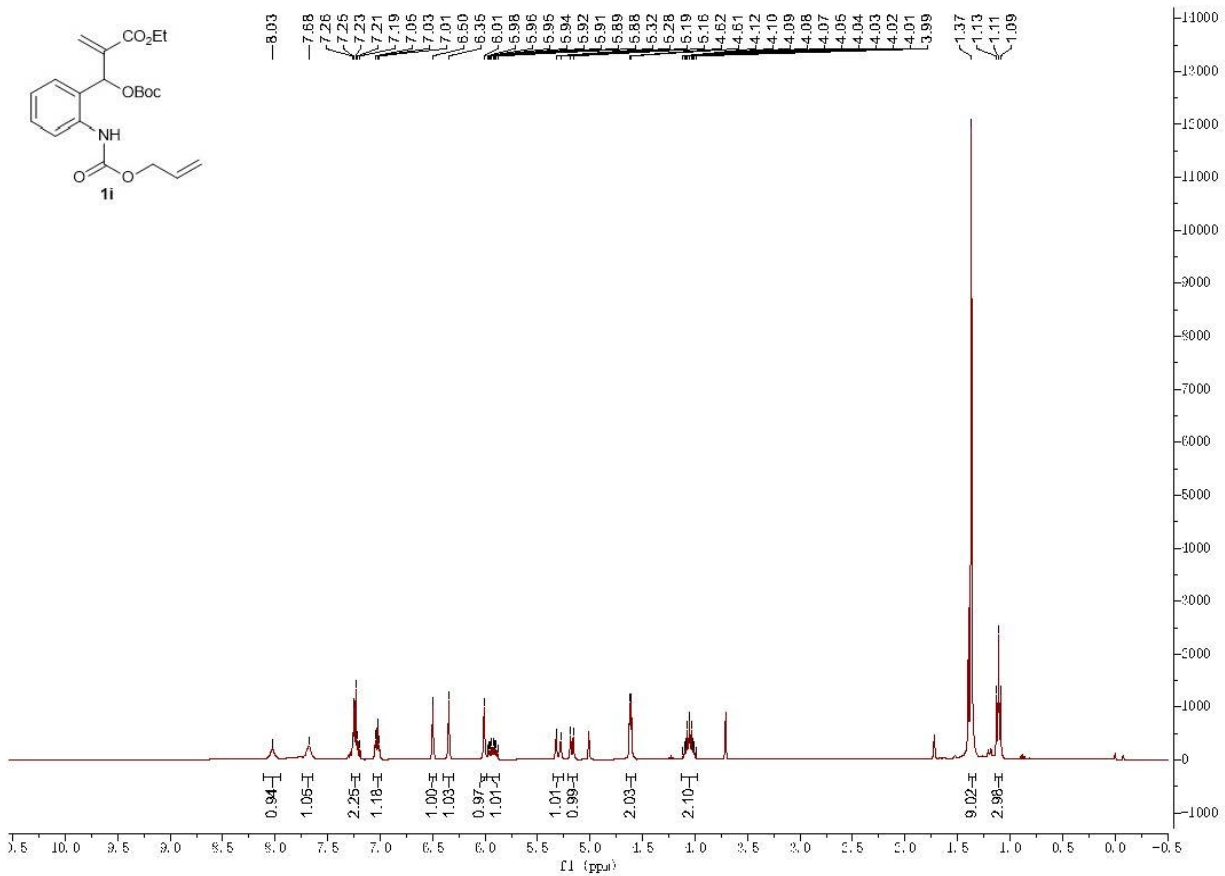

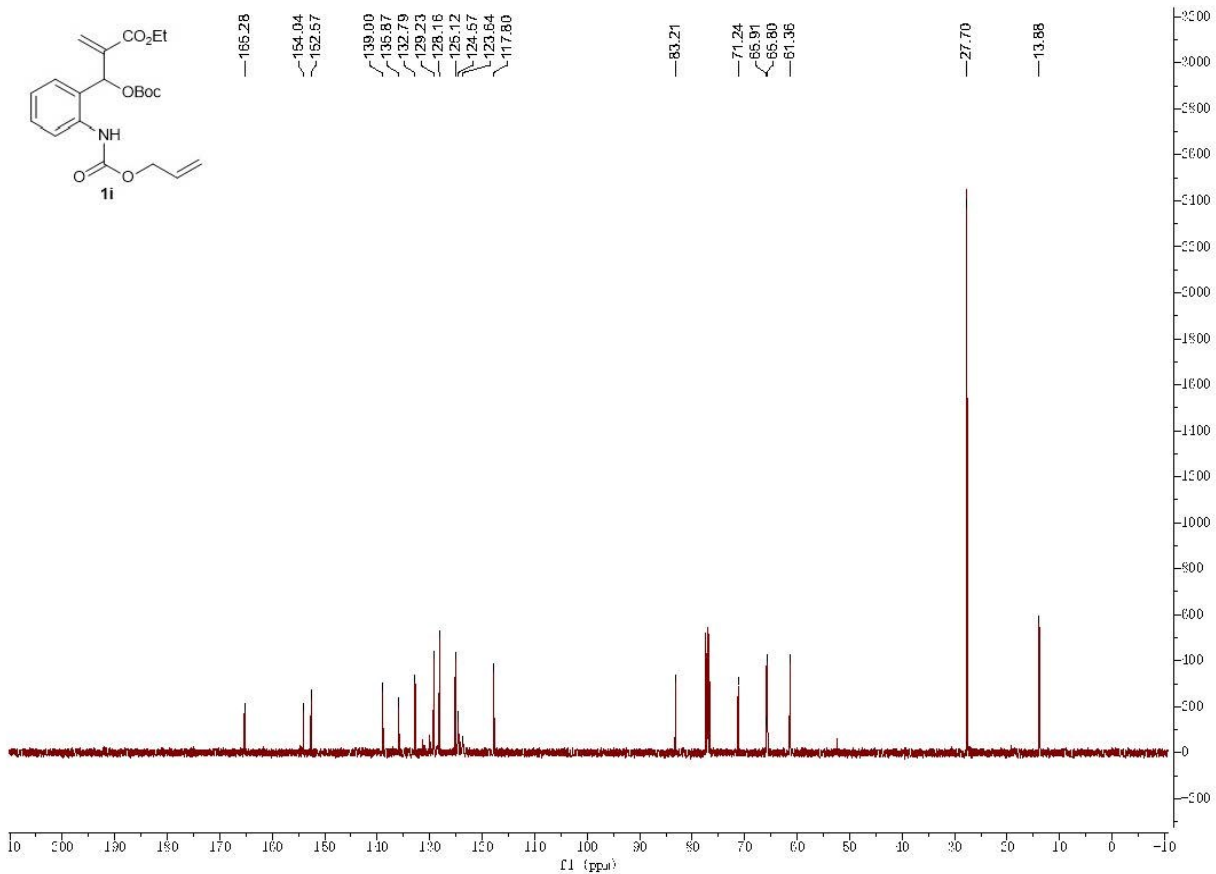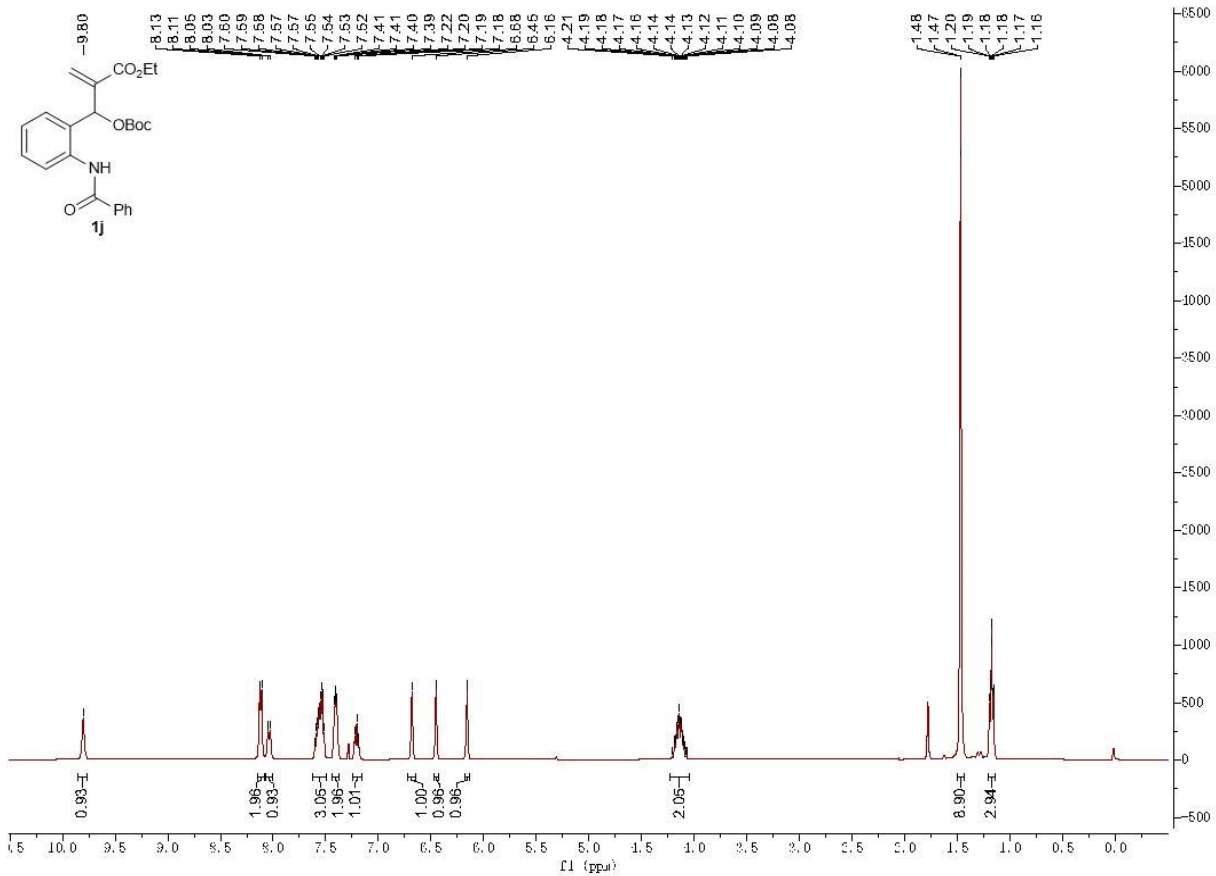

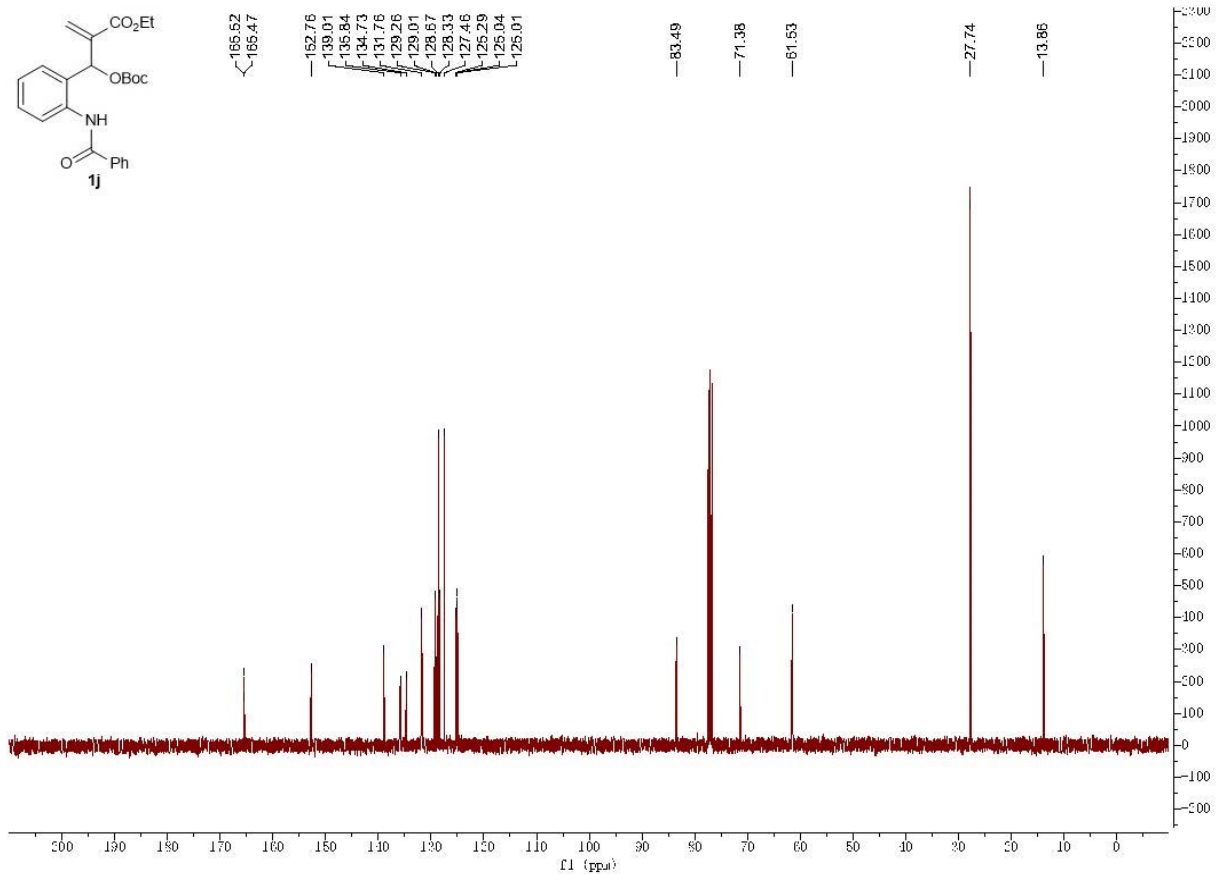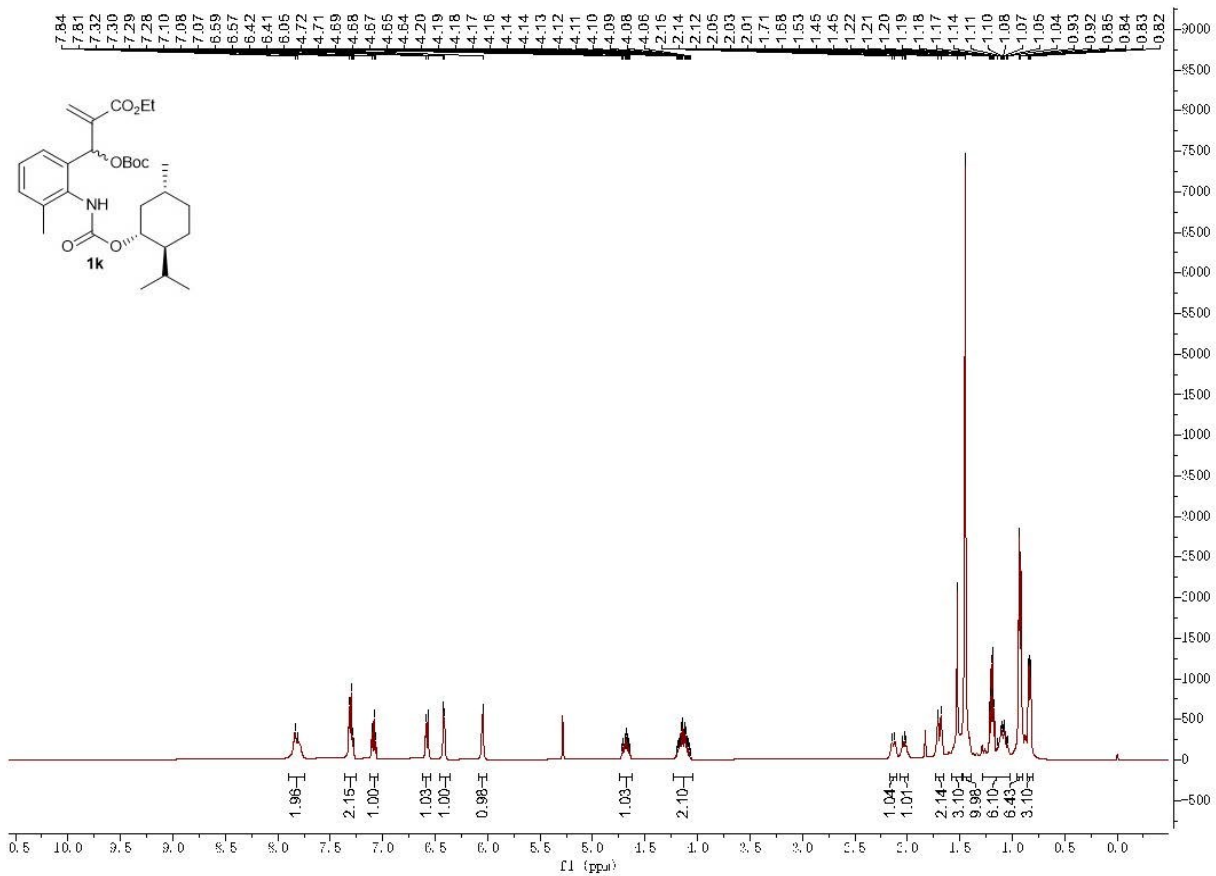

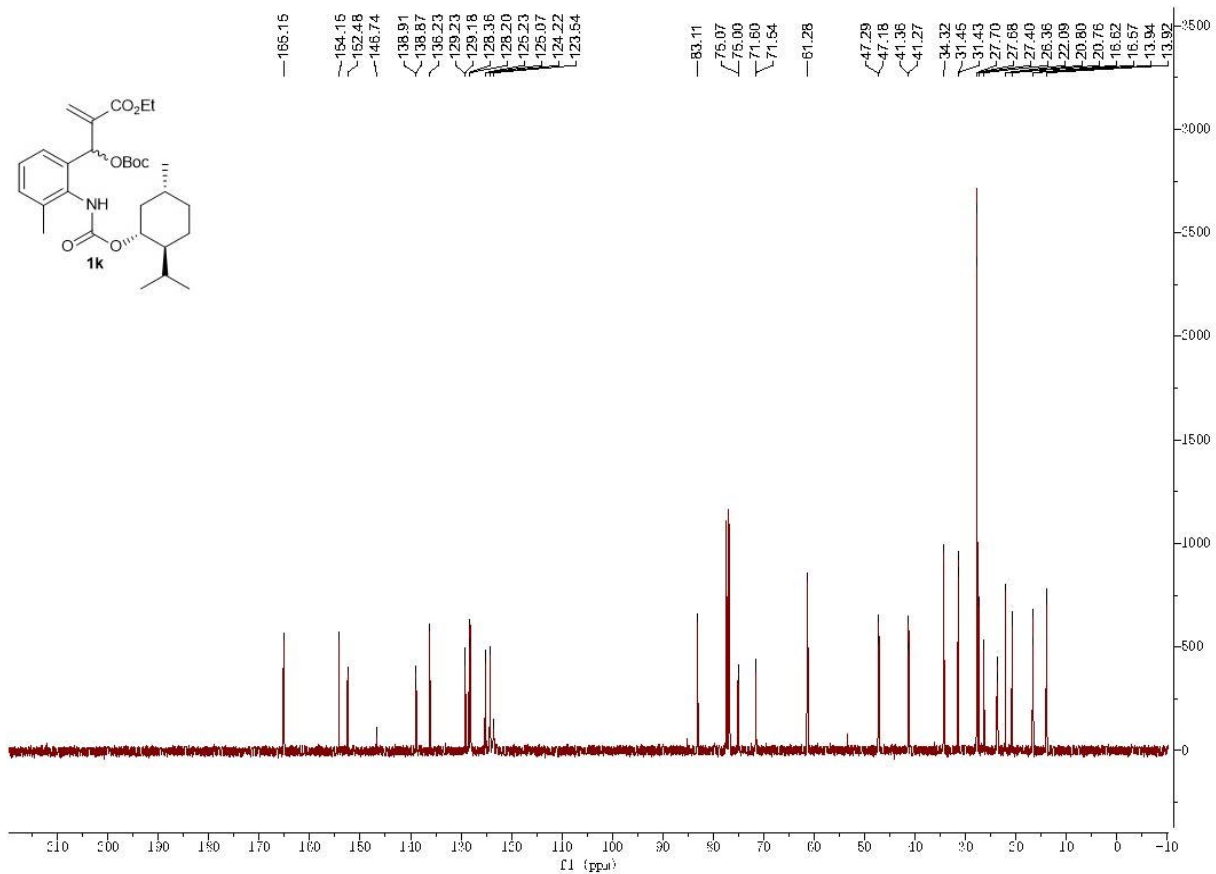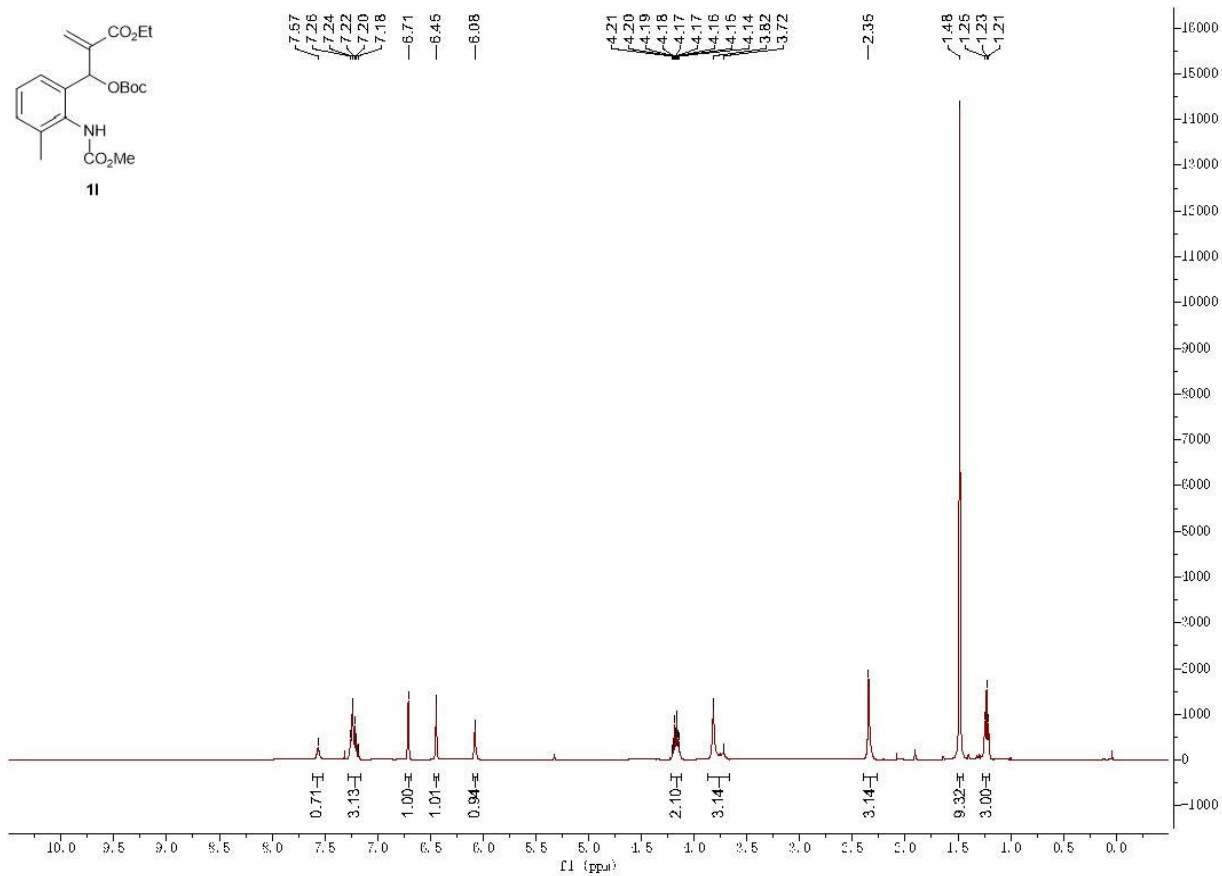

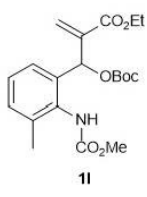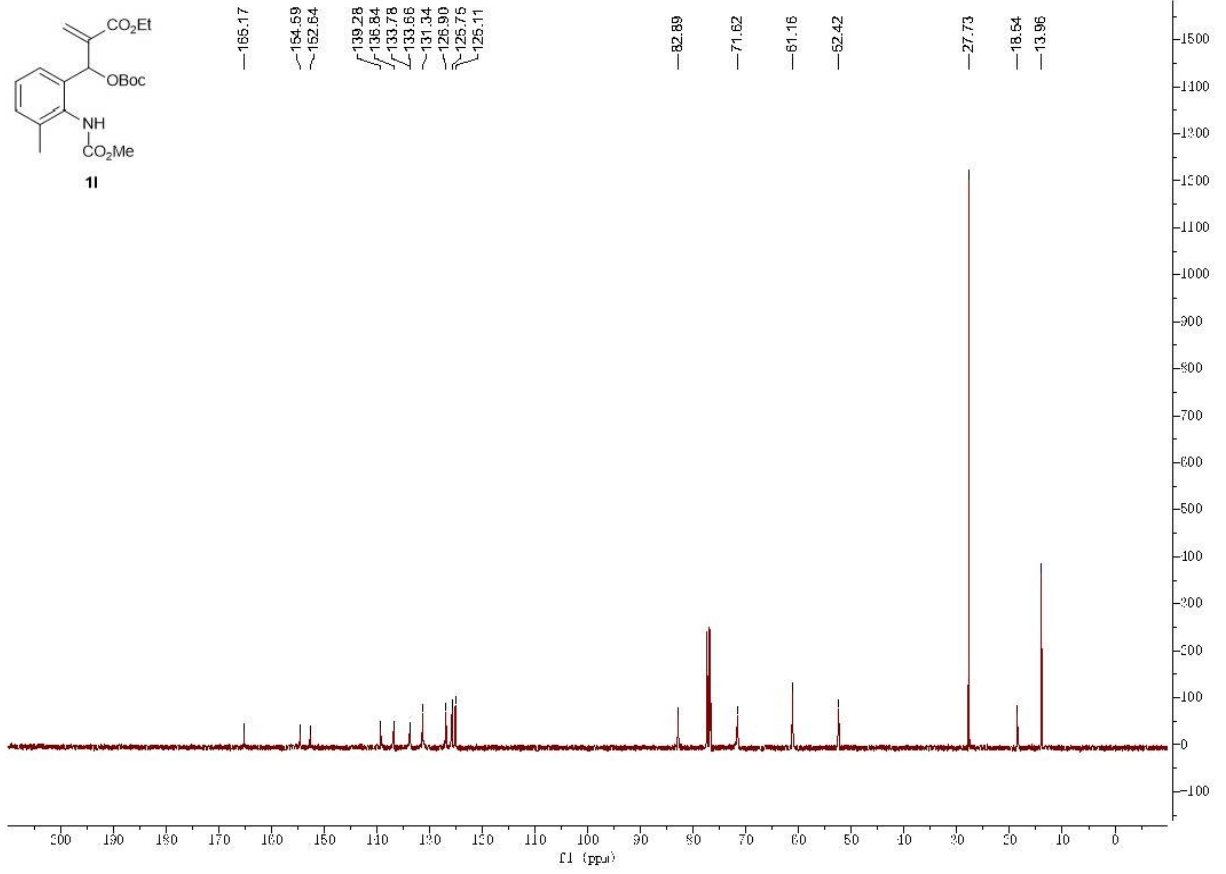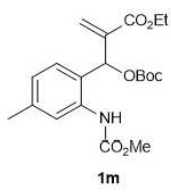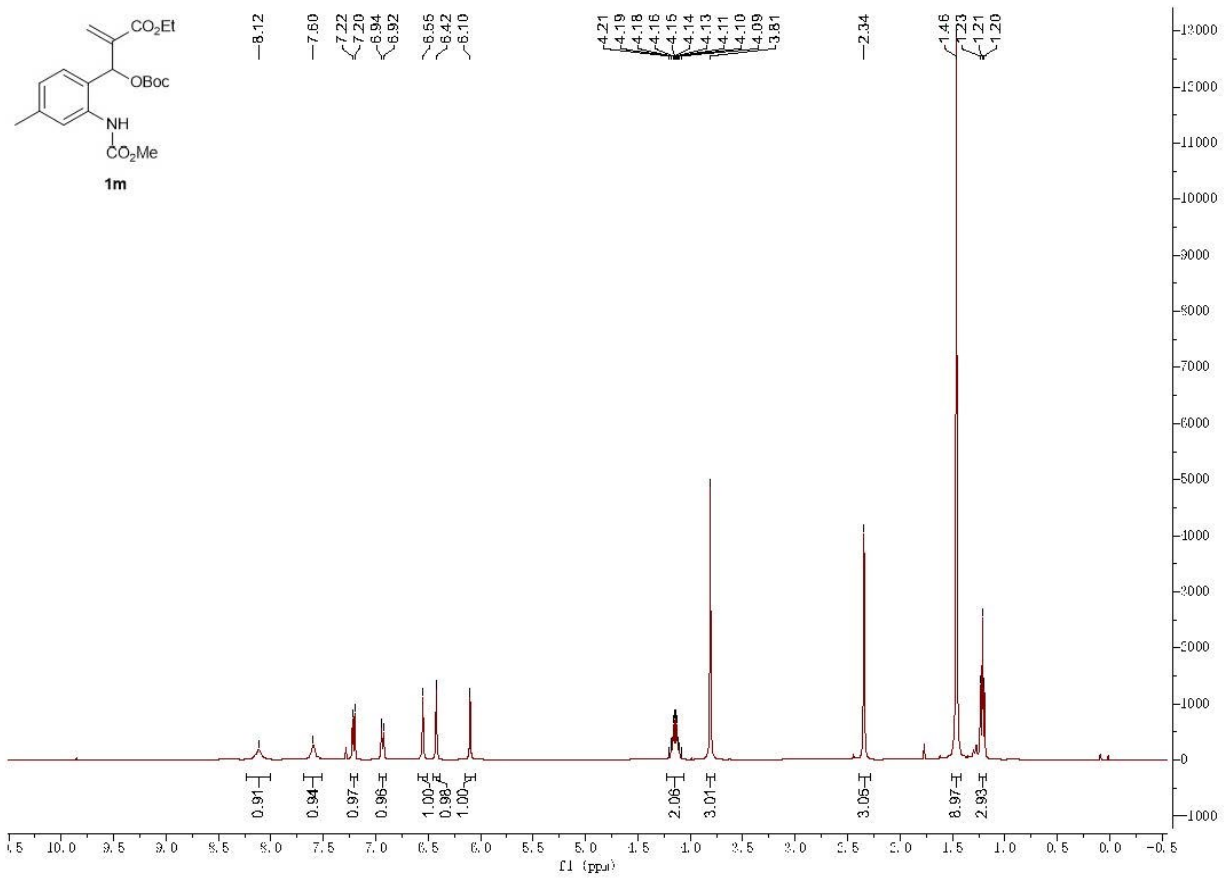

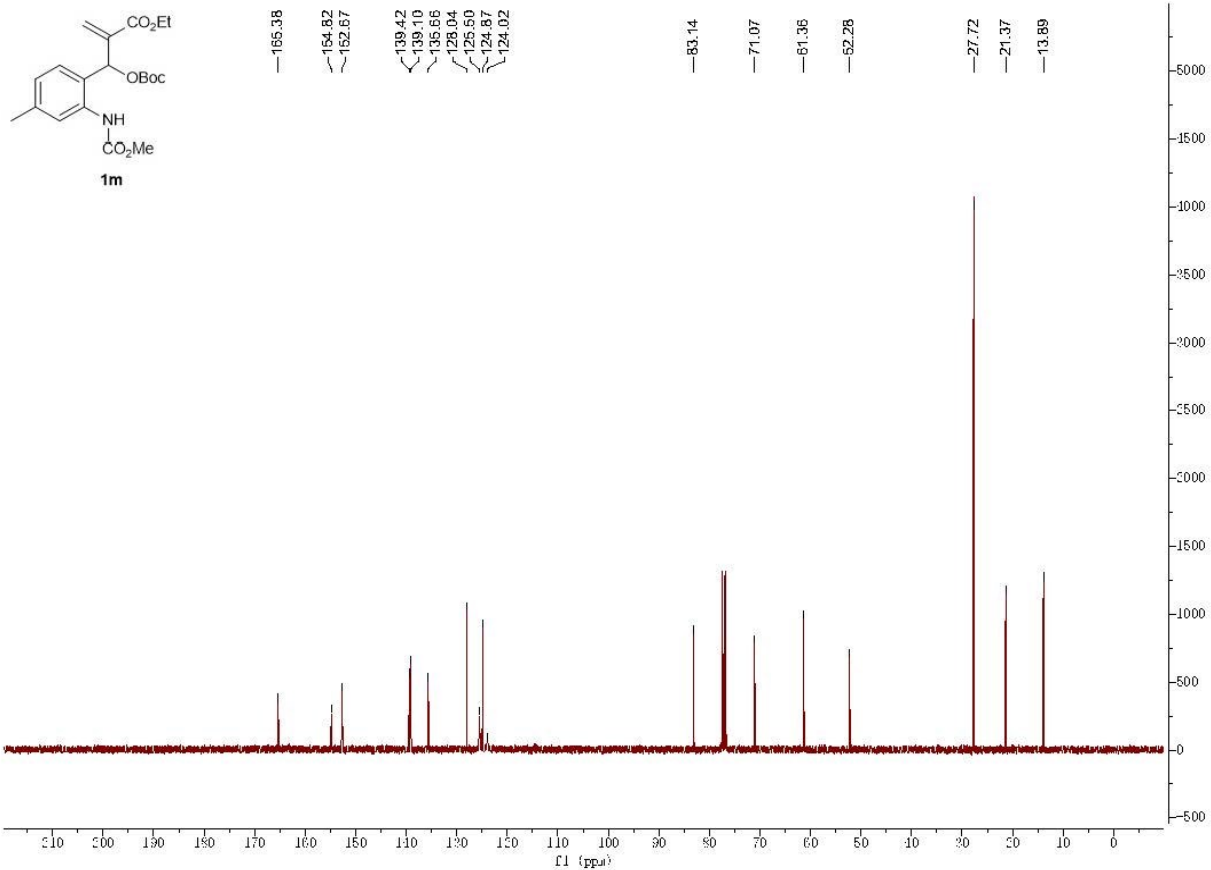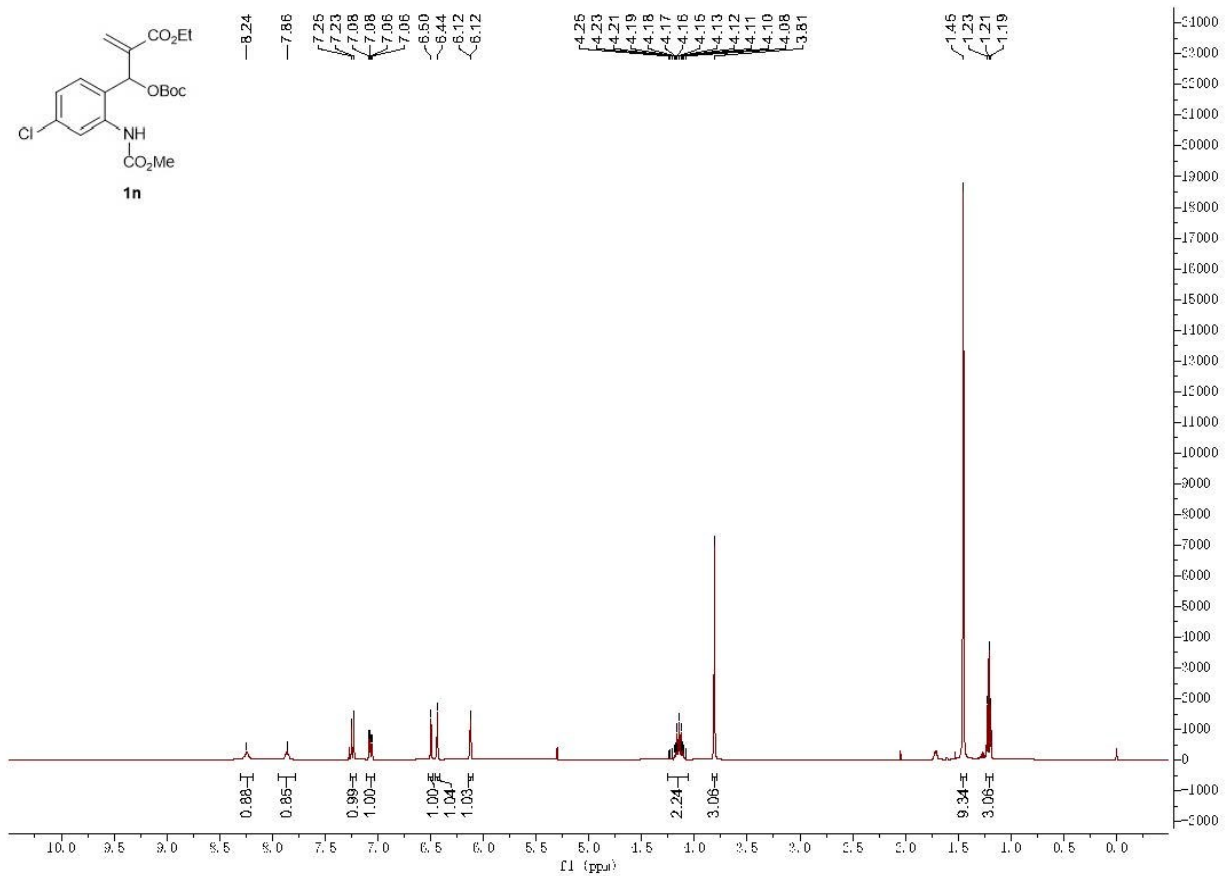



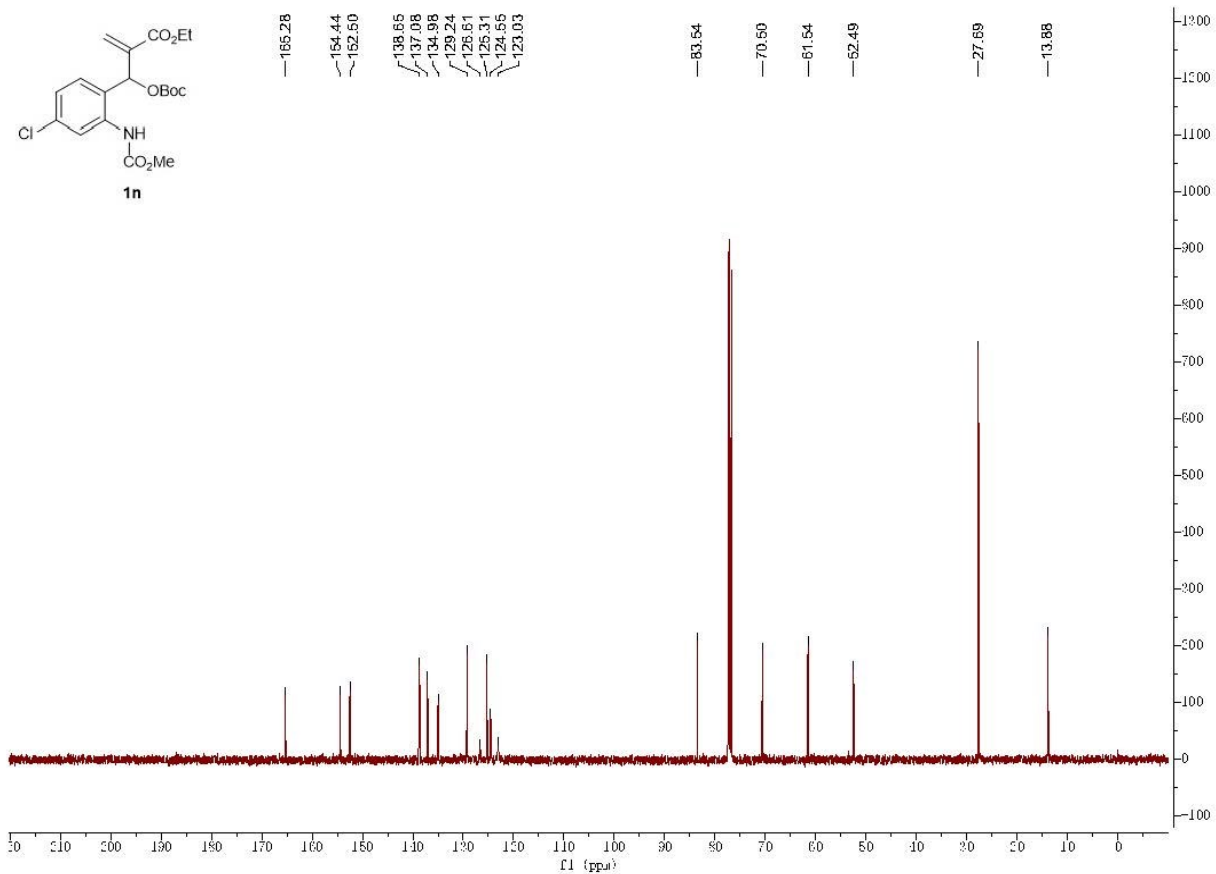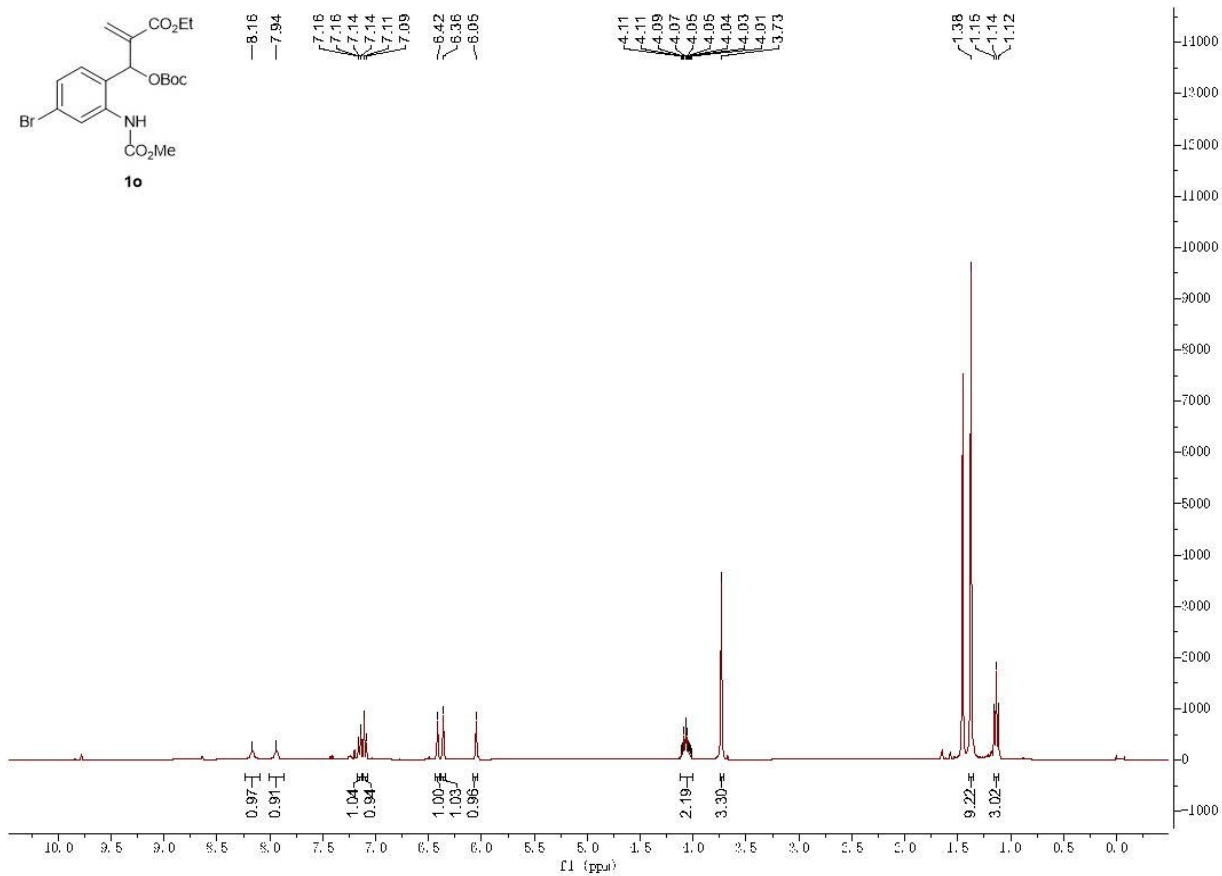

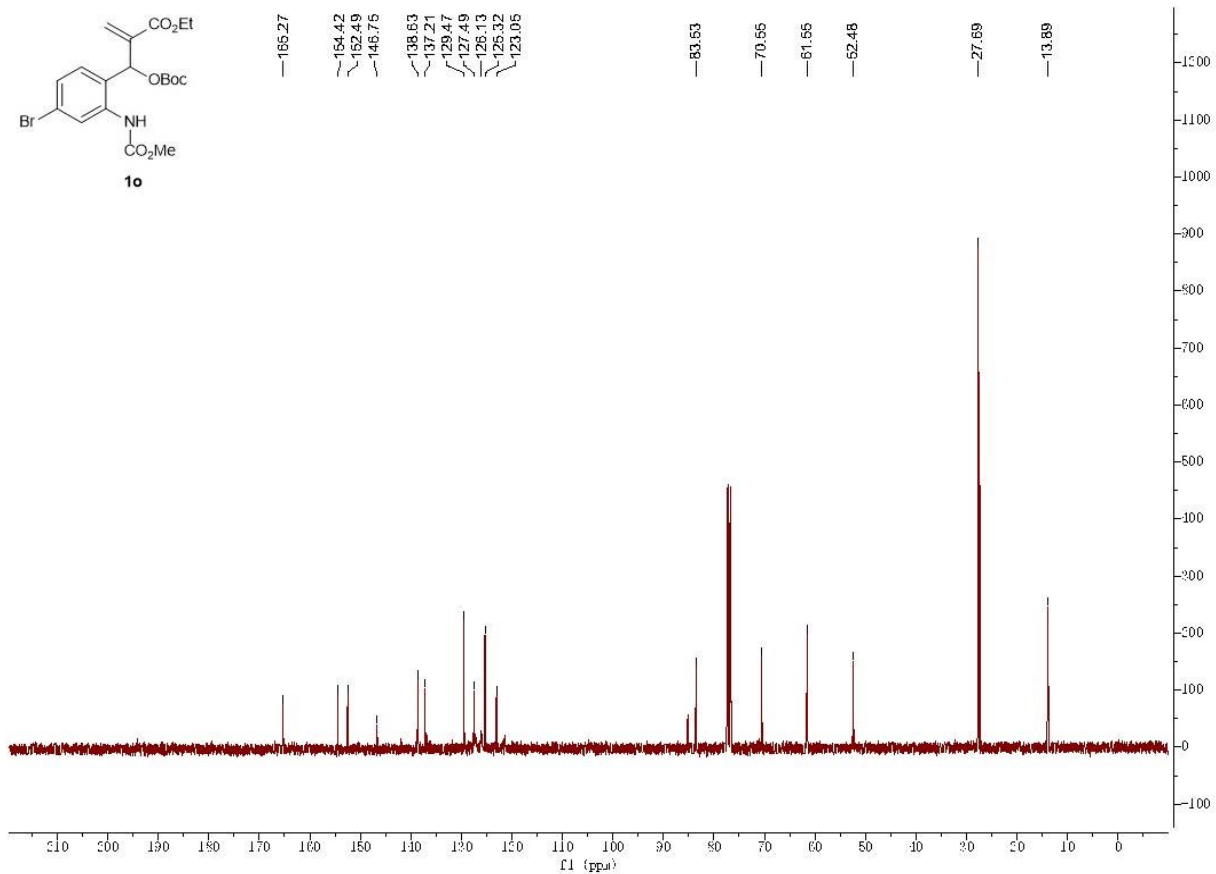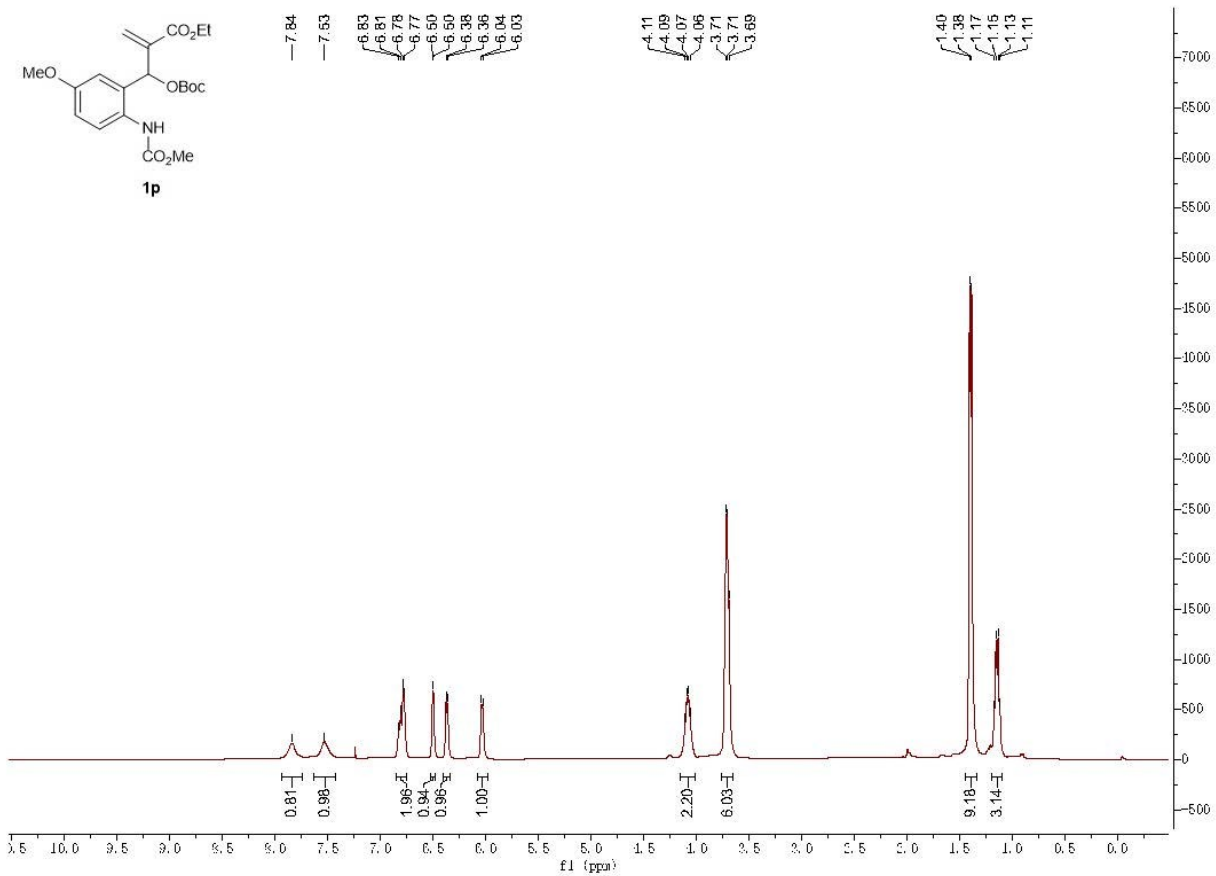

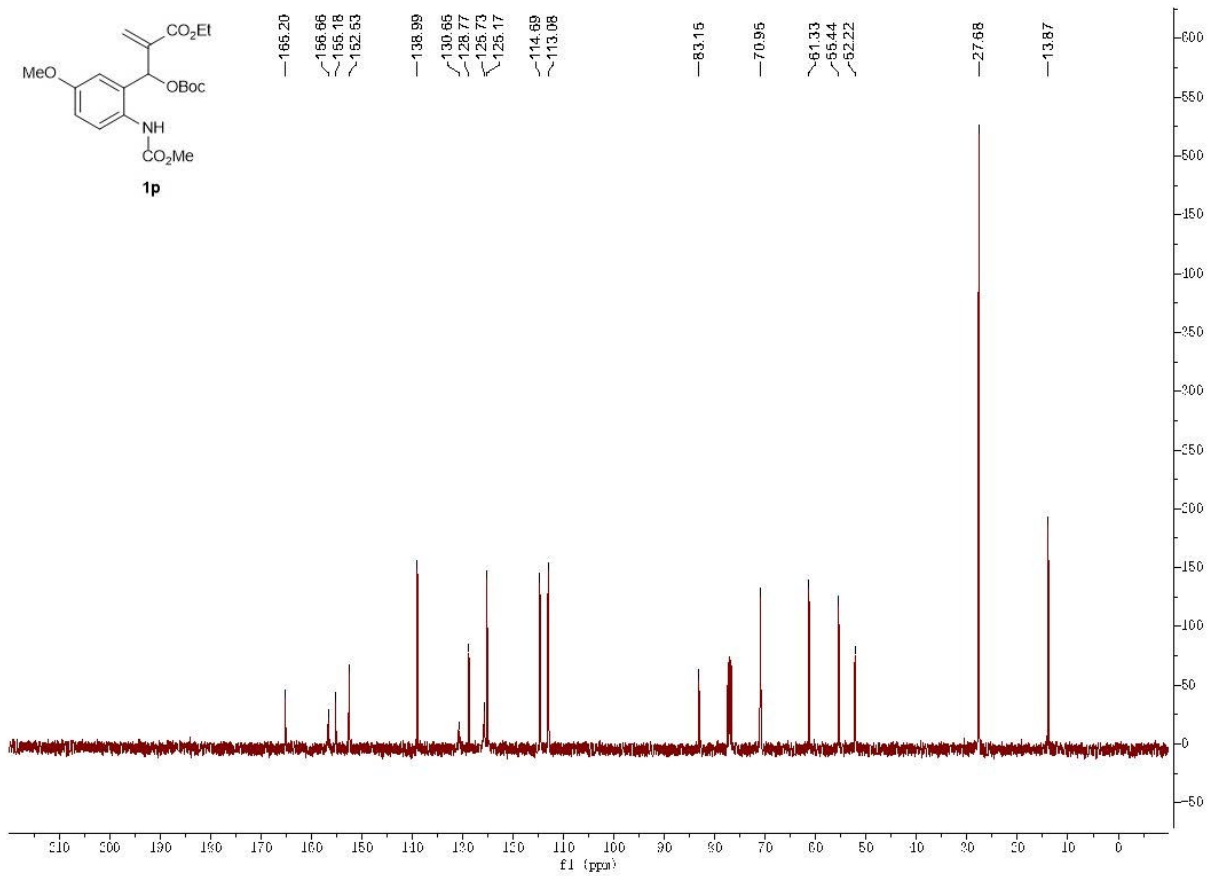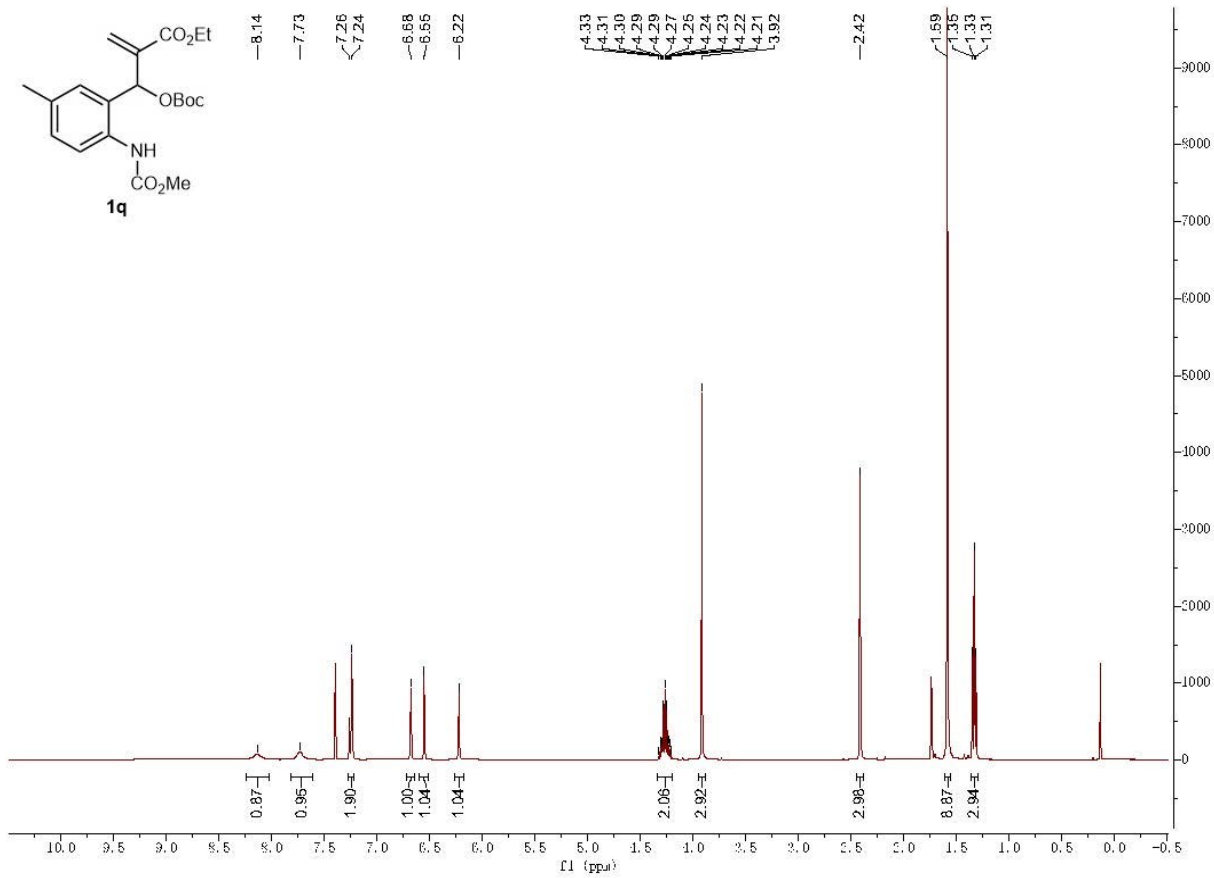

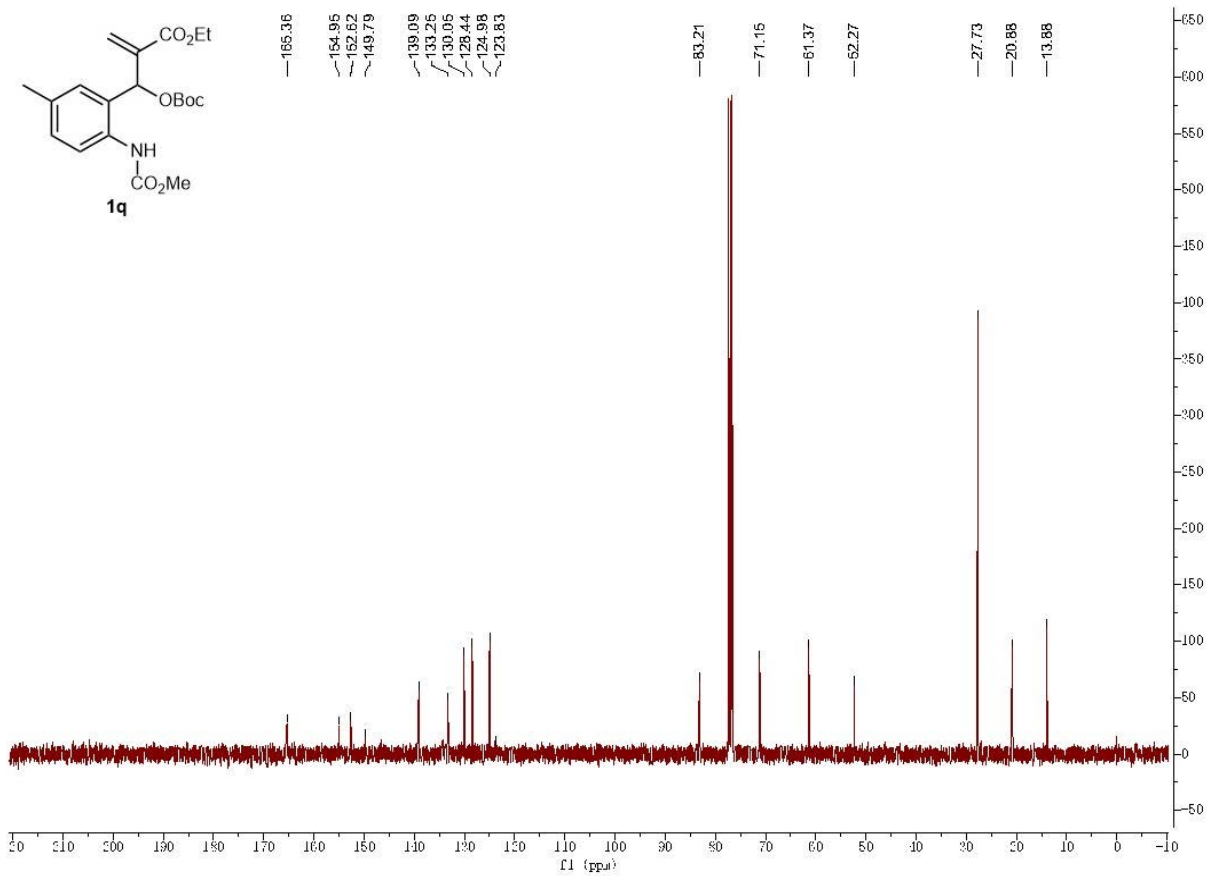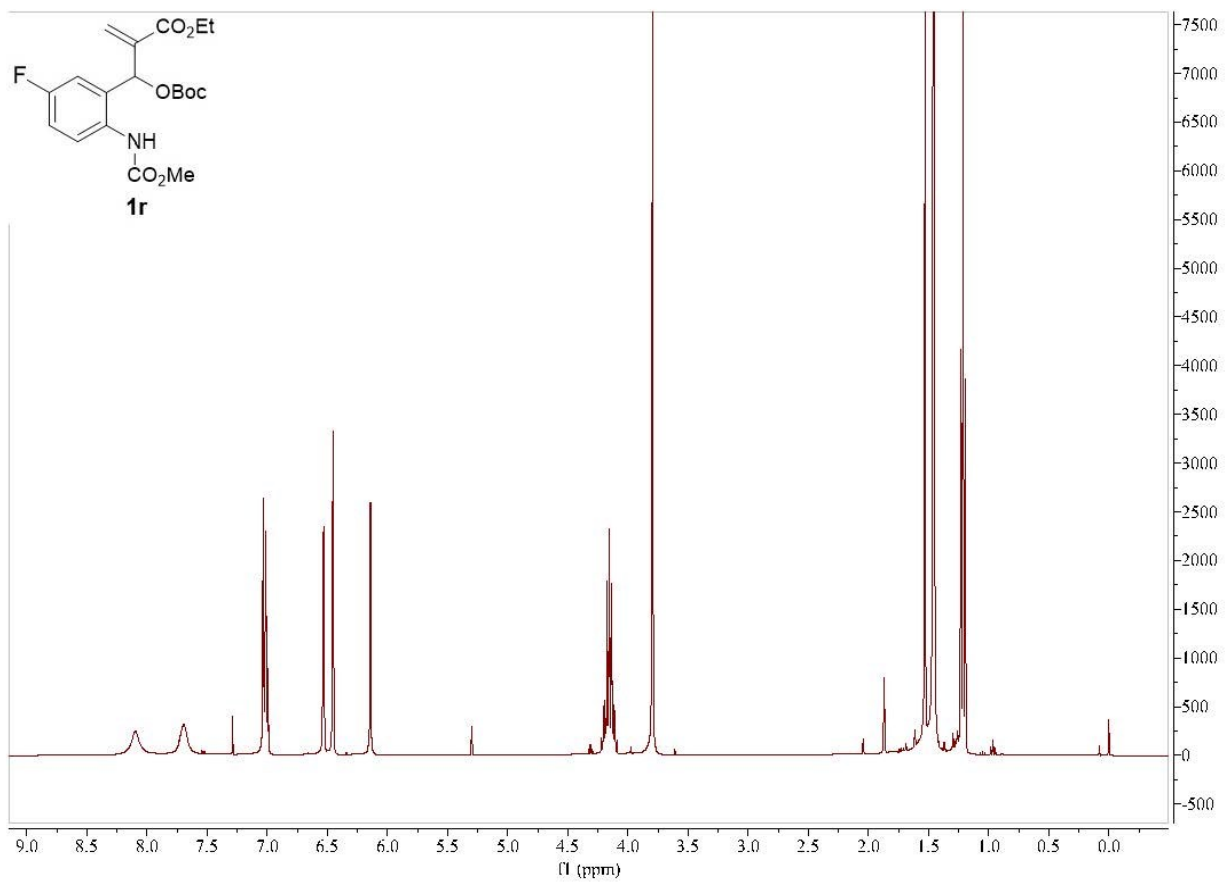

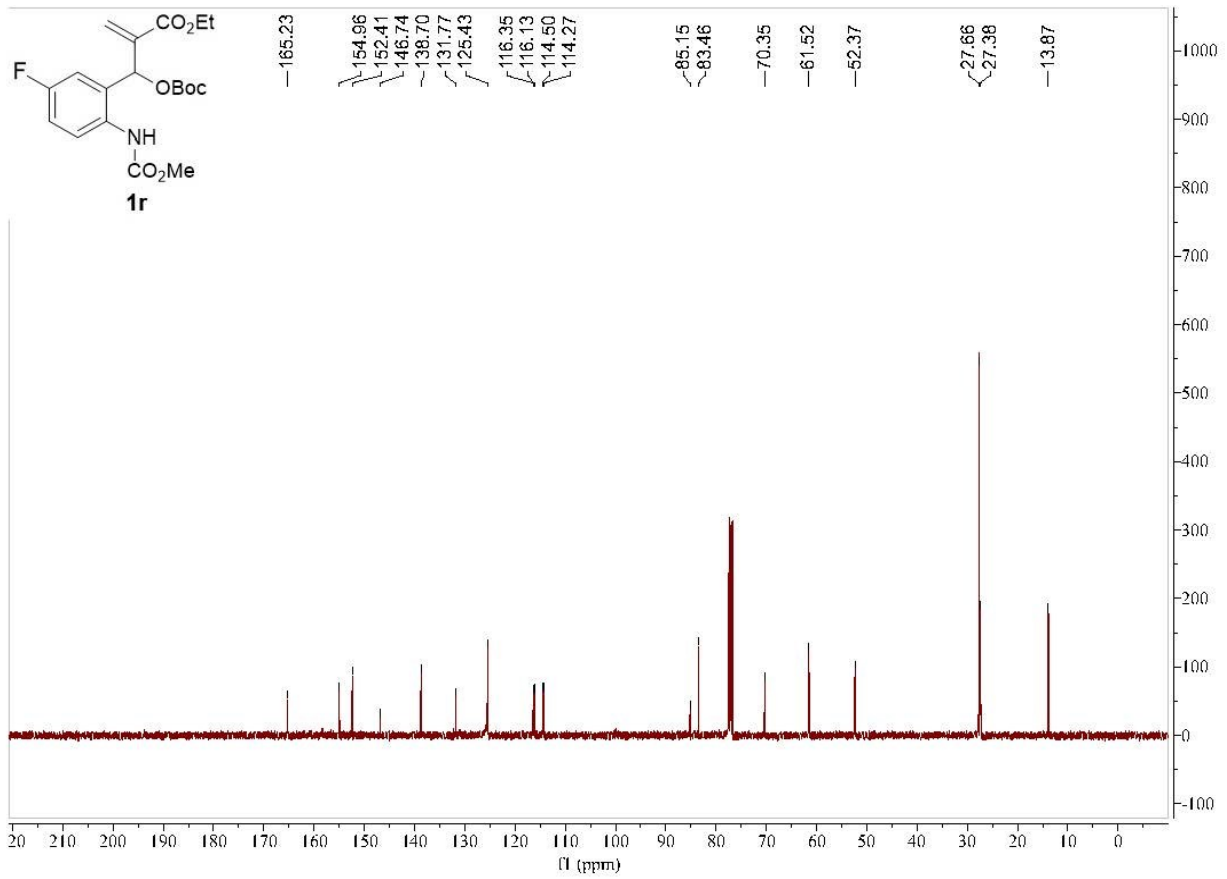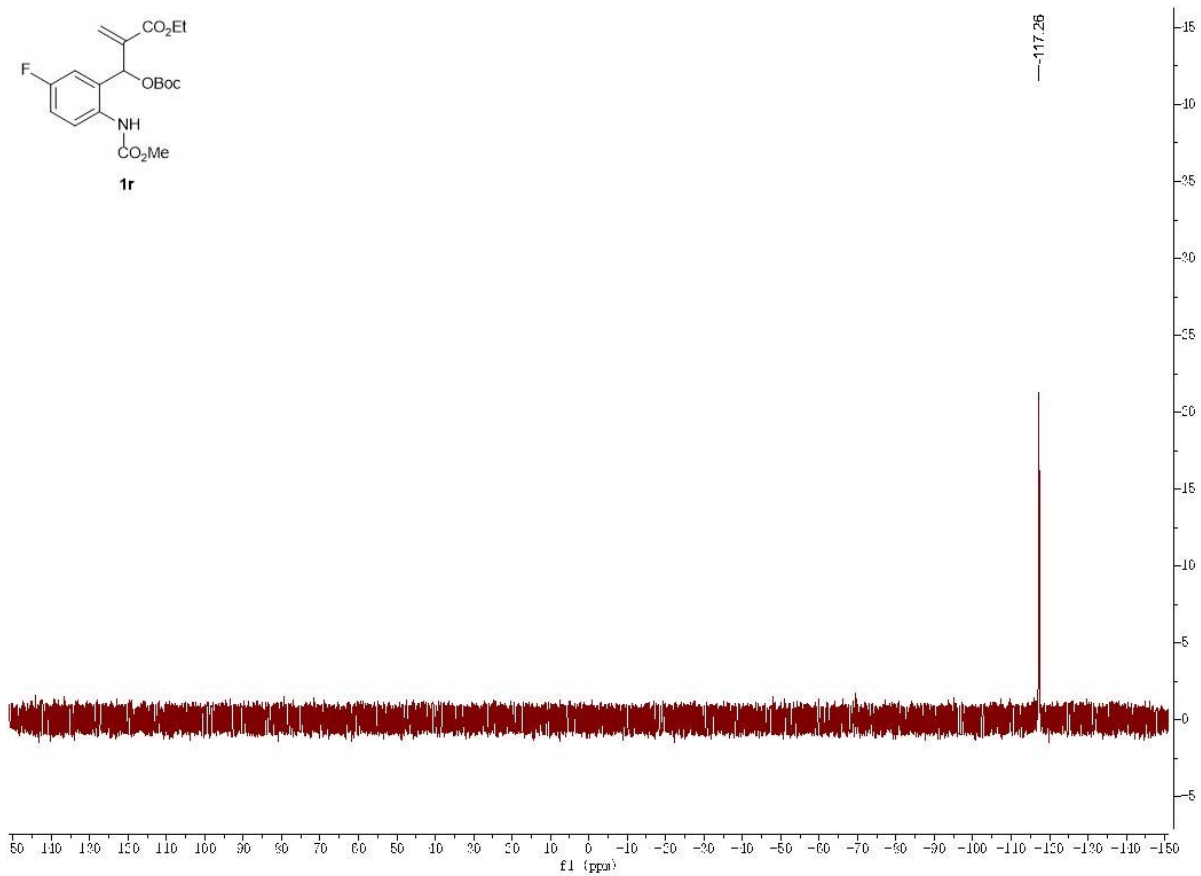

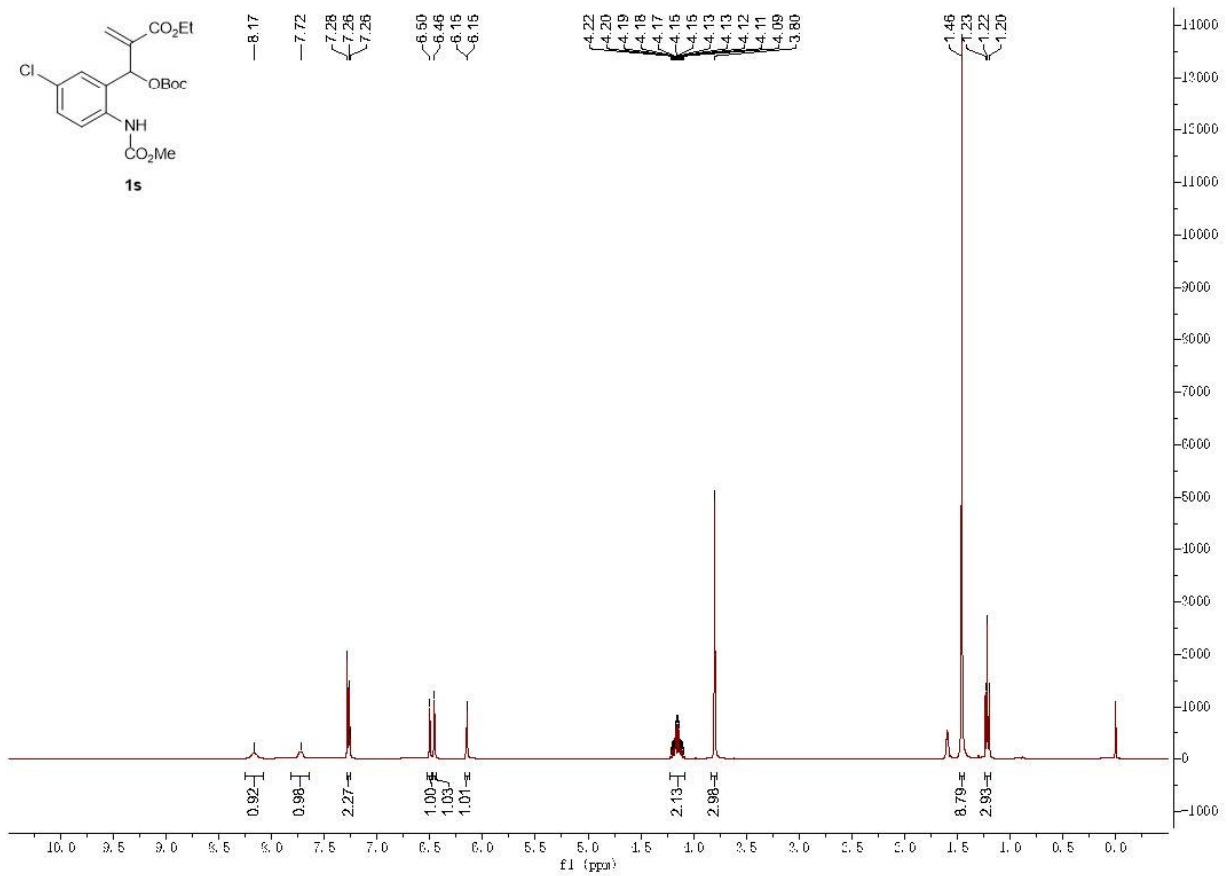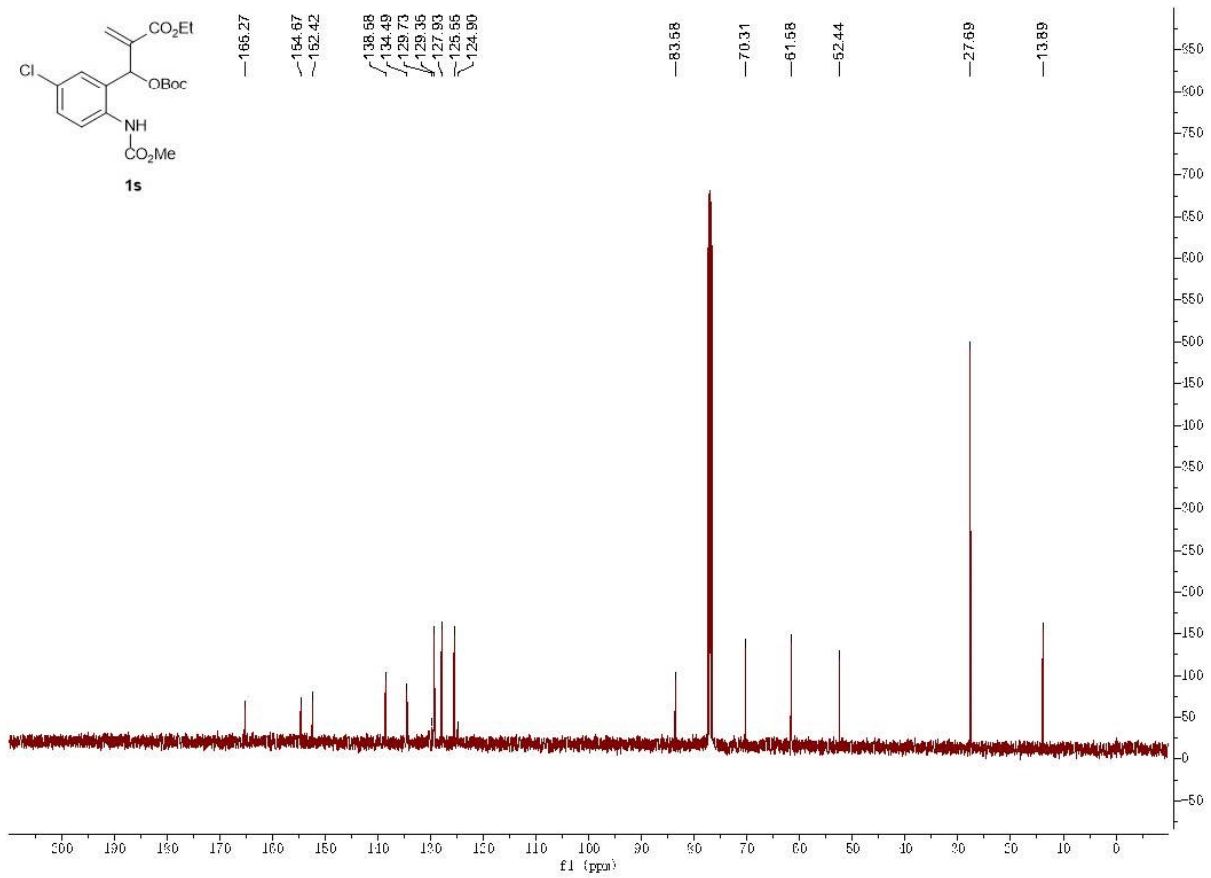

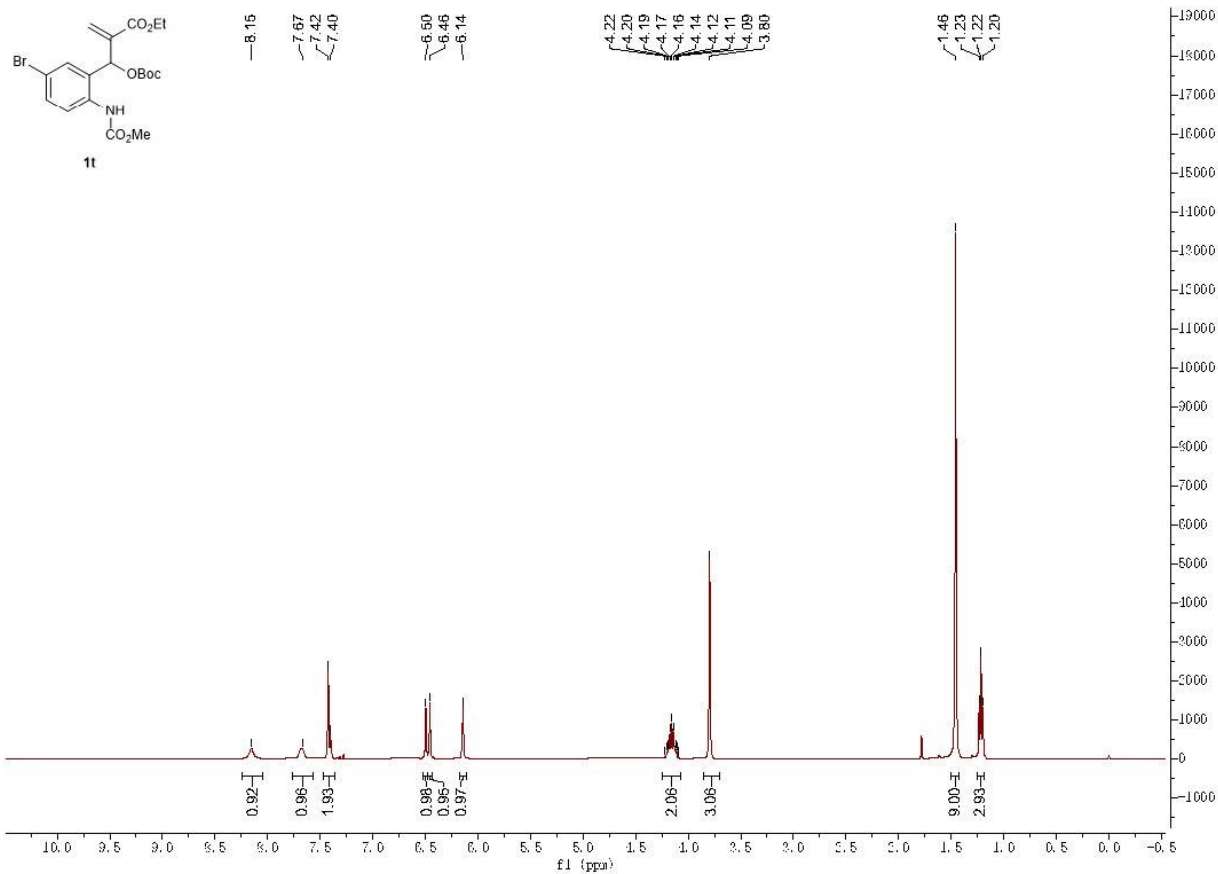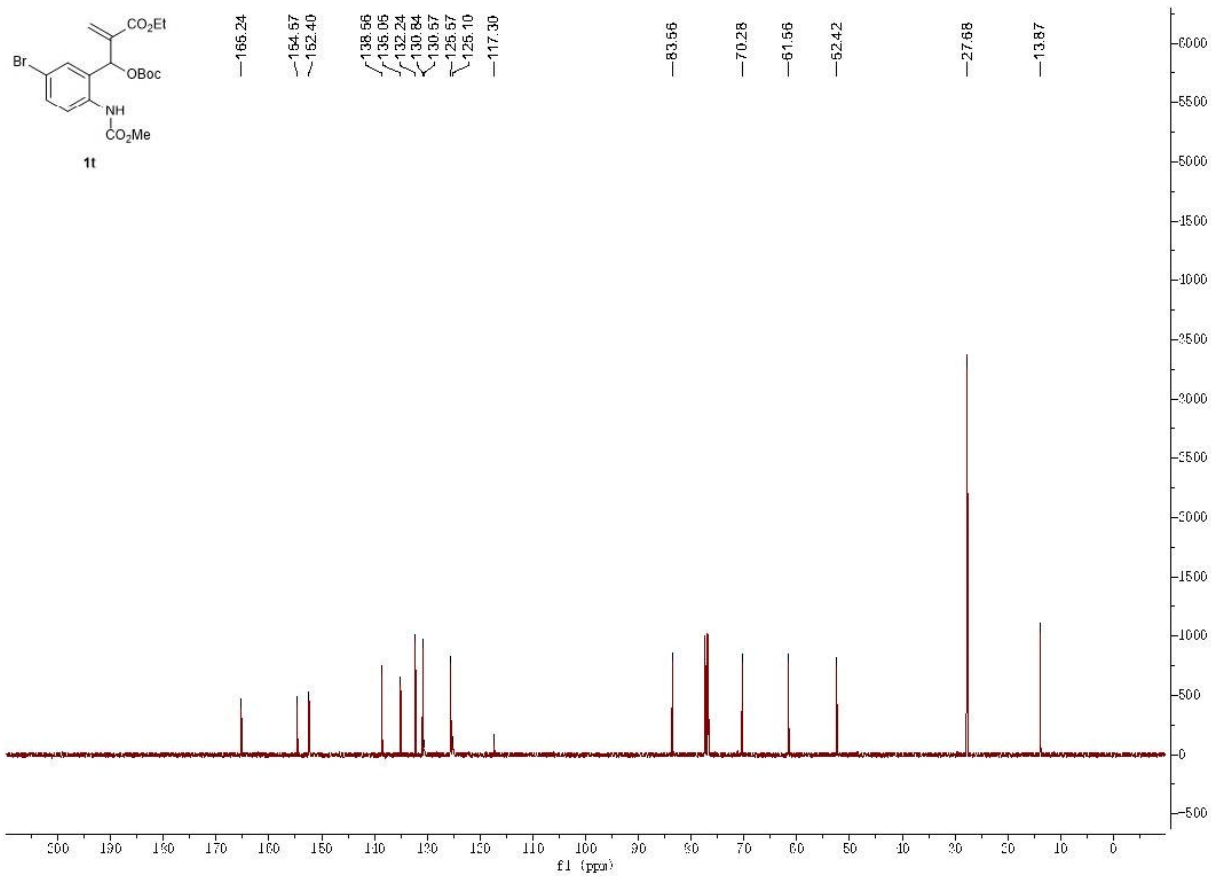

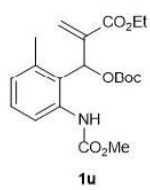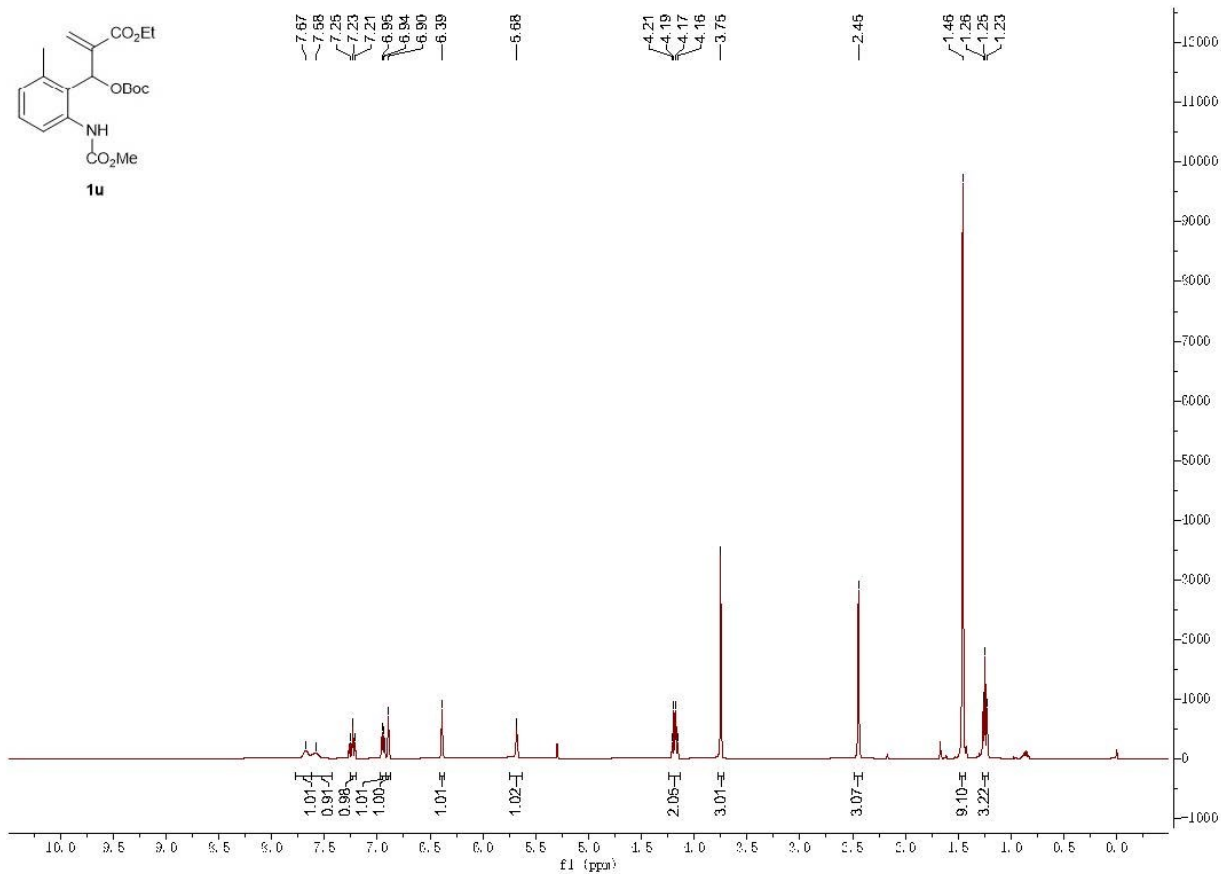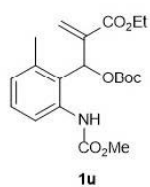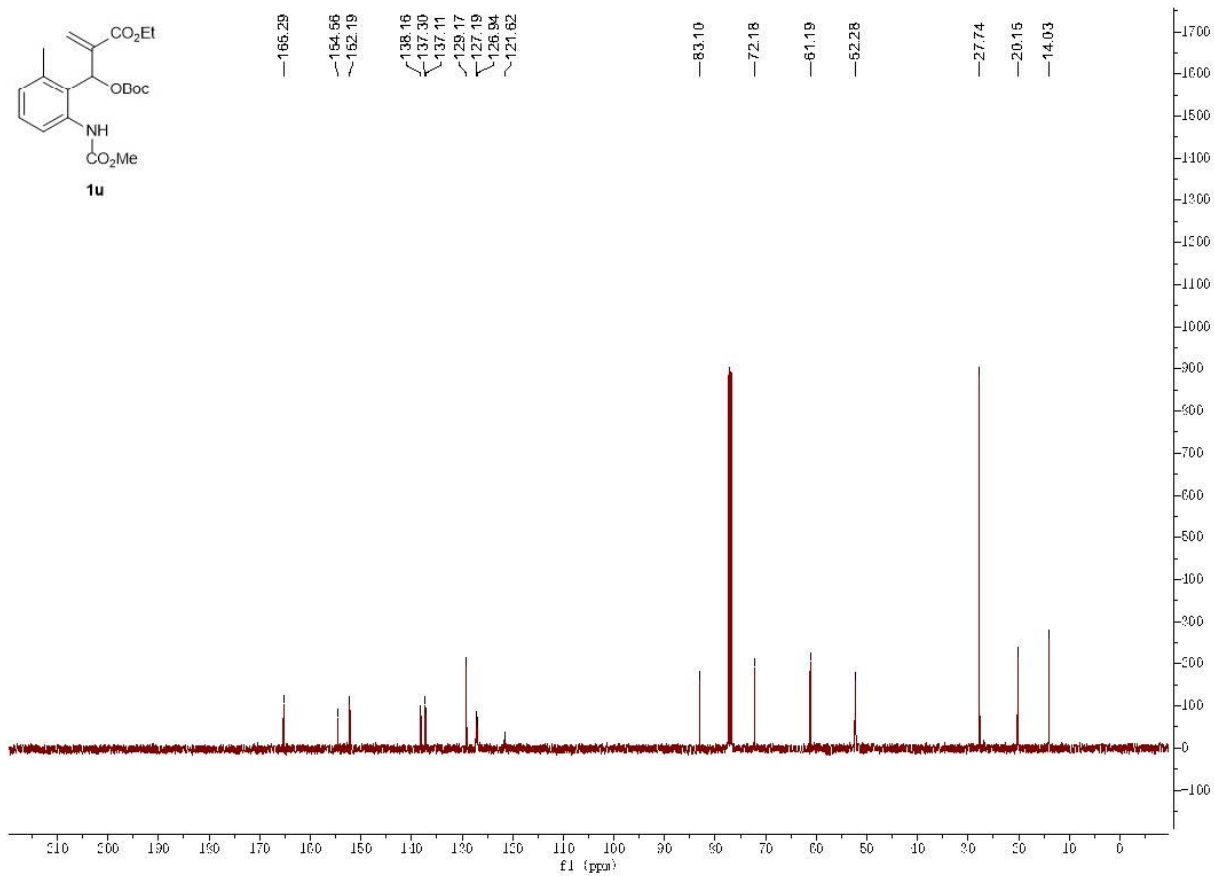



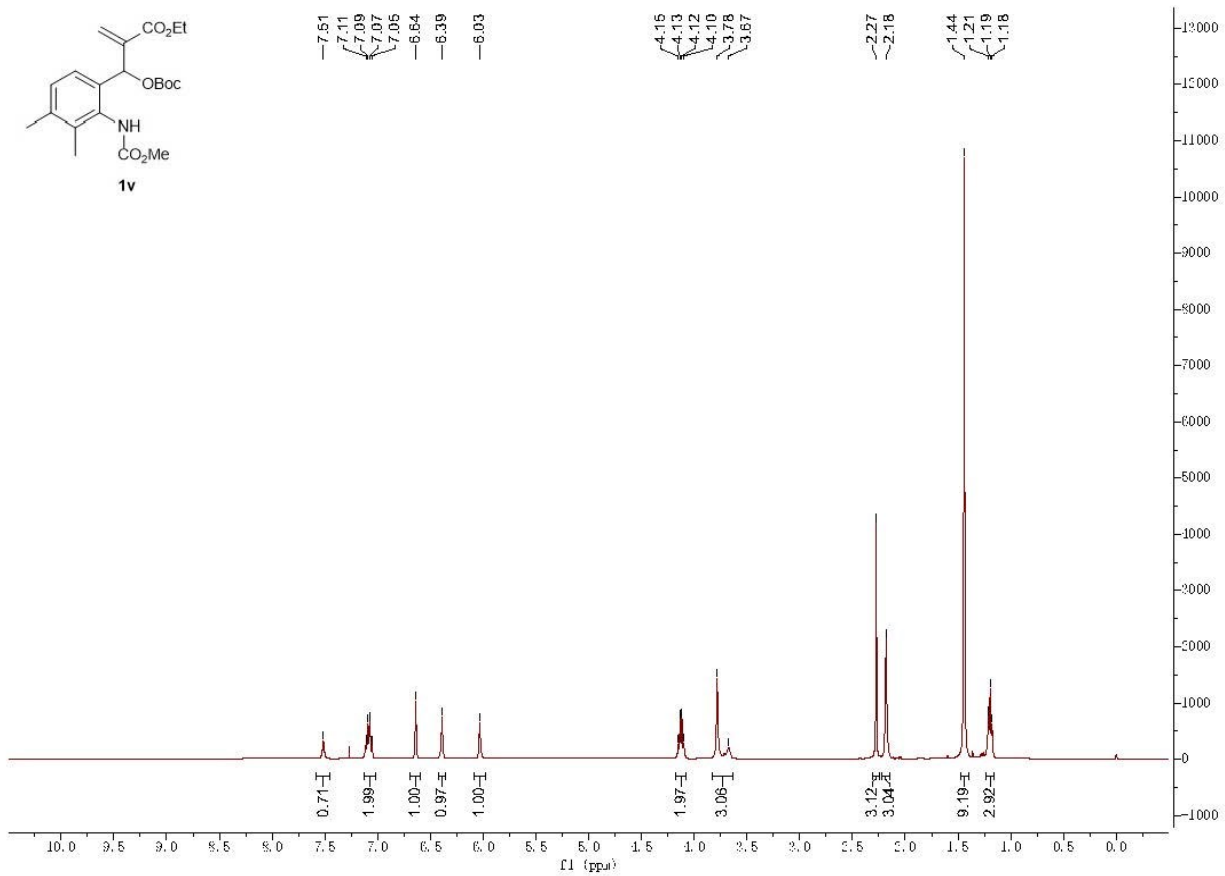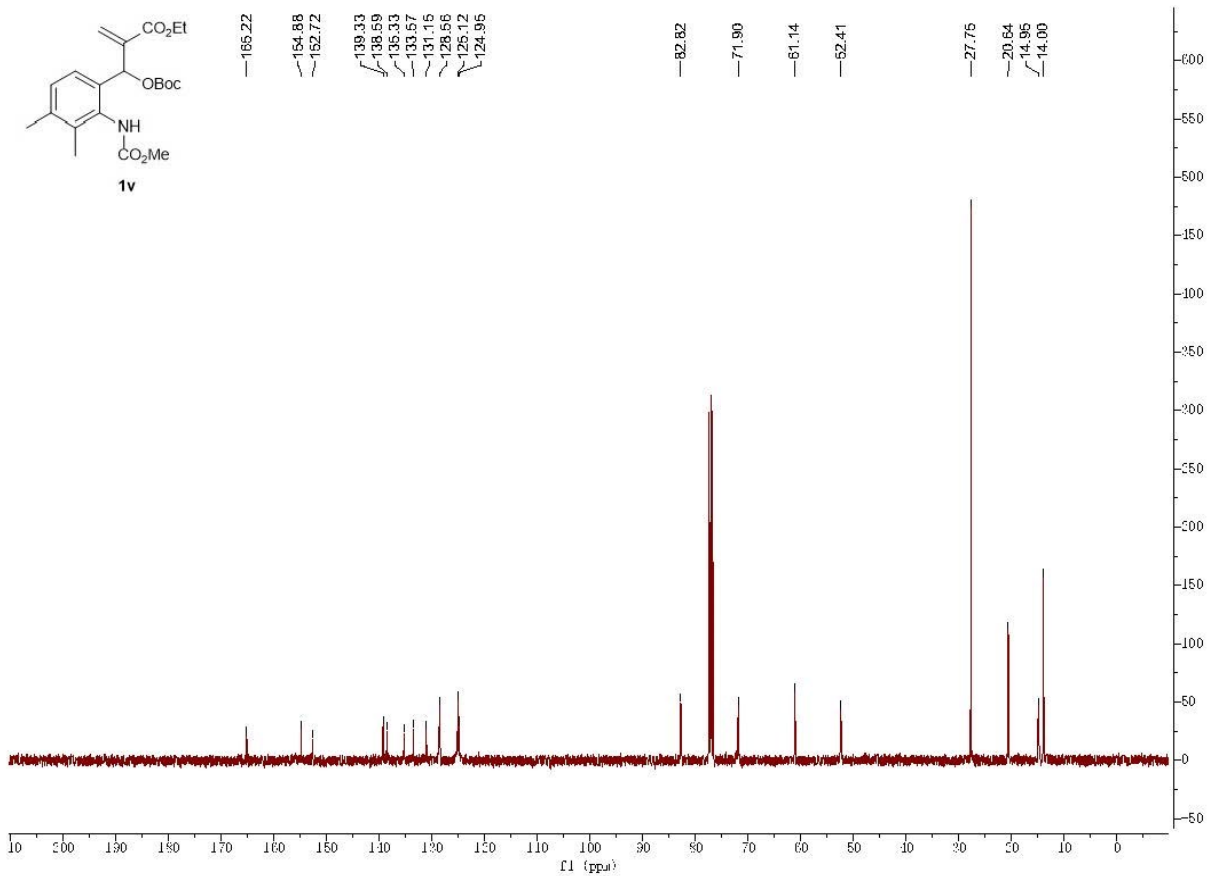

## 8.2. DABCO catalyzed [4+2] cycloadducts 3

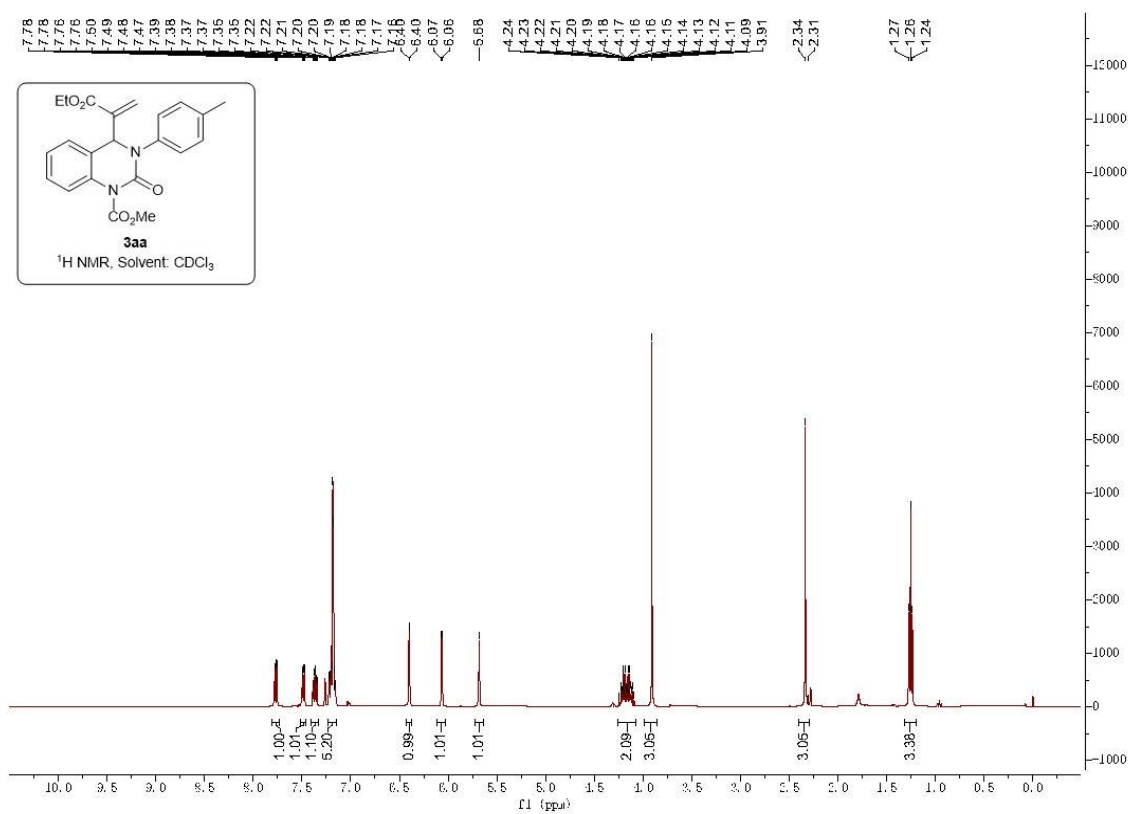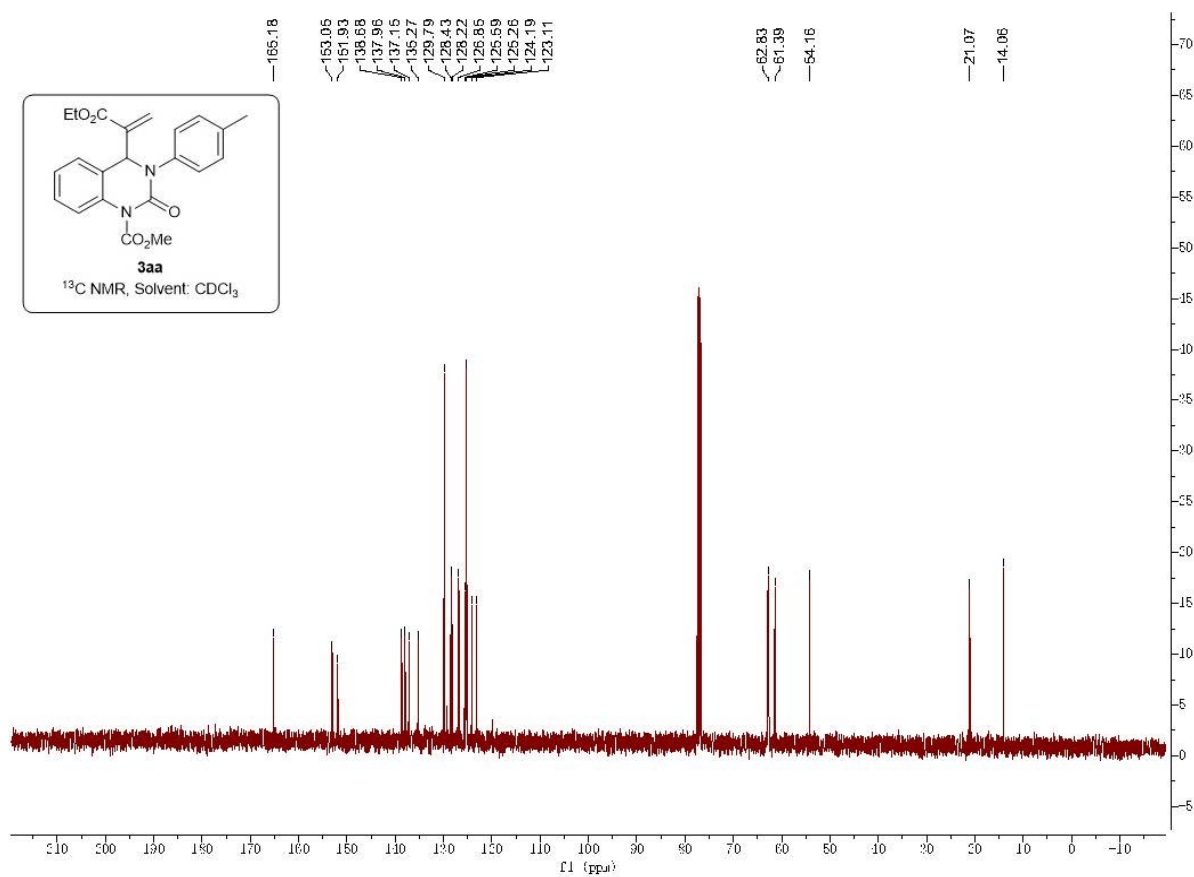

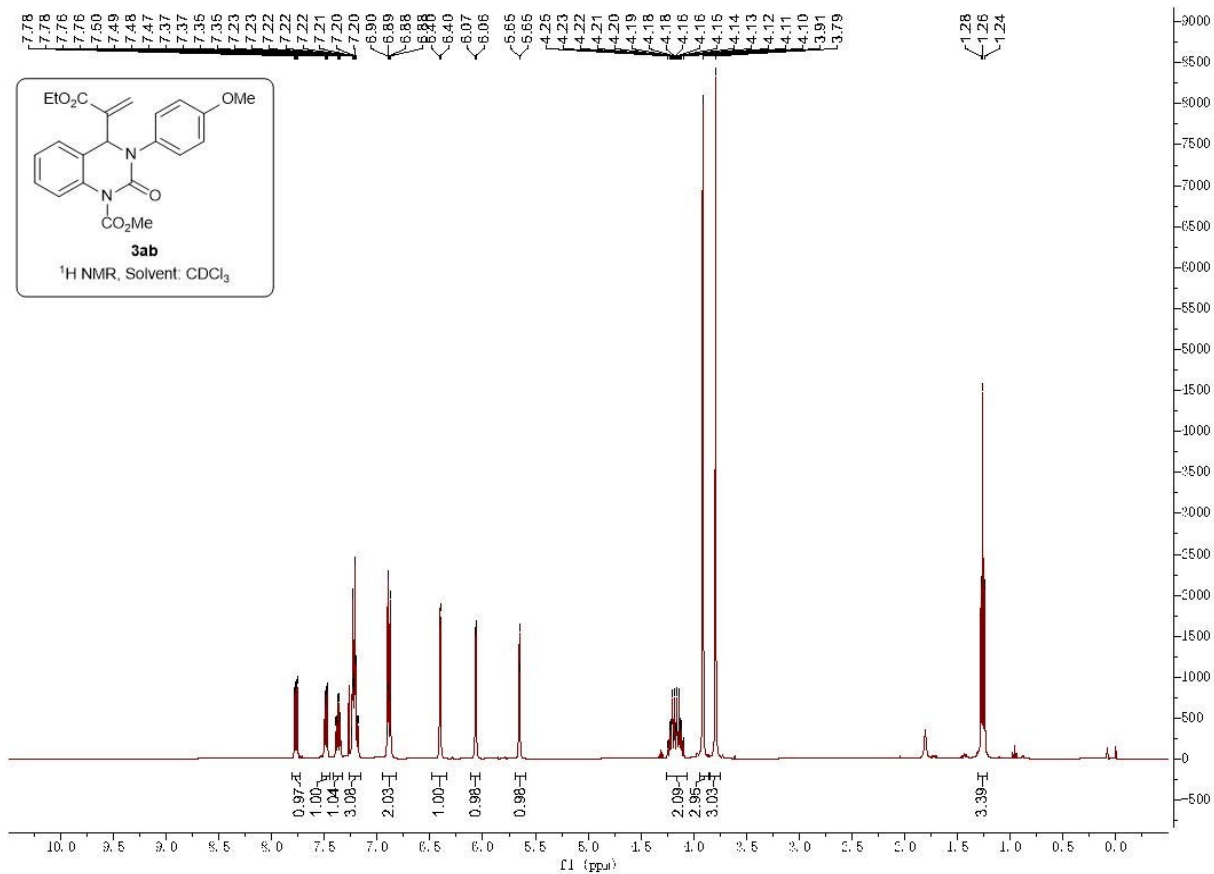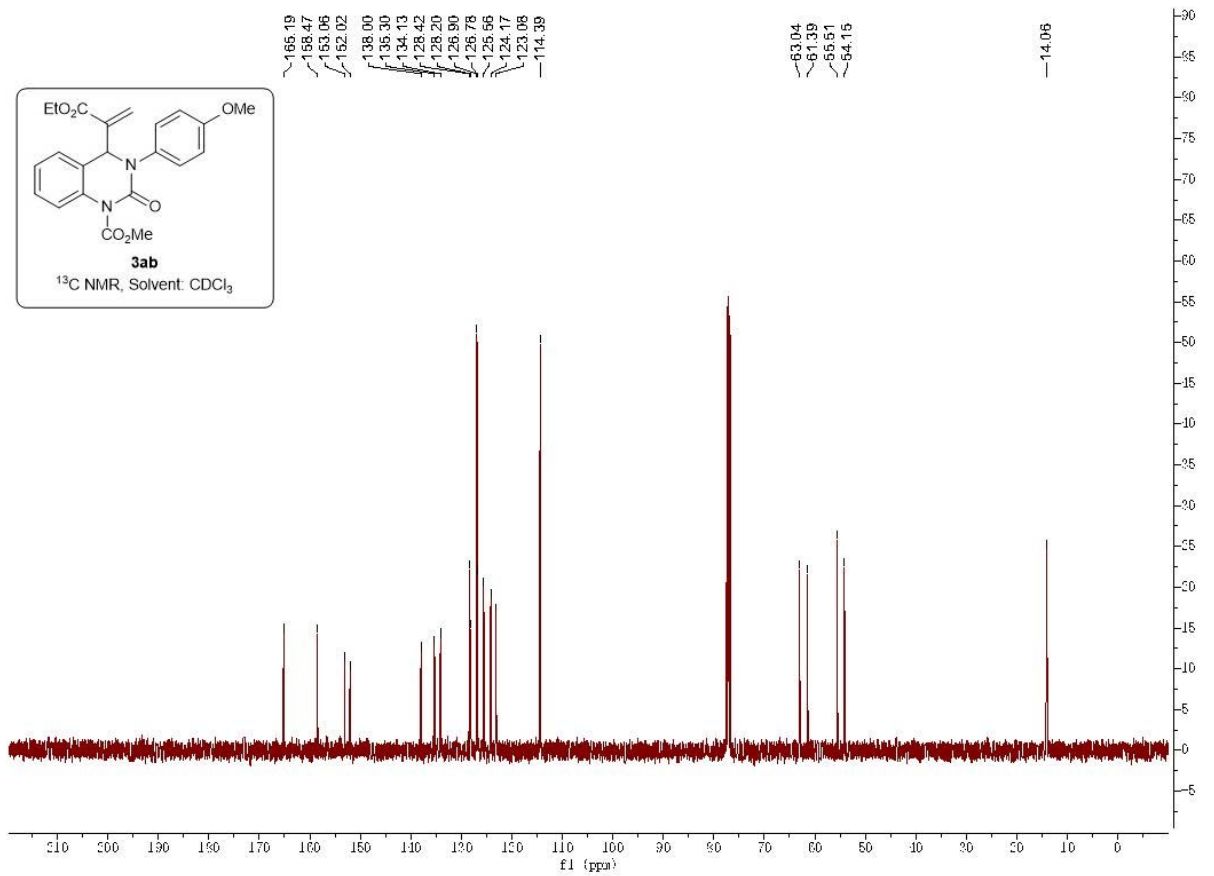

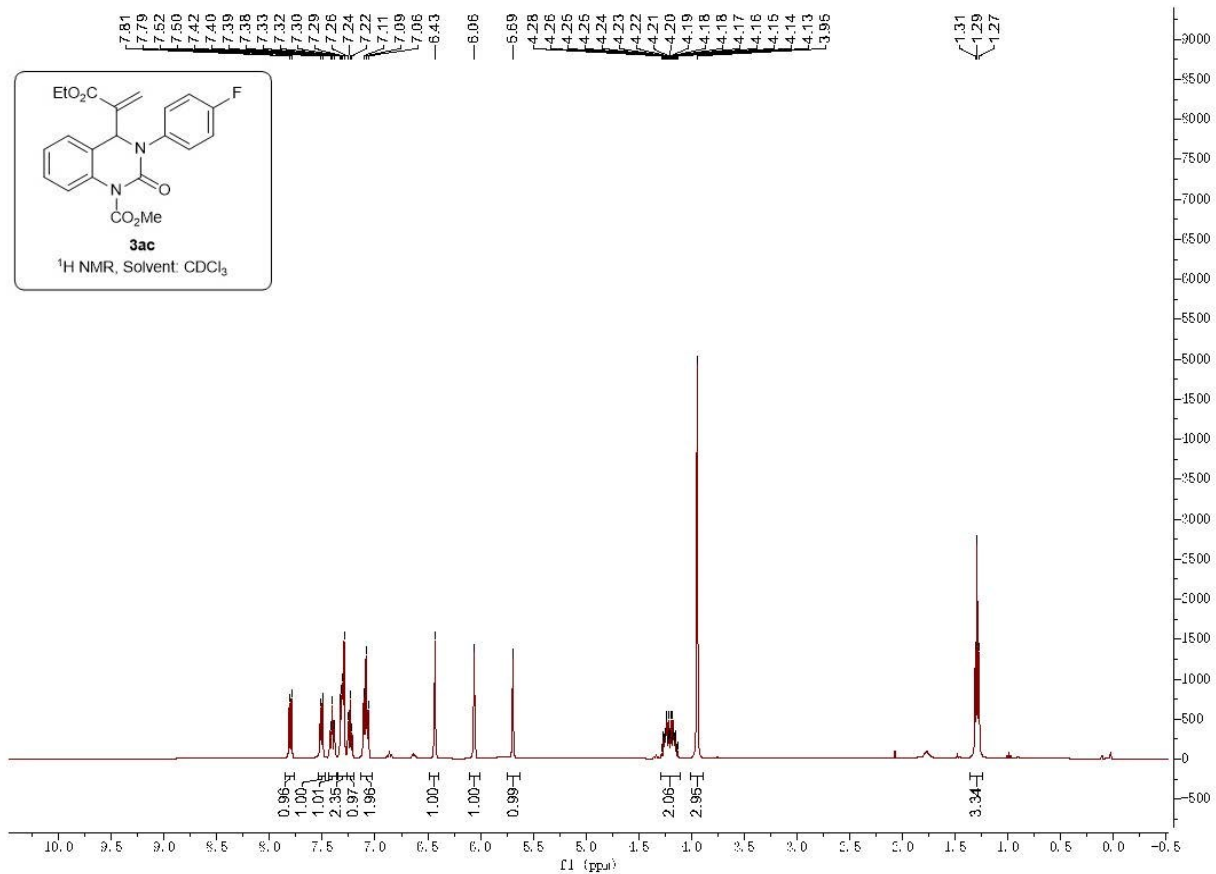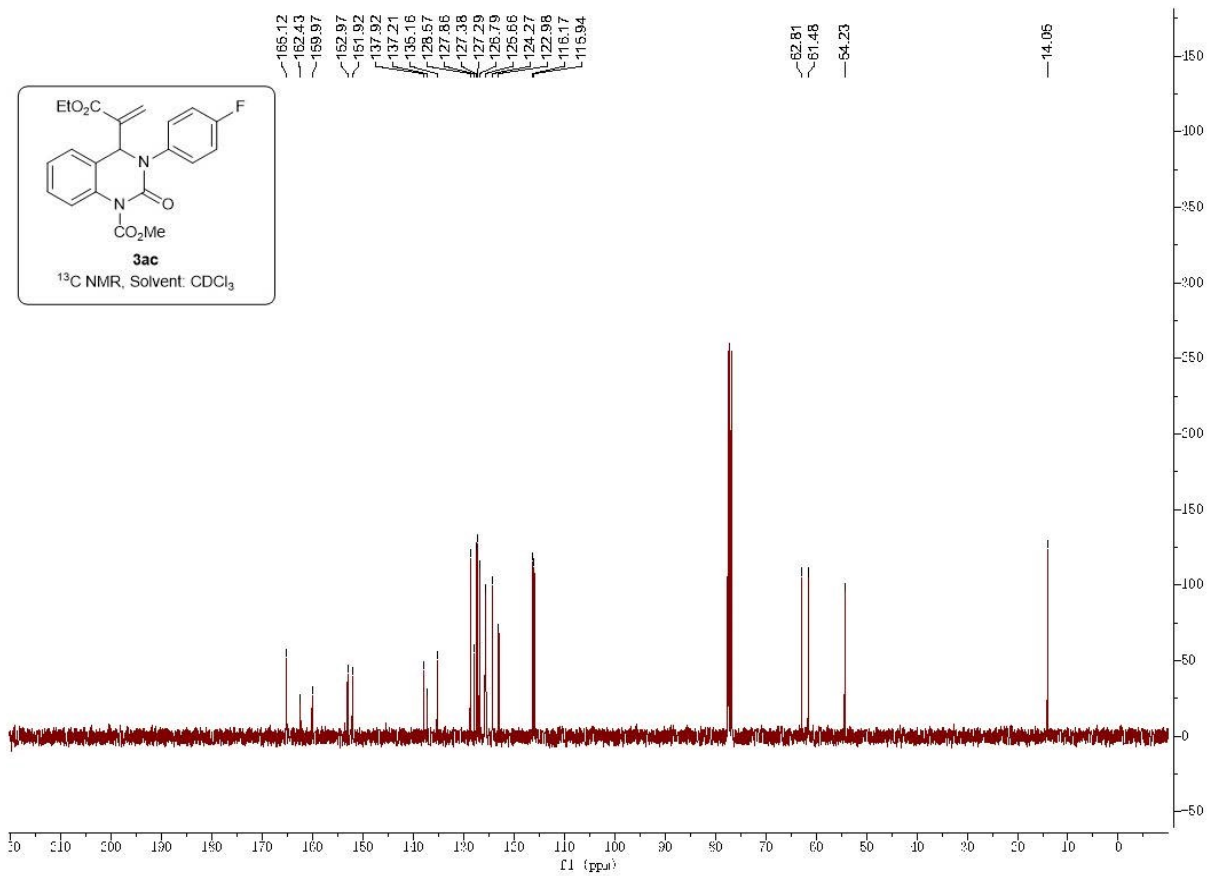

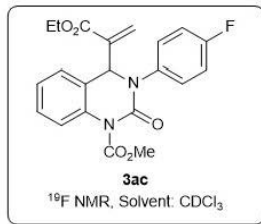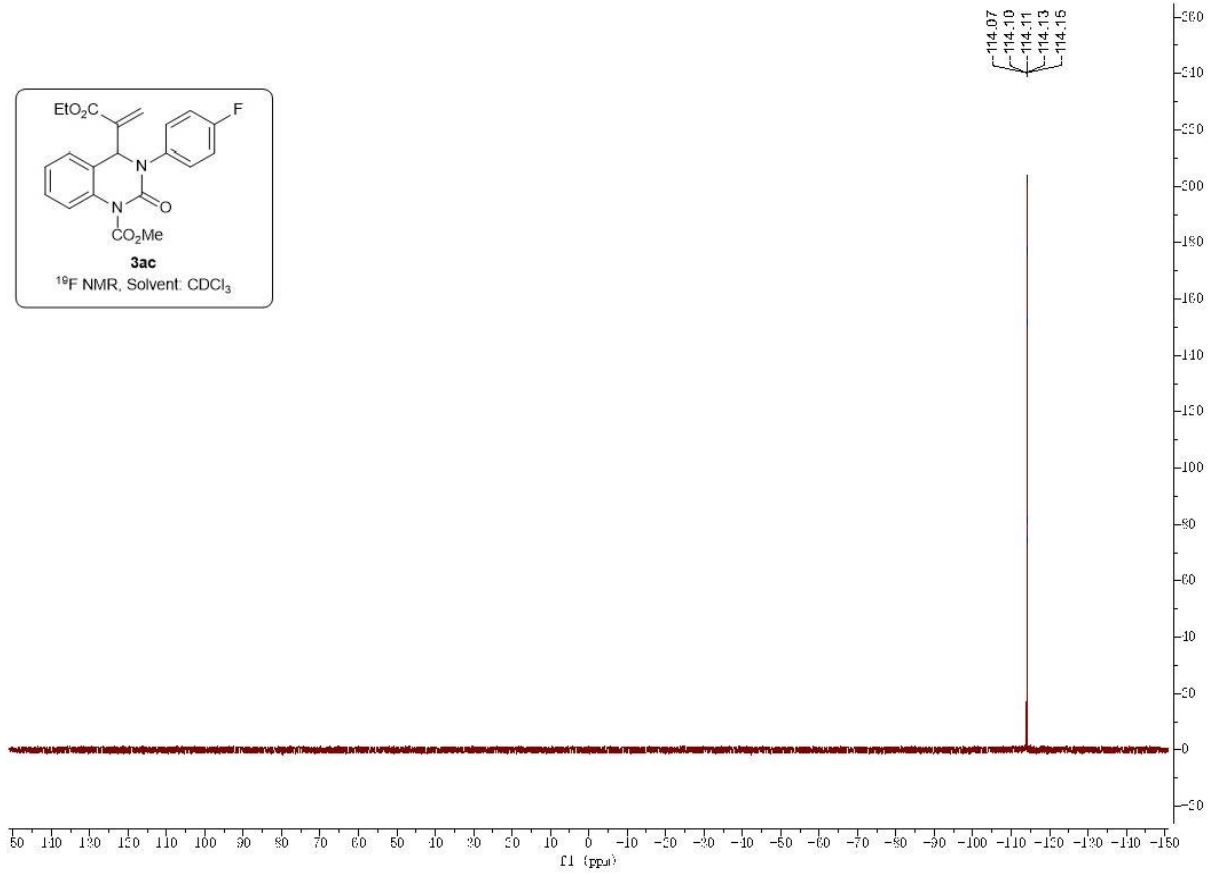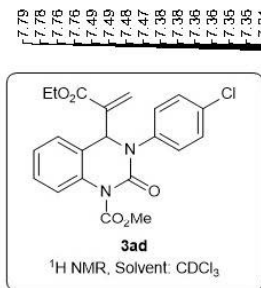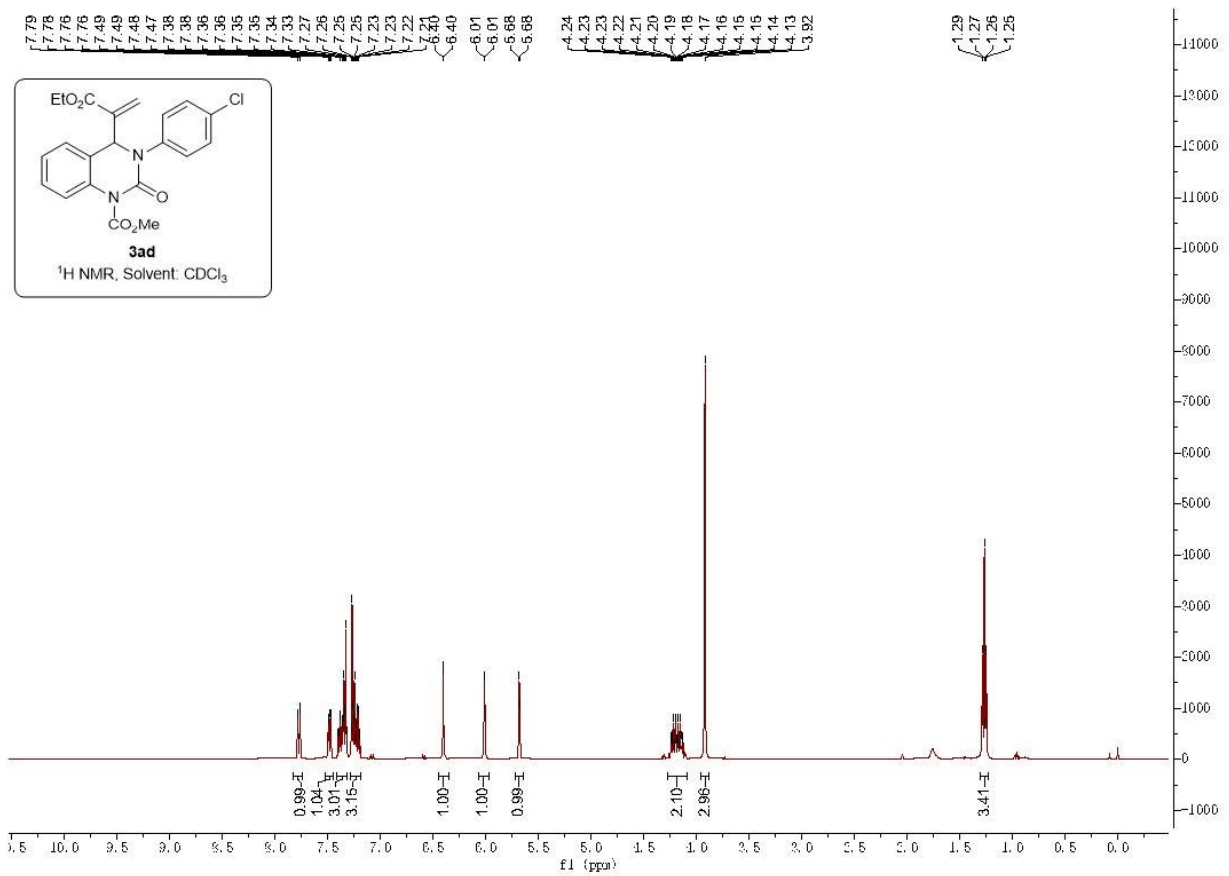

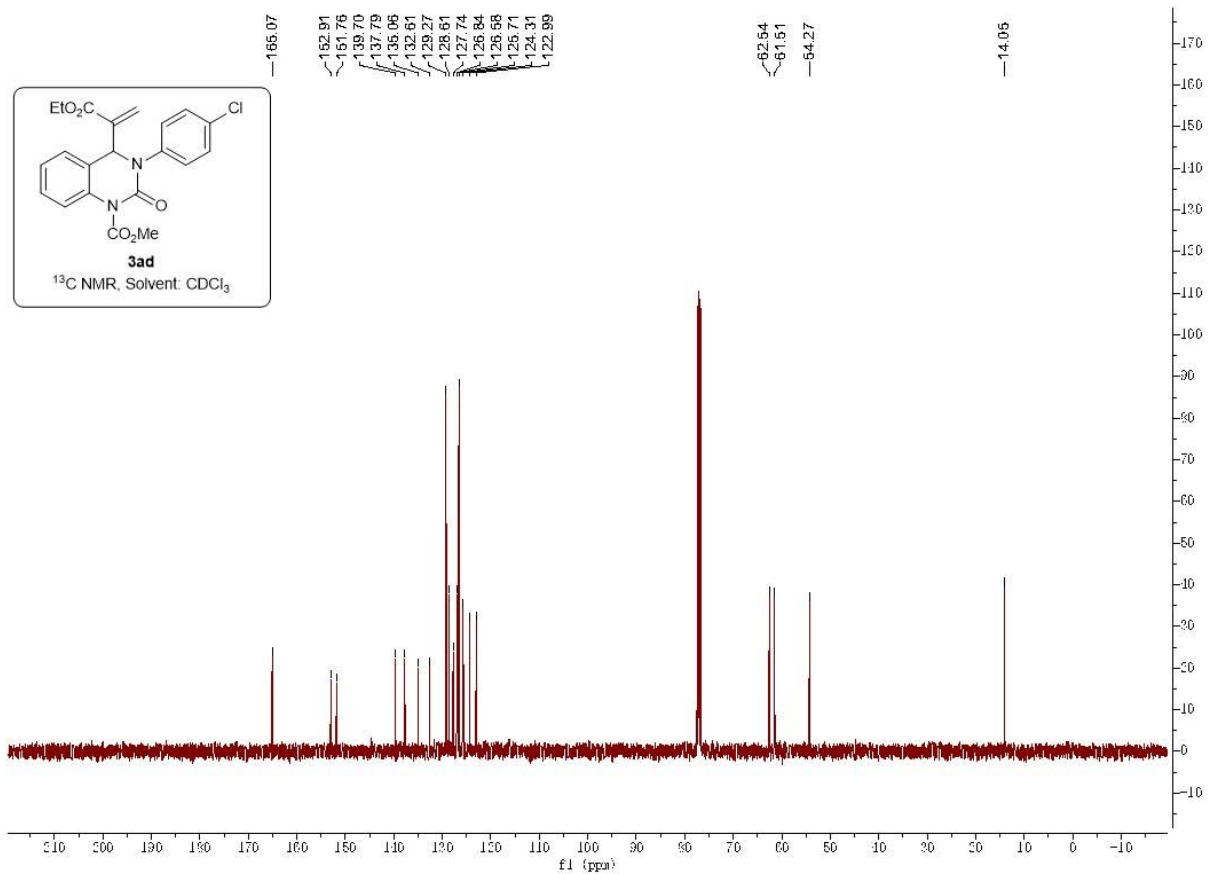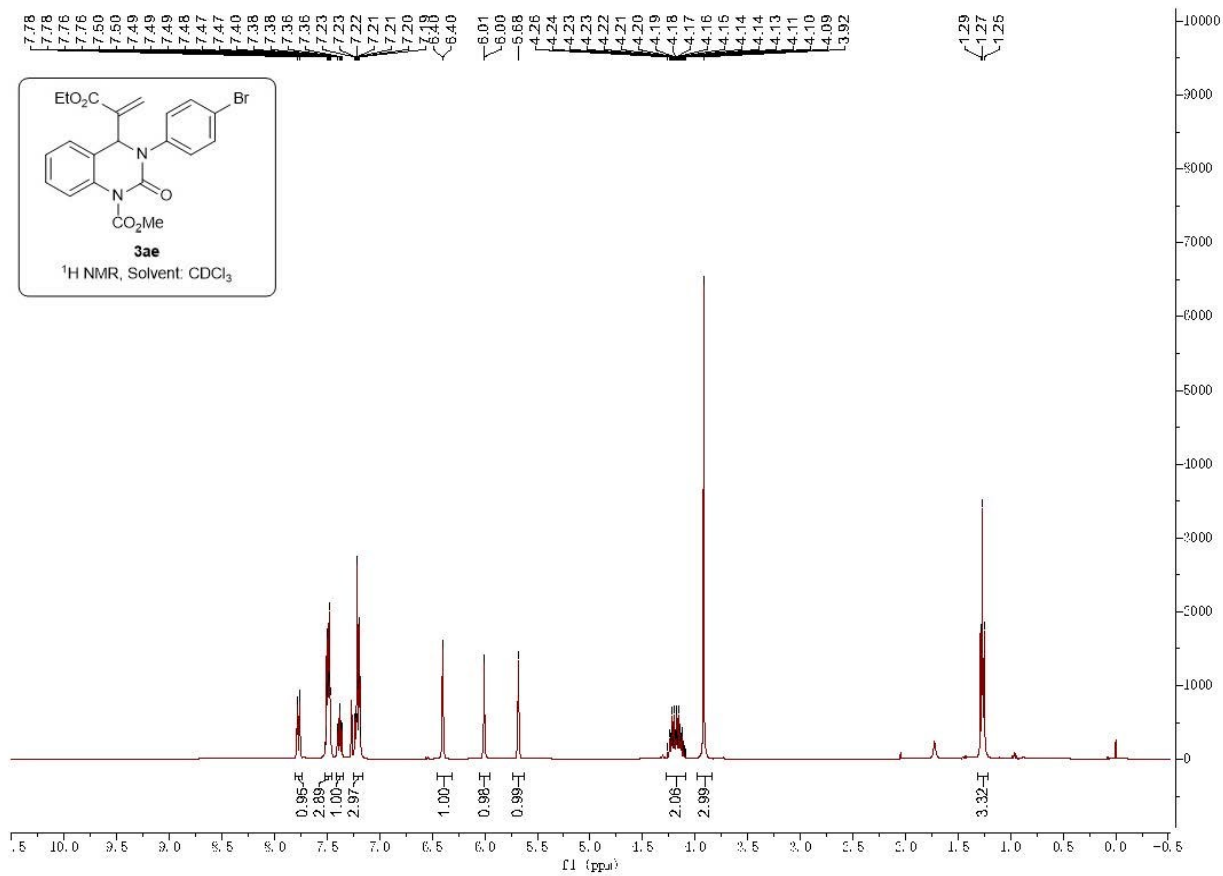

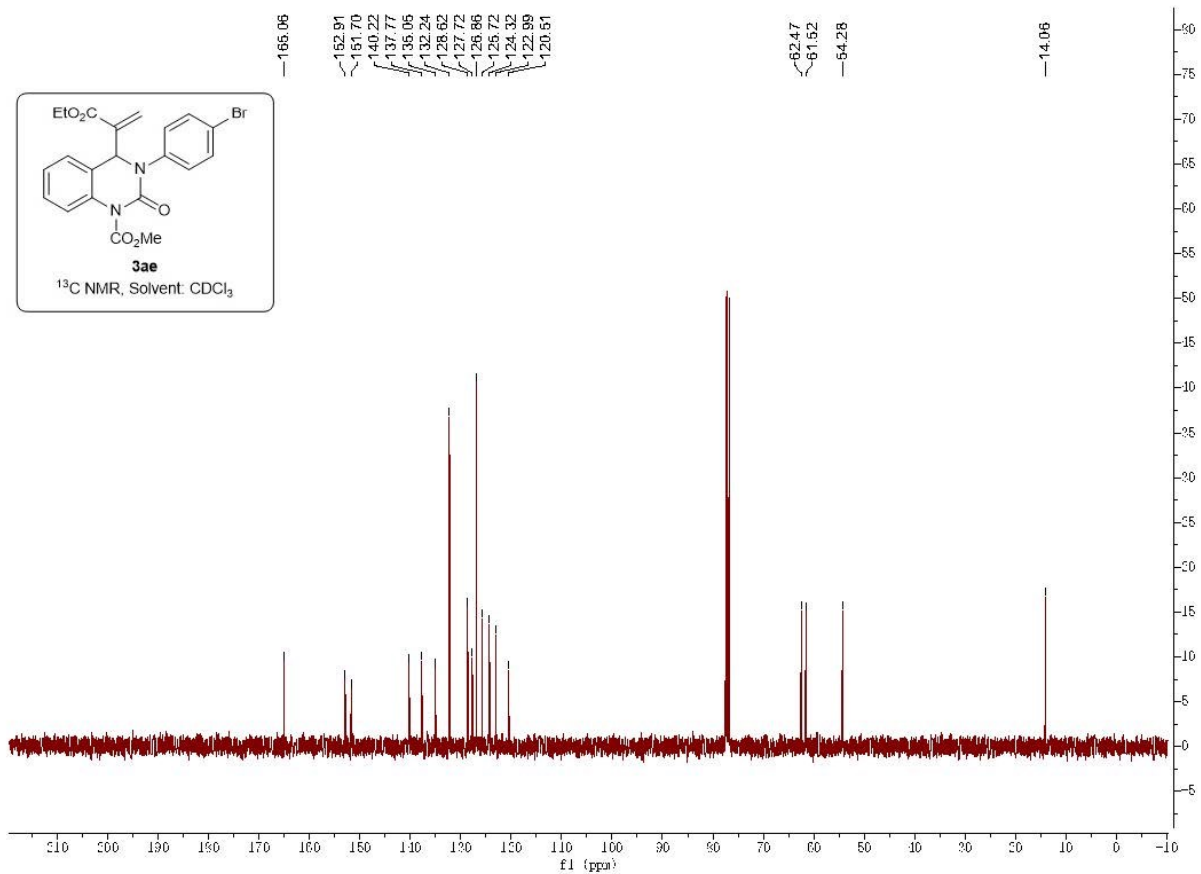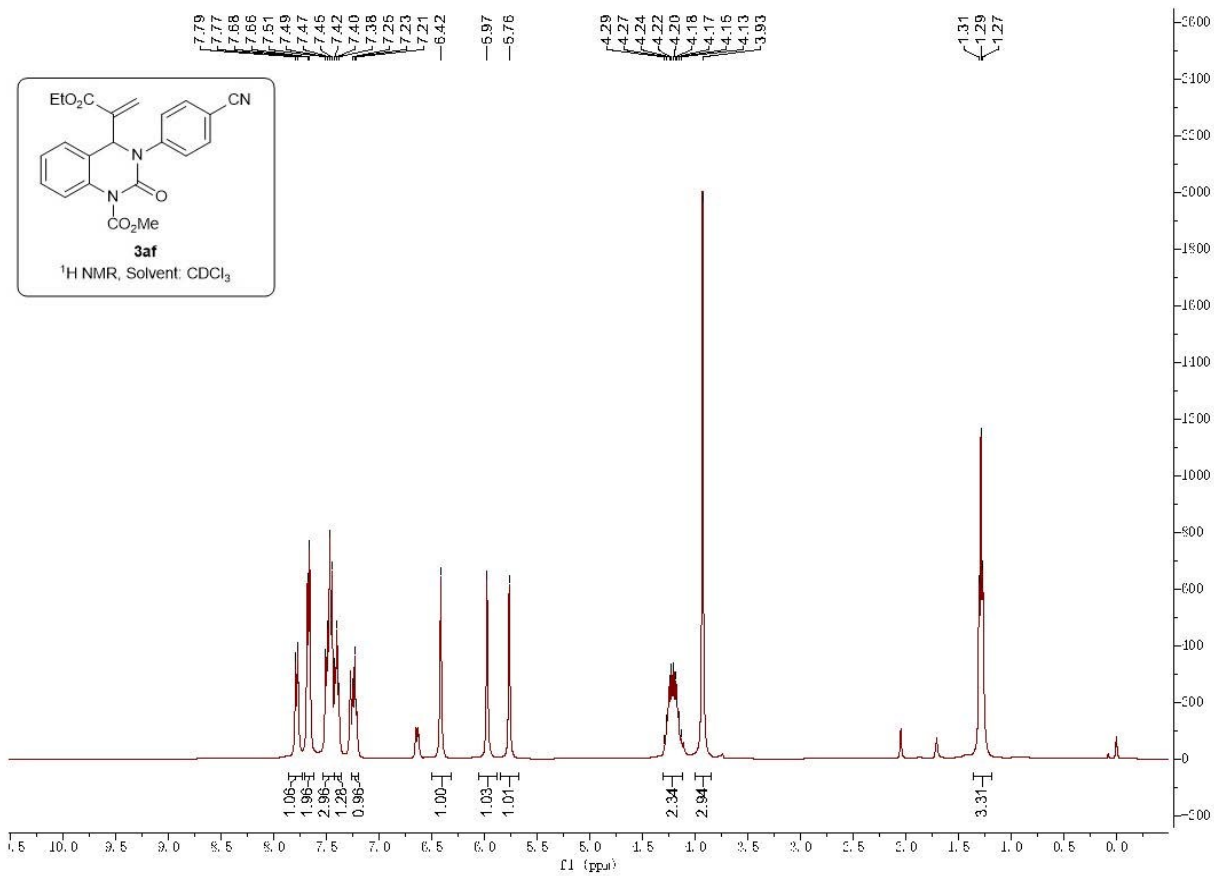

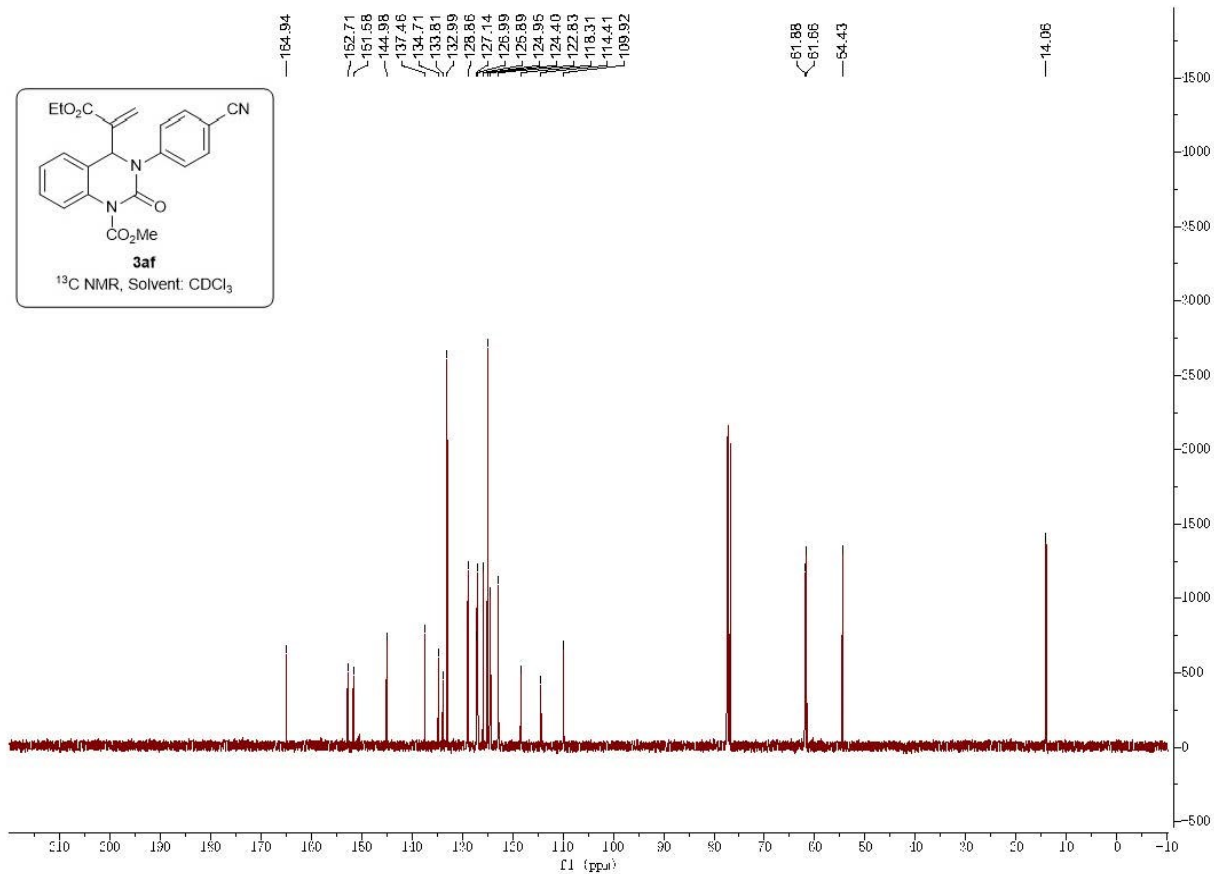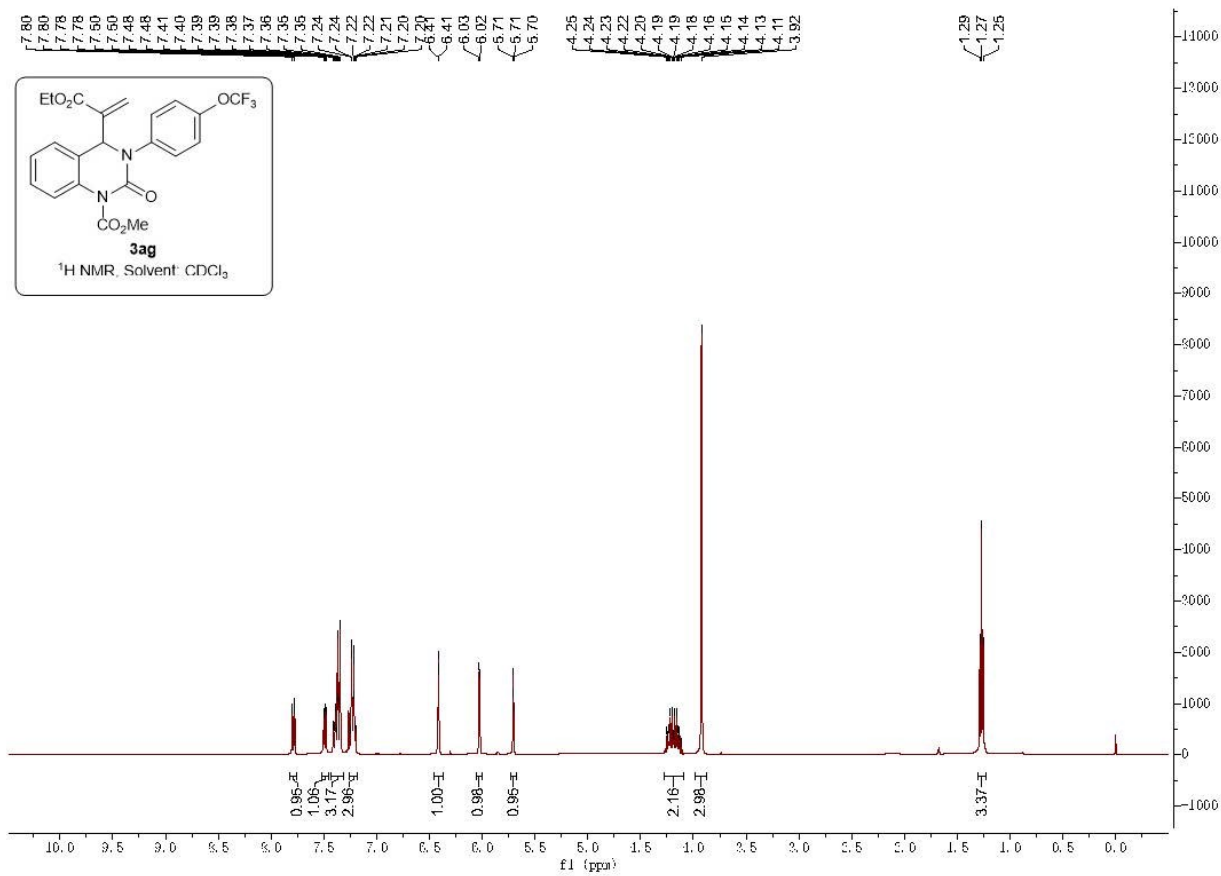



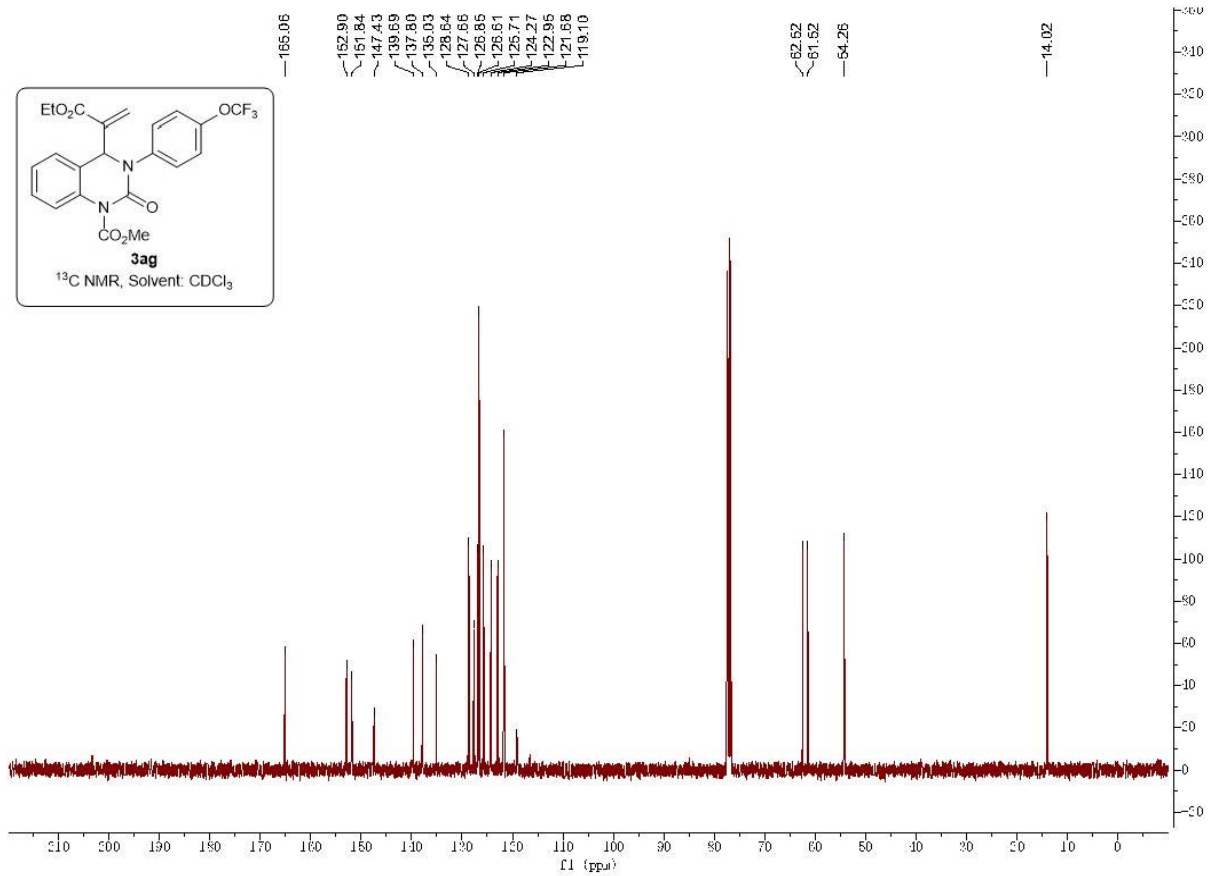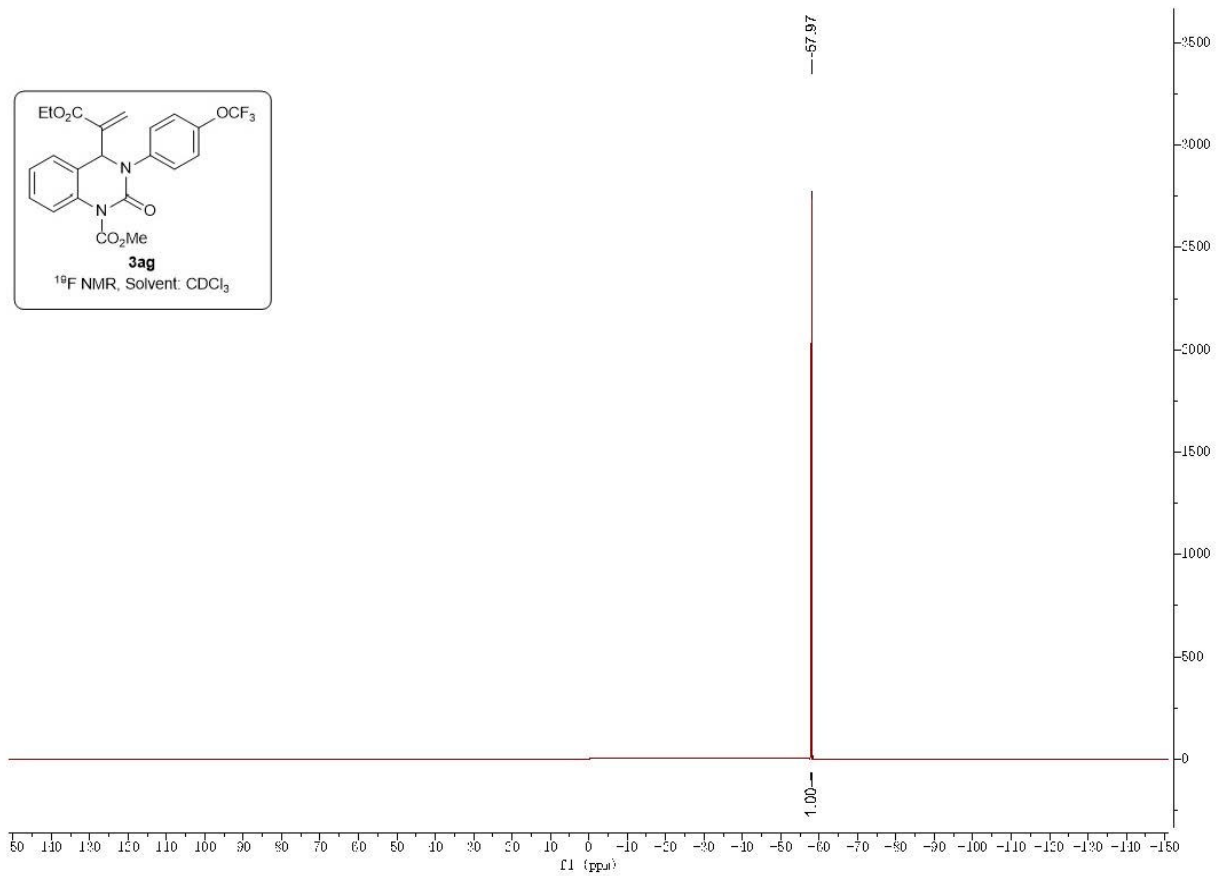

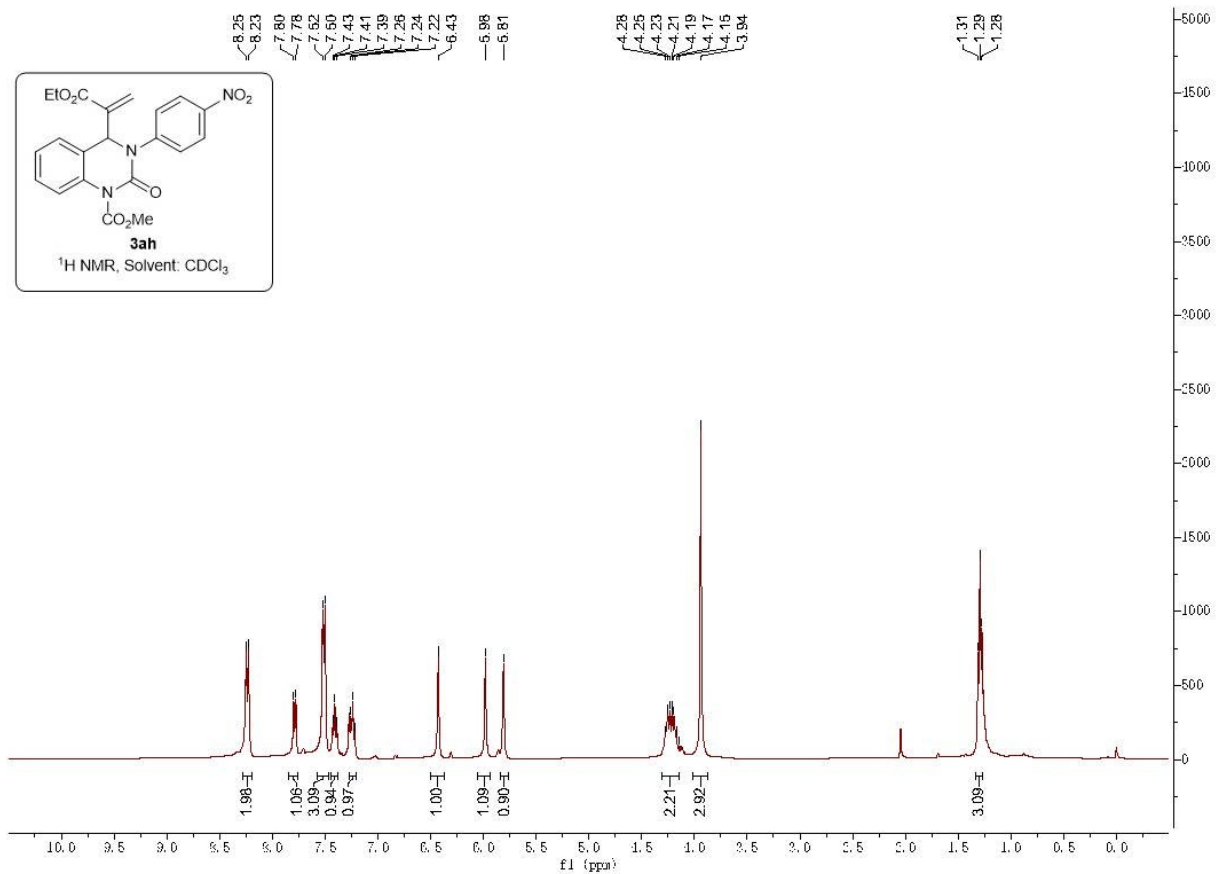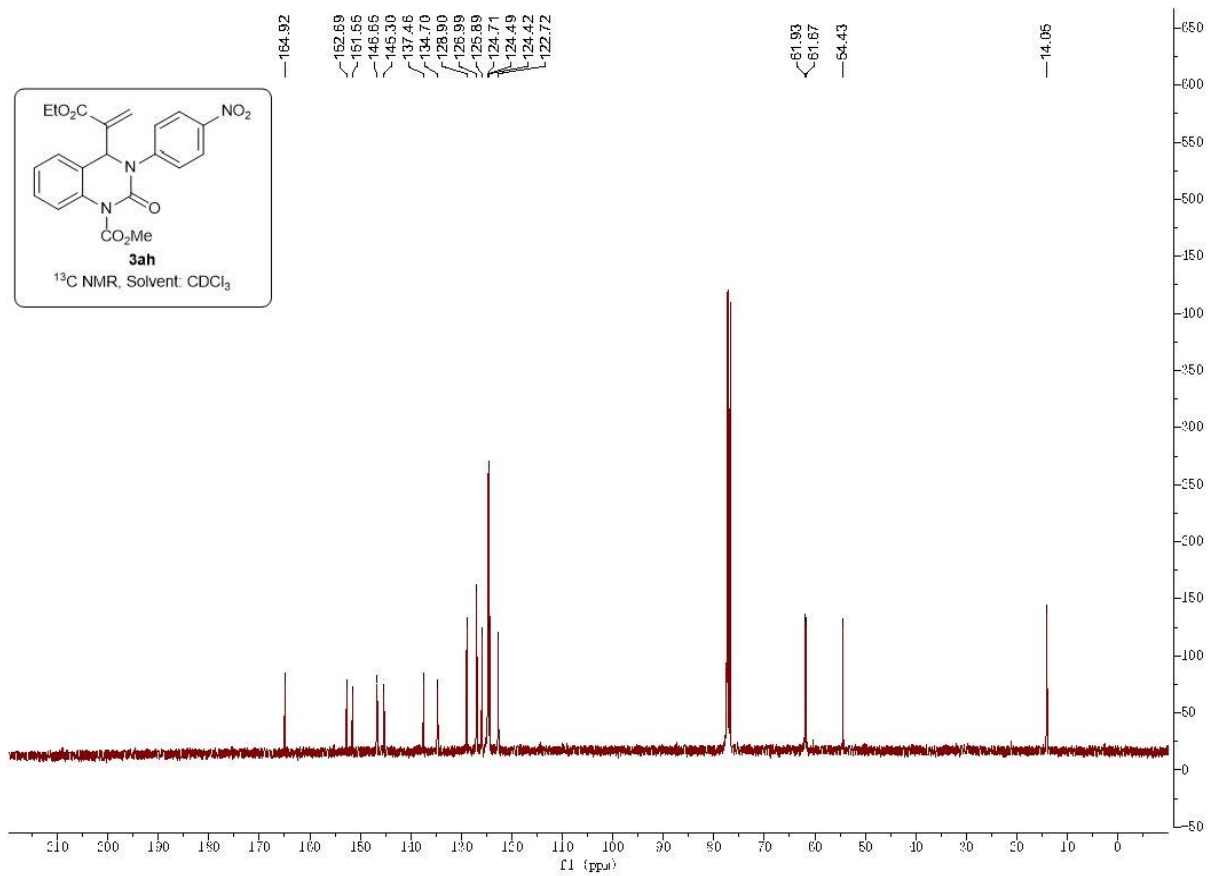

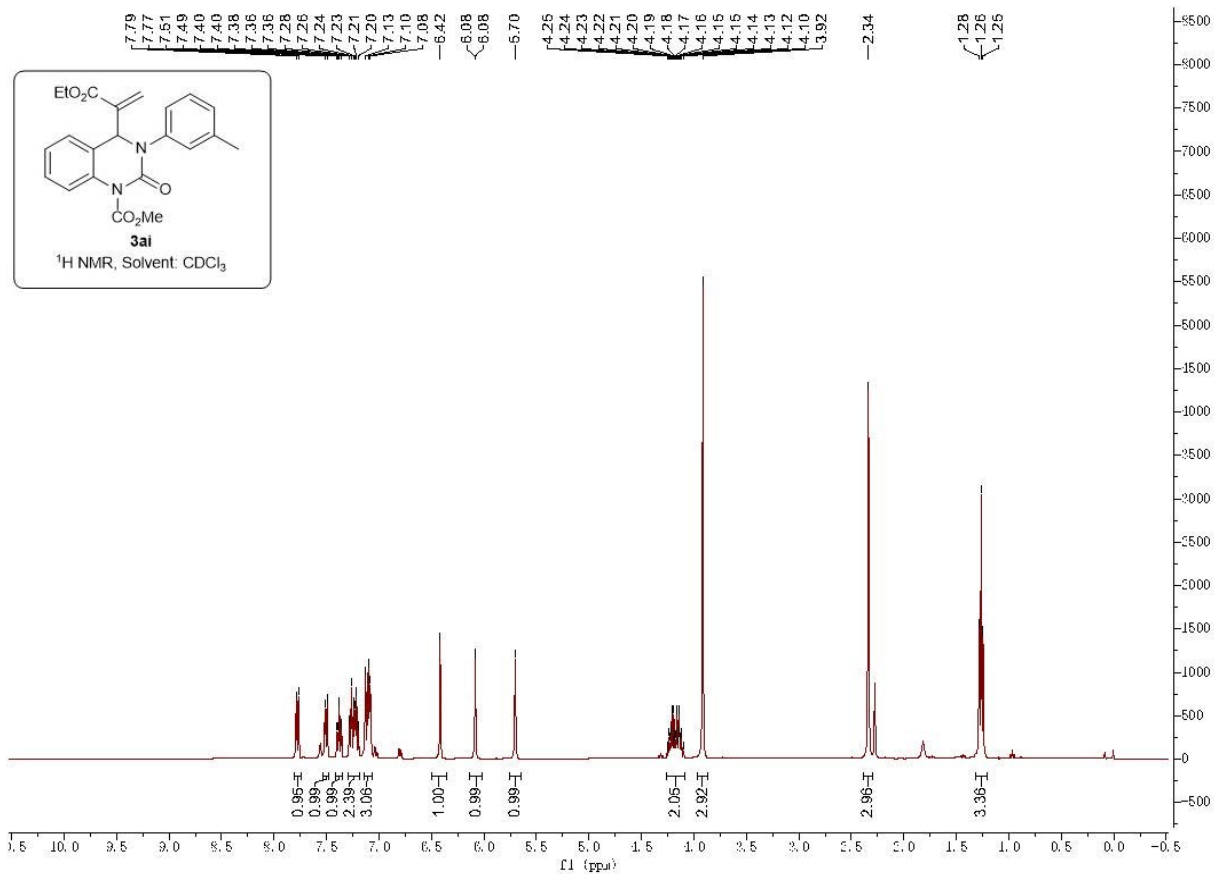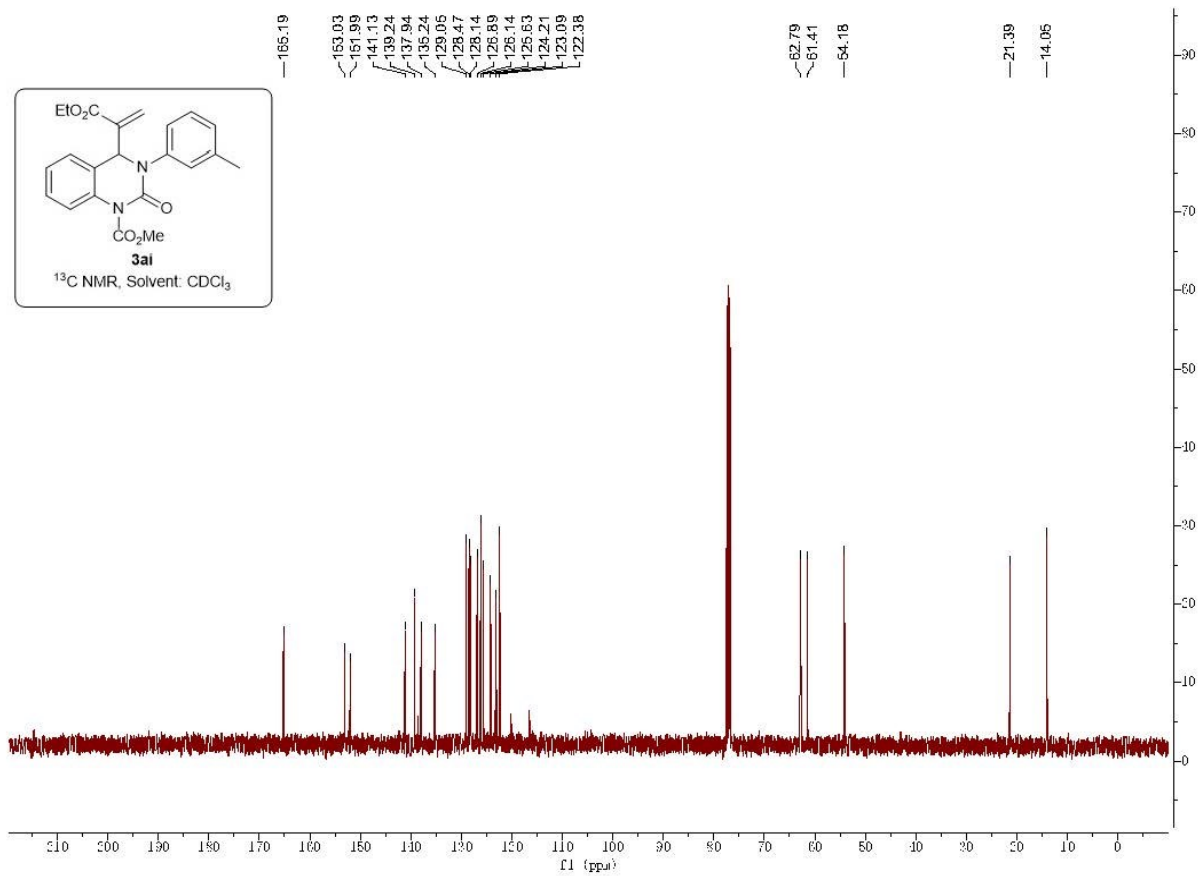

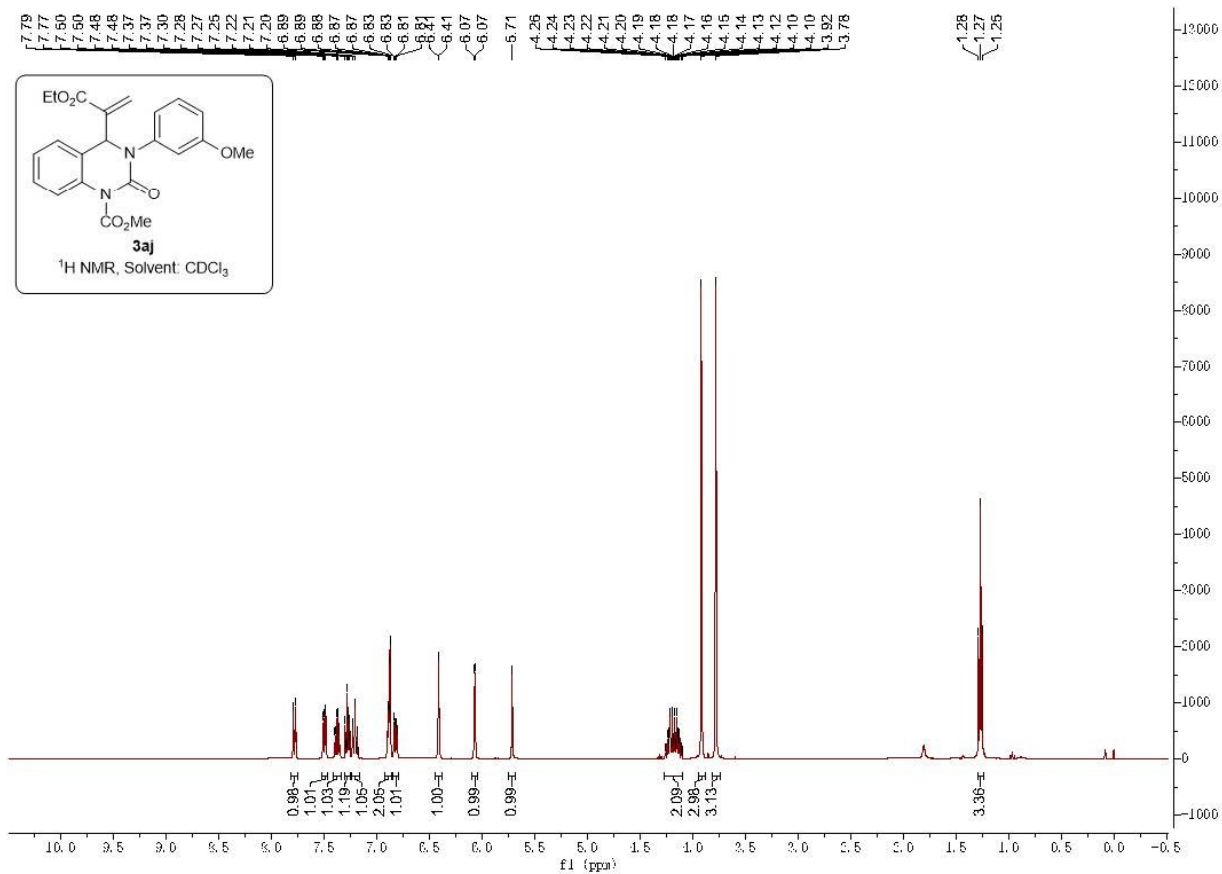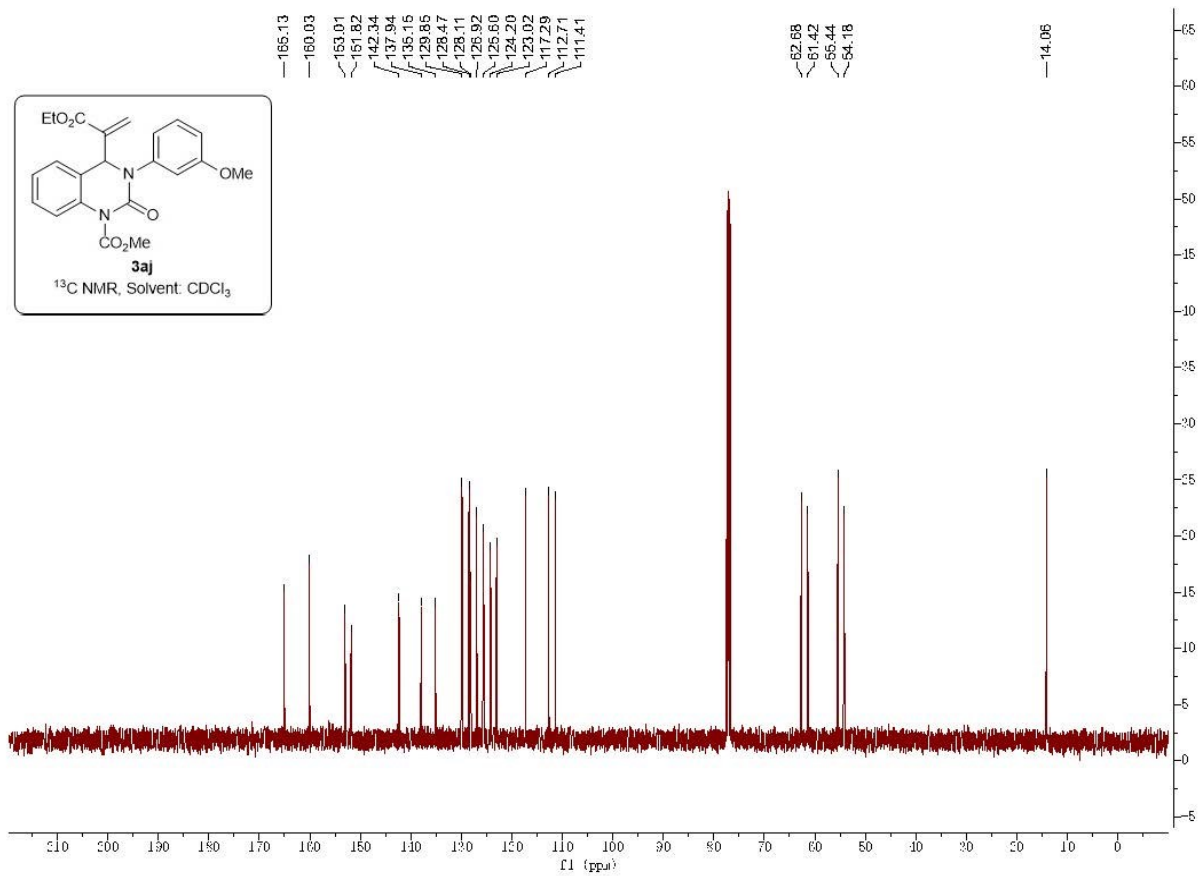

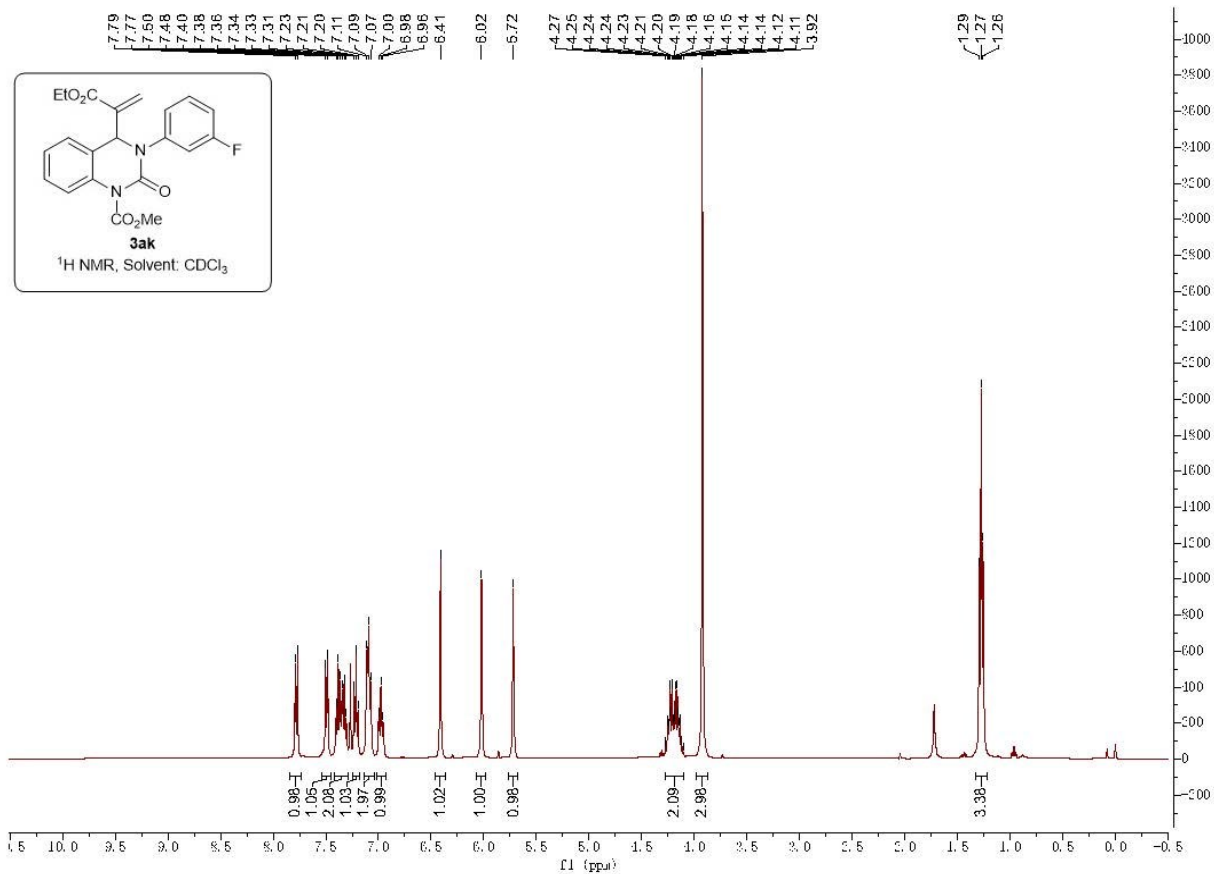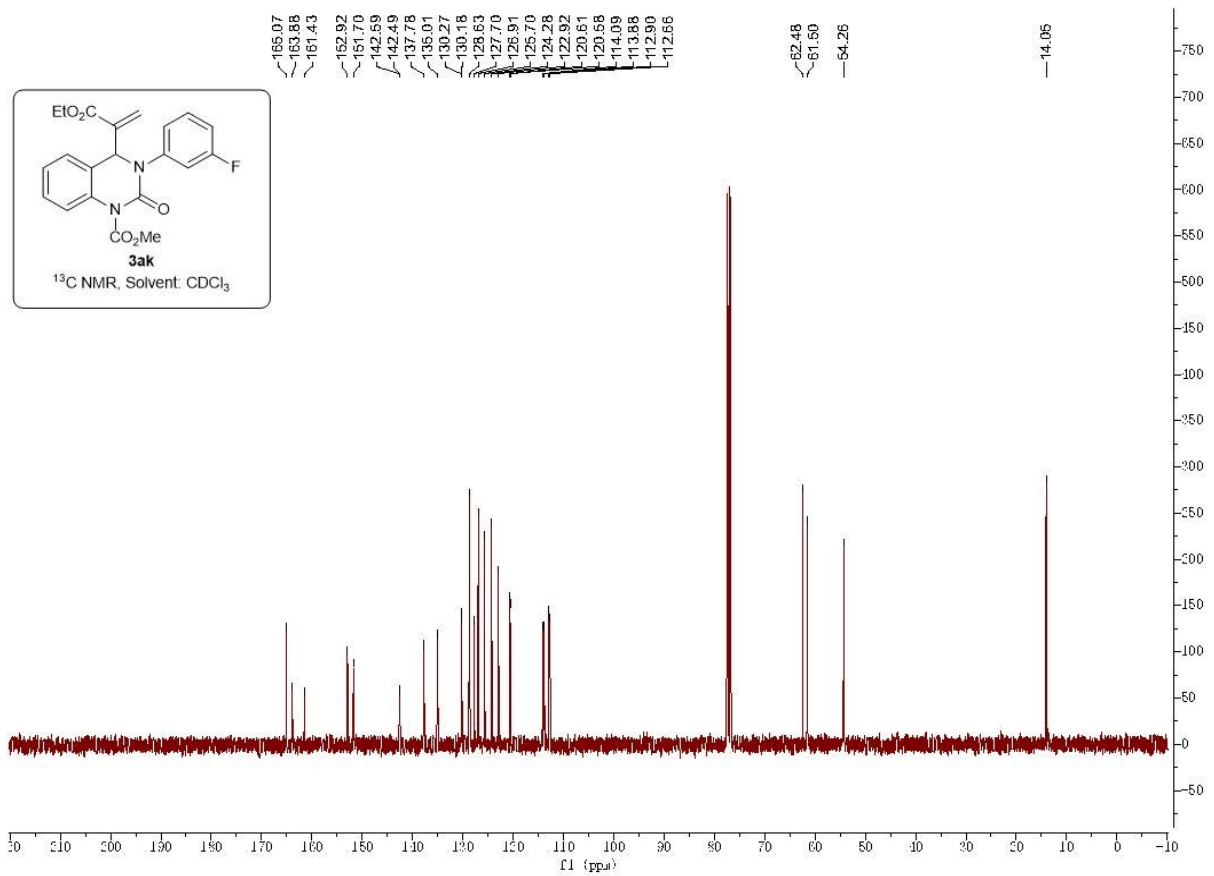

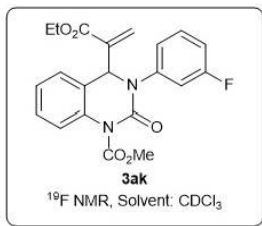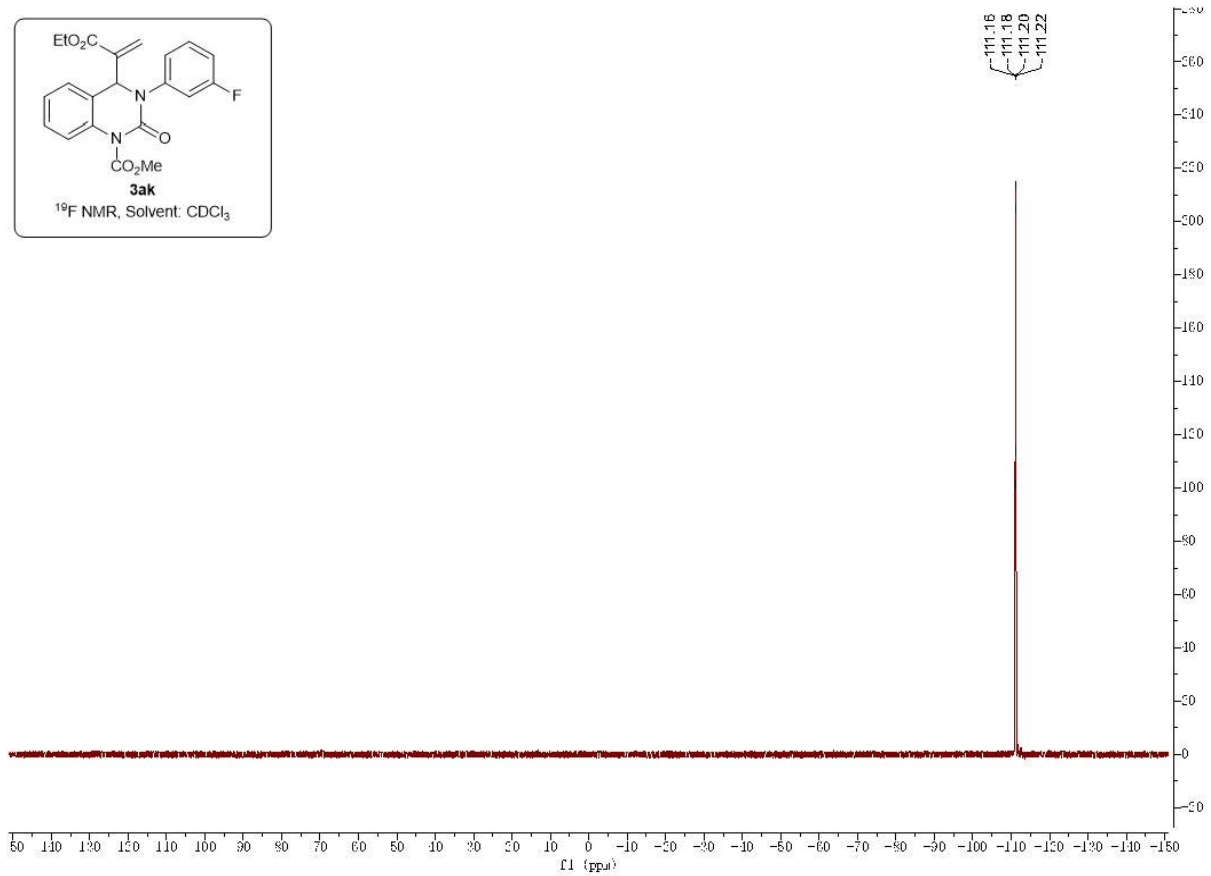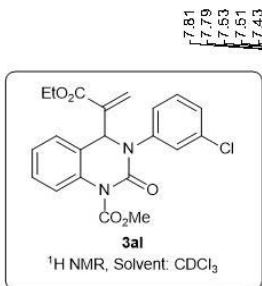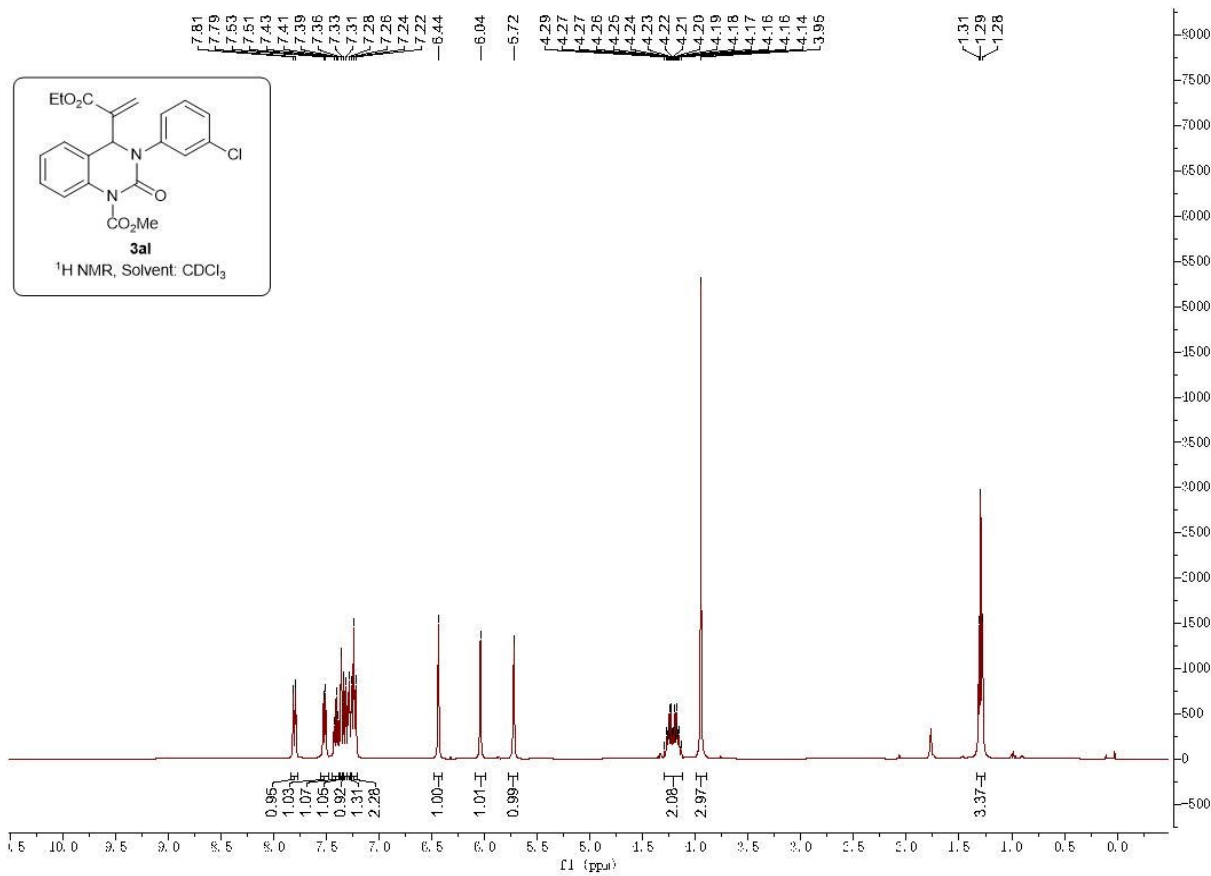

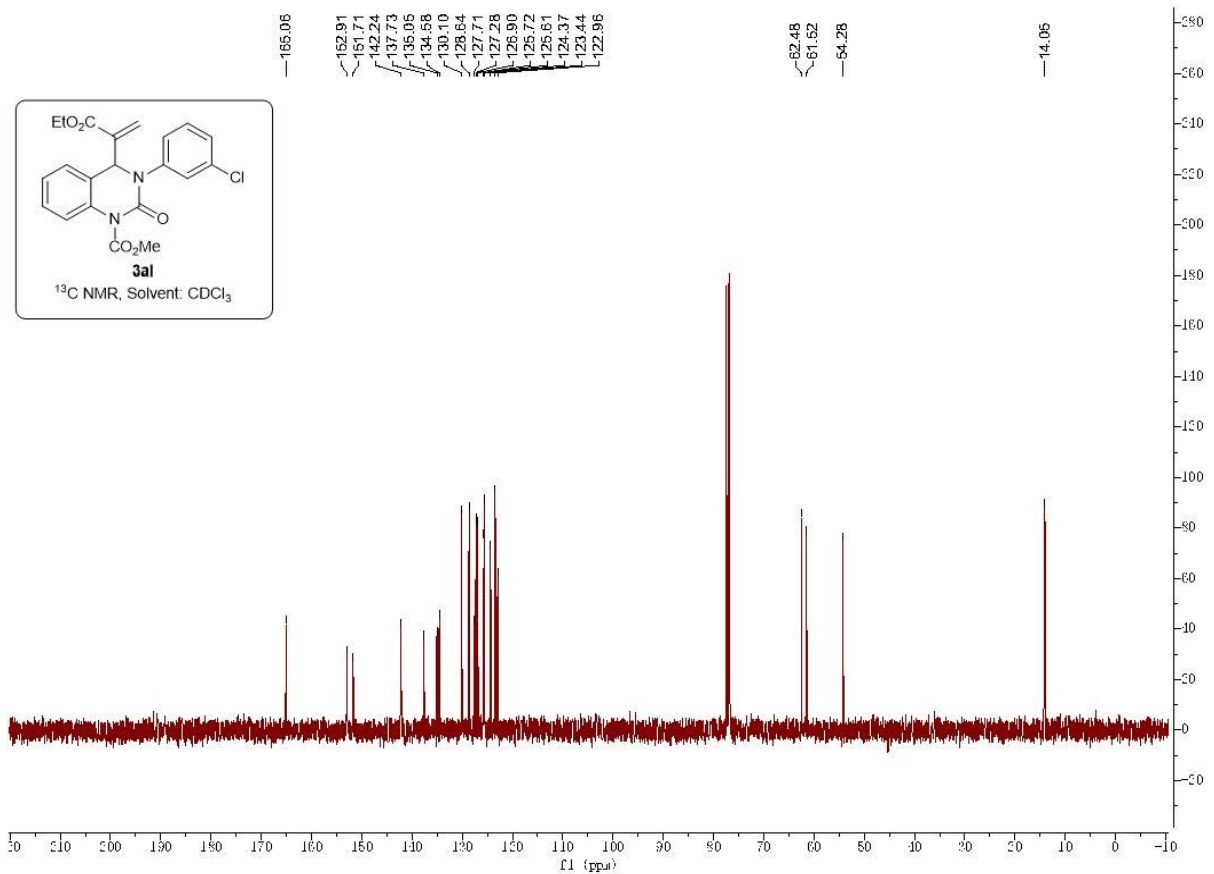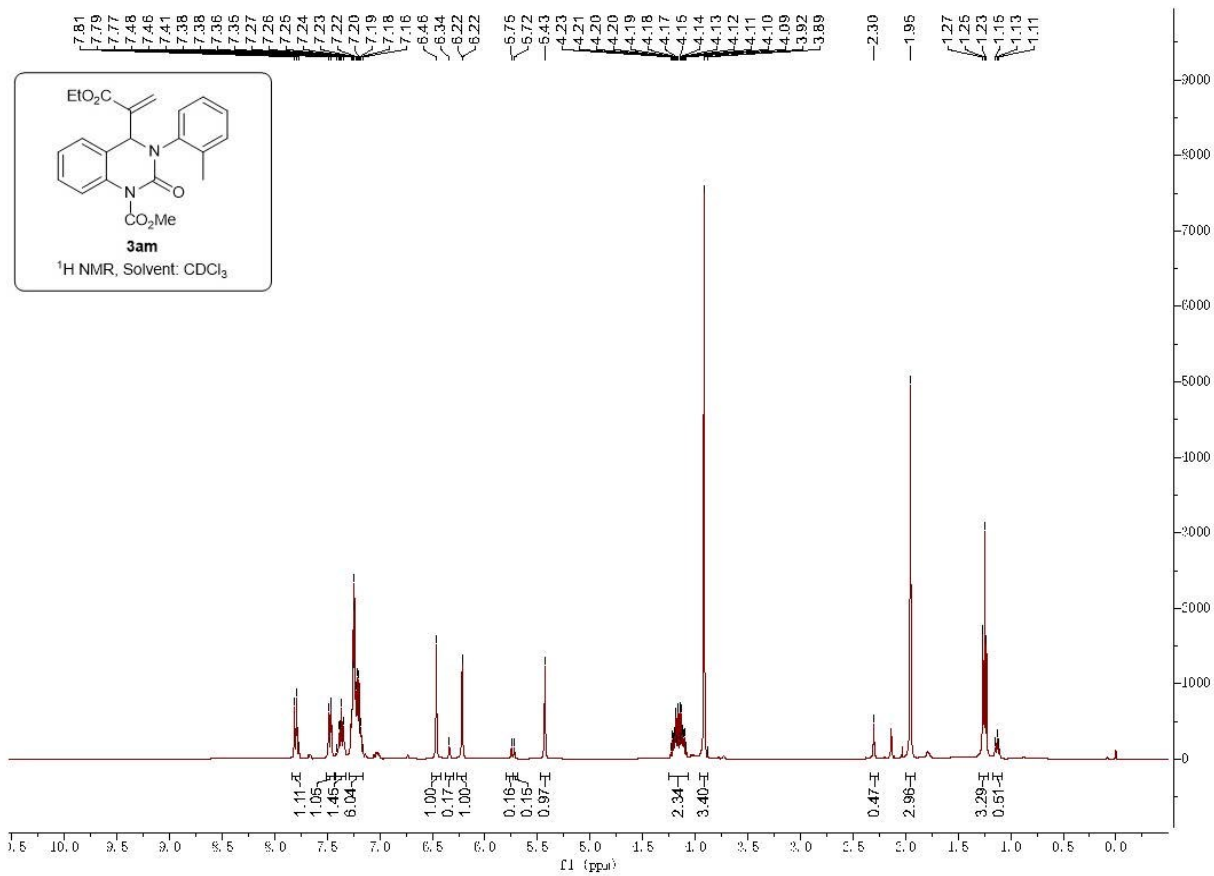

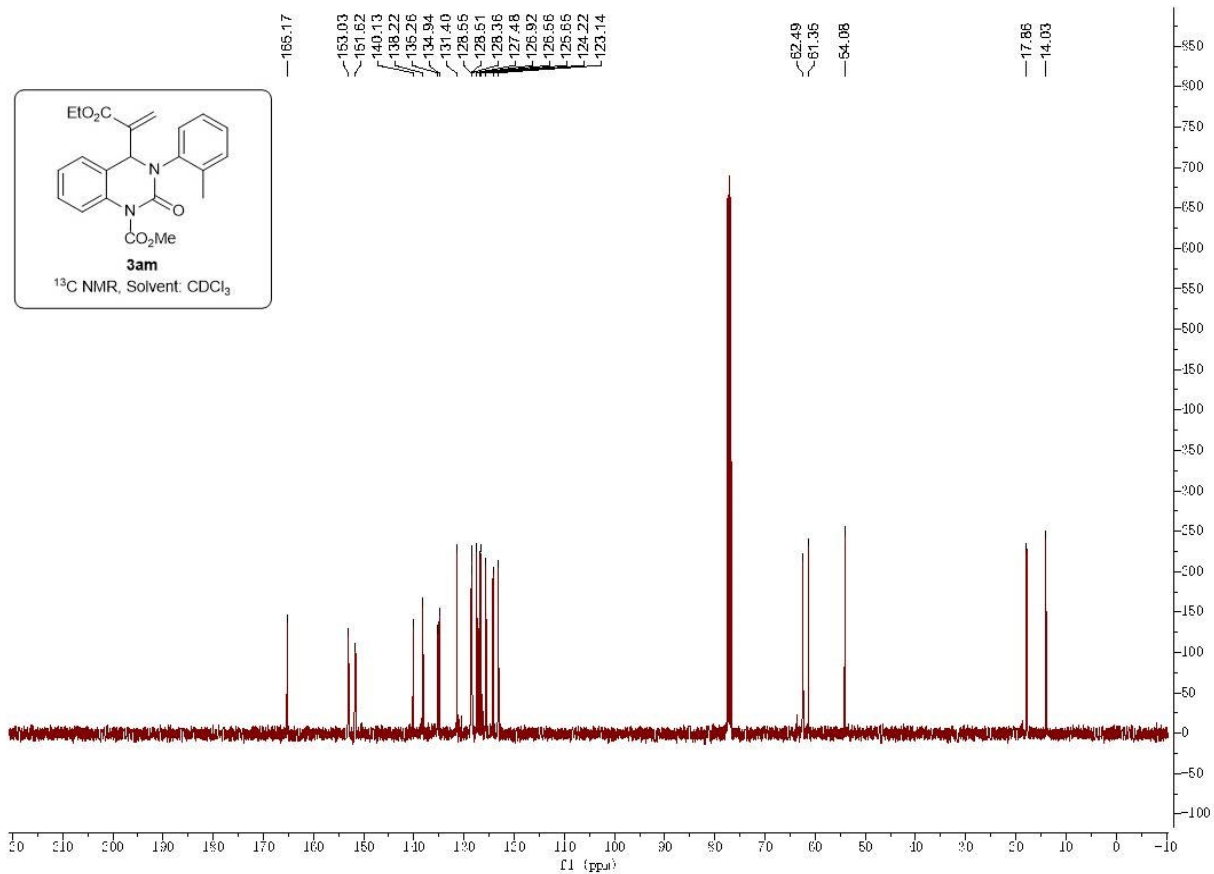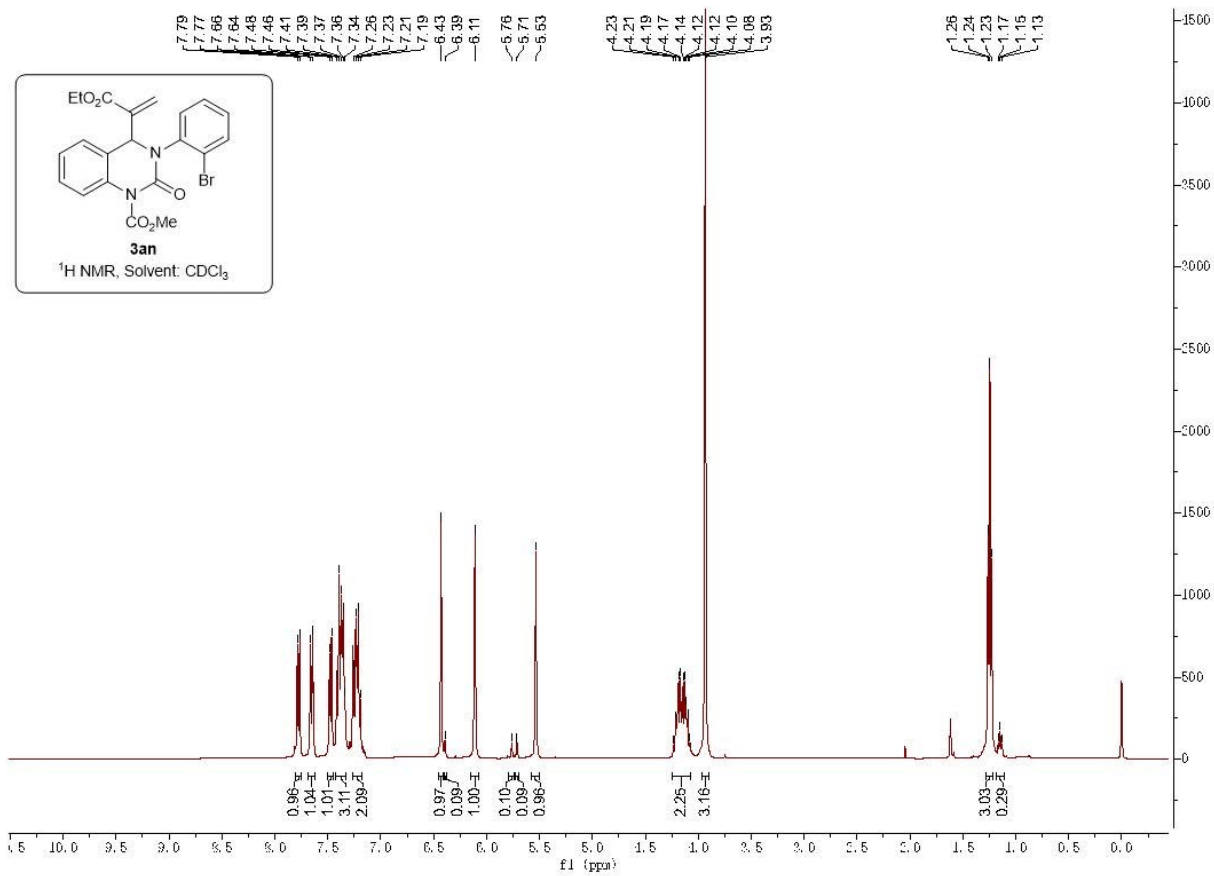



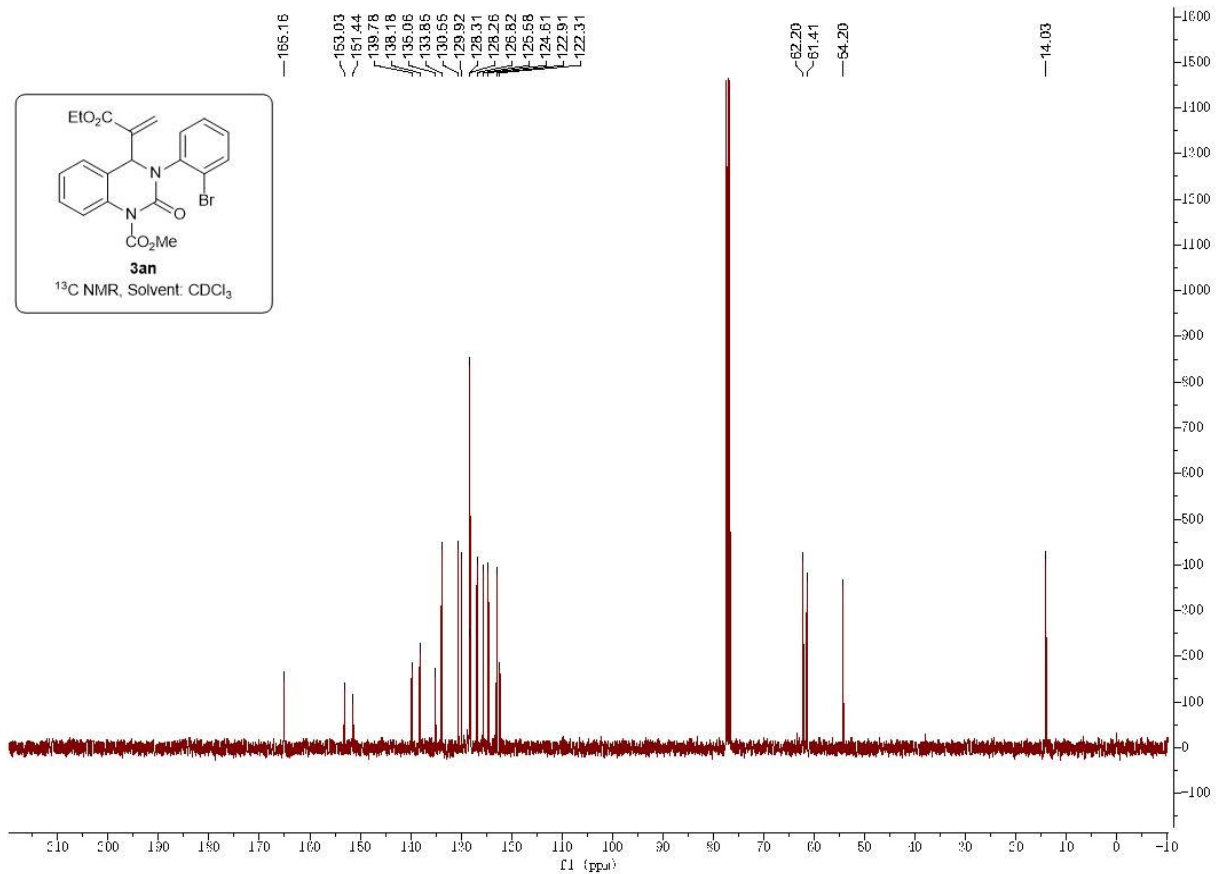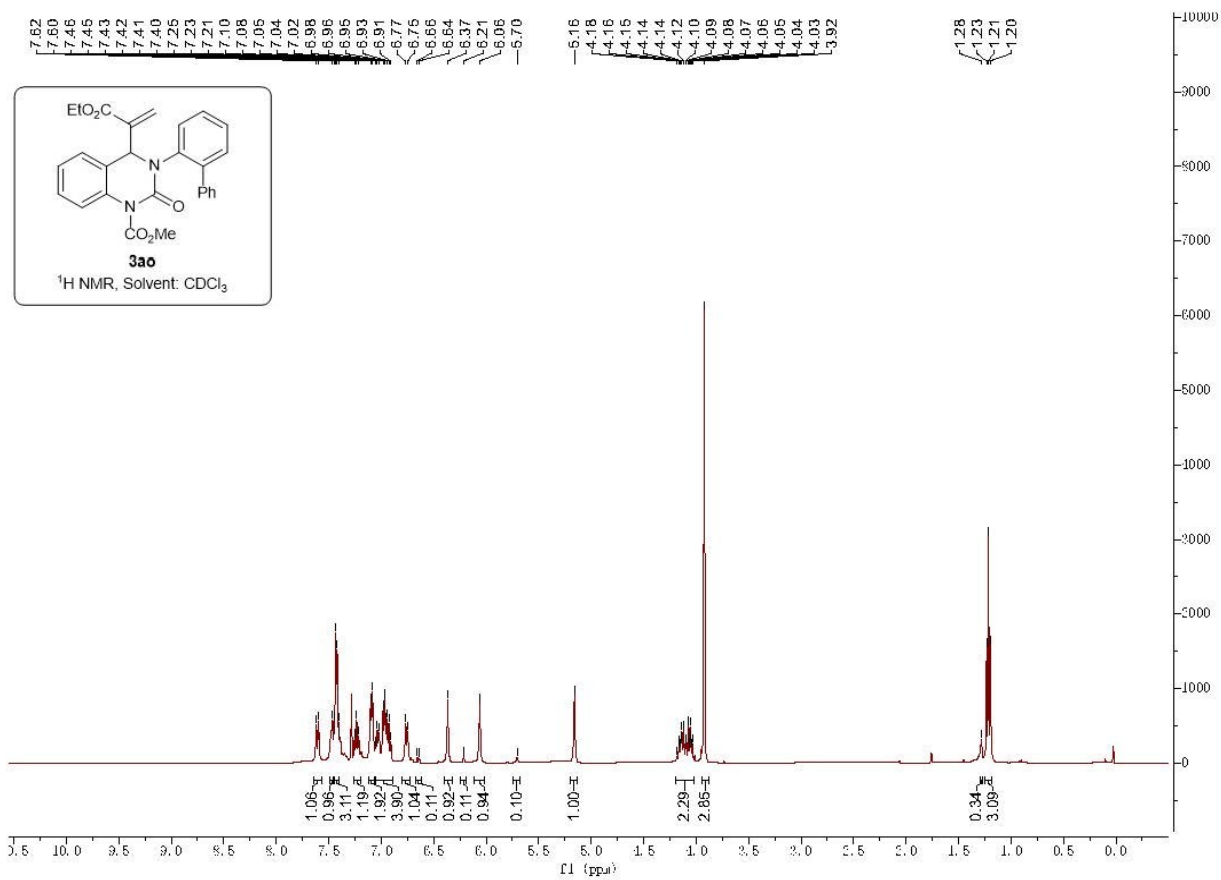

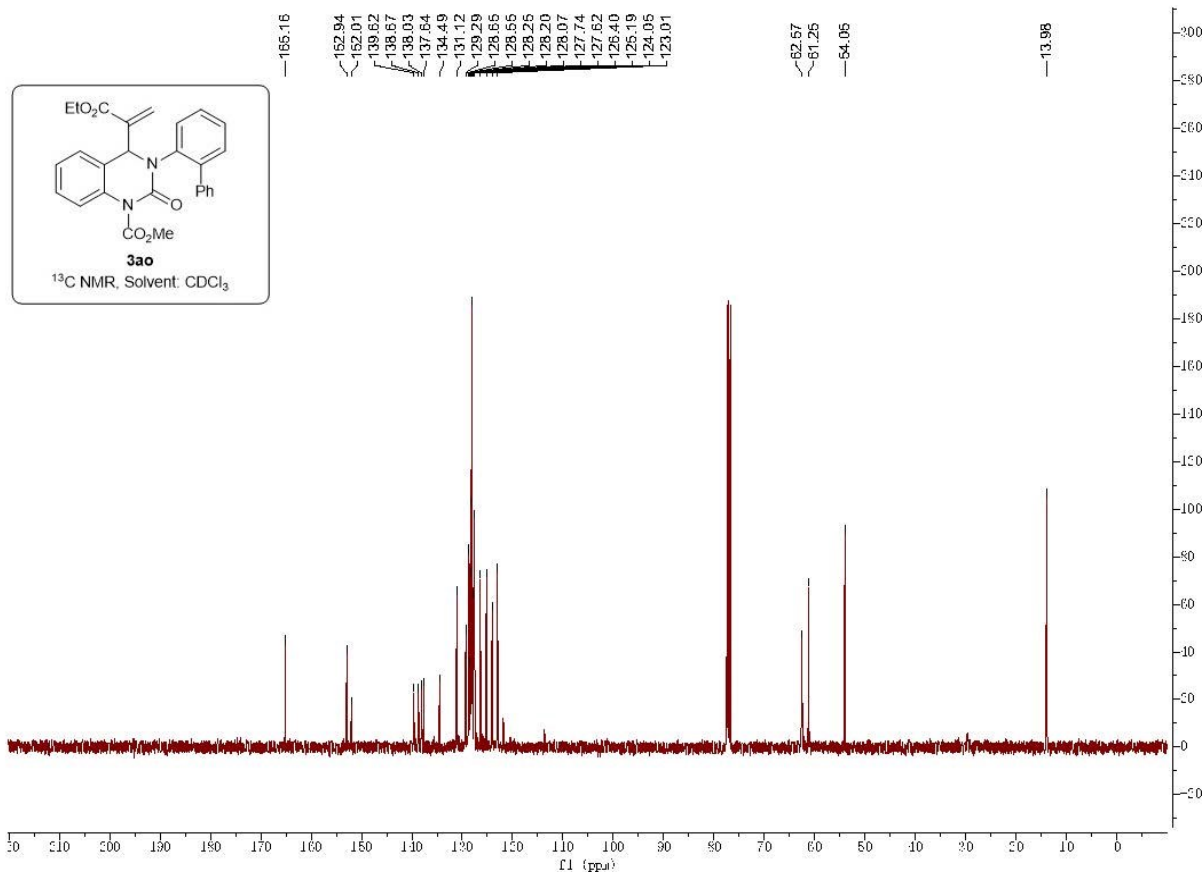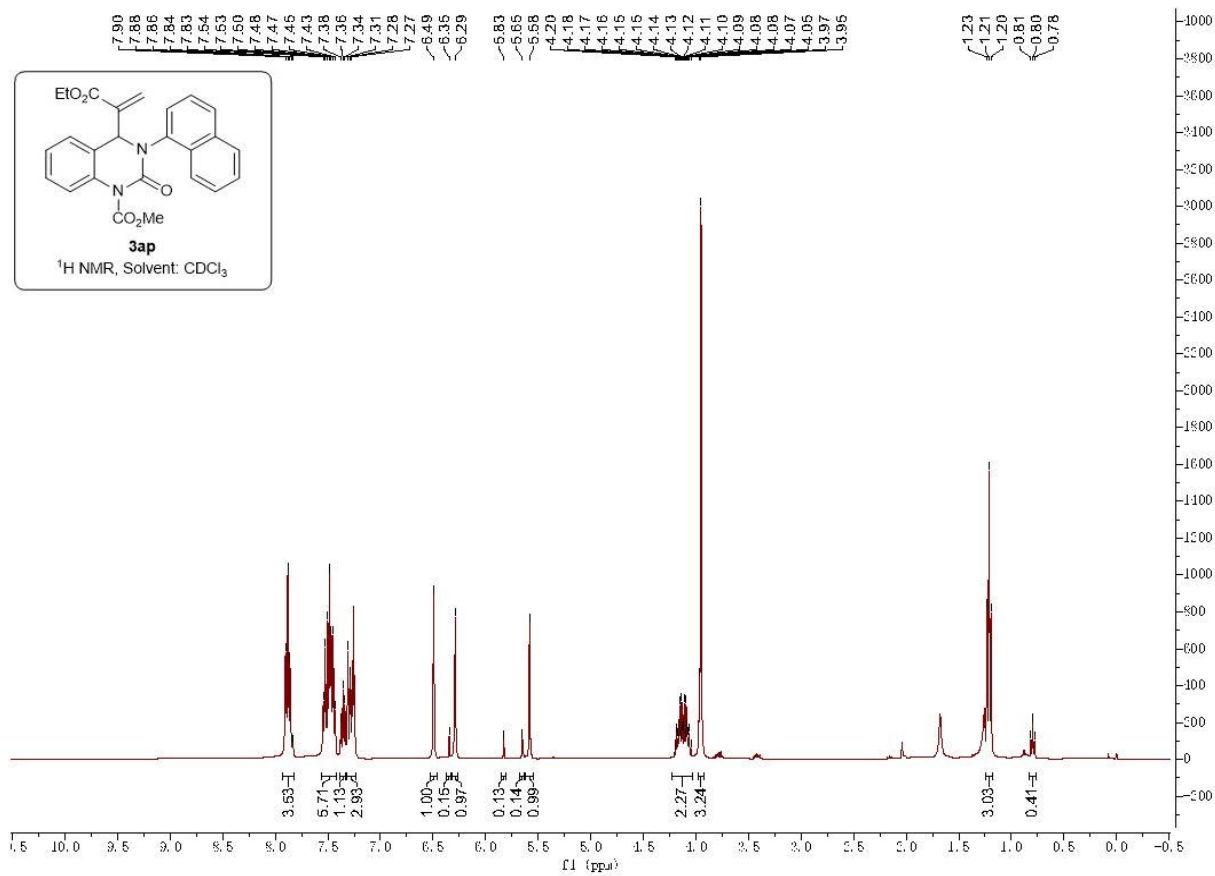

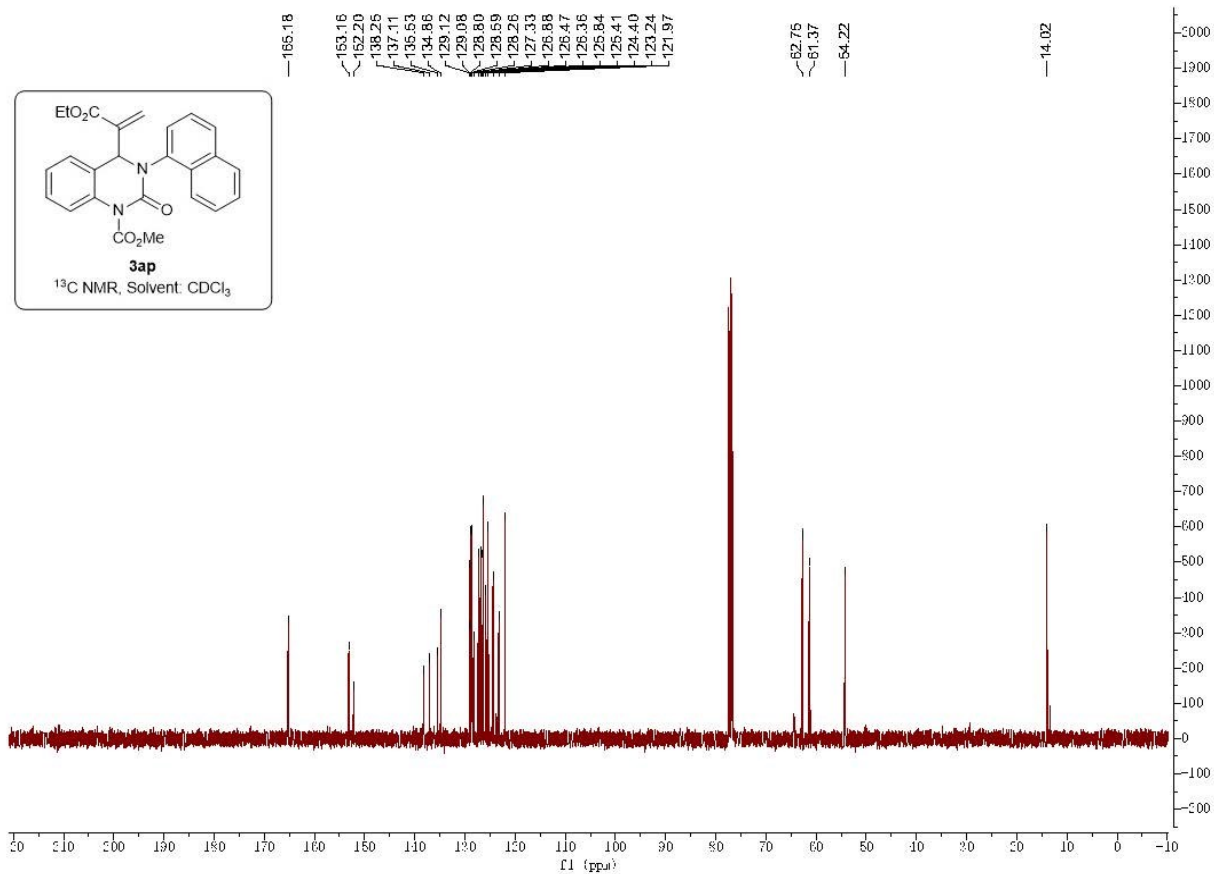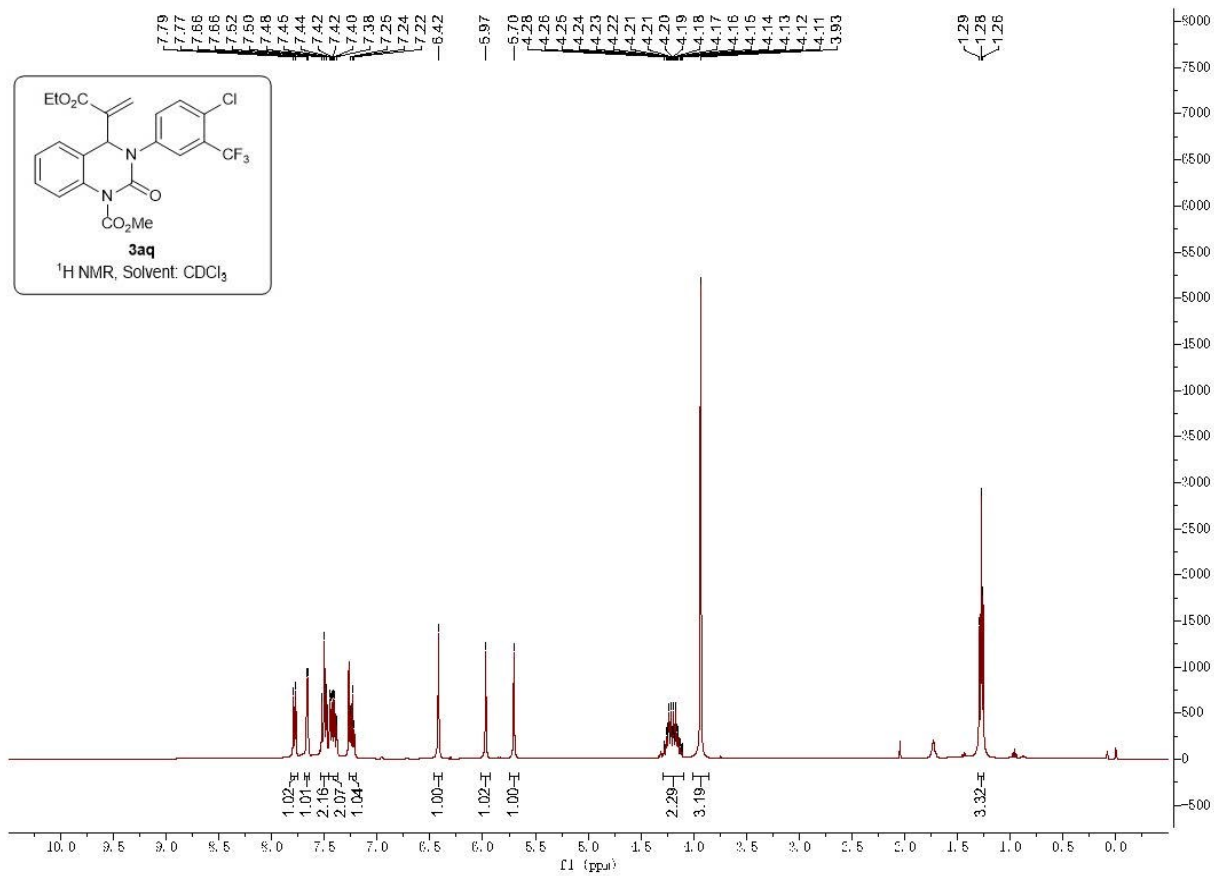

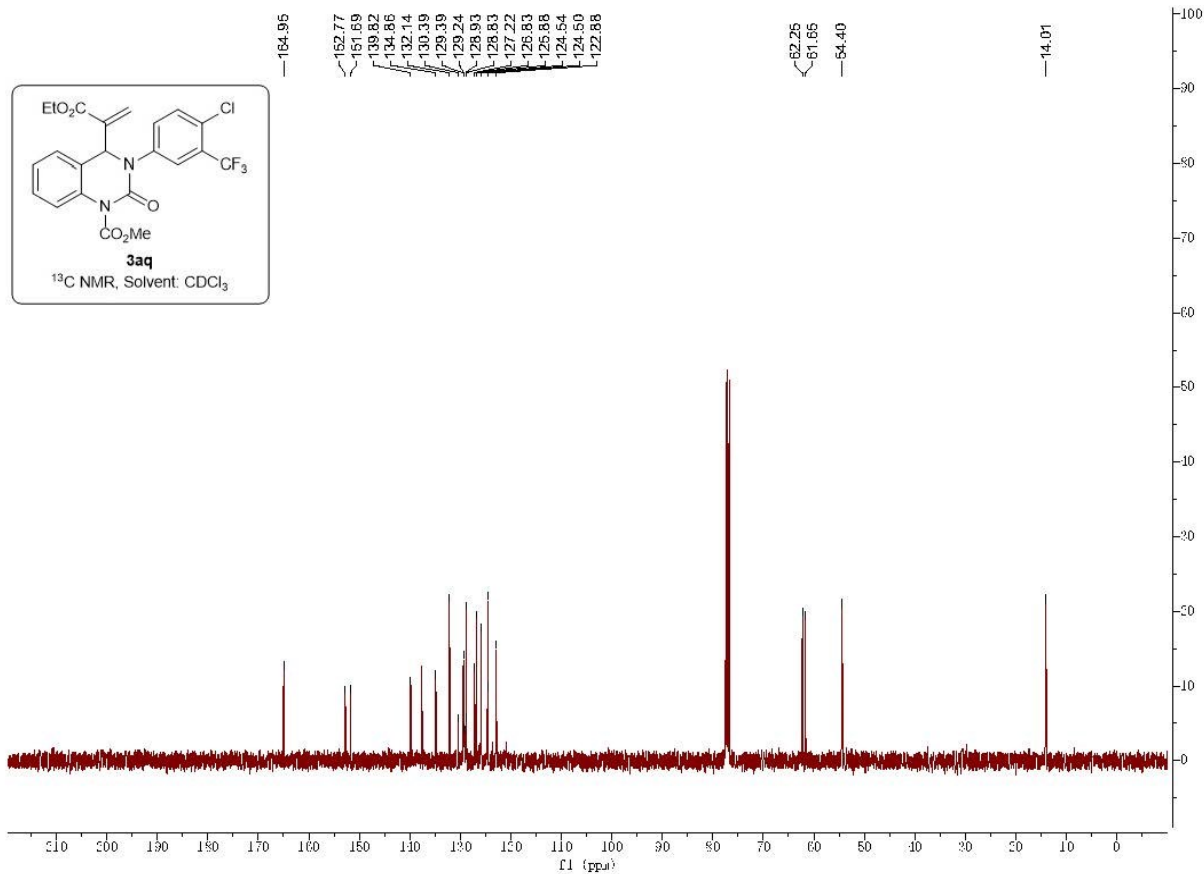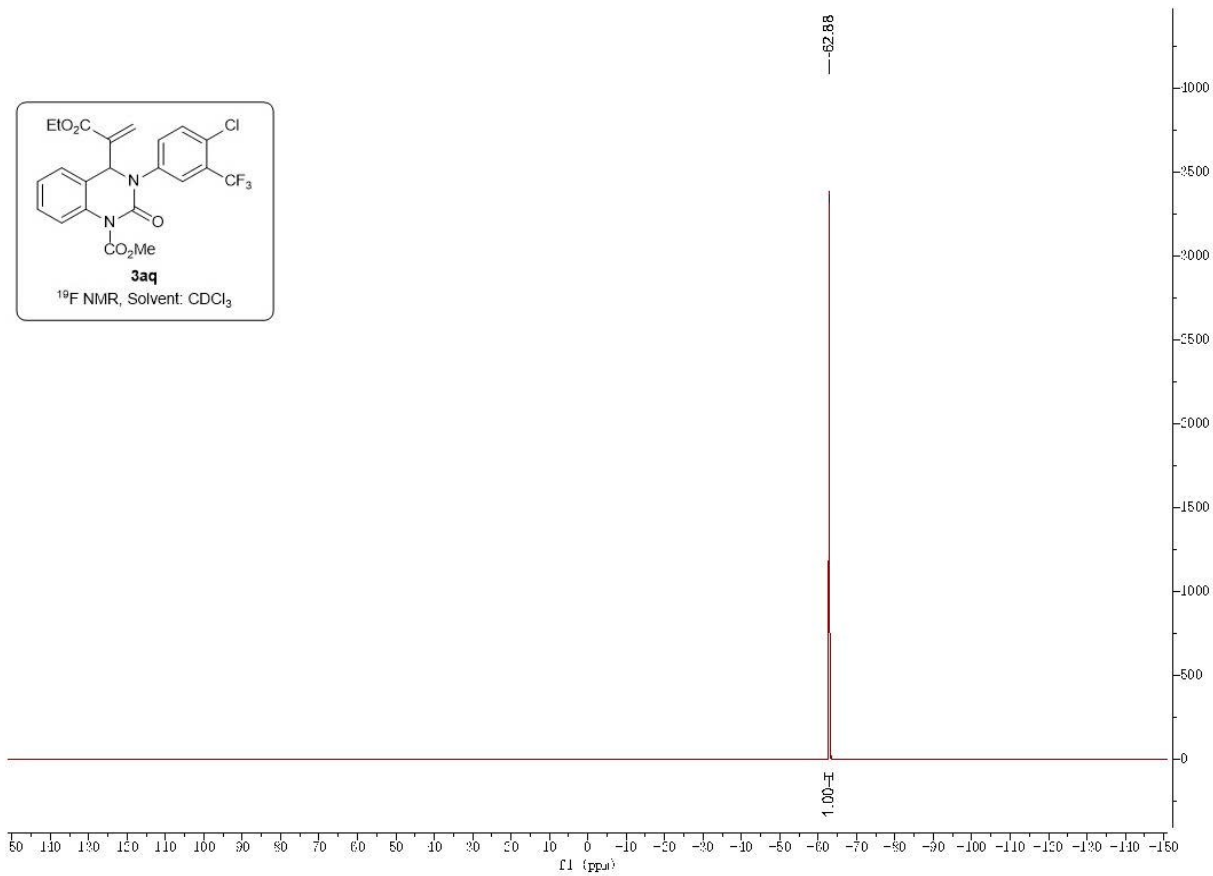

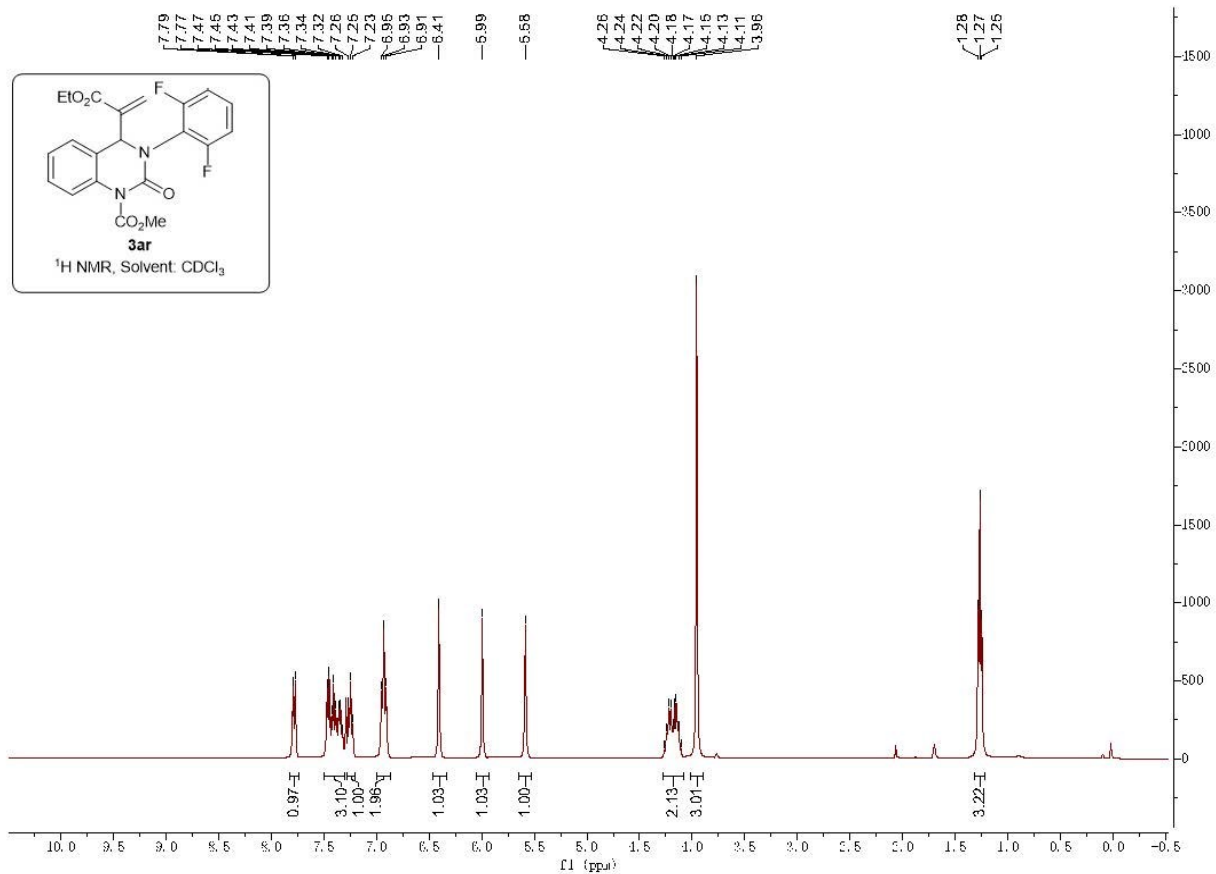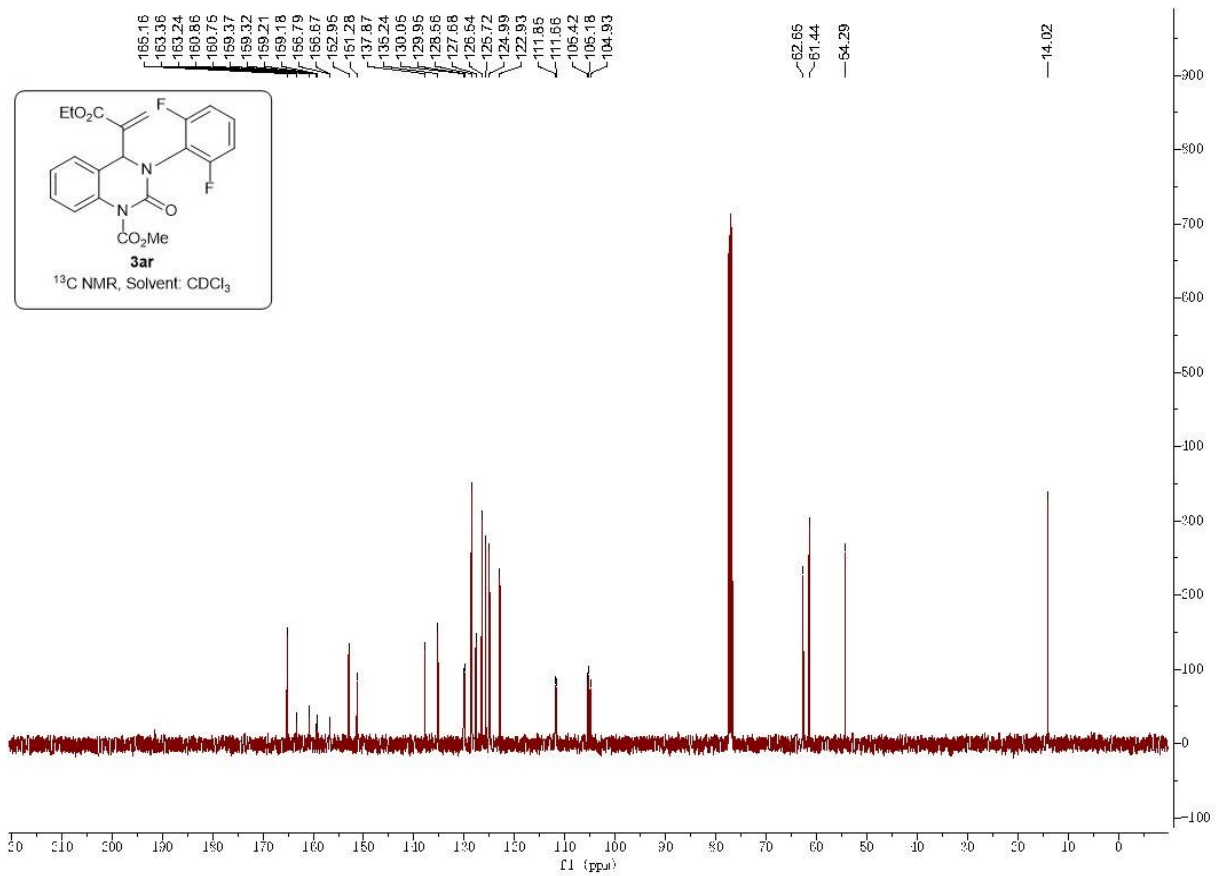

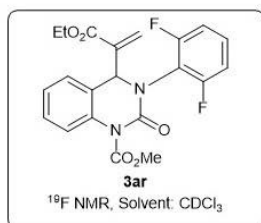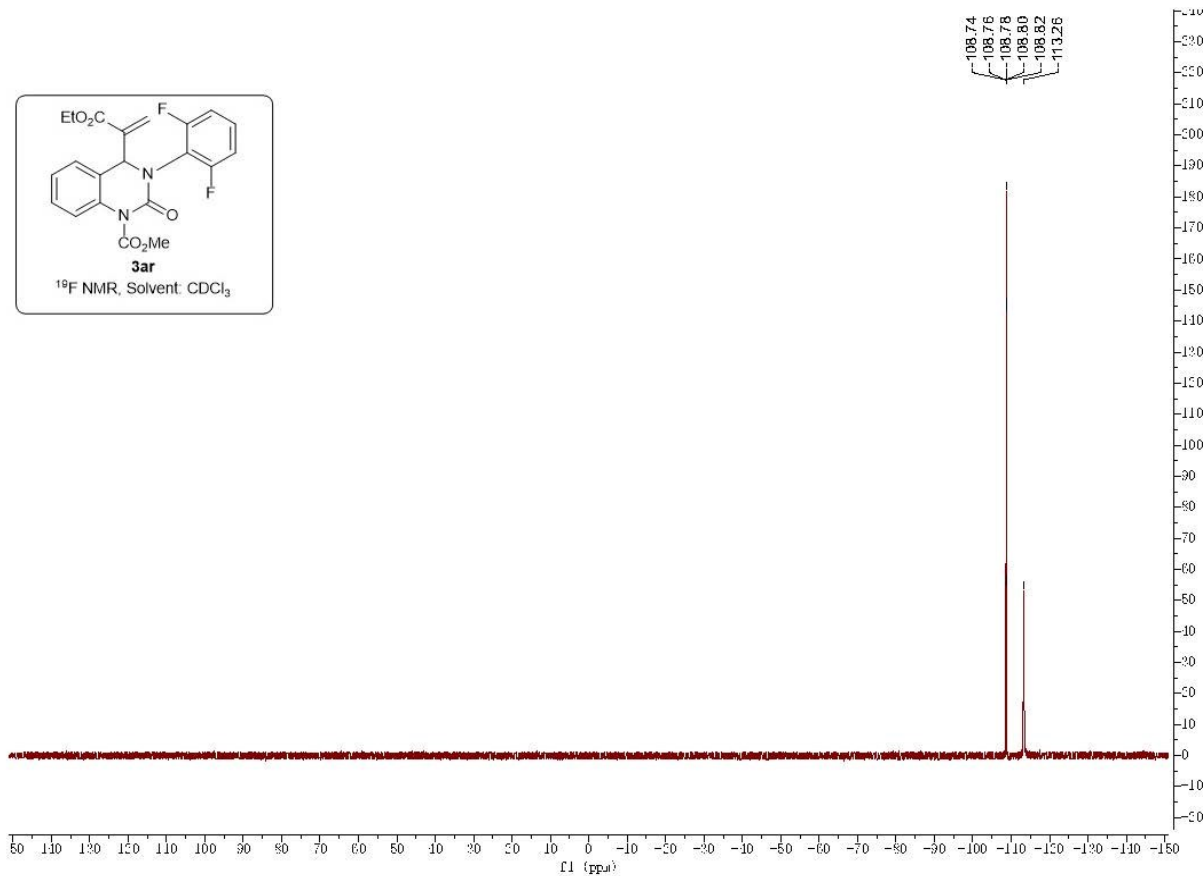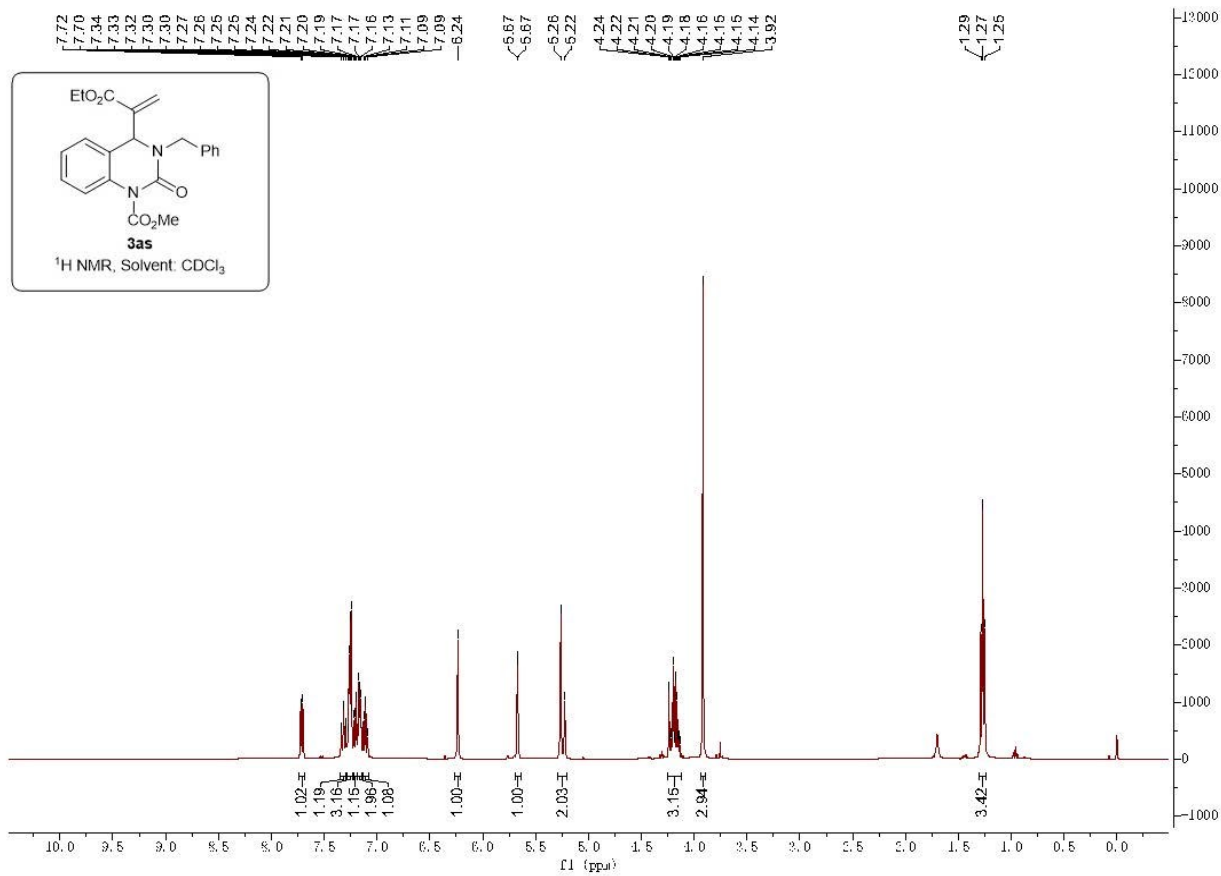

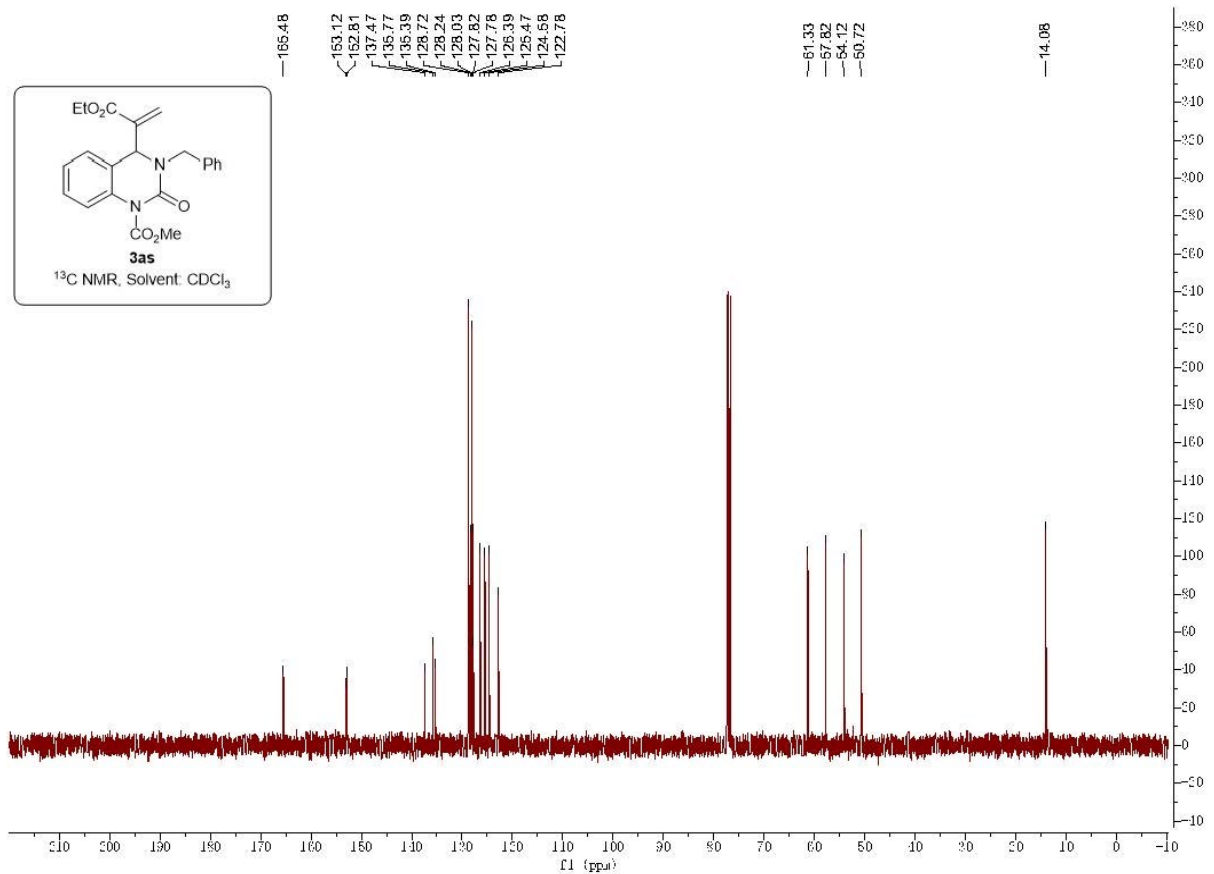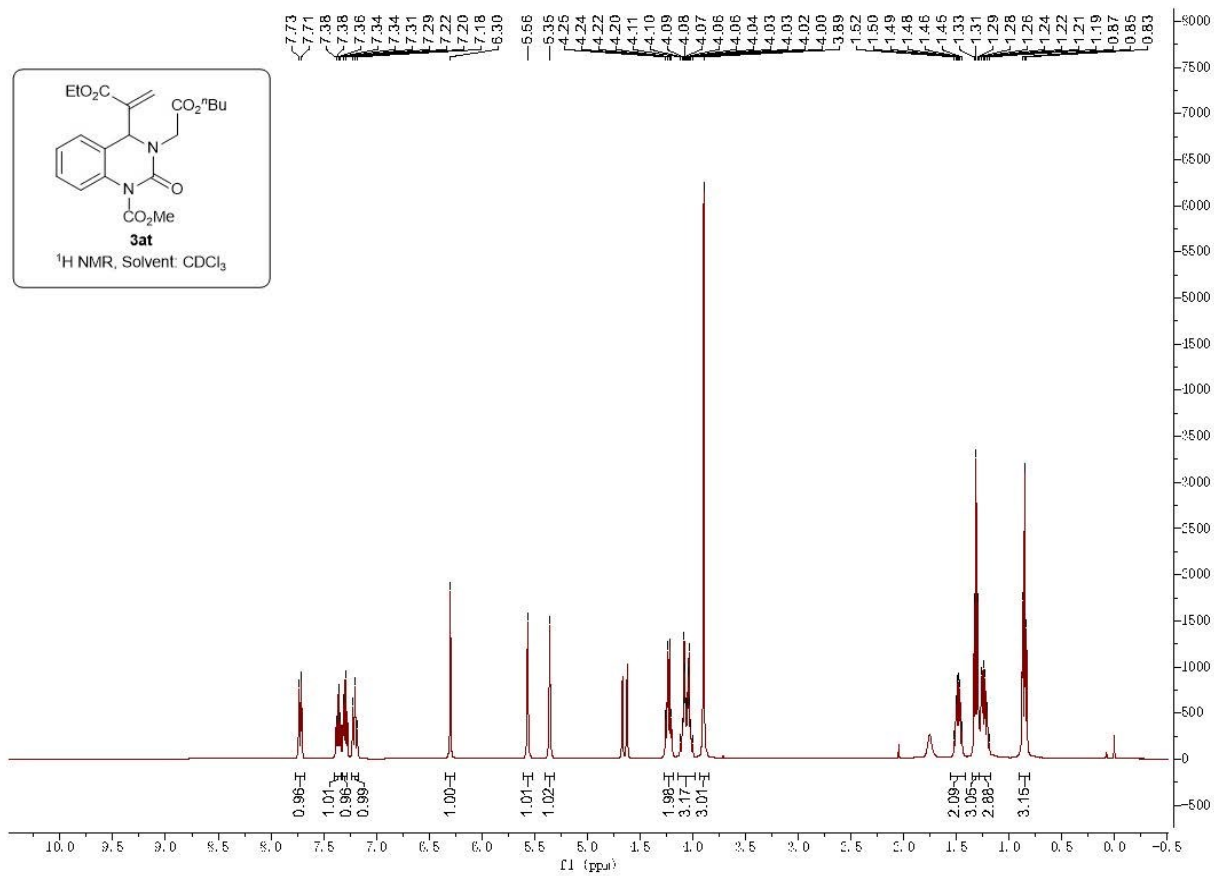

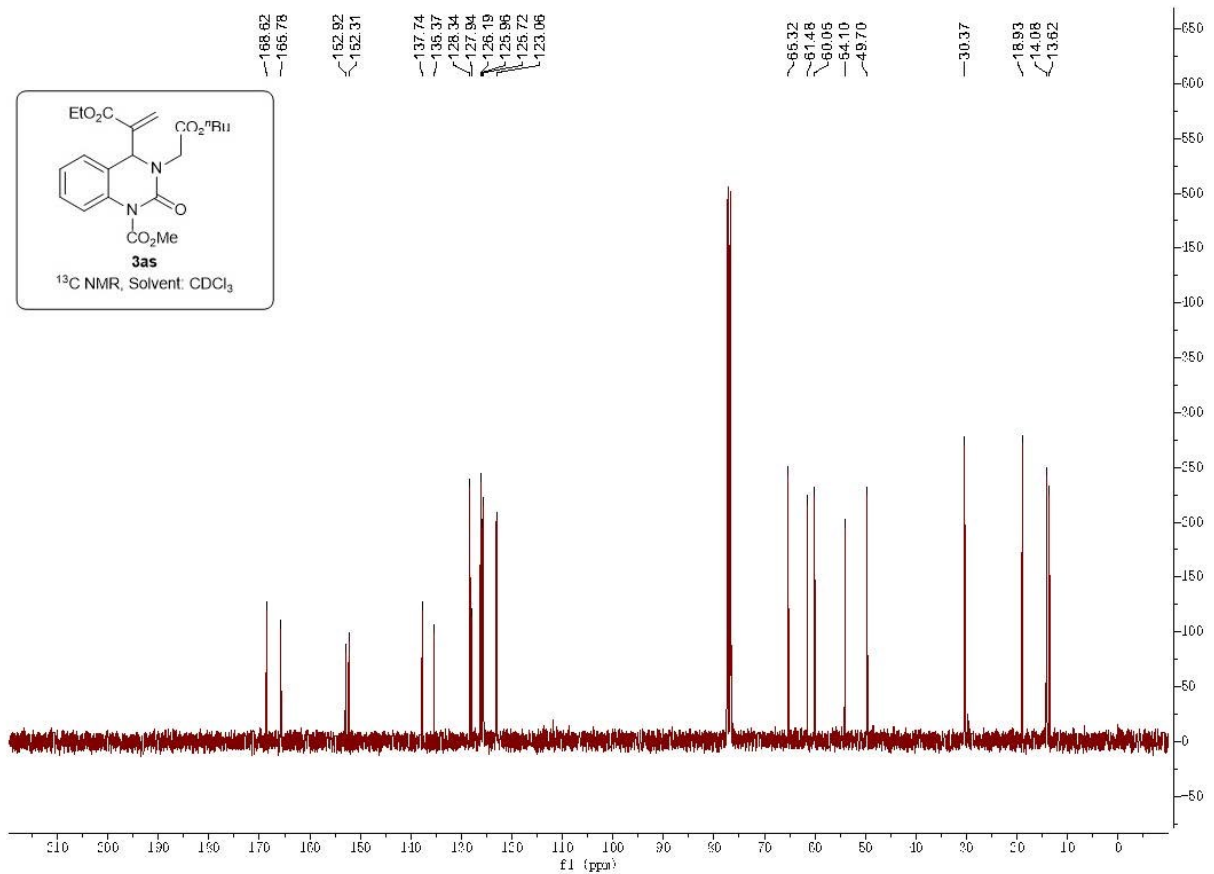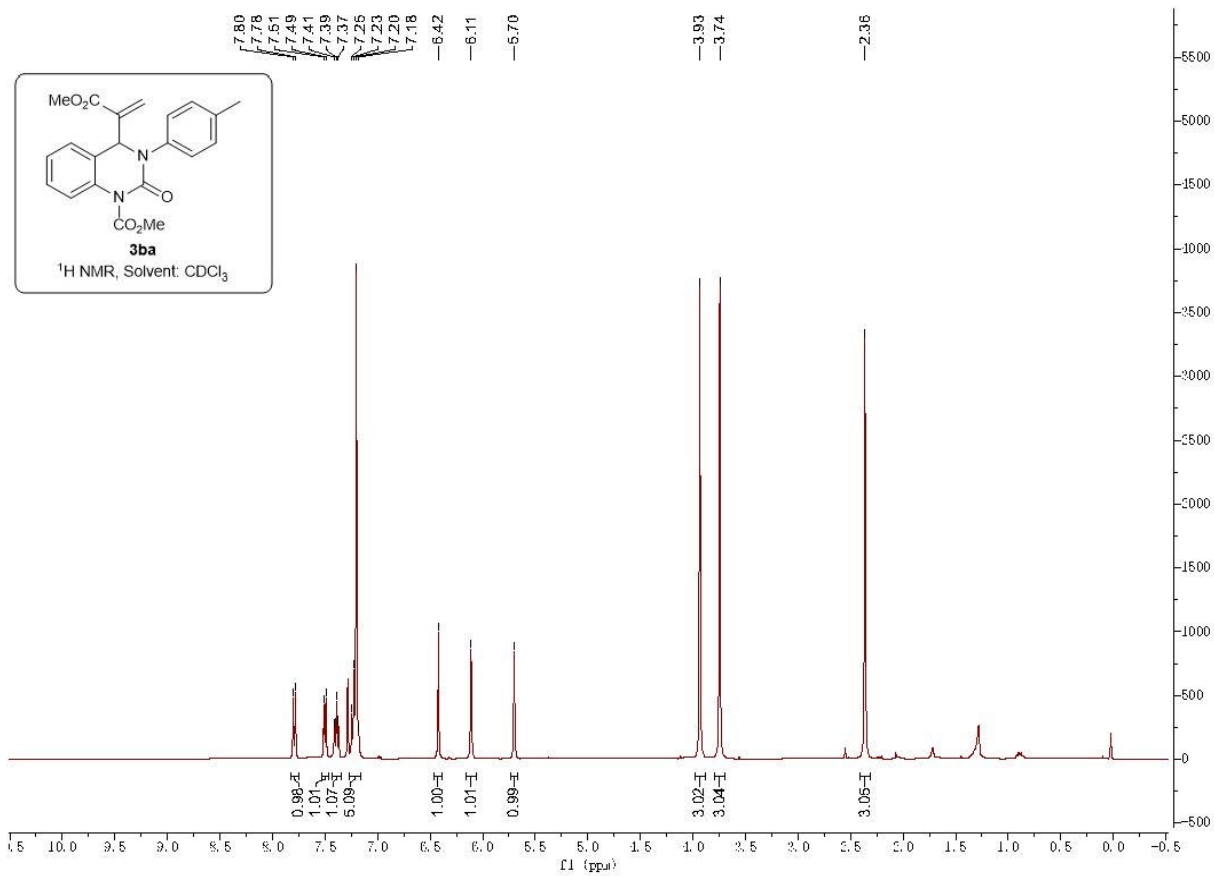



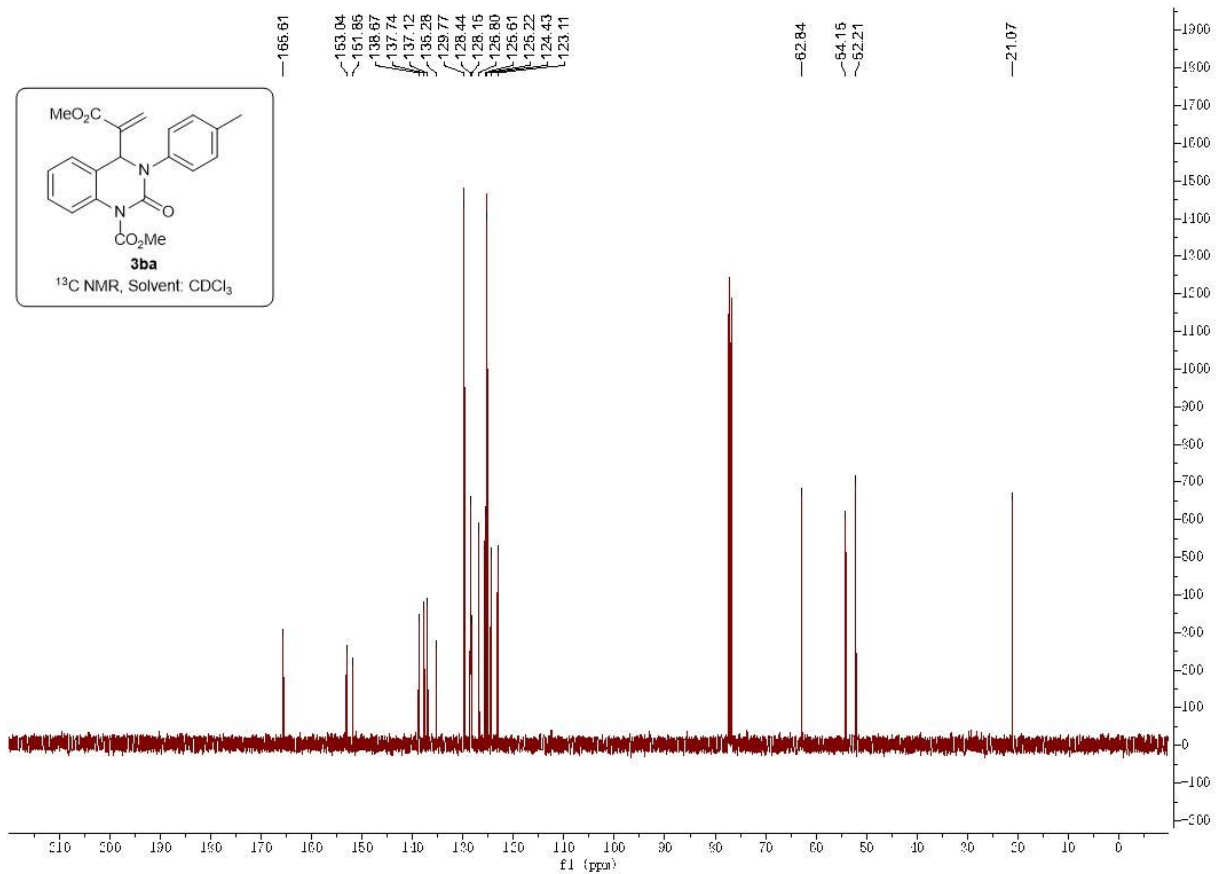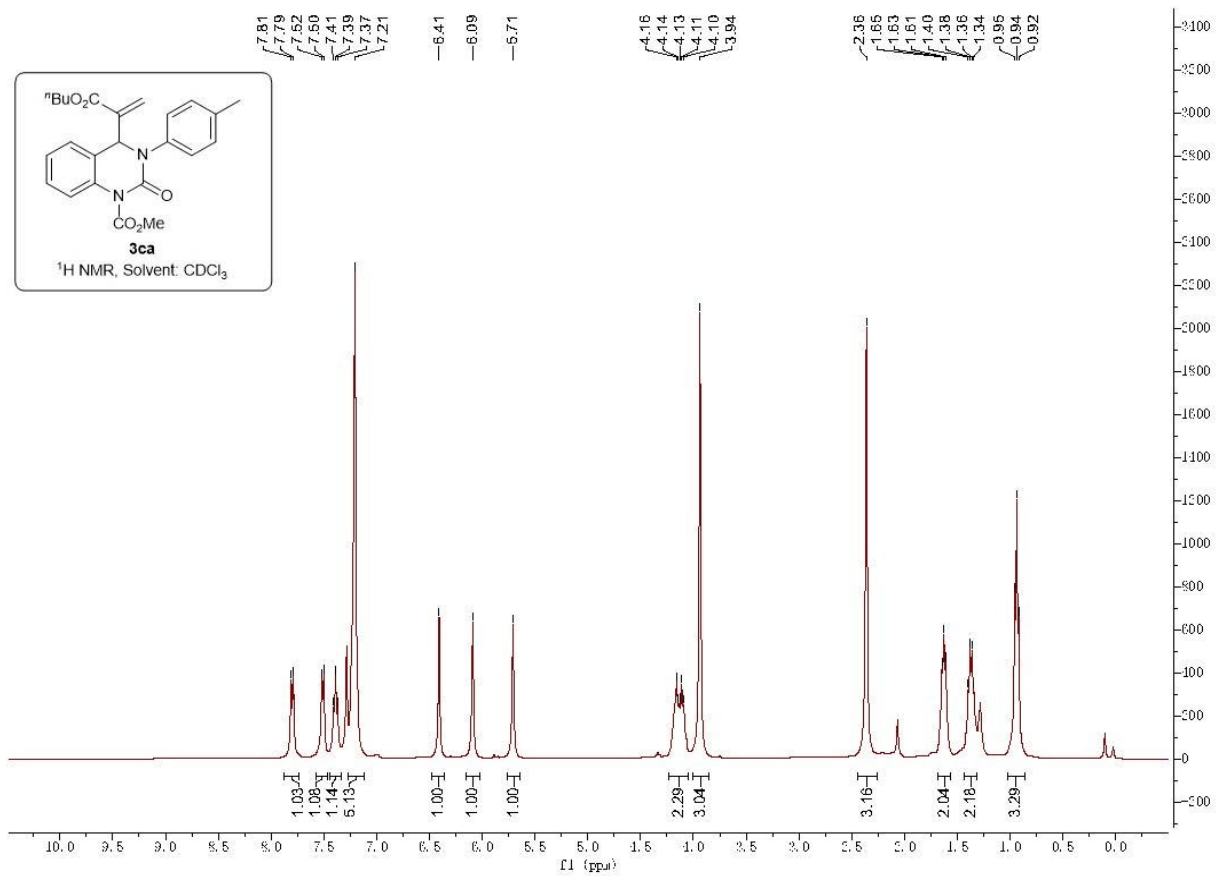

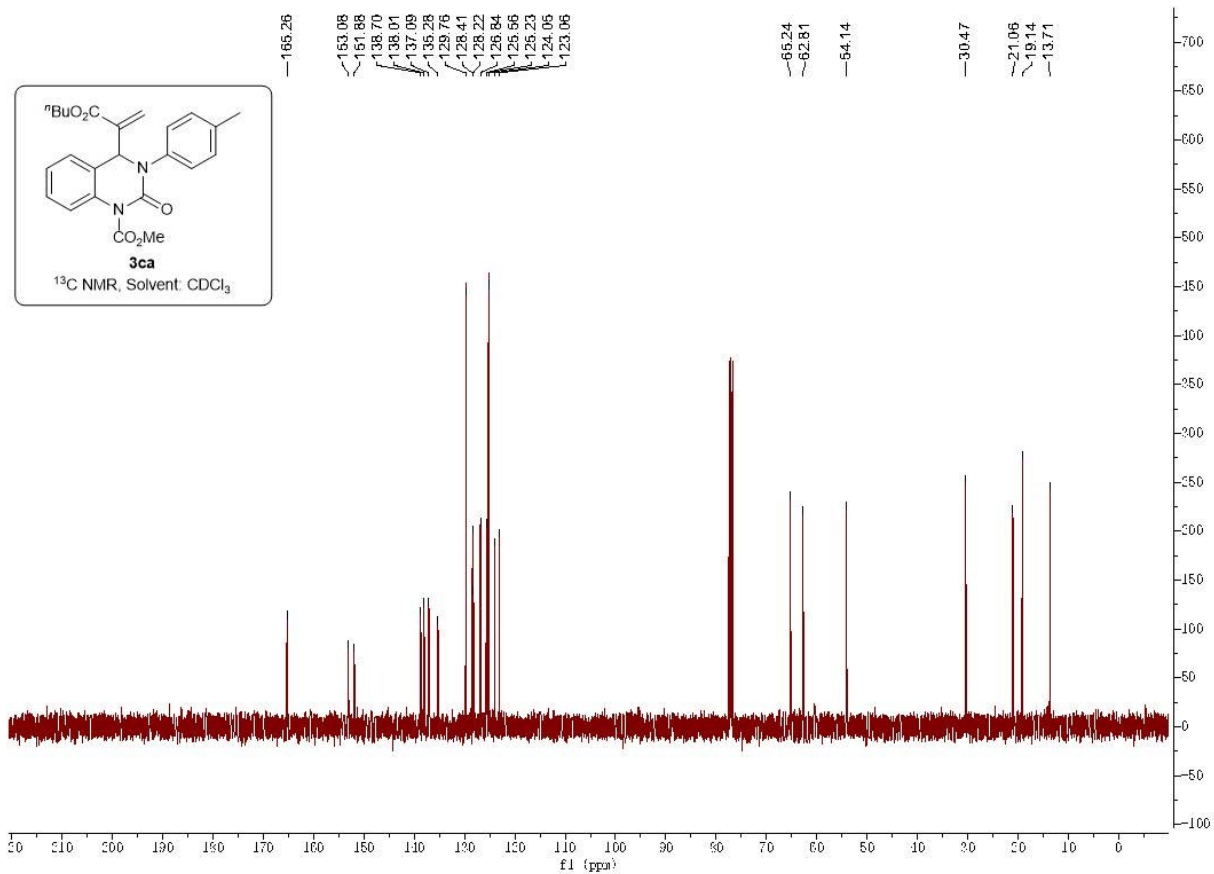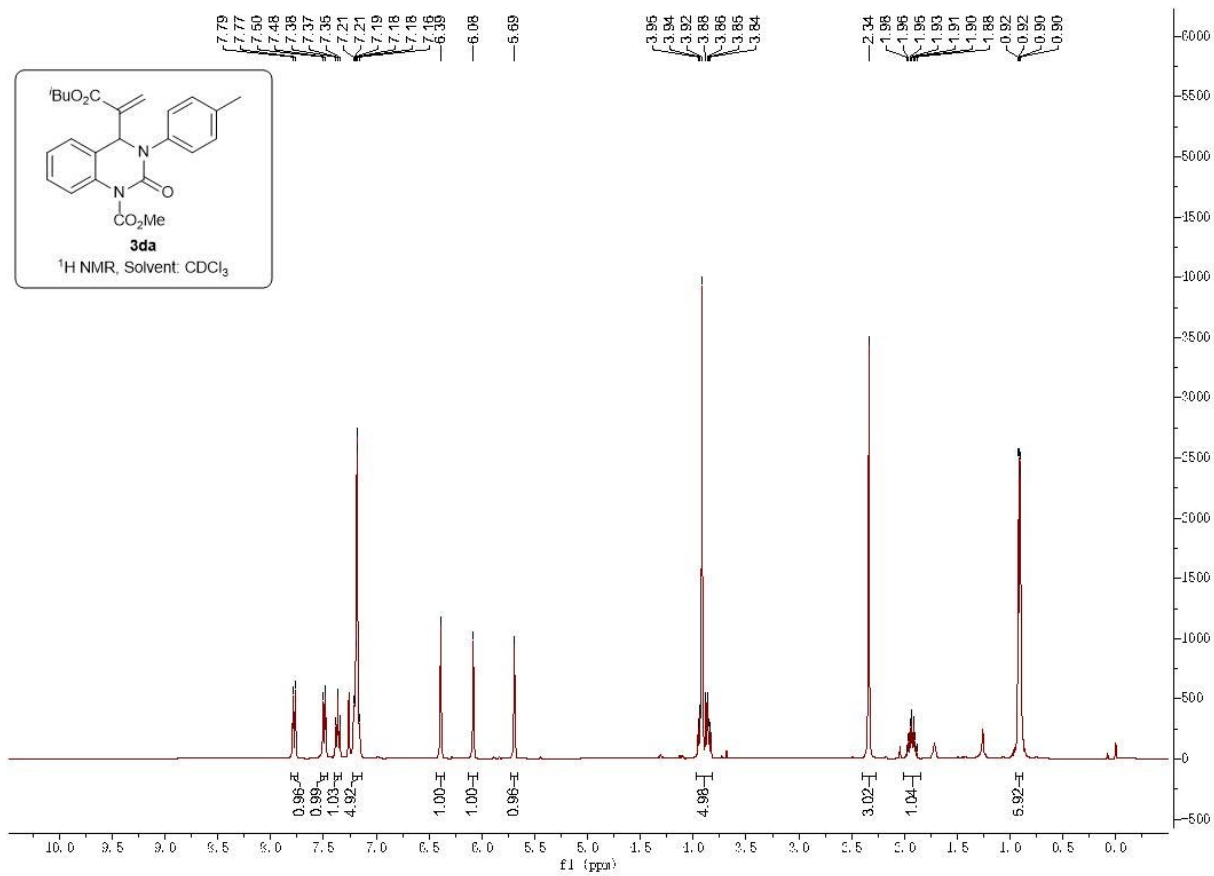

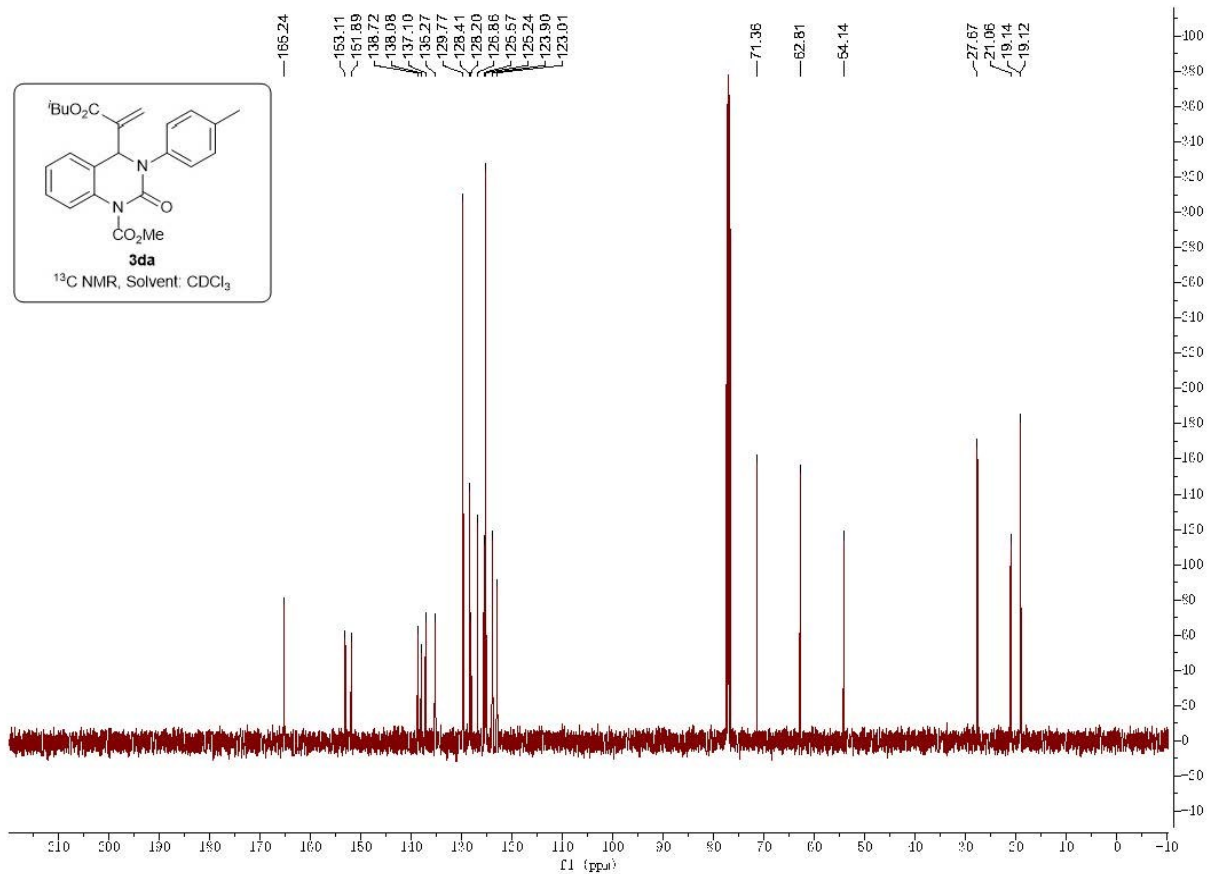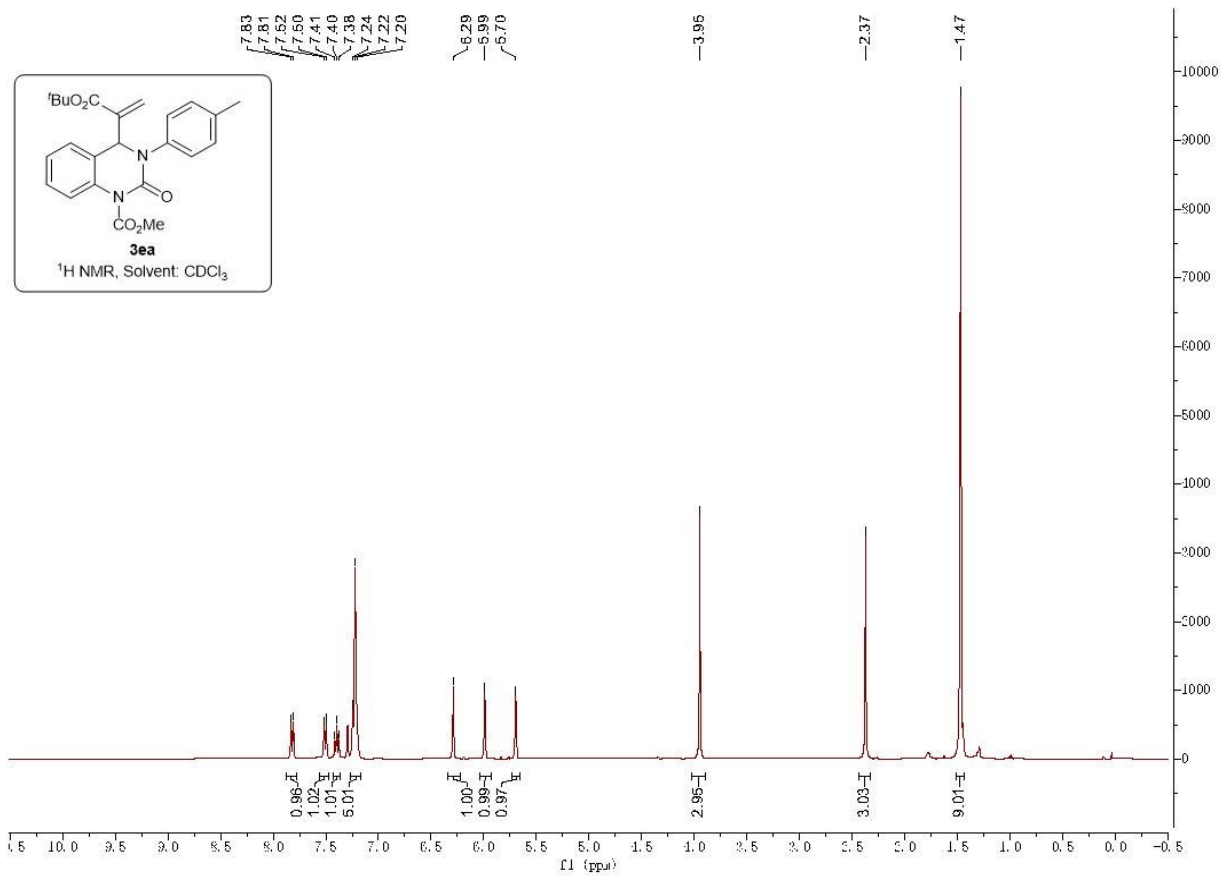

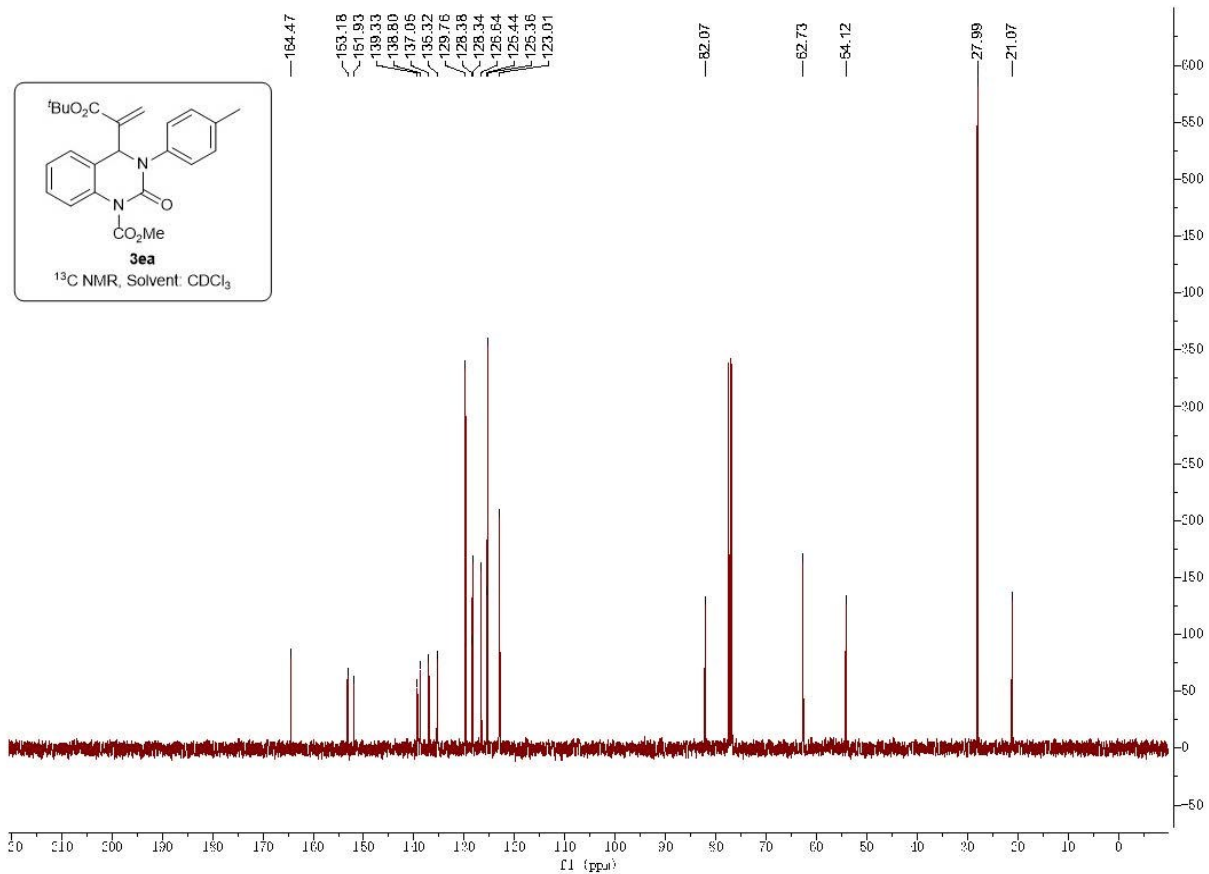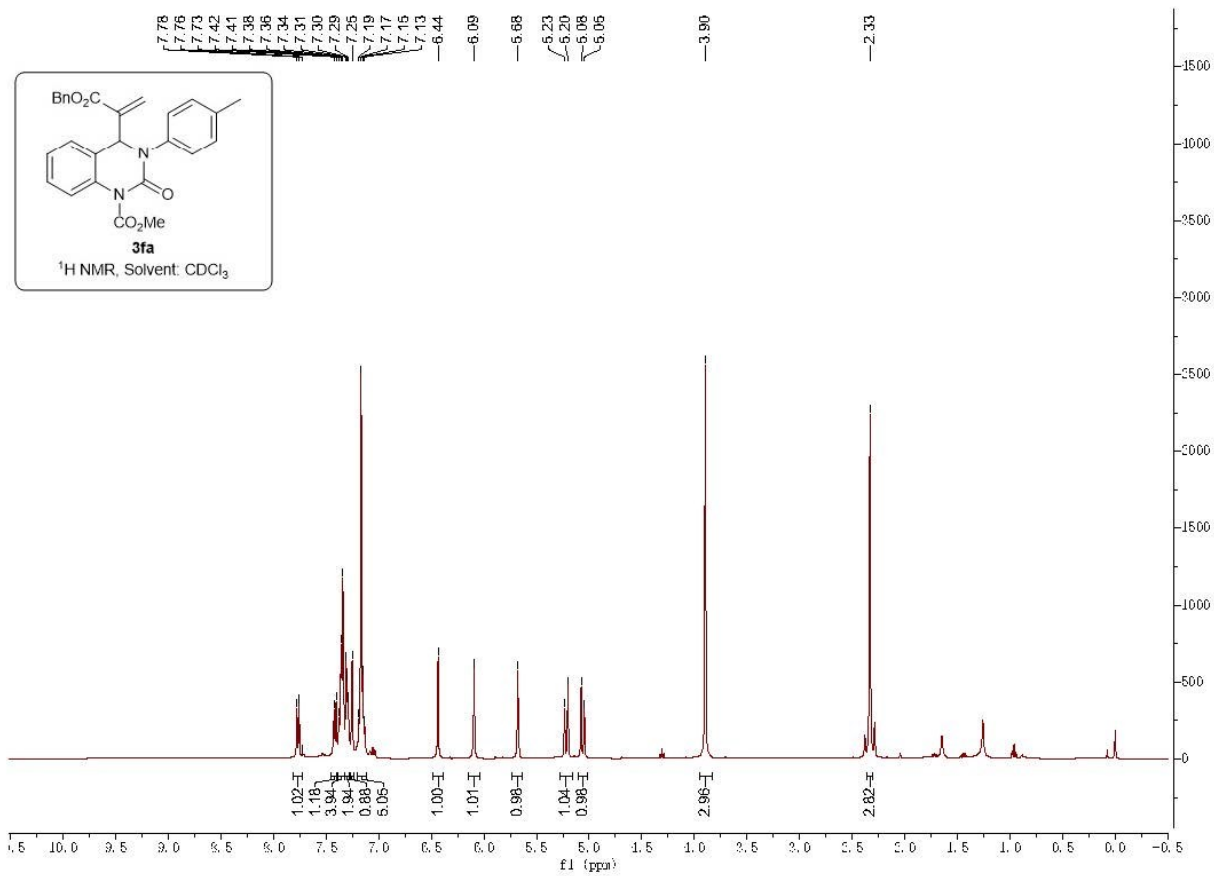

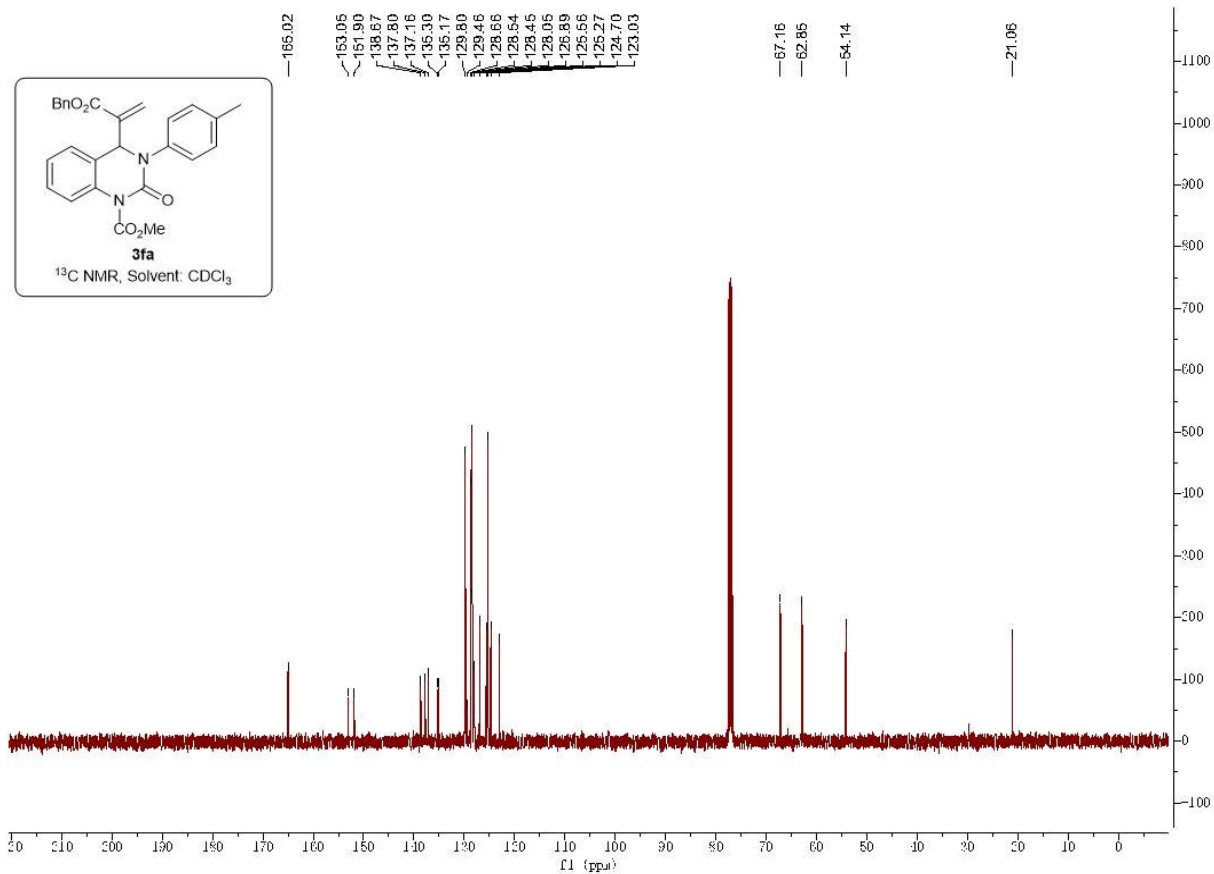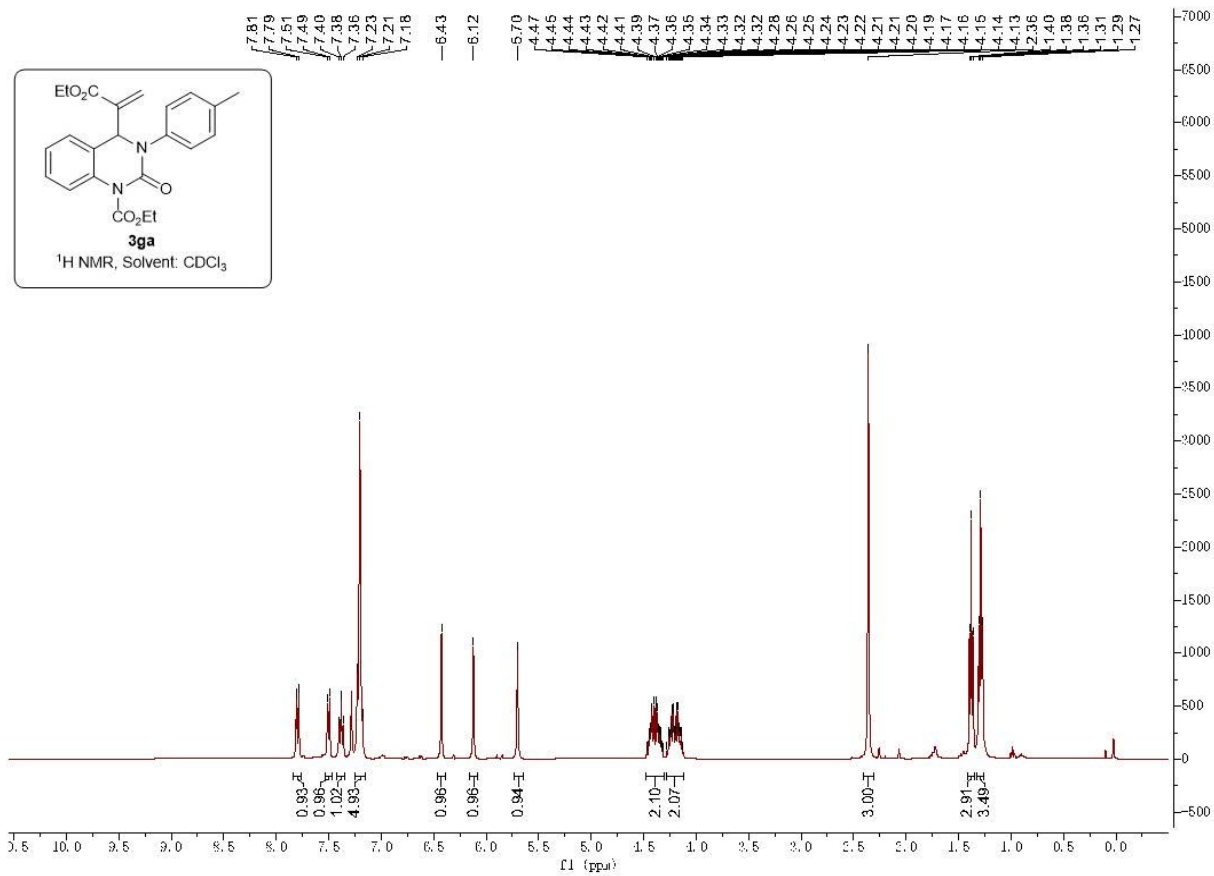

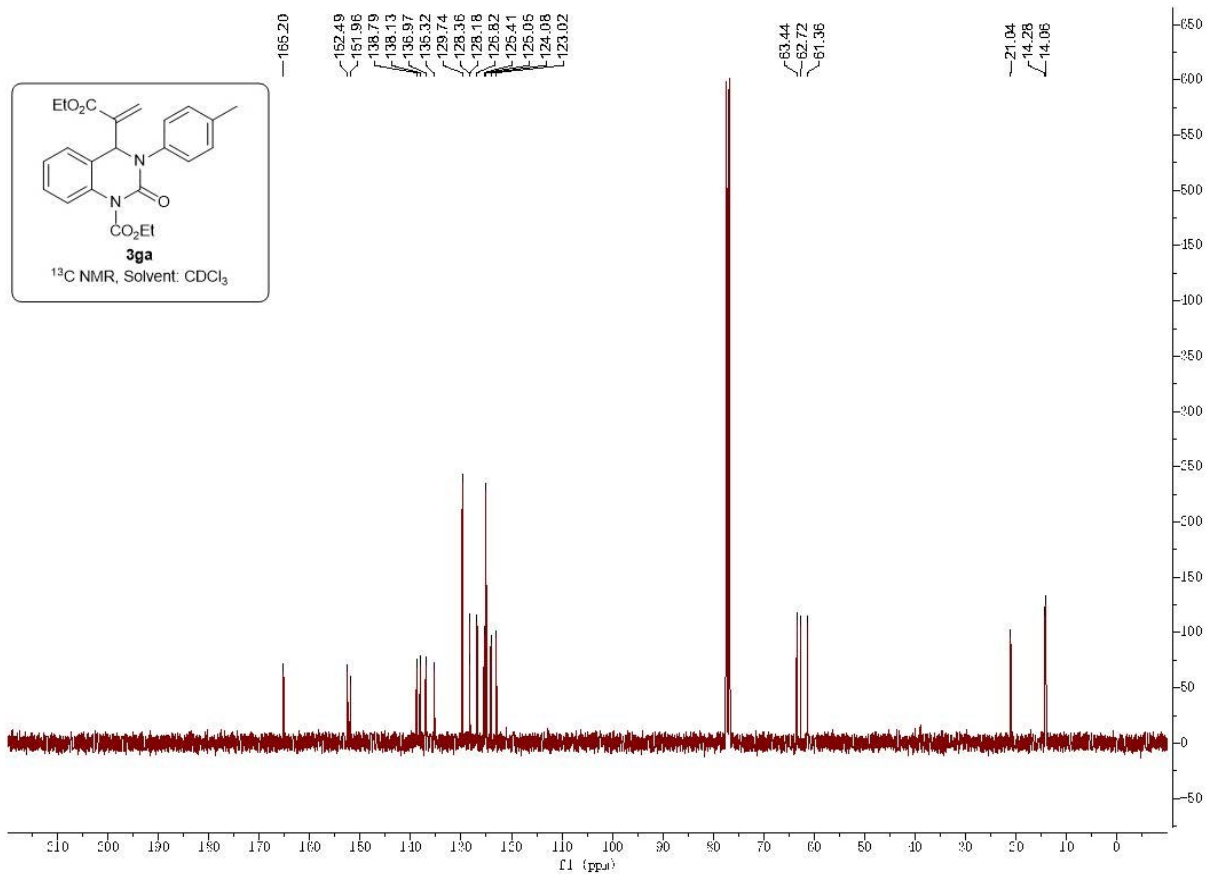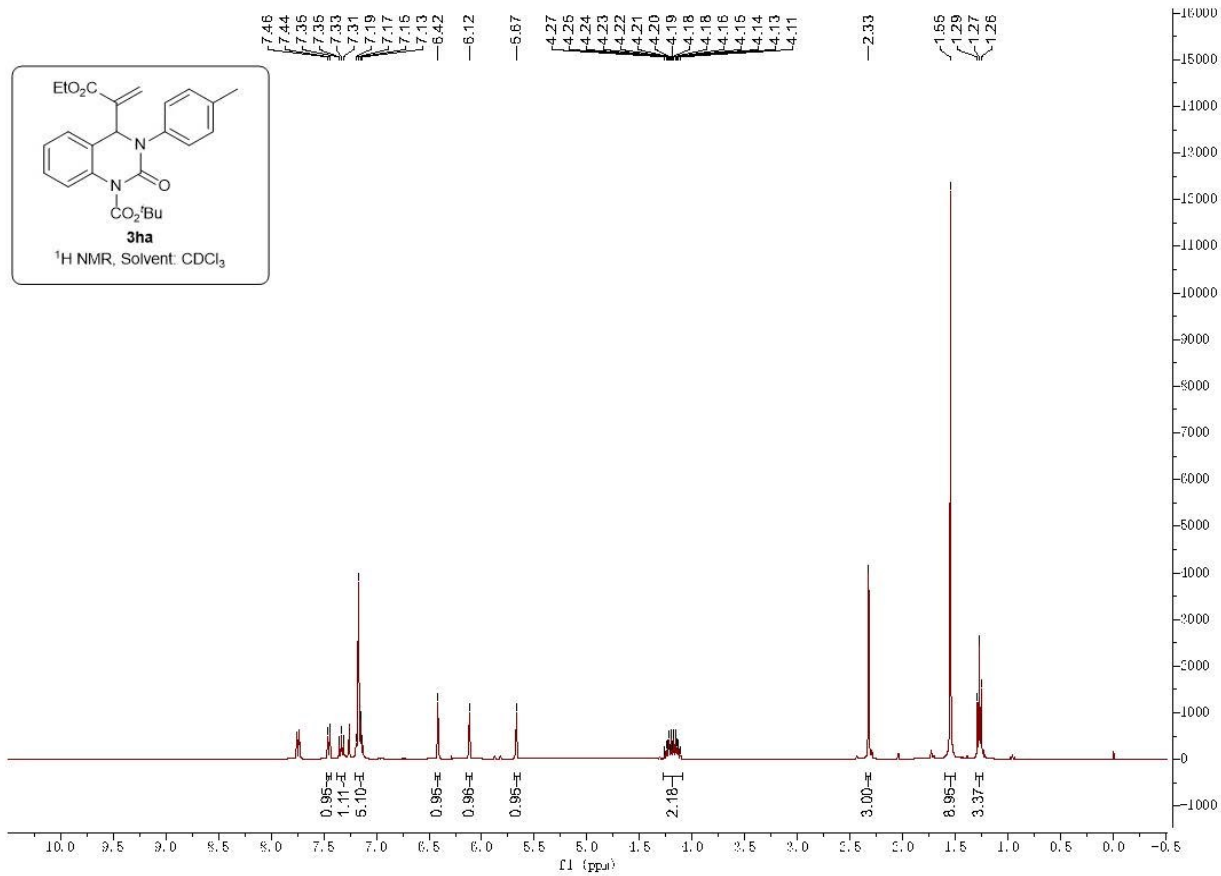

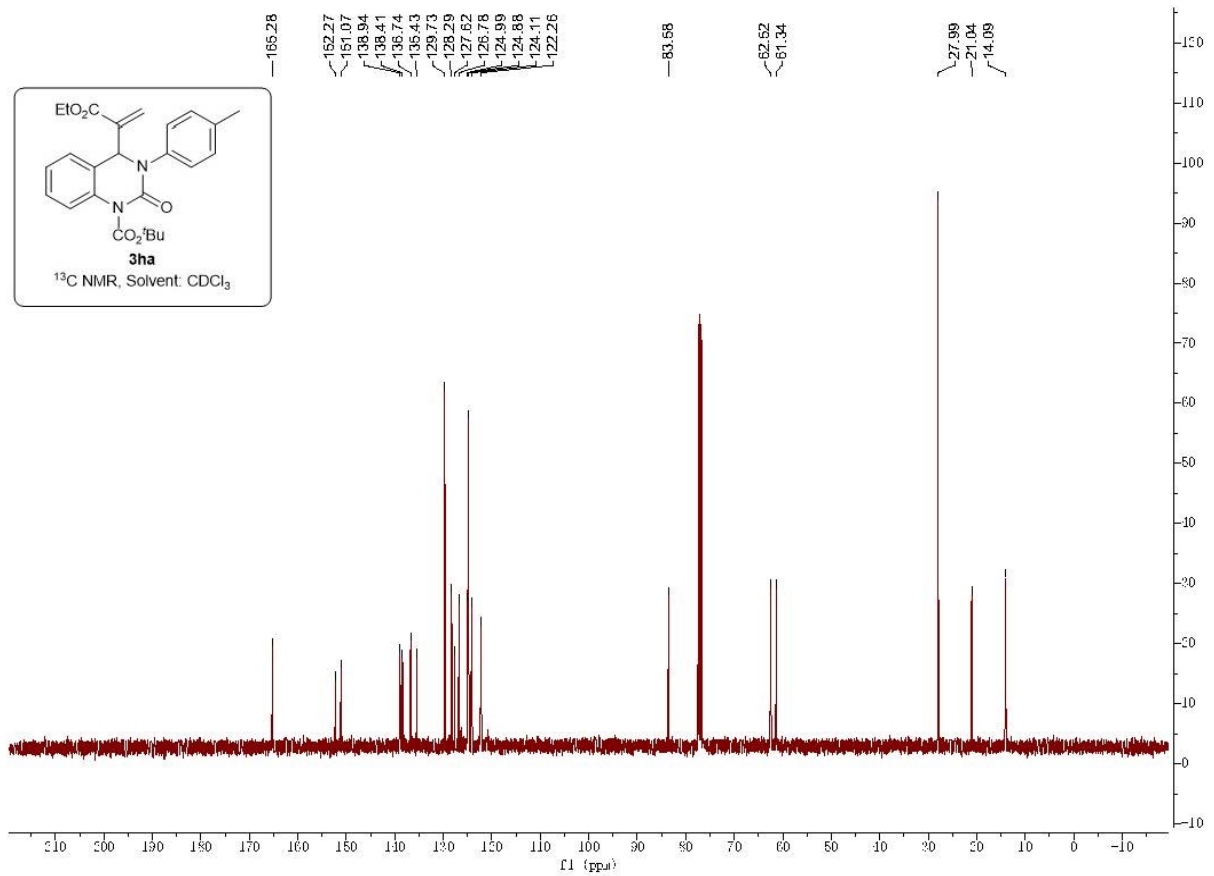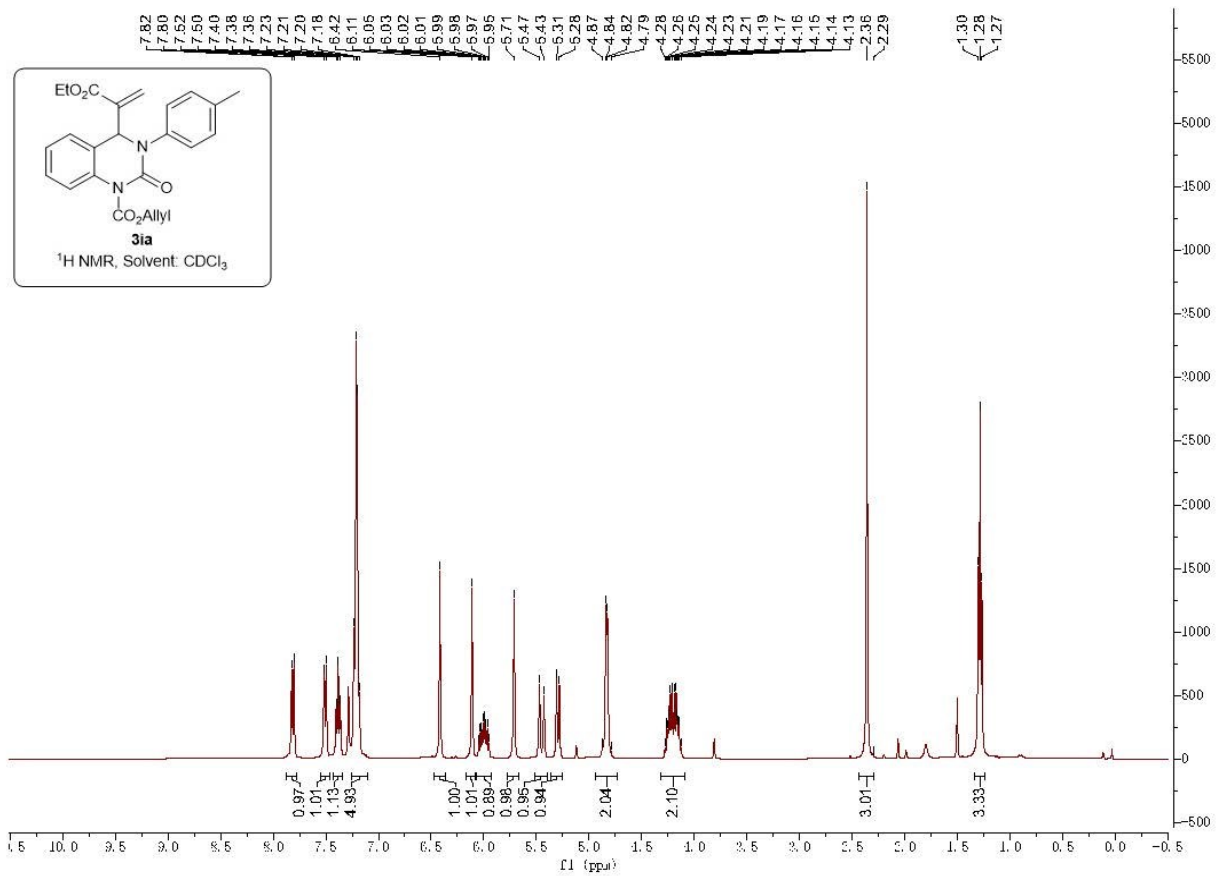

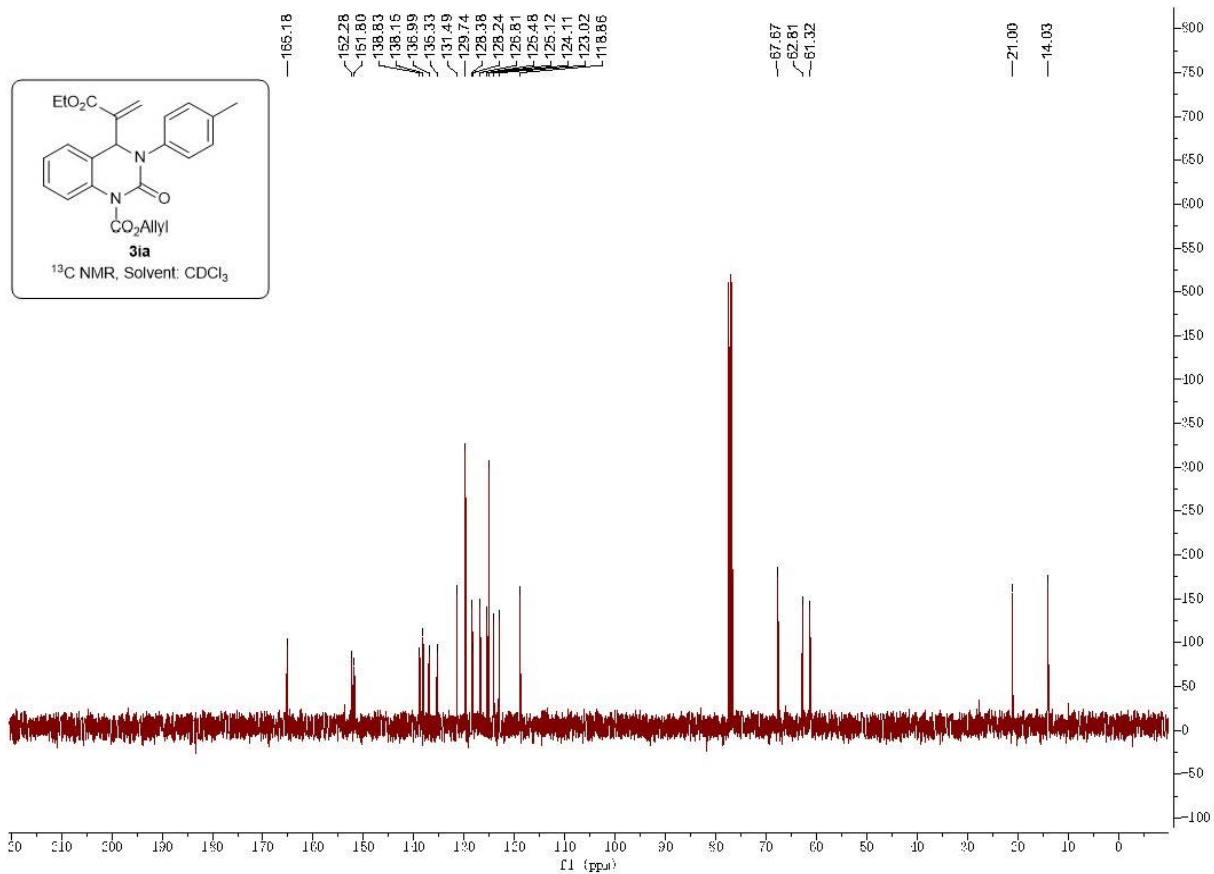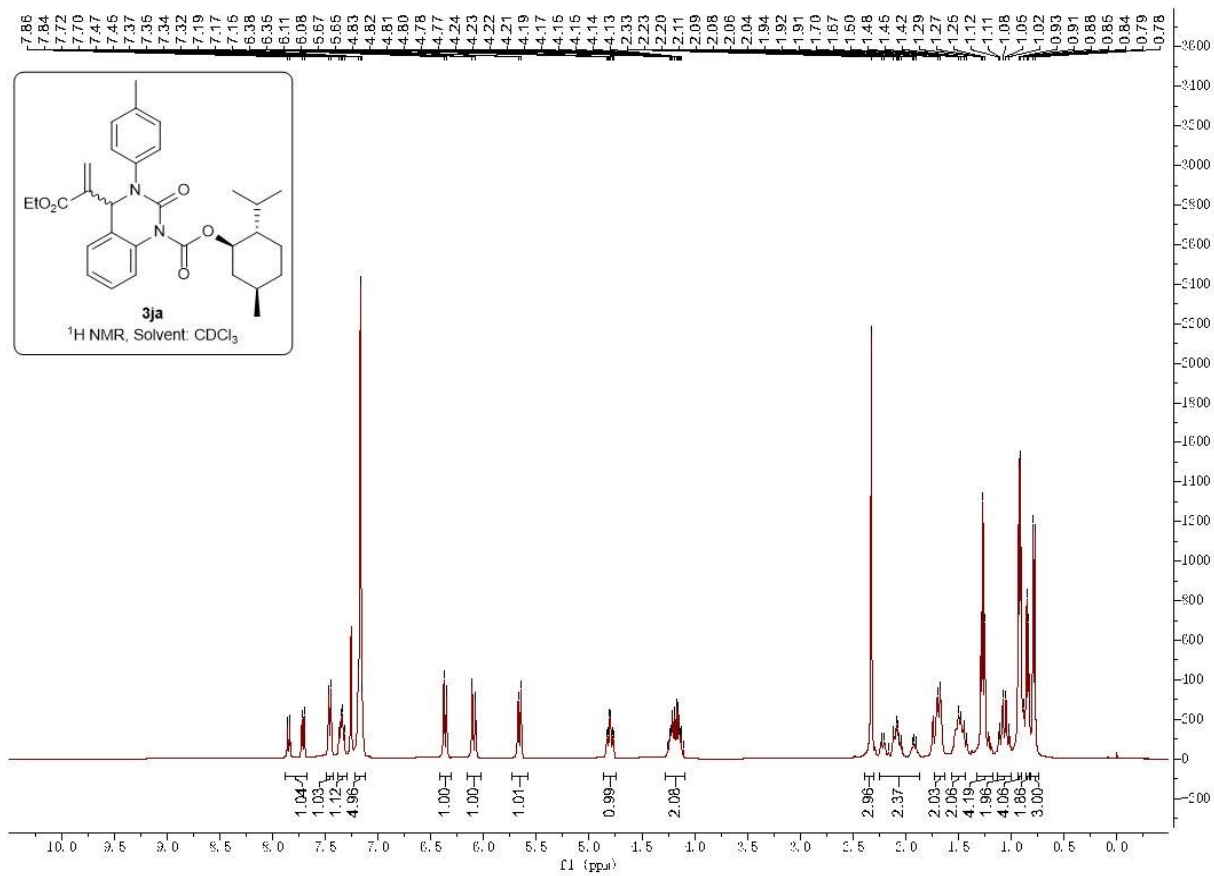



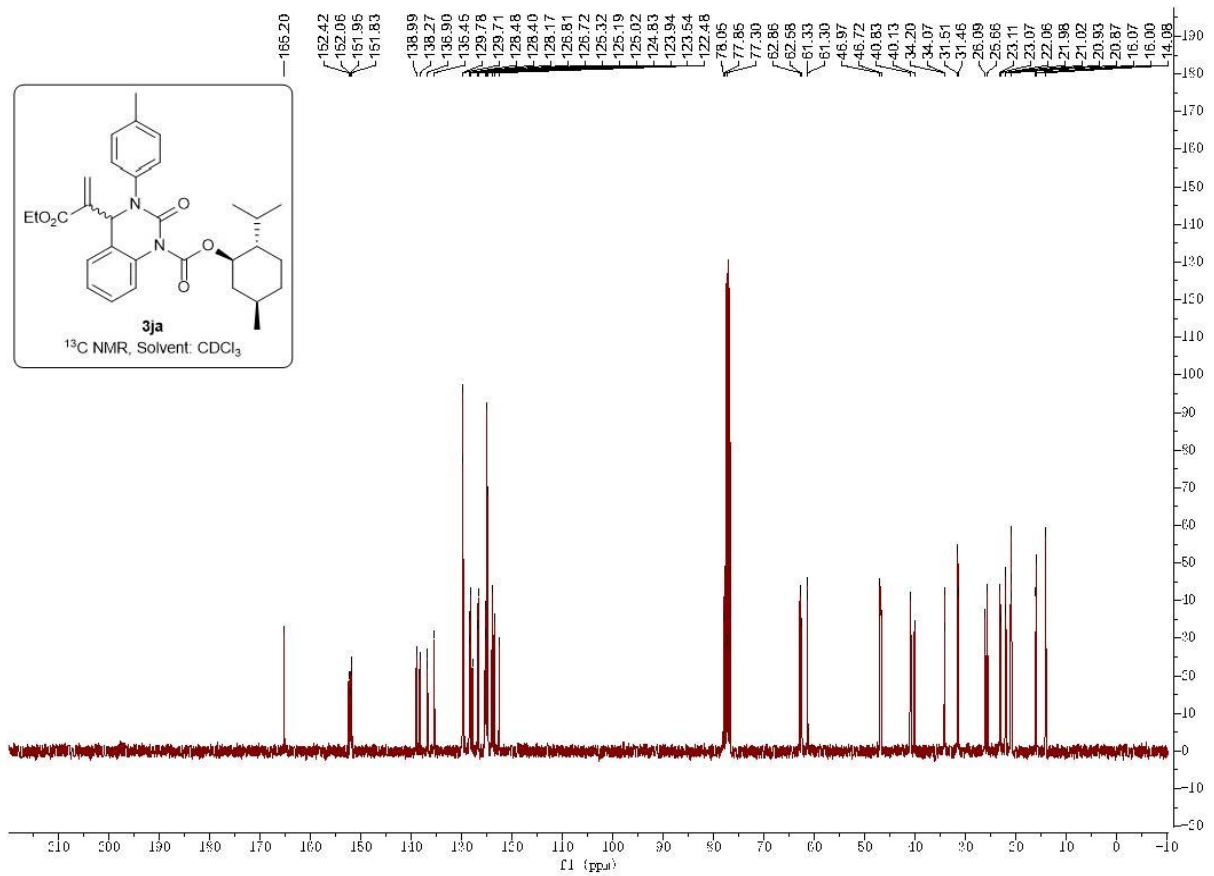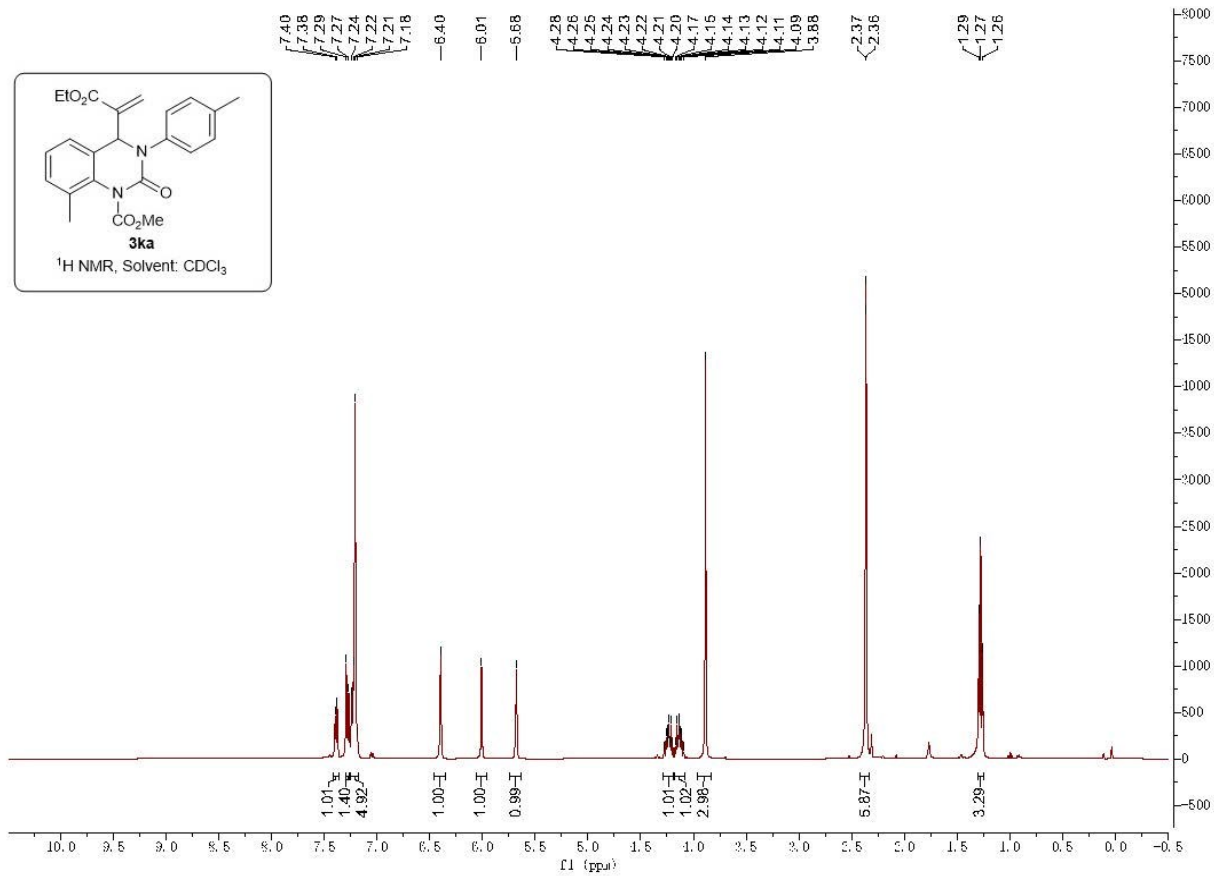

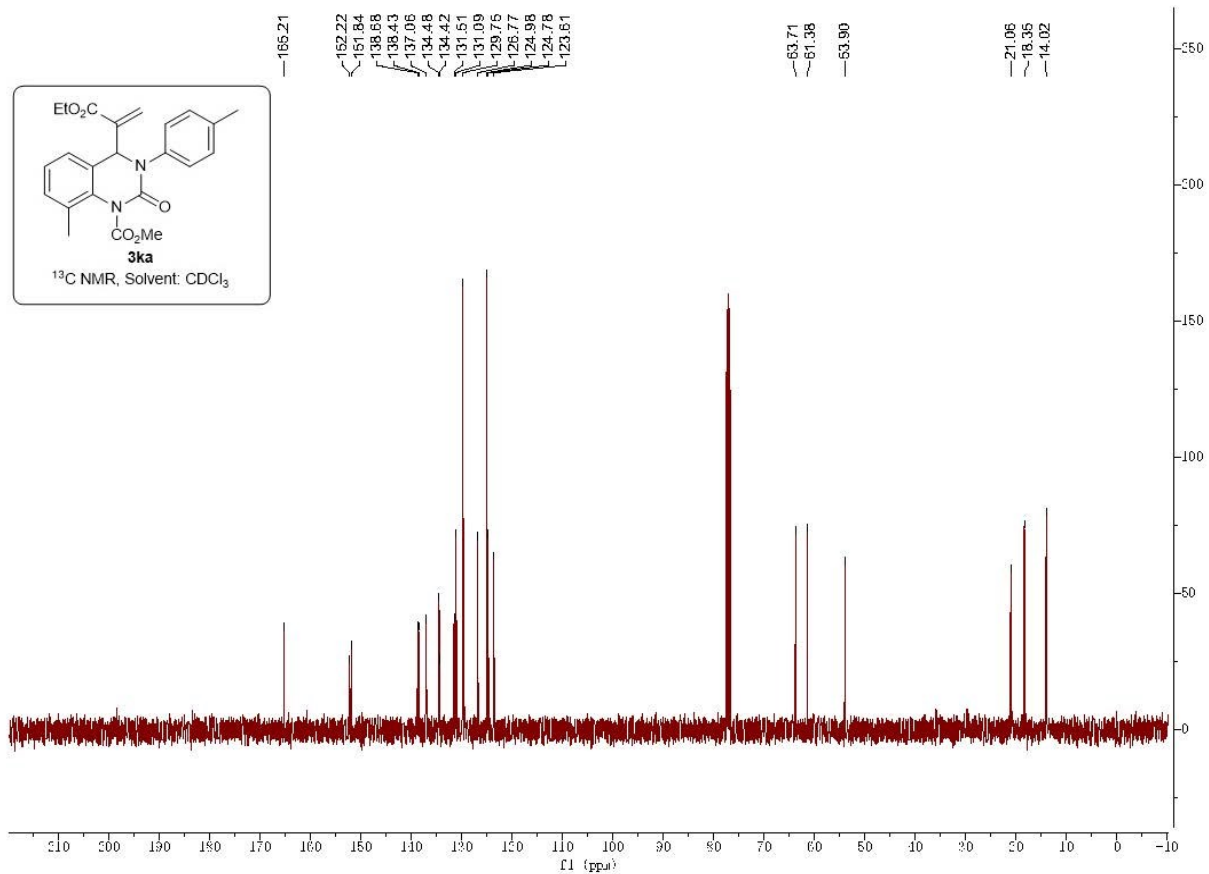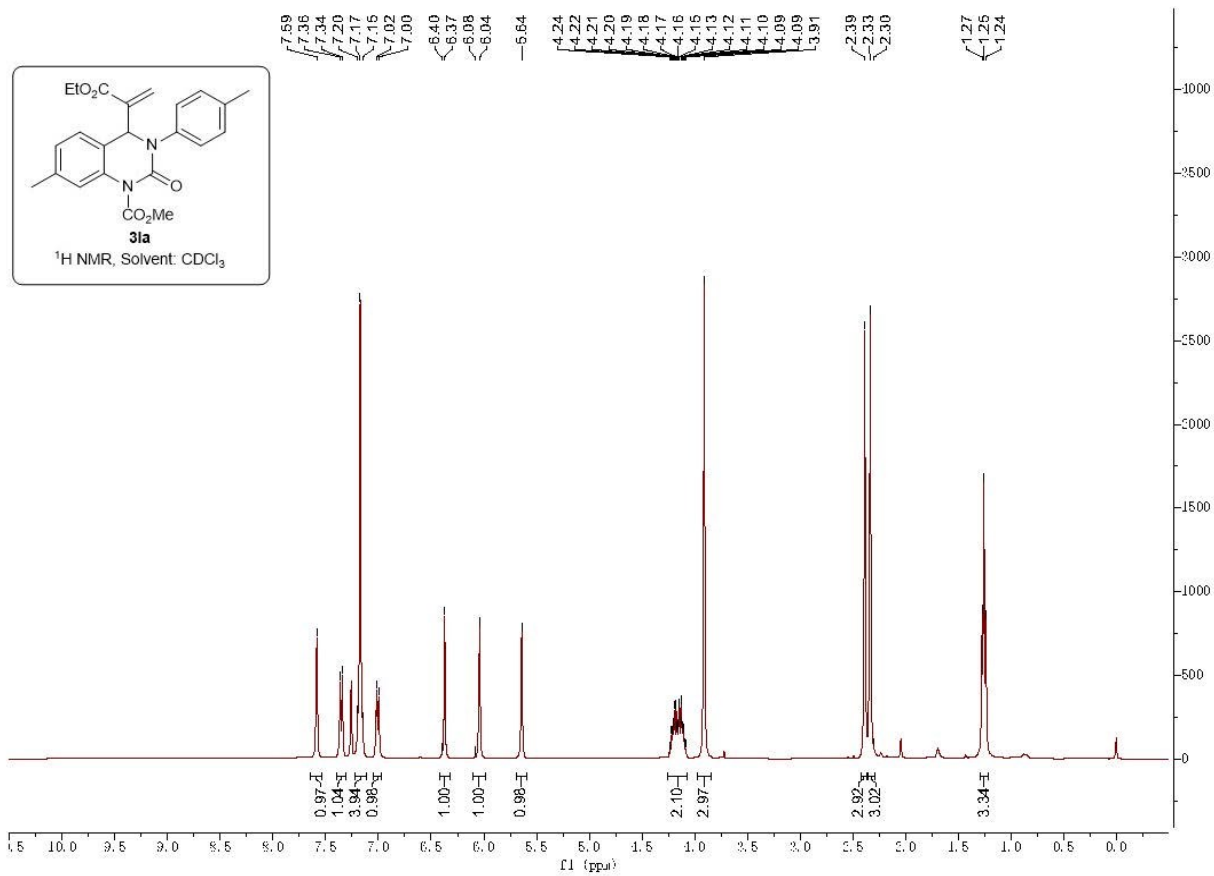

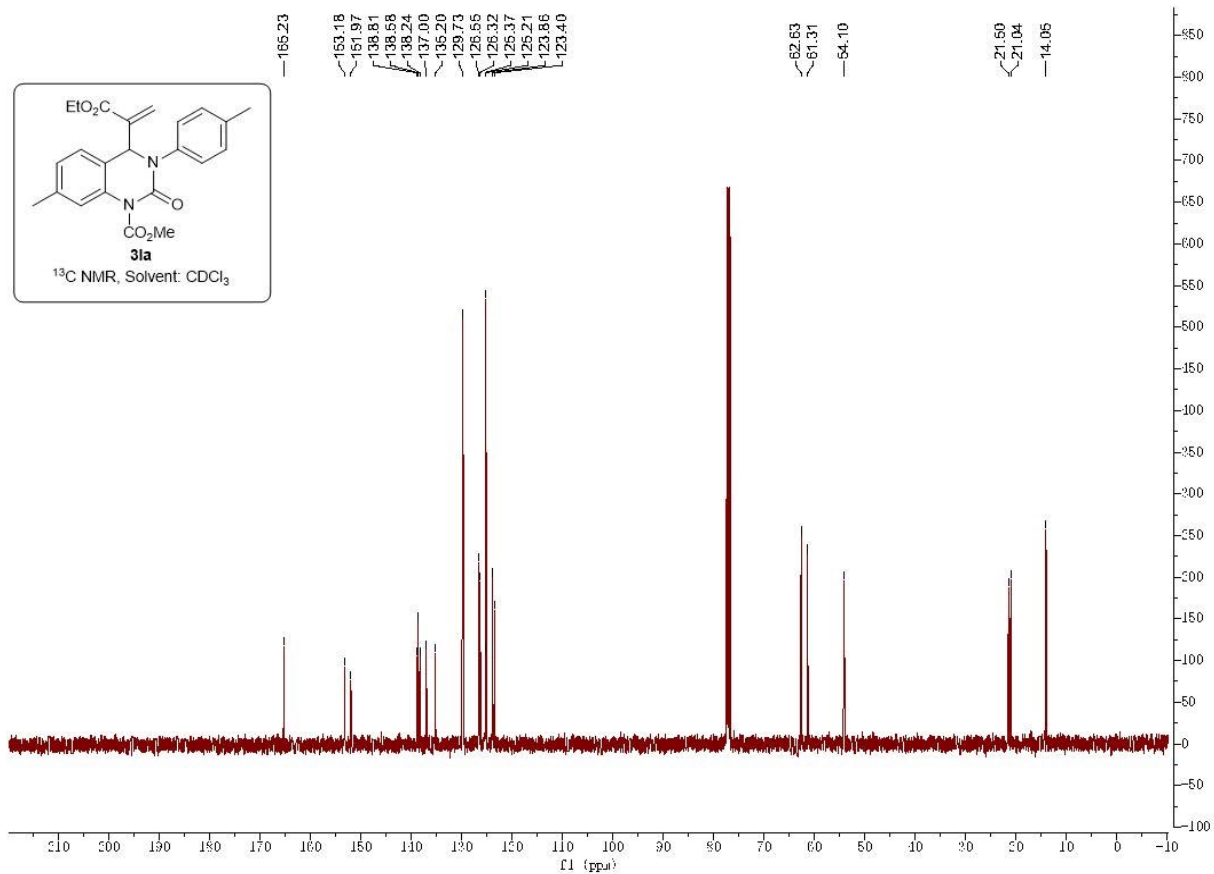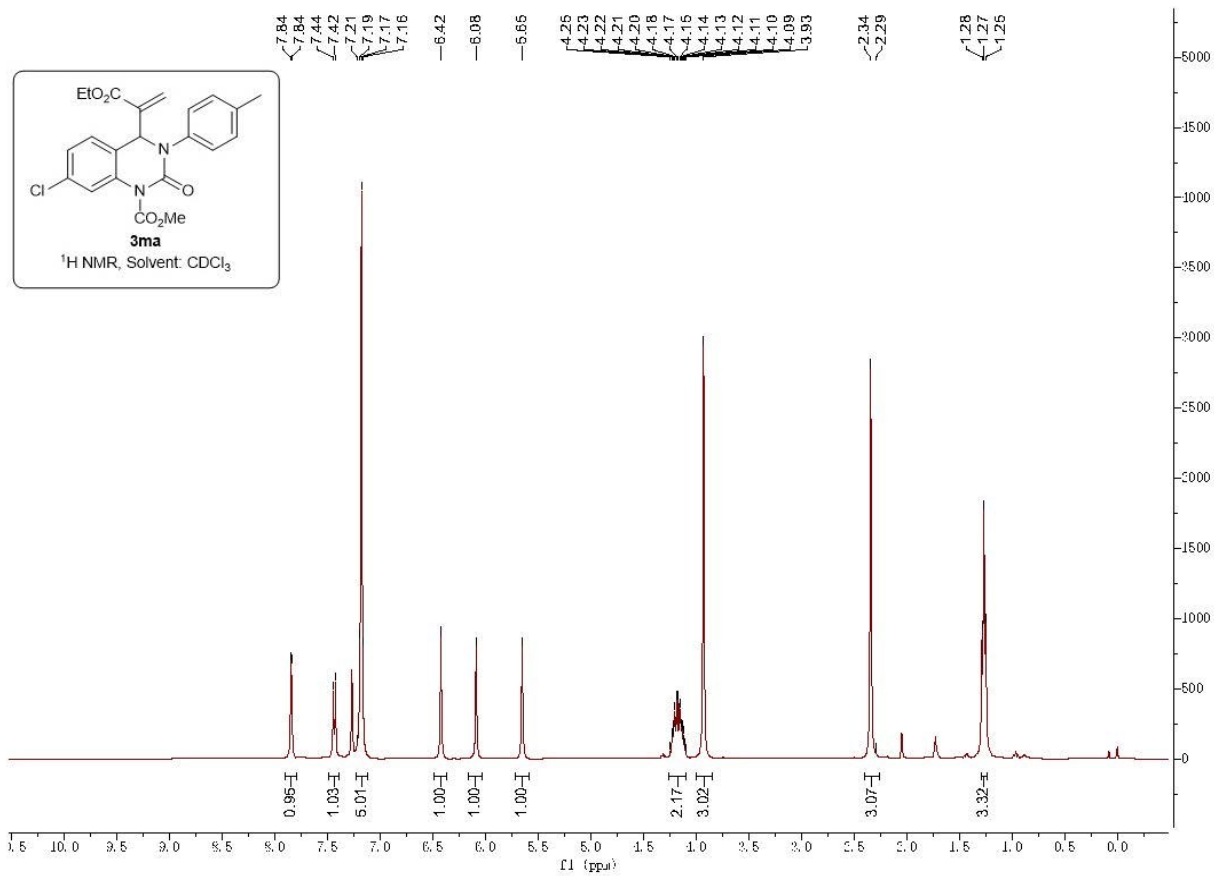

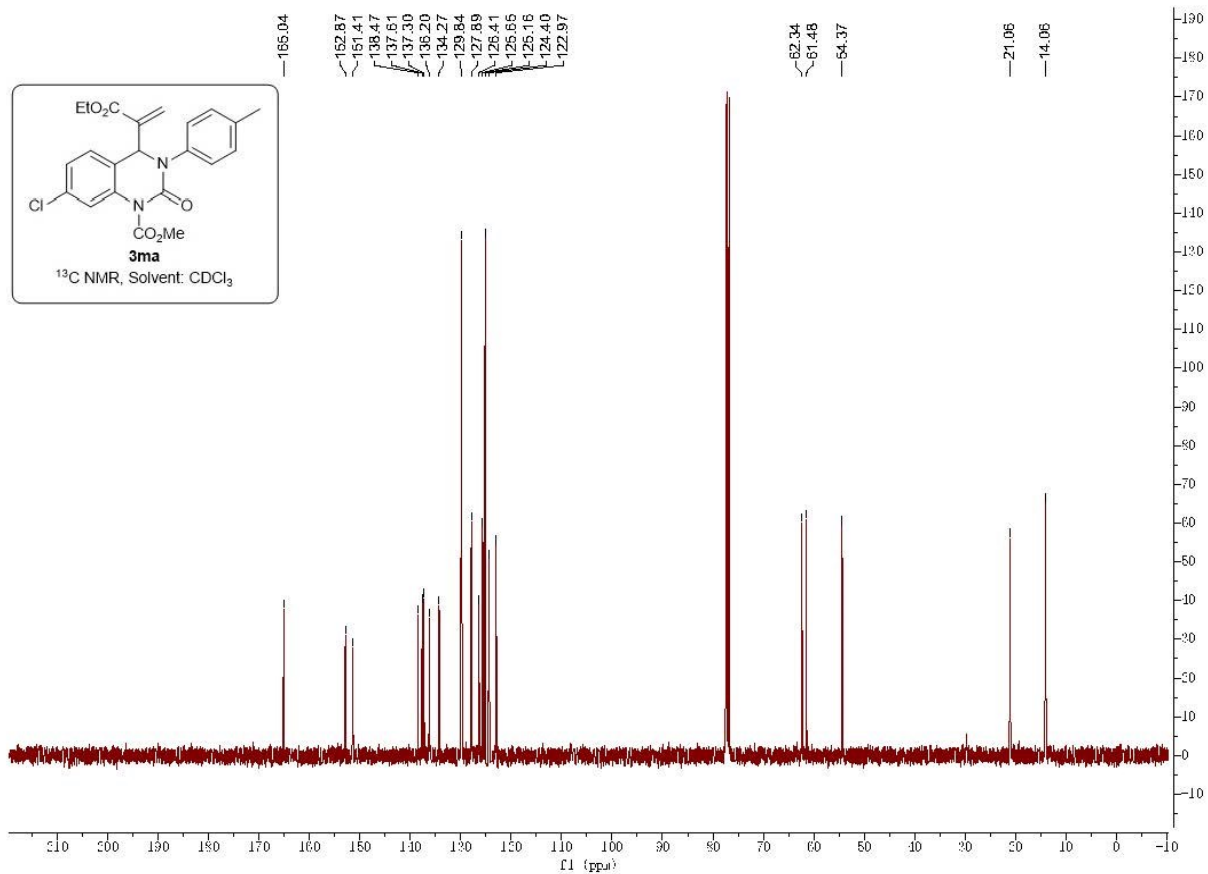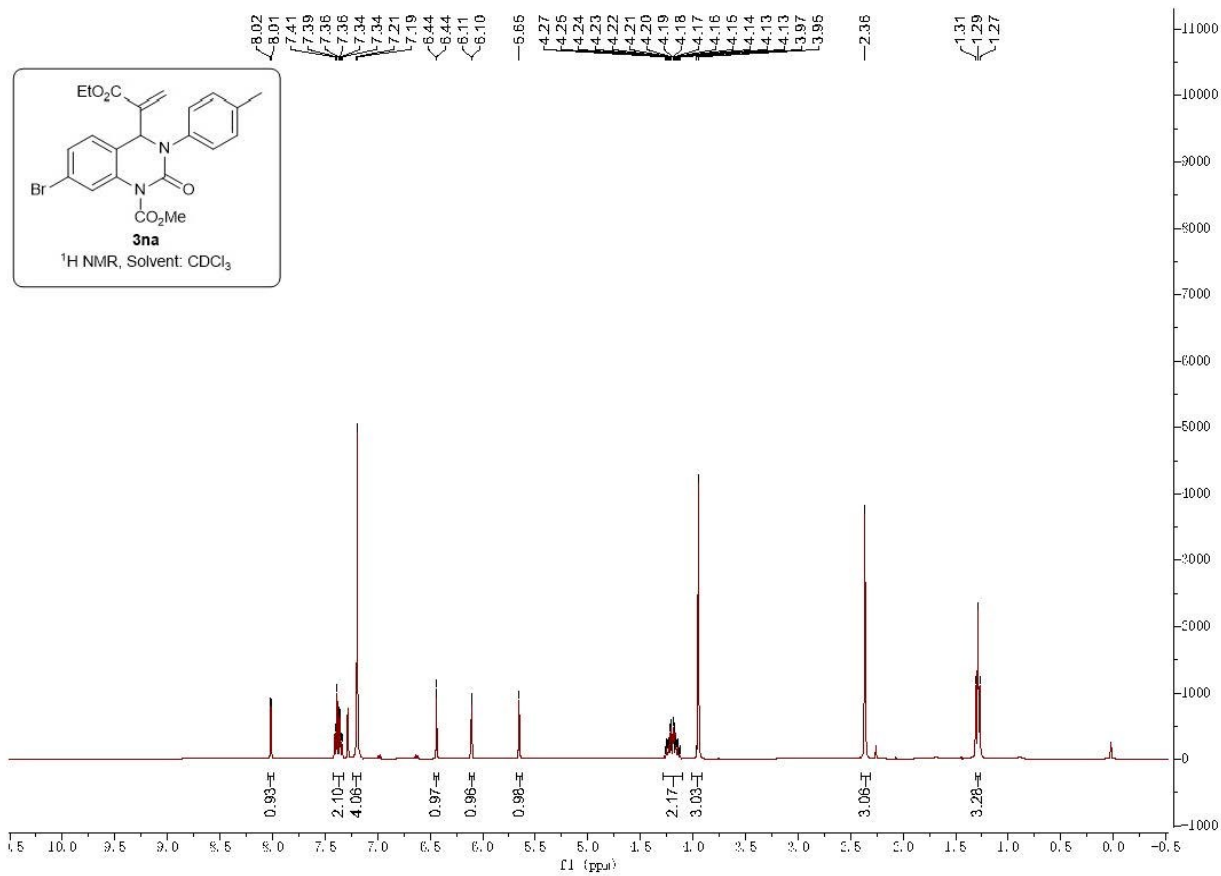

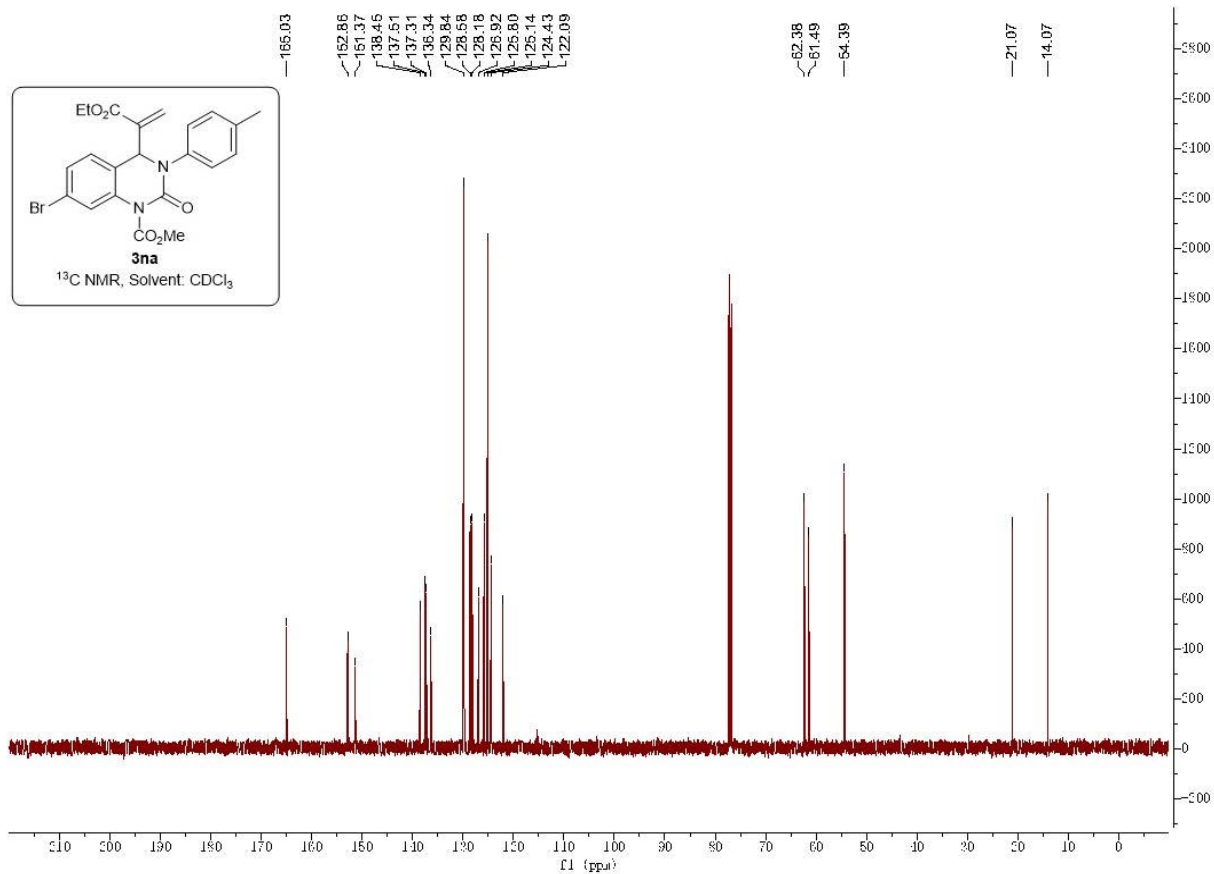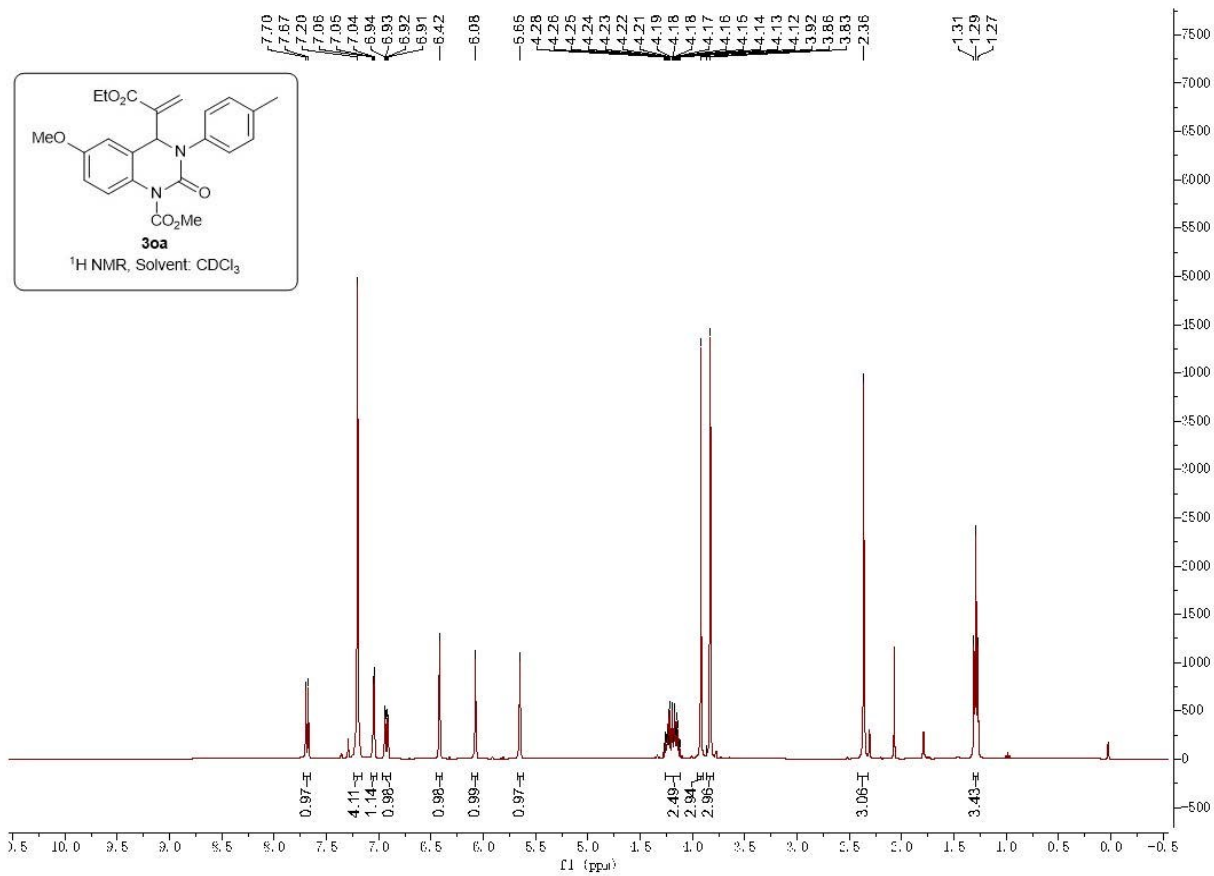

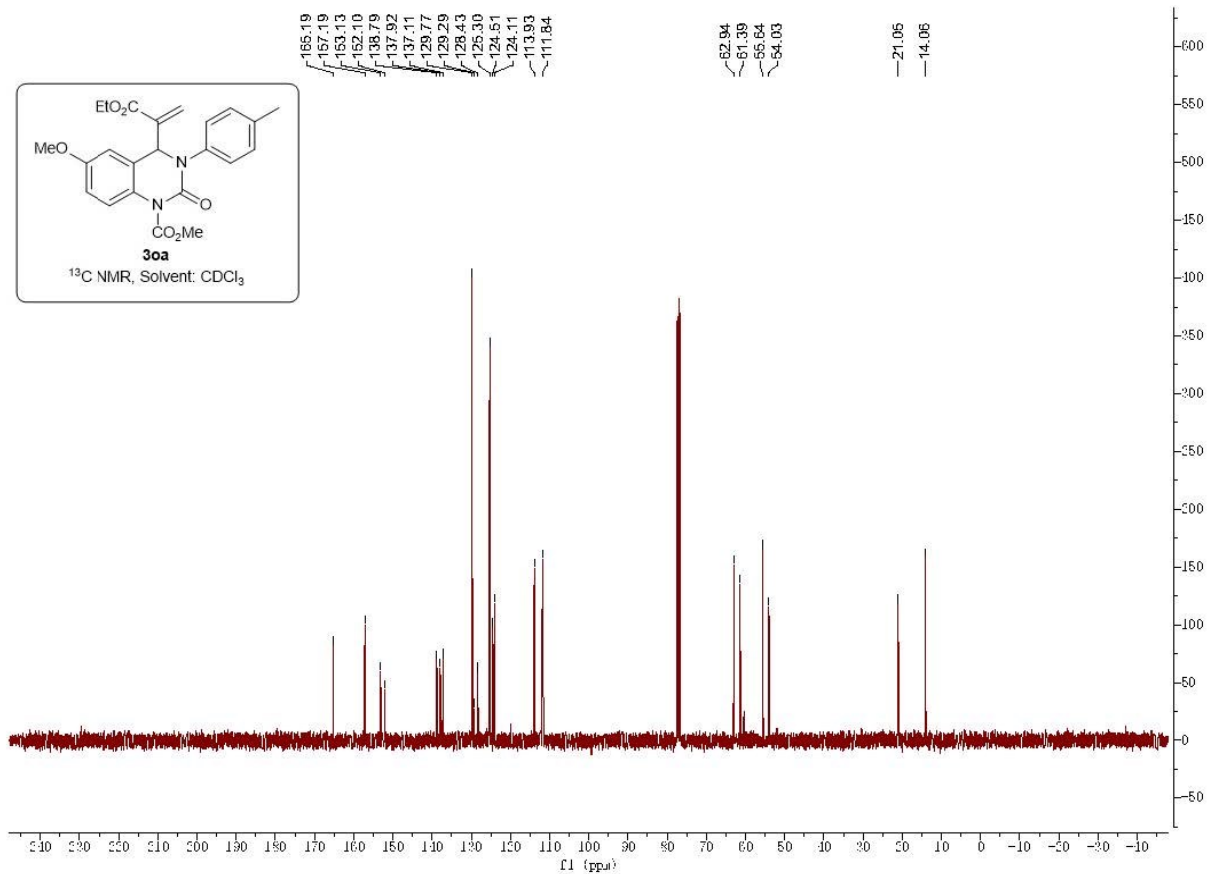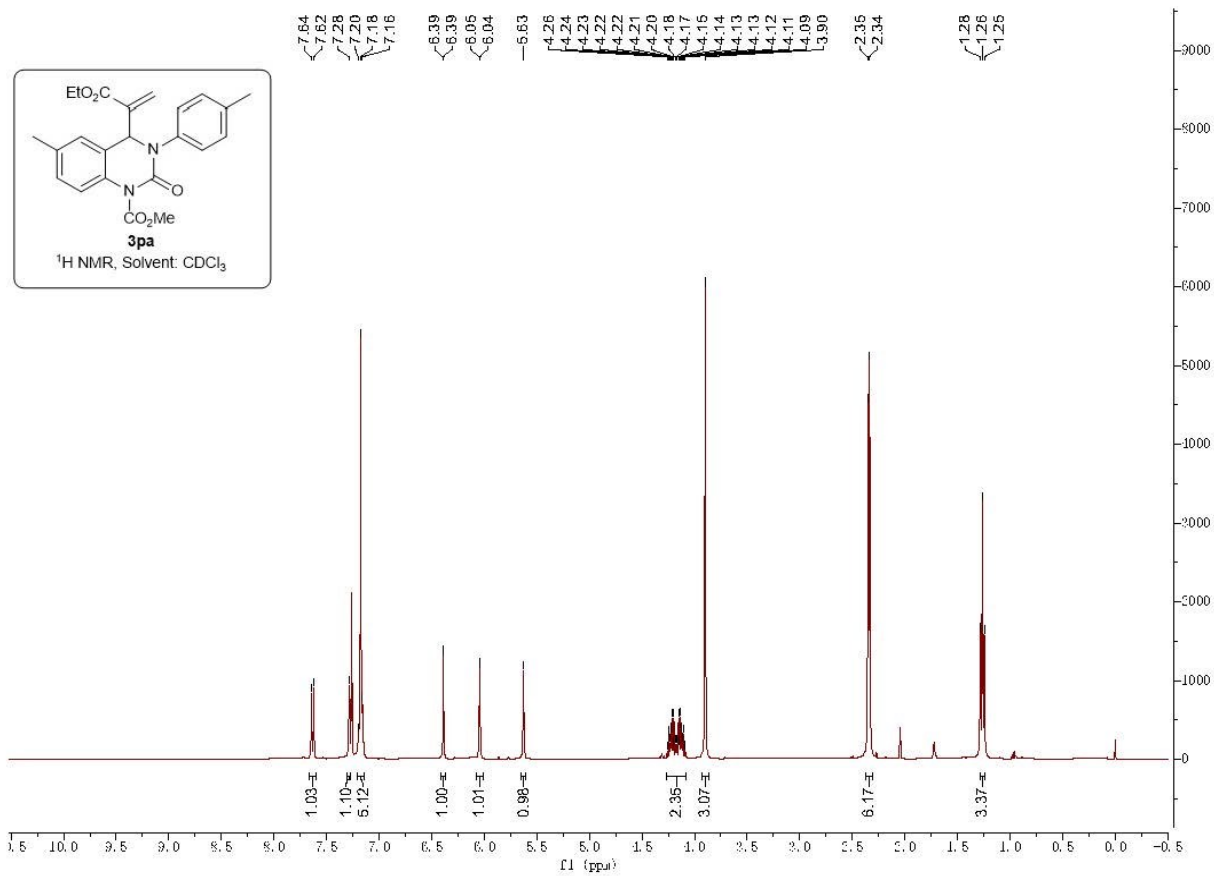

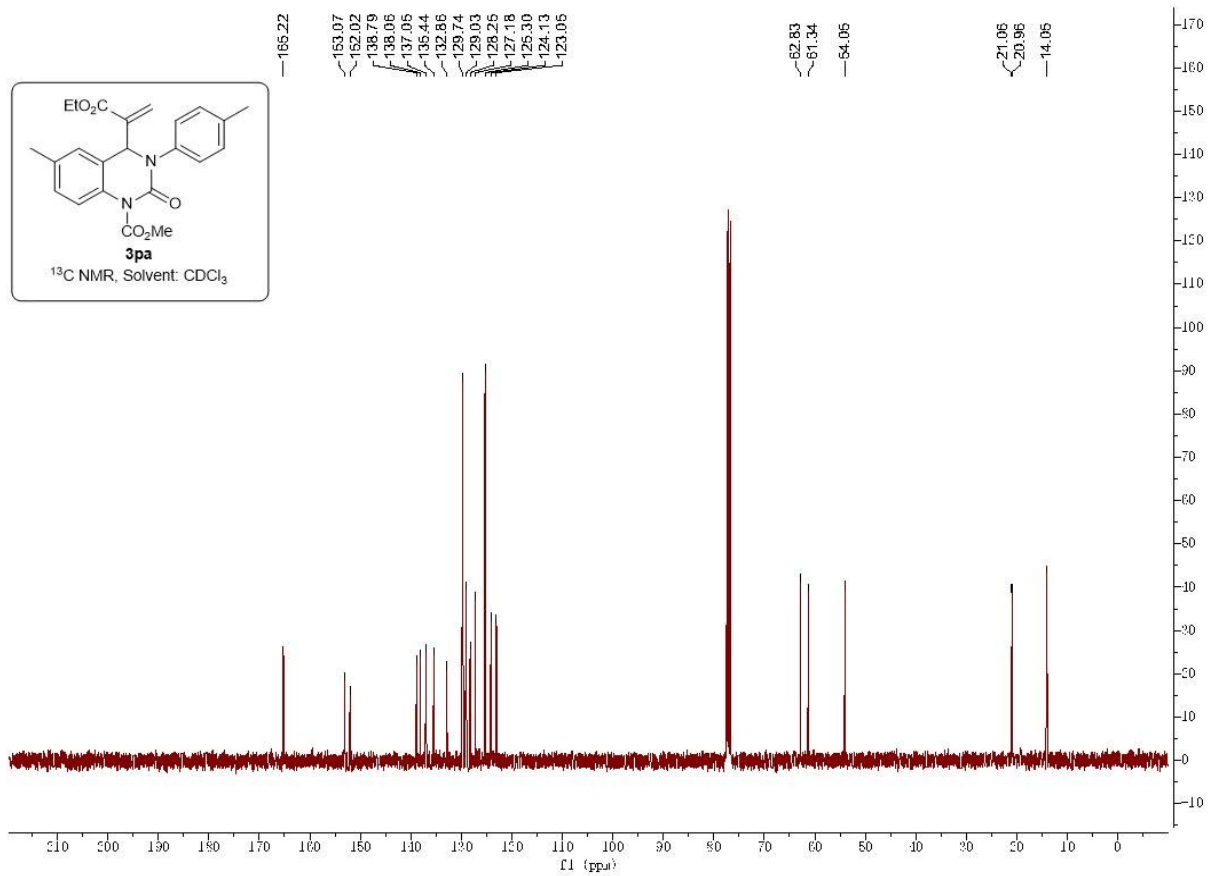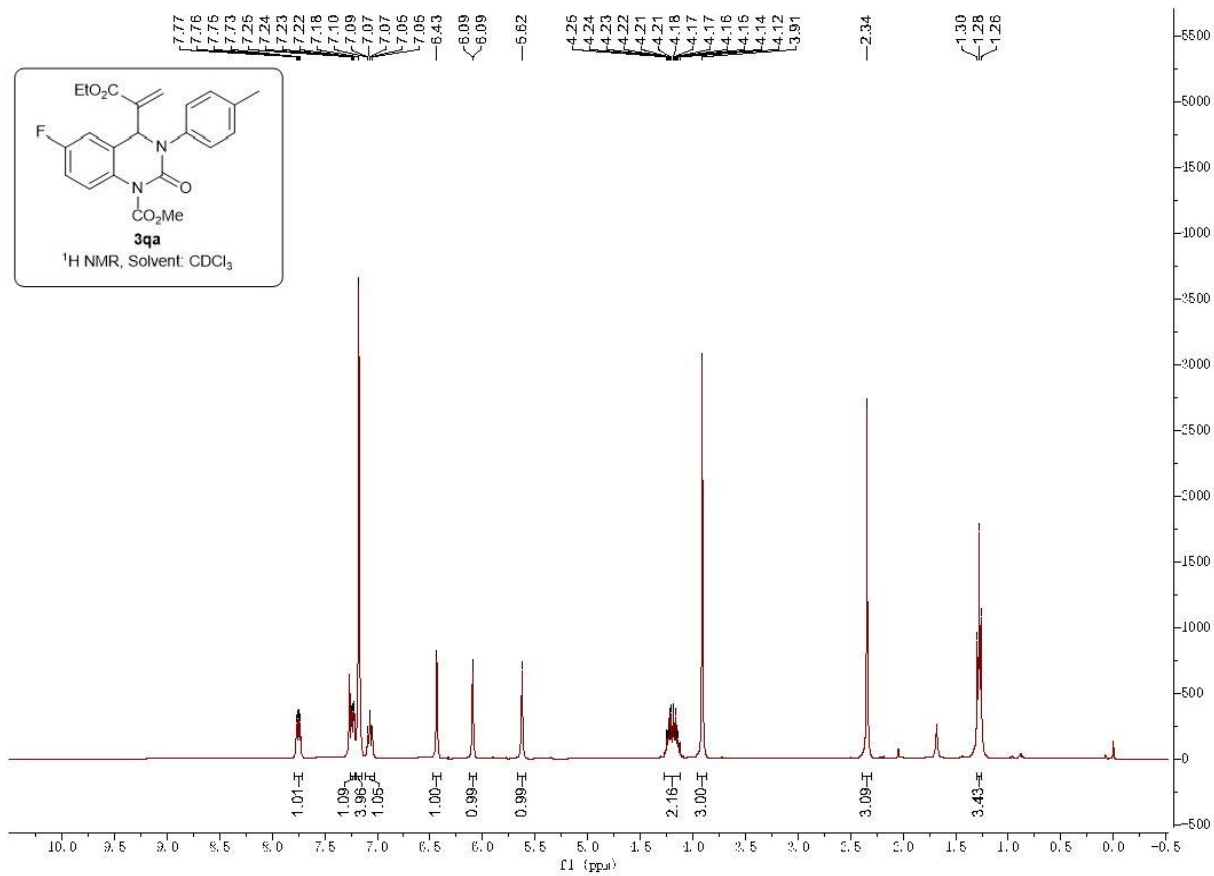

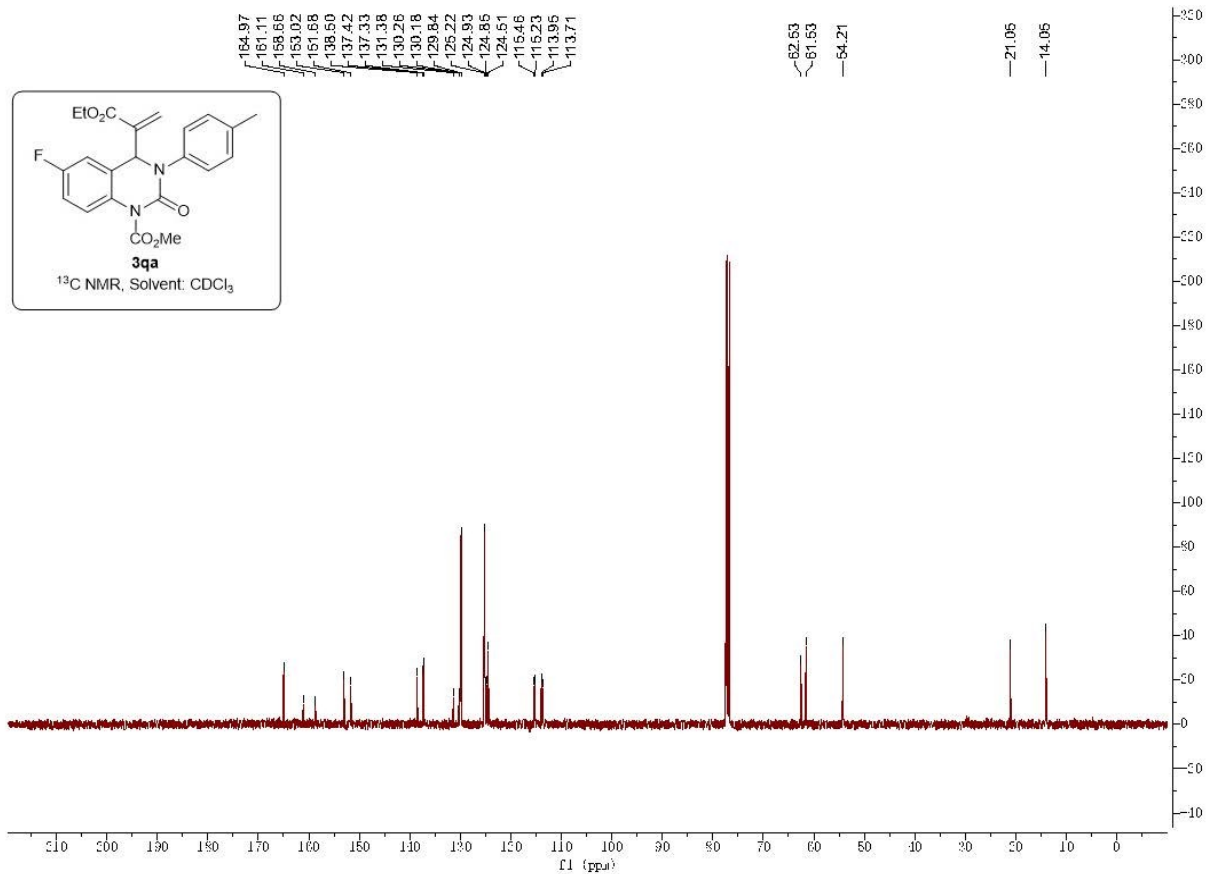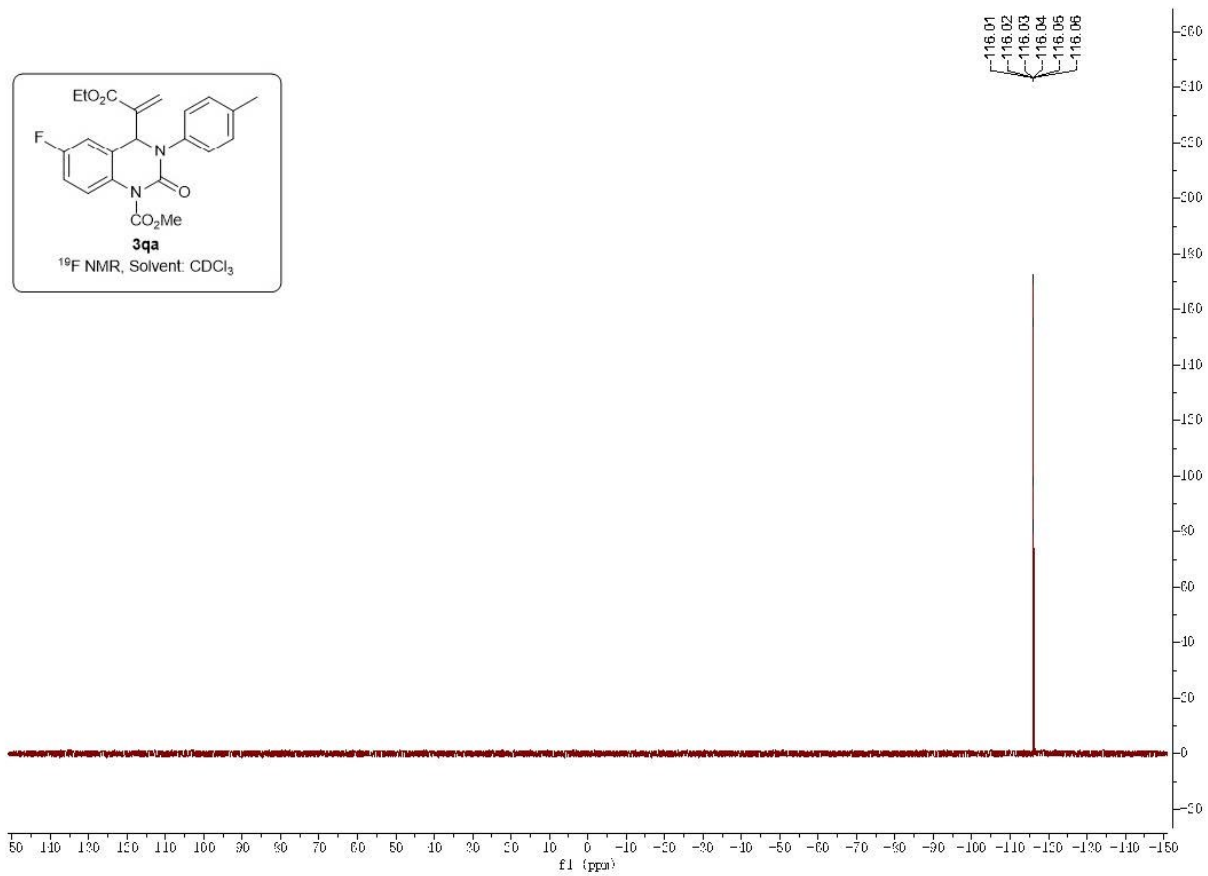



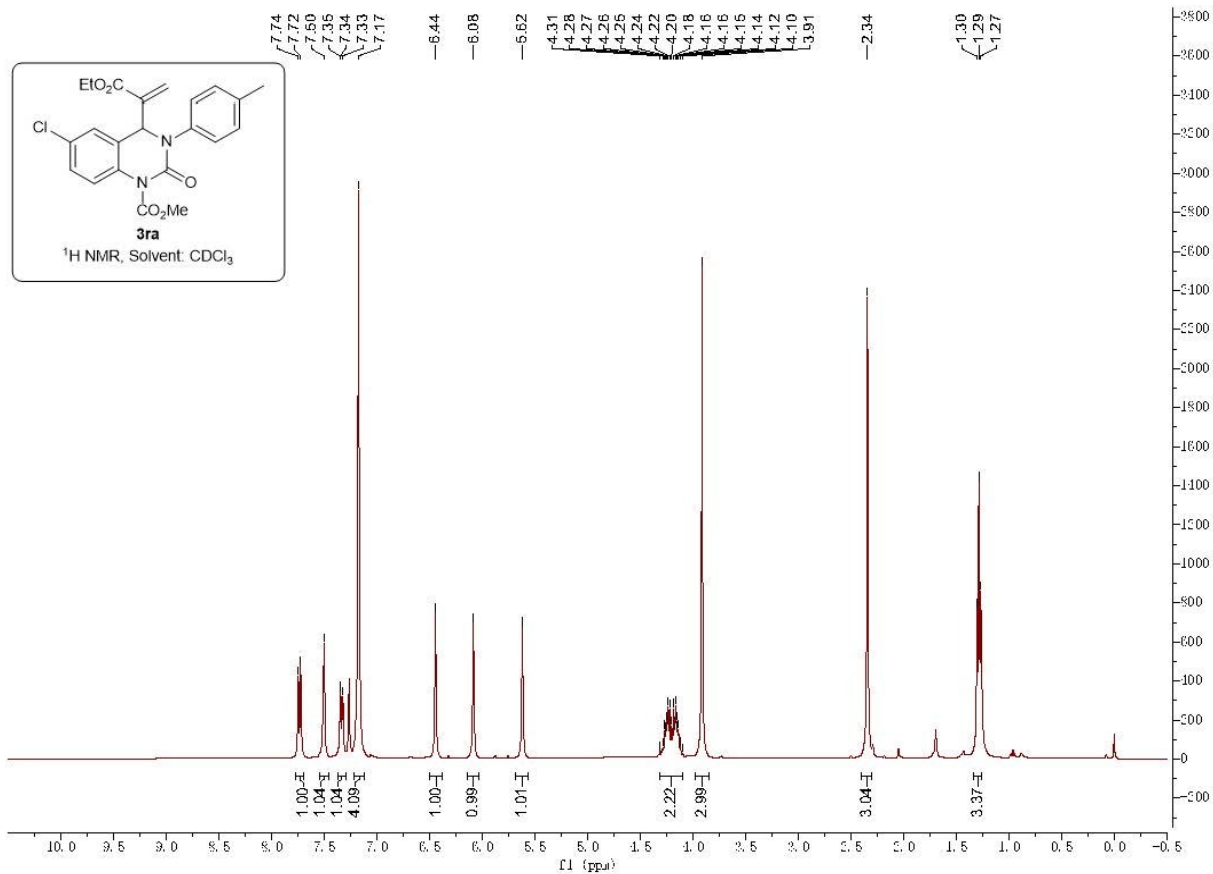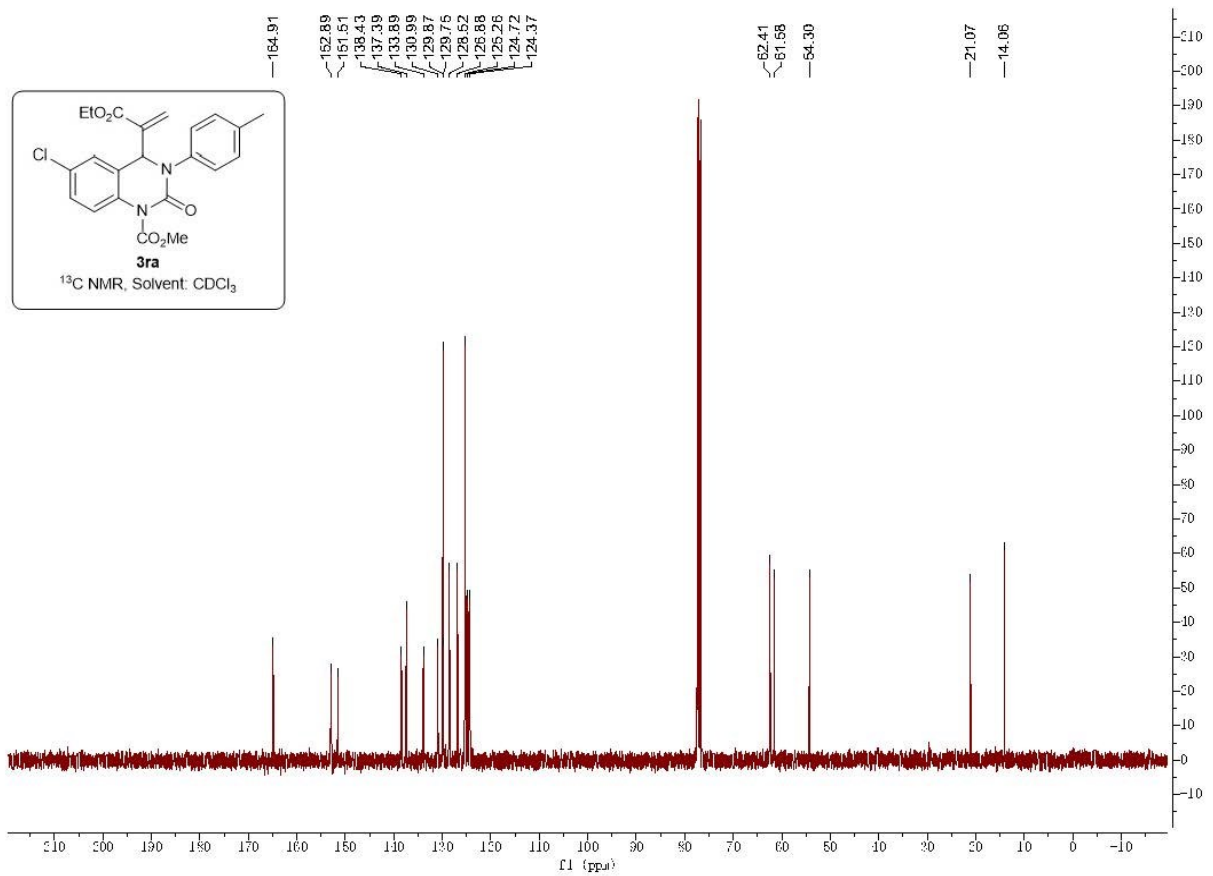

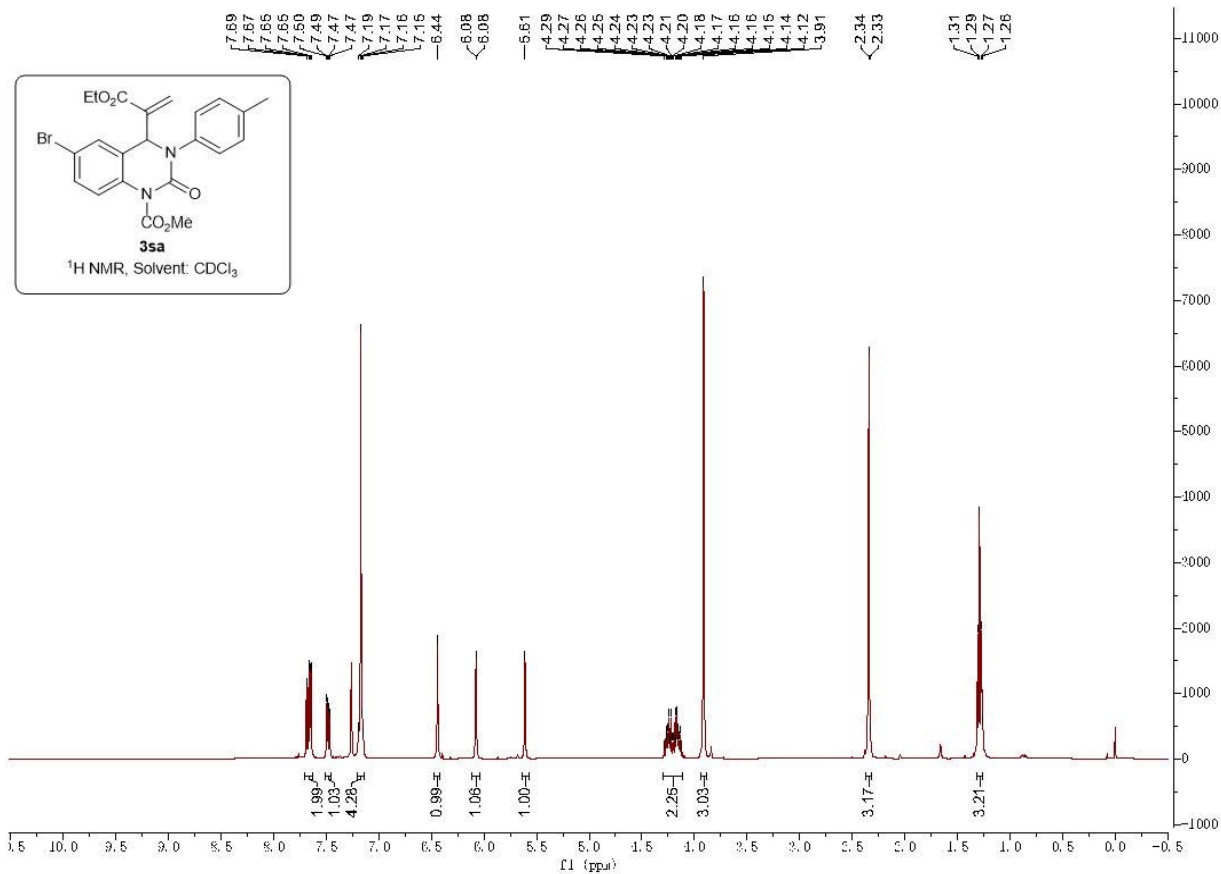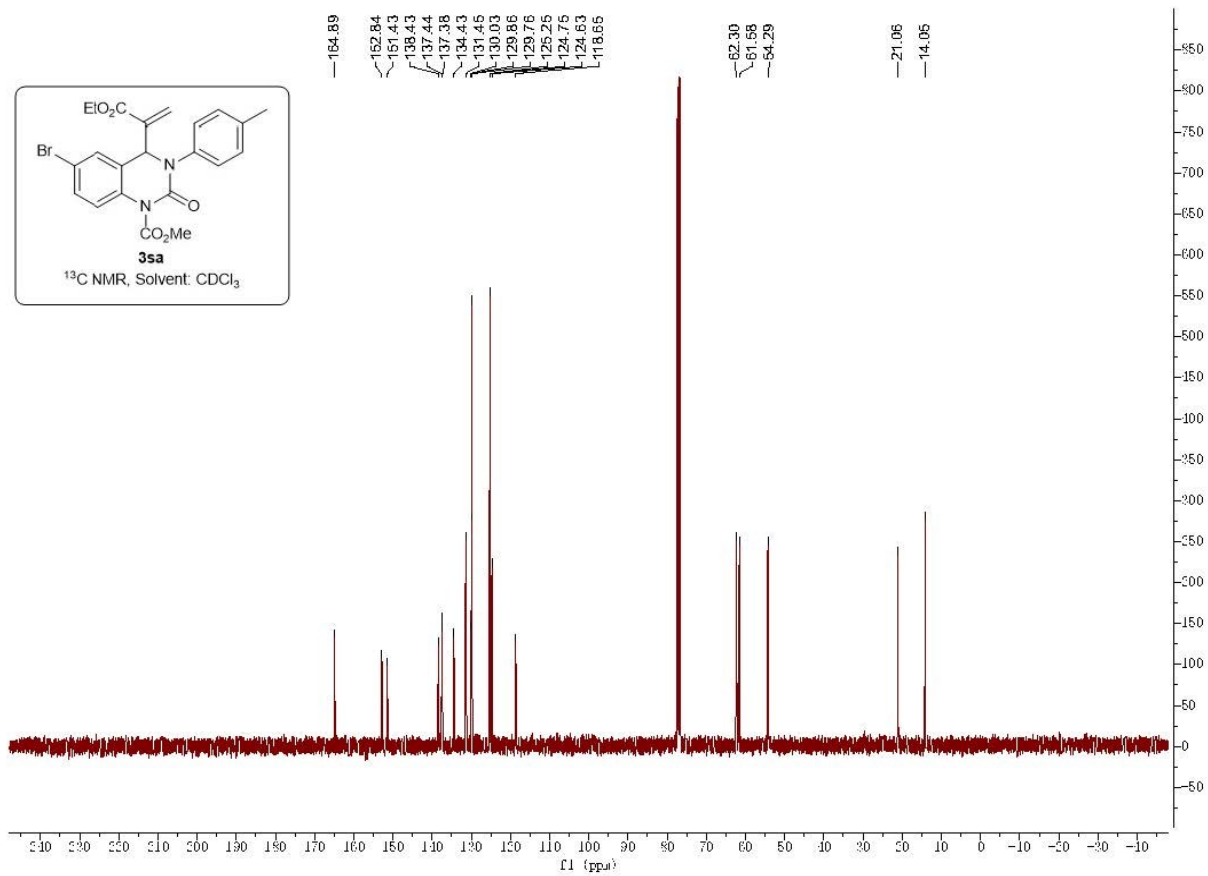

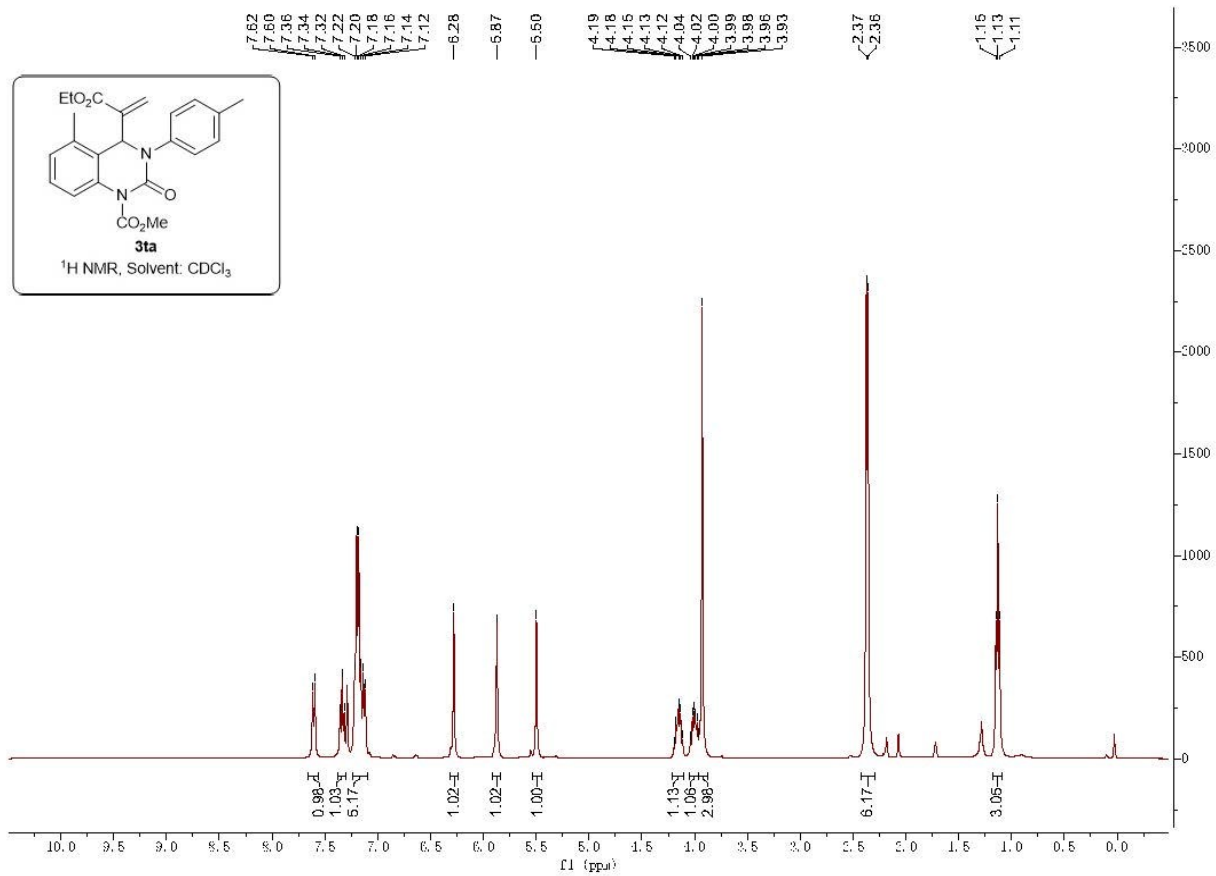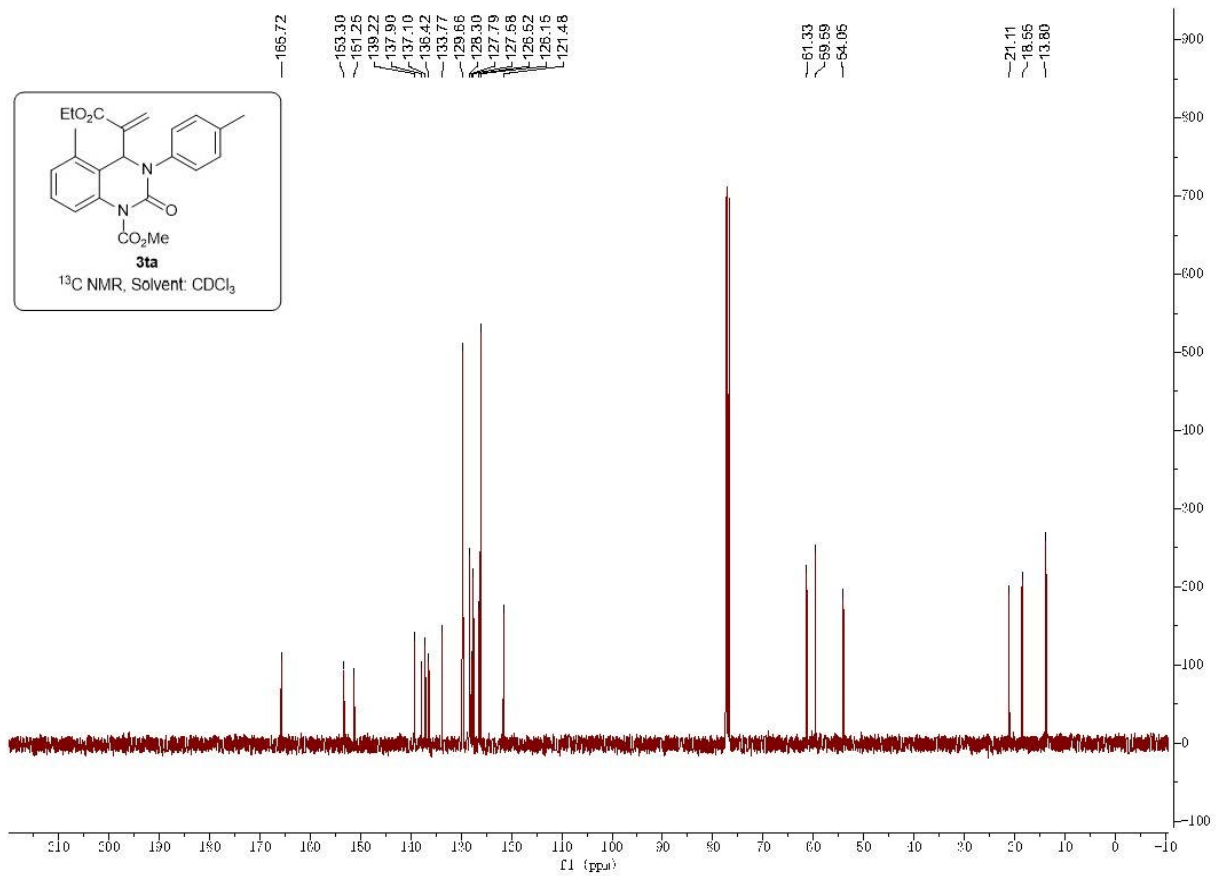

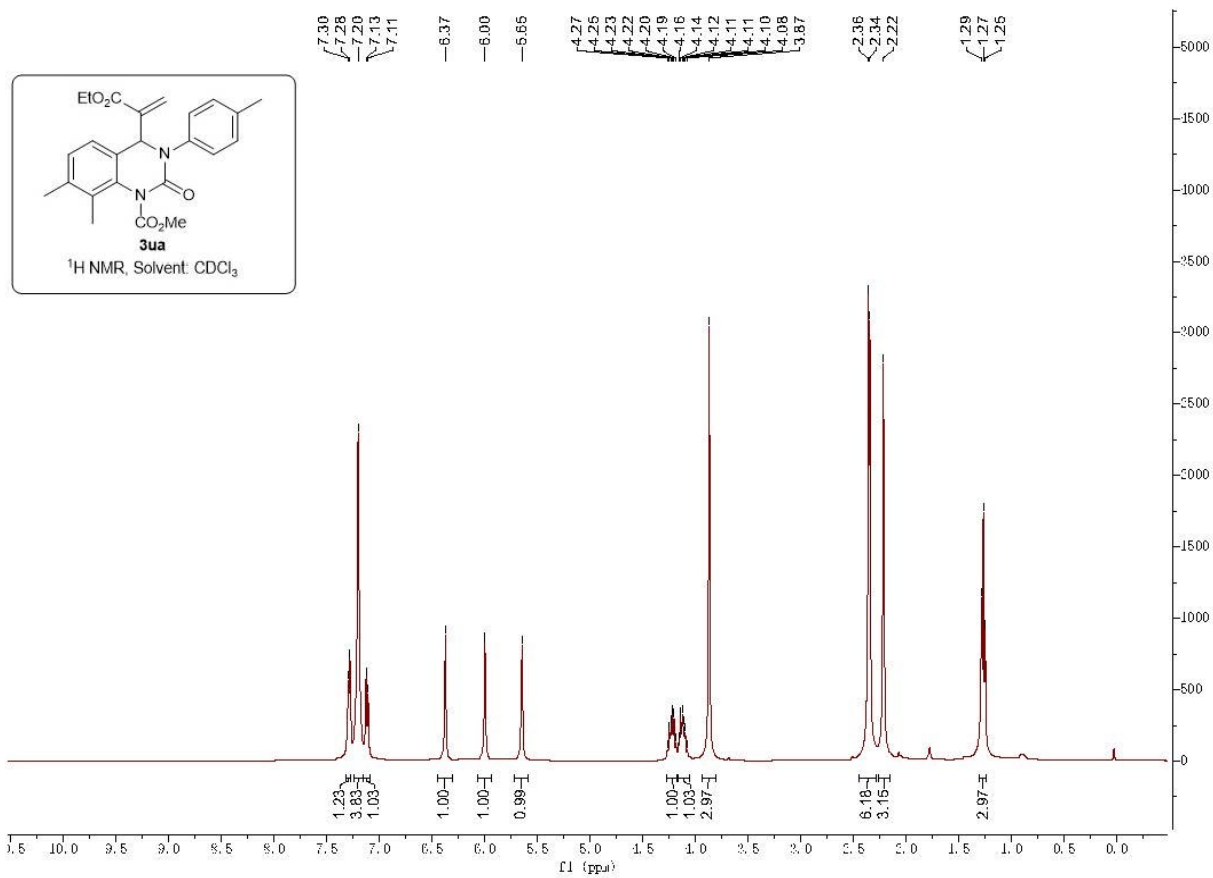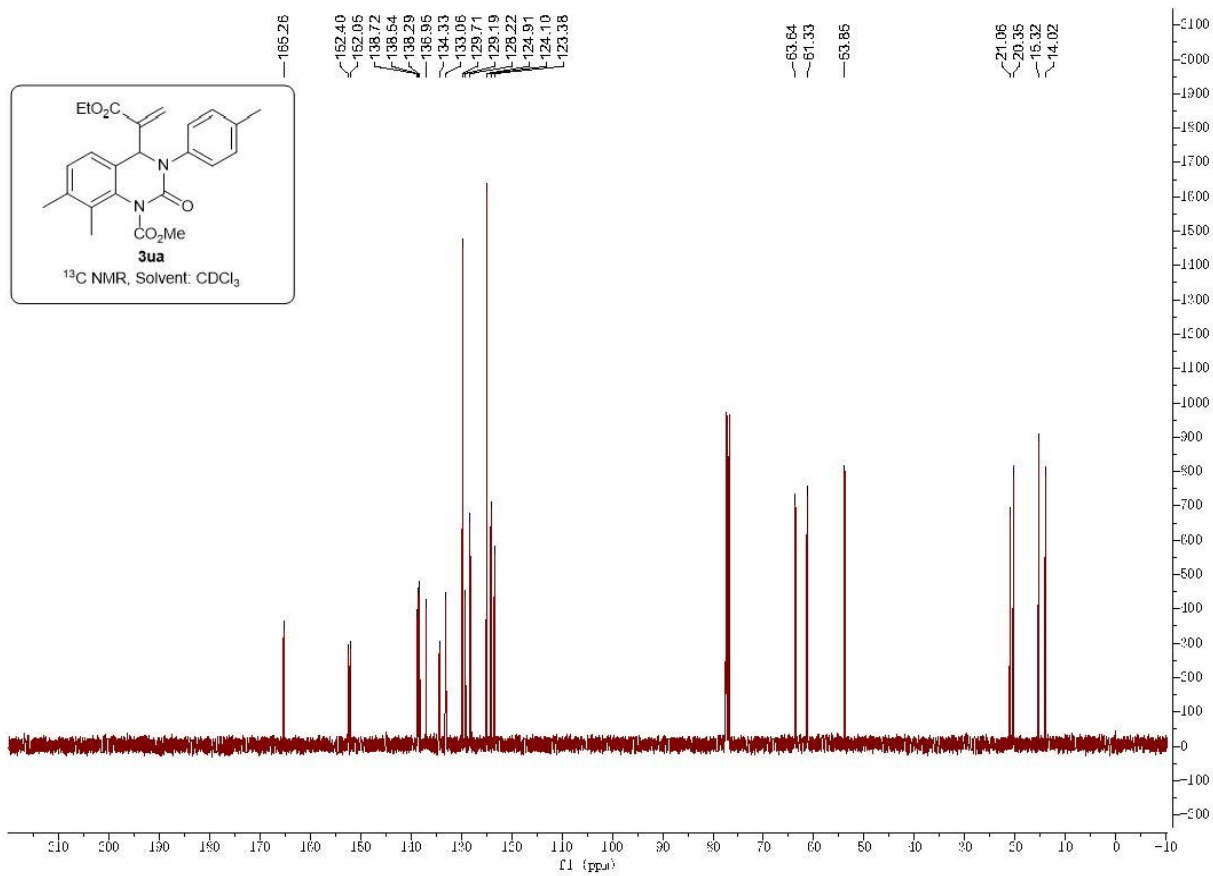

### 8.3. Products of Derivatization

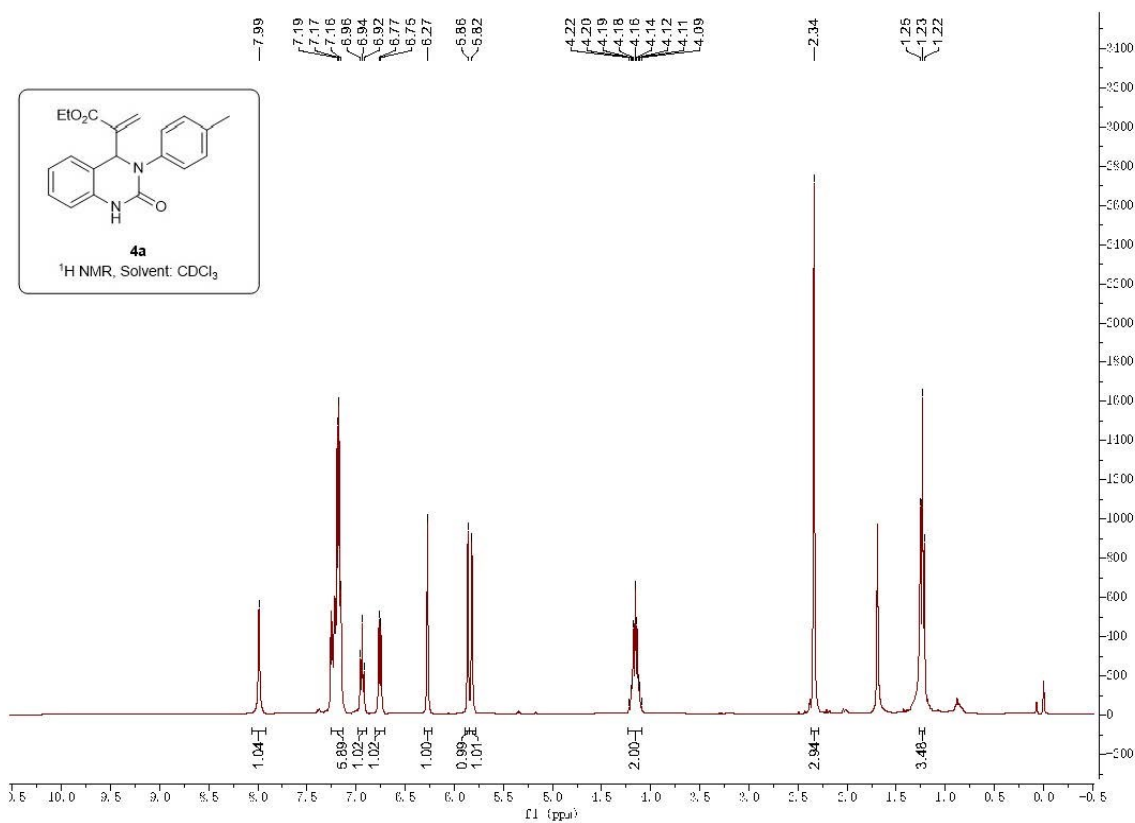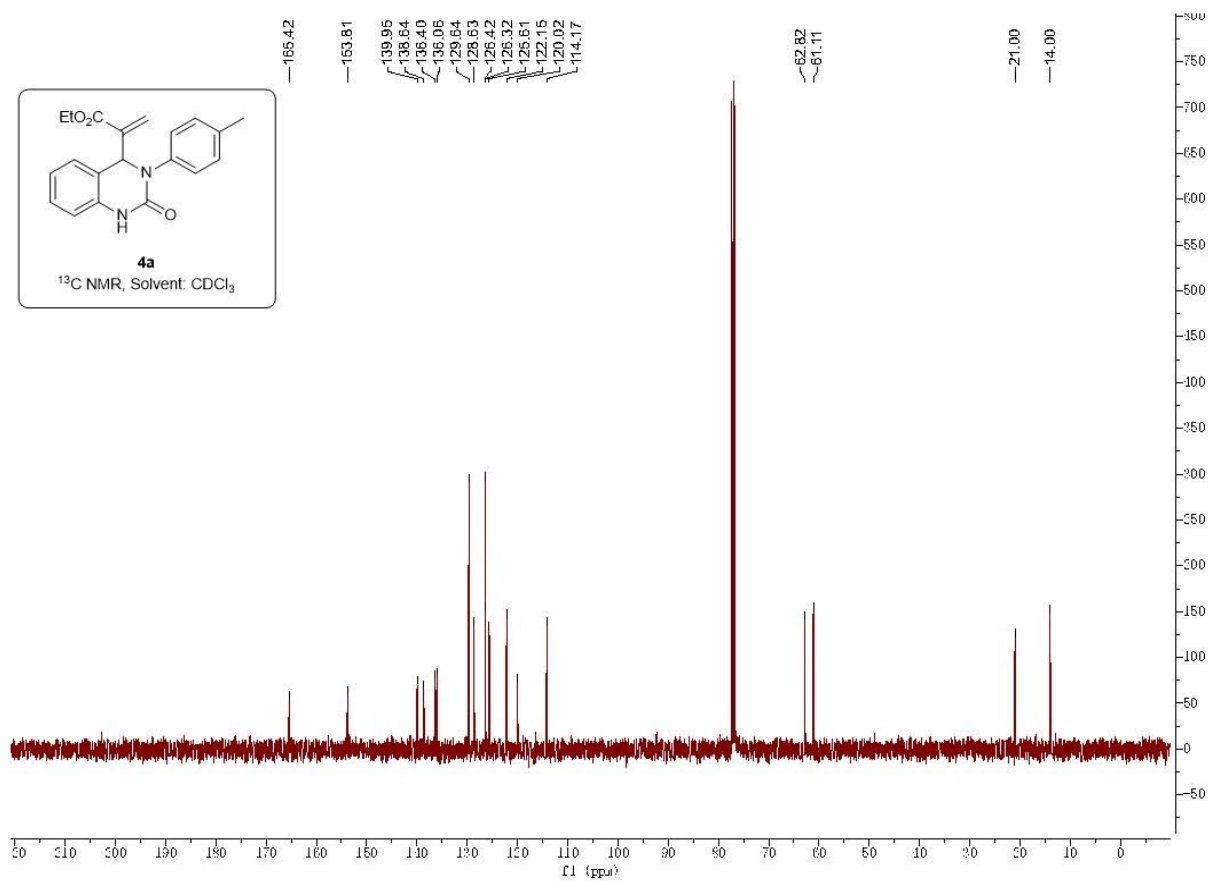

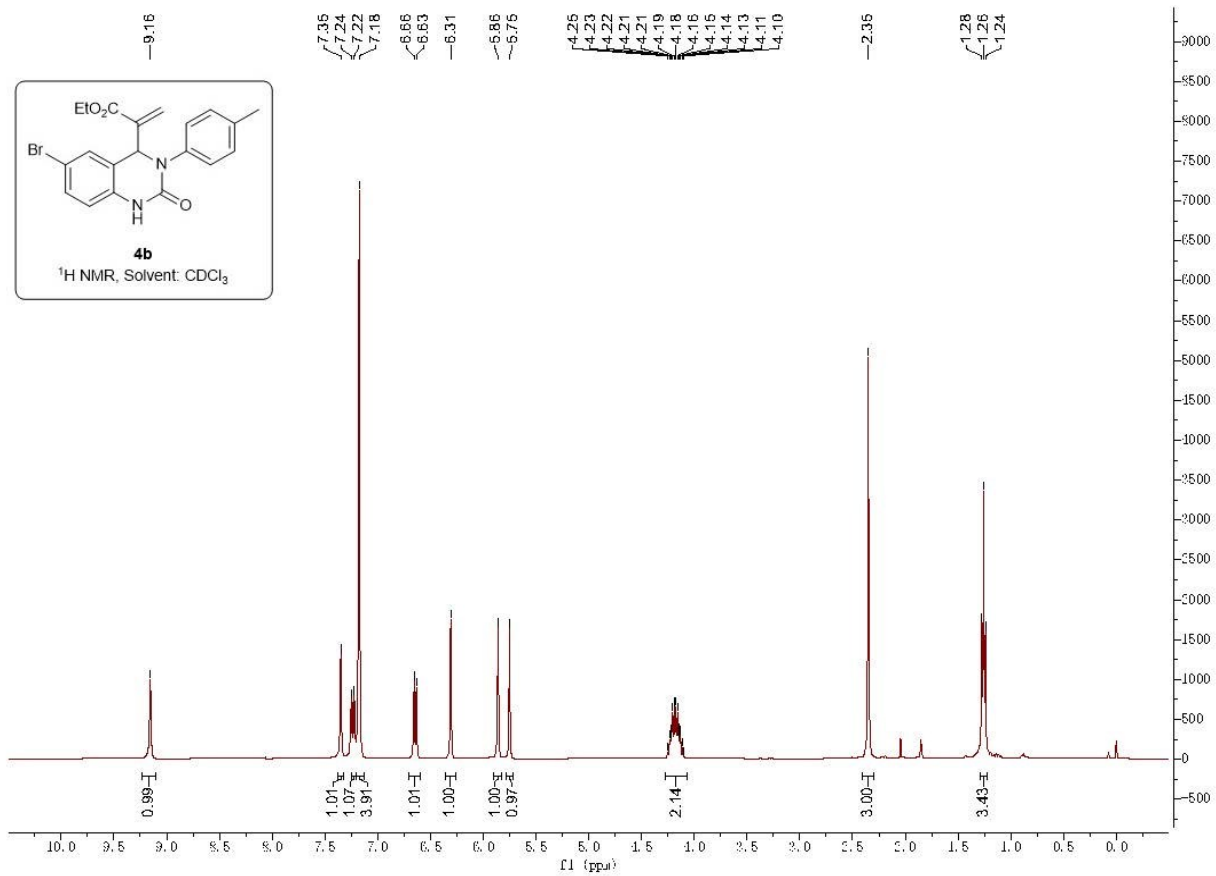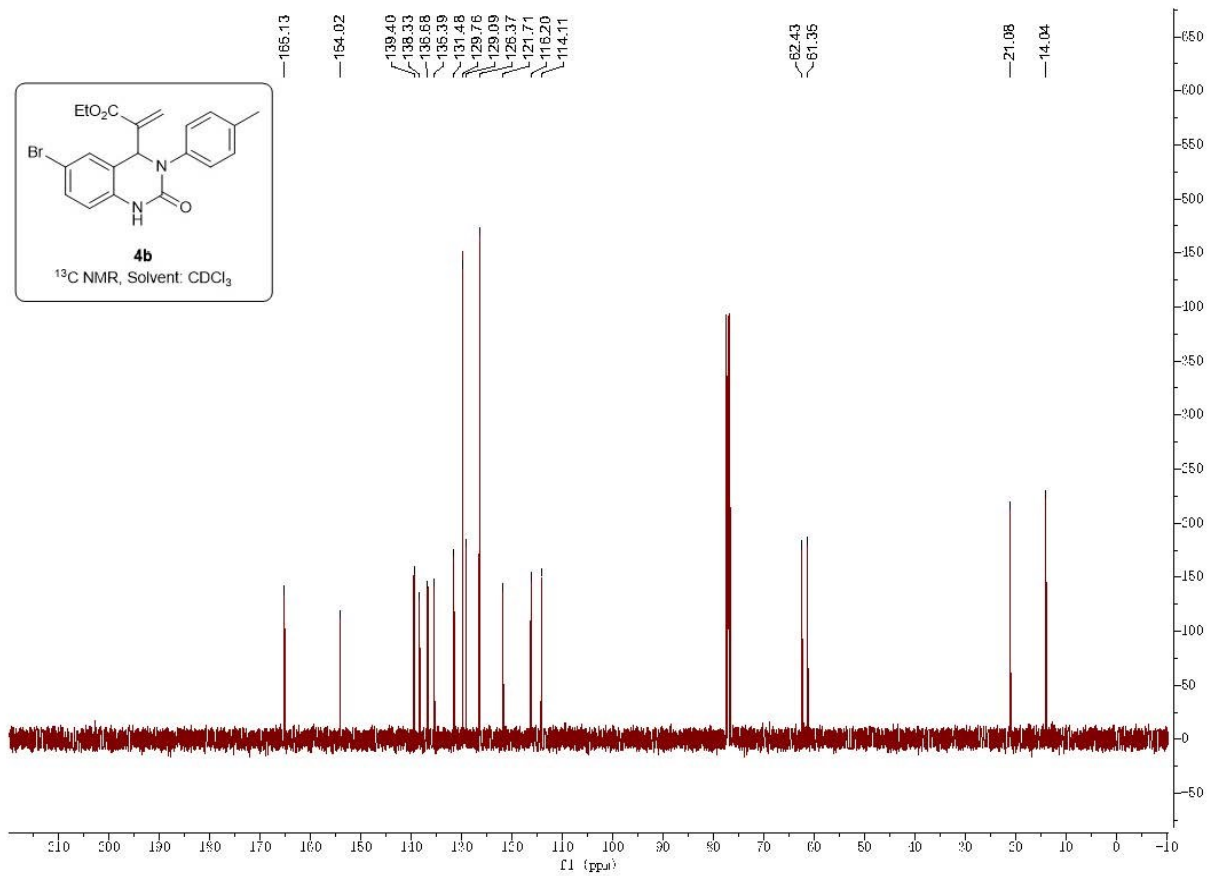

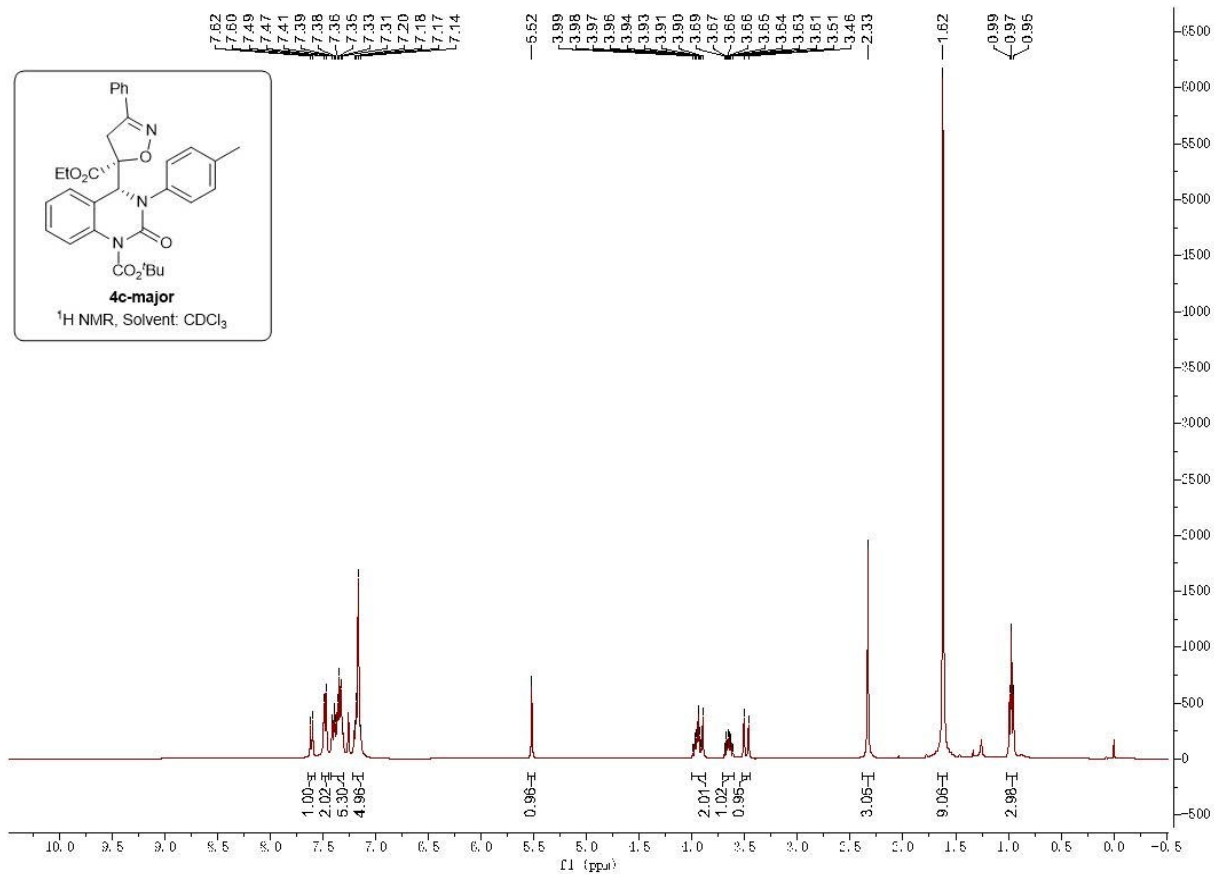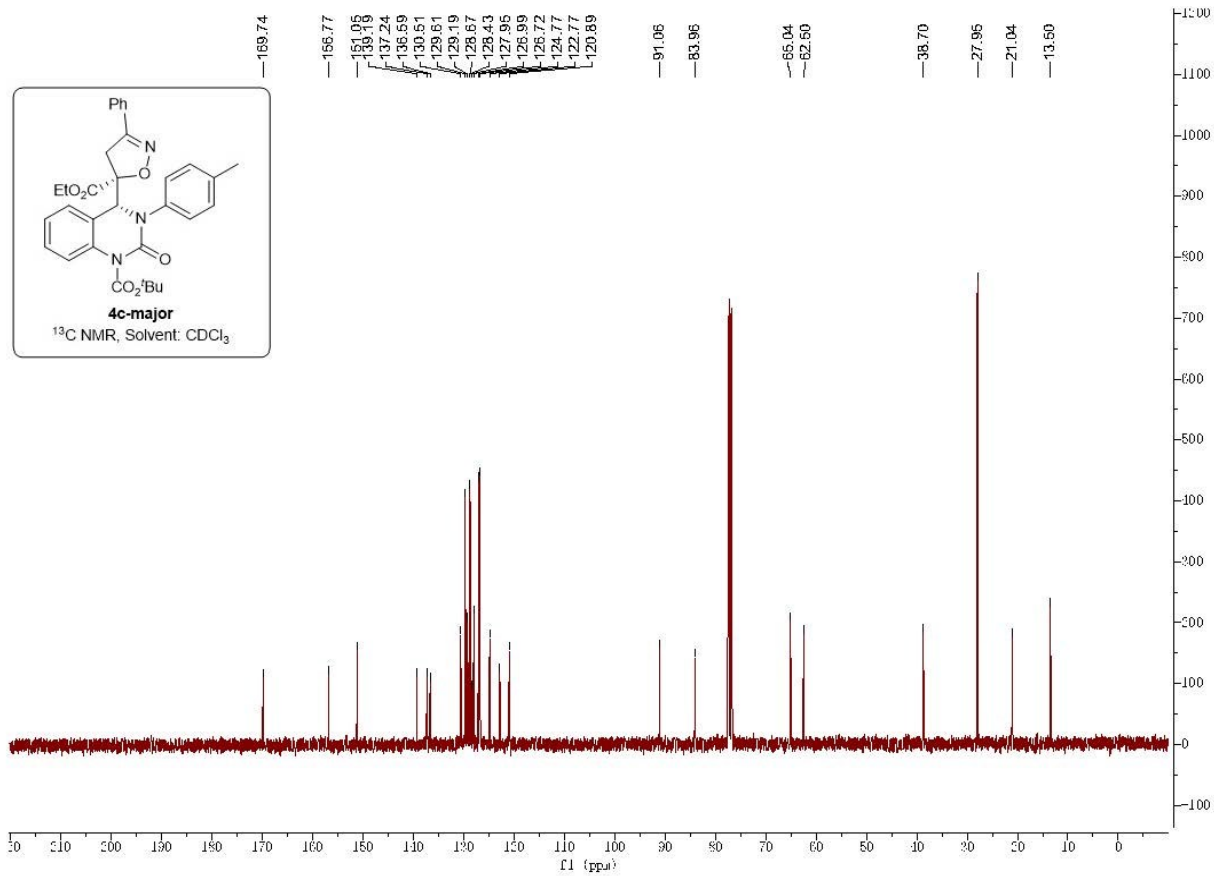

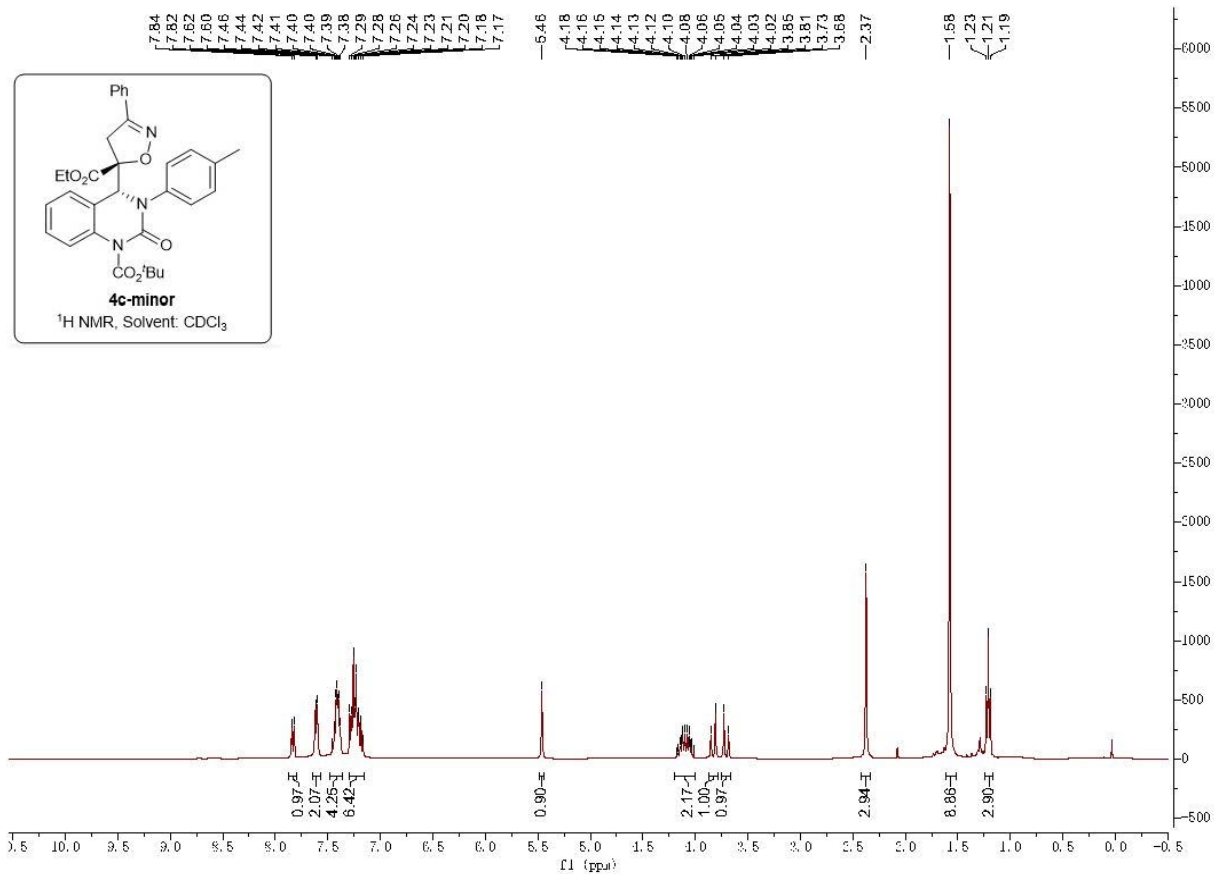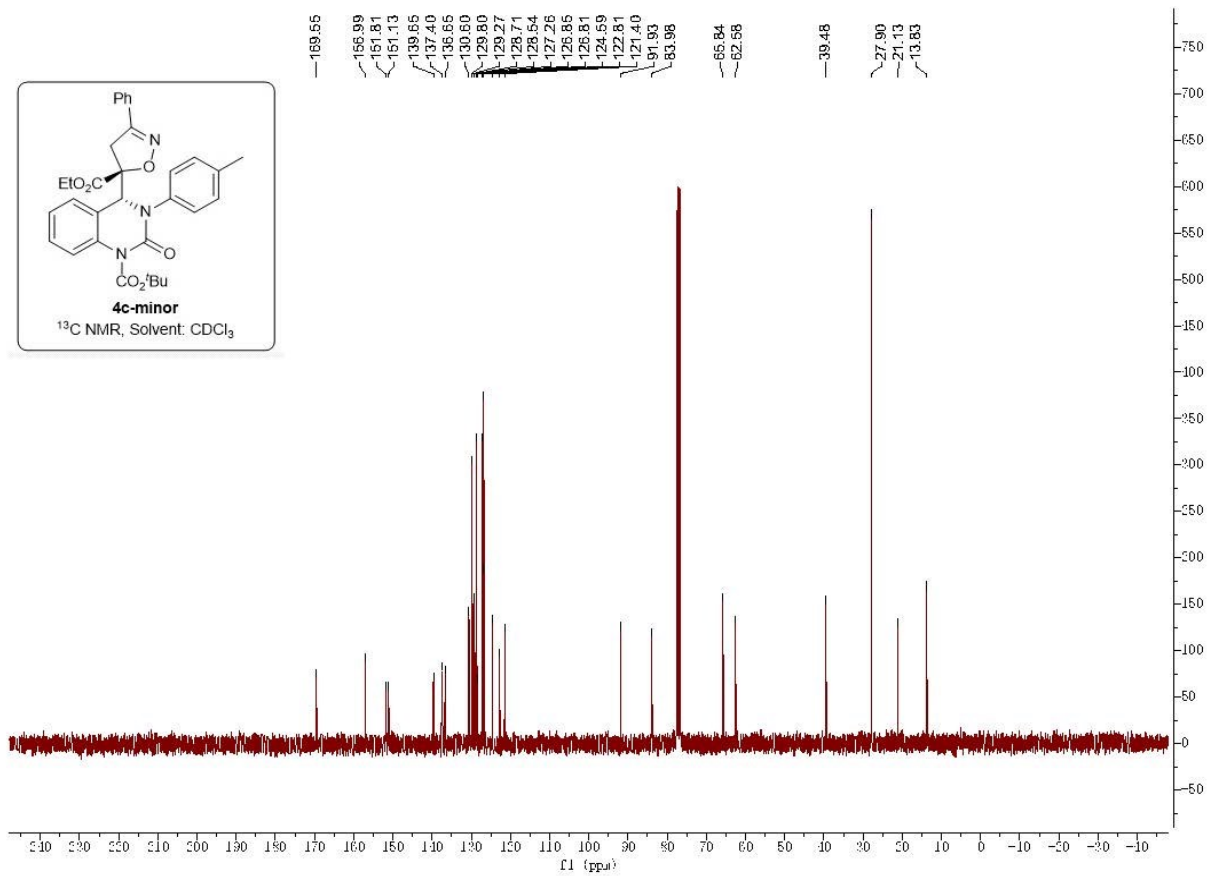

Supplement: d1cc03502a1.pdf [file d1cc03502a1.pdf]
